# Supplementary material for: Kv3.3 subunits control presynaptic action potential waveform and neurotransmitter release at a central excitatory synapse
Source: eLife. 2022 May 5;11:e75219. doi: 10.7554/eLife.75219 (PMC9110028; doi:10.7554/eLife.75219)
Supplement: Figure 1—figure supplement 1—source data 1. [file elife-75219-fig1-figsupp1-data1.xlsx]

## Sheet: Figure 1-figure supplement 1
Figure 1-figure supplement 1
What are the mRNA levels for the kcnc family genes in the cochlear nucleus of a CBA mice?
		gene_id	c1nuc2	c1nuc3	c1nuc4	c7nuc1	c7nuc2	c7nuc3	c28nuc2	c28nuc3	c28nuc4
		Kcnc1	55.0226	6.25941	42.5618	56.6014	59.3277	59.7622	61.15	75.8644	75.4564
		Kcnc2	10.7204	14.4453	11.3291	11.5966	13.6831	9.54654	11.5905	15.1459	14.7075
		Kcnc3	71.2136	65.972	56.0529	82.8201	94.2311	99.8354	103.026	117.1	115.624
		Kcnc4	13.3437	12.9767	12.79	20.593	18.1228	14.7335	16.3975	20.9582	23.1294
