# Supplementary material for: Kv3.3 subunits control presynaptic action potential waveform and neurotransmitter release at a central excitatory synapse
Source: eLife. 2022 May 5;11:e75219. doi: 10.7554/eLife.75219 (PMC9110028; doi:10.7554/eLife.75219)
Supplement: Figure 1—figure supplement 4—source data 1. [file elife-75219-fig1-figsupp4-data1.xlsx]

## Sheet: Figure1-figure supplement 4
Figure1-figure supplement 4	Do Kv3.1 and Kv3.3 contribute to different parts of the AP?		For 50% AP width, see figure 1E
Figure1-figure supplement 4C		AP width at 25% of peak amplitude (ms)
		WT (n=10)	WT + TEA (n=7)	Kv3.3 KO (n=6)	Kv3.1 KO (n=5)
		0.35	0.64	0.54	0.43
		0.41	1.03	0.42	0.48
		0.36	1.17	0.57	0.39
		0.4	0.8	0.57	0.48
		0.42	0.74	0.69	0.49
		0.38	0.79	0.62
		0.4	0.63
		0.4
		0.39
		0.38
	Average	0.389	0.828571	0.568333	0.454
	One-way ANOVA & Tukey’s multiple comparison.		P= <0.0001 compared to WT	P= 0.0127 compared to WT	P=0.6080 Compared to WT
		AP width at 75% of peak amplitude (ms)
		WT (n=10)	WT + TEA (n=7)	Kv3.3 KO (n=6)	Kv3.1 KO (n=5)
		0.16	0.44	0.25	0.2
		0.19	0.58	0.2	0.22
		0.16	0.76	0.26	0.18
		0.18	0.5	0.27	0.2
		0.19	0.48	0.31	0.21
		0.17	0.51	0.28
		0.18	0.43
		0.19
		0.17
		0.18
	Average	0.177	0.528571	0.261667	0.202
	One-way ANOVA & Tukey’s multiple comparison.		P= <0.0001 compared to WT	P= 0.0317 compared to WT	P=0.8076 Compared to WT
