# Supplementary material for: Kv3.3 subunits control presynaptic action potential waveform and neurotransmitter release at a central excitatory synapse
Source: eLife. 2022 May 5;11:e75219. doi: 10.7554/eLife.75219 (PMC9110028; doi:10.7554/eLife.75219)
Supplement: Figure 1—source data 1. [file elife-75219-fig1-data1.xlsx]

## Sheet: Figure 1
Figure 1A	Is there a Kv3 current in the presynaptic terminal?
		Current (nA)
	Voltage command (mV)	Wildtype (WT) n=7							Average		WT + TEA (n=6)						Average
	20	17.0528	12.8278	11.4606	6.9209	12.8194	10.7175	14.4533	12.3217		8.12248	9.81133	11.6327	8.39652	9.31919	10.3105	9.59879
	10	13.8266	9.86482	8.169	5.3726	9.85324	7.95849	10.5141	9.36555		5.29094	6.73699	7.99421	6.10494	6.65453	7.29646	6.67968
	0	10.3144	6.88617	5.32386	3.9883	6.87413	5.48656	7.23785	6.58732		3.6366	4.43961	4.95678	4.21168	4.34624	5.02765	4.43643
	-10	6.34373	4.35699	3.23942	2.7653	4.34744	3.50563	4.70309	4.18023		2.54986	3.03227	2.77063	2.83316	2.79499	3.44794	2.90481
	-20	2.79964	2.48763	1.80878	1.76684	2.48278	2.11612	2.90528	2.33815		1.86061	2.03504	1.70549	1.94297	1.83141	2.24403	1.93659
	-30	1.13001	1.38542	0.944893	1.03284	1.38298	1.17779	1.67068	1.24637		1.14699	1.24164	0.992522	1.14626	1.06193	1.34216	1.15525
	-40	0.471522	0.591499	0.372636	0.520577	0.590521	0.459675	0.801794	0.544032		0.561641	0.588099	0.434227	0.53141	0.441005	0.631546	0.531321
	-50	0.146978	0.089599	0.0506	0.214355	0.089808	-0.00293	0.218861	0.115324		0.208077	0.204089	0.125905	0.092589	0.068041	0.19208	0.148463
	-60	0.017594	-0.12103	-0.09686	0.088249	-0.12048	-0.1918	-0.01815	-0.063211		0.062011	0.068096	-0.03597	-0.11596	-0.09858	0.010478	-0.0183208
	-70	-0.05345	-0.22446	-0.18773	0.026049	-0.22423	-0.29977	-0.12713	-0.155817		-0.0979	-0.05645	-0.1854	-0.2119	-0.24591	-0.11335	-0.151818
	-80	-0.10079	-0.33693	-0.31664	-0.08298	-0.33708	-0.41349	-0.21462	-0.257504		-0.23367	-0.15931	-0.34781	-0.35158	-0.45807	-0.22854	-0.296497
	-90	-0.1634	-0.4721	-0.47048	-0.18791	-0.47253	-0.54675	-0.31705	-0.375746		-0.38923	-0.28199	-0.5352	-0.54629	-0.70567	-0.35164	-0.468337
	-100	-0.25431	-0.63036	-0.66749	-0.33816	-0.63108	-0.70122	-0.43678	-0.522771		-0.55777	-0.40595	-0.74876	-0.79596	-0.97177	-0.48863	-0.661473
	-110	-0.3804	-0.80582	-0.88634	-0.52237	-0.8069	-0.8637	-0.5826	-0.69259		-0.74607	-0.53713	-0.97901	-1.09315	-1.23306	-0.63192	-0.870057
Figure 1A (inset)	How big is the presynaptic Kv3 current (at +10mV)?		WT (nA)	WT + TEA (nA)
			13.8266	5.29094
			9.86482	6.73699
			8.169	7.99421
			5.3726	6.10494
			9.85324	6.65453
			7.95849	7.29646
			10.5141
		Average	9.36555	6.67968
				Unpaired t-test, compared to WT P value = 0.0392
Figure 1E	Do Kv3.1 and Kv3.3 subunits contribute to action potential repolarisation?		AP half-width (ms)
			WT (n=10)	WT + TEA (n=7)	Kv3.3 KO (n=6)	Kv3.1 KO (n=5)
			0.253171	0.401237	0.412139	0.307326
			0.29212	0.634816	0.408734	0.344774
			0.257159	0.646526	0.473865	0.288033
			0.279601	0.505425	0.444	0.332436
			0.306515	0.477967	0.38448	0.333525
			0.275224	0.484731	0.444172
			0.298027	0.390282
			0.275242
			0.281401
			0.284684
		Average	0.280314	0.505855	0.427898	0.321219
		One-way ANOVA & Tukey’s post hoc		P= <0.0001 compared to WT	P= 0.0001 compared to WT	P=0.5316 Compared to WT
Figure 1F			AP amplitude (mV)
			WT (n=10)	WT + TEA (n=7)	Kv3.3 KO (n=6)	Kv3.1 KO (n=5)
			47.1872	53.2704	44.6683	34.8575
			43.6875	33.477	38.7517	30.6823
			36.8033	46.8489	40.592	42.9438
			46.8786	44.473	45.0086	30.6179
			34.7968	54.4329	35.6756	35.3865
			36.0785	48.9364	38.775
			37.6702	48.4863
			37.2682
			35.3151
			42.9445
		Average	39.863	47.1321	40.5785	34.8976
		One-way ANOVA & Tukey’s post hoc		P=0.0458 Compared to WT	P=0.9935 Compared to WT	P=0.3354 Compared to WT
Figure 1G			Decay slope (mV/ms)
			WT (n=10)	WT + TEA (n=7)	Kv3.3 KO (n=6)	Kv3.1 KO (n=5)
			131	91	69	69
			103	27	63	51
			96	40	51	92
			129	47	62	56
			73	69	81	64
			86	62	46
			89	84
			92
			81
			113
		Average	99.3	60	62	66.4
		One-way ANOVA & Tukey’s post hoc		P=0.0016 Compared to WT	P=0.0042 Compared to WT	P=0.0195 Compared to WT
Figure 1H			Rise slope (mV/ms)
			WT (n=10)	WT + TEA (n=7)	Kv3.3 KO (n=6)	Kv3.1 KO (n=5)
			278	271	249	223
			243	193	192	189
			242	212	197	286
			196	285	188	182
			221	259	234	222
			229	297	132
			232	130
			231
			248
			146
		Average	220.889	229.333	188.6	219.75
		One-way ANOVA P=0.5112
Figure 1I			Membrane resistance (MΩ)
			WT (n=10)	WT + TEA (n=7)	Kv3.3 KO (n=6)	Kv3.1 KO (n=5)
			174	308	281	192
			306	257	189	219
			191	138	241	253
			187	162	175	138
			280	151	242	215
			166	172	208
			236	198
			251
			261
			244
		Average	235.778	179.667	211	206.25
		One-way ANOVA P=0.5595
