# Supplementary material for: Kv3.3 subunits control presynaptic action potential waveform and neurotransmitter release at a central excitatory synapse
Source: eLife. 2022 May 5;11:e75219. doi: 10.7554/eLife.75219 (PMC9110028; doi:10.7554/eLife.75219)
Supplement: Figure 3—figure supplement 1—source data 1. [file elife-75219-fig3-figsupp1-data1.xlsx]

## Sheet: Figure3-figure supplement 1
Figure3-figure supplement 1	Are quantal parameters affected in the Kv3.3 KO?
Figure3-figure supplement 1C		mEPSC amplitudes (pA)
		WT (n=900)	Kv3.3 KO (n=800)	Kv3.1 KO (n=800)
		137.739	137.895	111.24
		154.662	156.205	105.137
		206.801	150.102	123.447
		124.467	143.998	111.24
		105.786	137.895	111.24
		63.0652	168.412	111.24
		151.752	137.895	80.7227
		123.827	137.895	141.758
		91.3819	143.998	123.447
		213.565	125.687	178.379
		194.832	137.895	86.8262
		124.498	125.687	86.8262
		120.803	143.998	99.0332
		199.168	143.998	178.379
		87.9938	137.895	99.0332
		145.19	131.791	135.654
		108.271	107.377	135.654
		139.672	113.48	160.068
		187.949	101.273	62.4121
		136.196	113.48	99.0332
		75.318	107.377	92.9297
		178.223	82.9629	153.965
		88.4064	125.687	172.275
		161.235	113.48	215
		93.4896	125.687	208.896
		113.129	150.102	166.172
		229.277	131.791	153.965
		128.936	131.791	153.965
		88.0777	113.48	251.621
		86.8745	131.791	172.275
		102.322	119.584	123.447
		88.5827	107.377	86.8262
		199.8	125.687	74.6191
		176.944	89.0664	92.9297
		126.626	125.687	166.172
		89.2782	107.377	172.275
		173.508	150.102	74.6191
		139.607	107.377	251.621
		122.527	143.998	141.758
		155.124	119.584	160.068
		166.273	101.273	160.068
		133.143	95.1699	166.172
		208.485	150.102	141.758
		90.0745	89.0664	153.965
		133.61	95.1699	153.965
		196.232	89.0664	135.654
		117.835	95.1699	105.137
		160.075	76.8594	184.482
		98.492	107.377	129.551
		122.926	89.0664	80.7227
		137.598	125.687	306.553
		79.1859	82.9629	160.068
		120.672	70.7559	153.965
		144.649	168.412	123.447
		96.4367	95.1699	92.9297
		119.102	76.8594	105.137
		183.668	89.0664	184.482
		146.619	95.1699	92.9297
		235.259	89.0664	166.172
		131.21	82.9629	318.76
		174.237	107.377	129.551
		82.0019	95.1699	86.8262
		128.072	70.7559	117.344
		181.765	119.584	105.137
		170.982	113.48	147.861
		192.187	137.895	117.344
		215.578	131.791	153.965
		156.137	101.273	160.068
		129.216	76.8594	147.861
		93.8923	95.1699	123.447
		100.819	107.377	86.8262
		204.007	119.584	135.654
		144.519	107.377	135.654
		90.1669	119.584	153.965
		114.418	95.1699	160.068
		91.4006	162.309	251.621
		117.207	82.9629	129.551
		111.493	76.8594	196.689
		201.512	89.0664	50.2051
		107.156	101.273	123.447
		106.093	89.0664	117.344
		112.27	125.687	105.137
		118.158	76.8594	99.0332
		104.346	76.8594	184.482
		82.0294	76.8594	276.035
		122.659	76.8594	324.863
		191.258	89.0664	86.8262
		109.336	95.1699	129.551
		273.77	58.5488	123.447
		104.497	70.7559	92.9297
		229.496	82.9629	92.9297
		117.803	107.377	123.447
		95.4483	107.377	123.447
		116.63	125.687	105.137
		136.547	143.998	129.551
		162.609	101.273	68.5156
		97.5124	70.7559	105.137
		100.331	107.377	269.932
		136.226	150.102	111.24
		117.549	101.273	111.24
		263.553	95.1699	110.654
		110.965	125.687	104.551
		141.482	223.344	116.758
		123.172	137.895	141.172
		68.2402	52.4453	165.586
		123.172	95.1699	67.9297
		214.725	119.584	128.965
		129.275	70.7559	98.4473
		110.965	76.8594	128.965
		202.518	95.1699	147.275
		202.518	113.48	104.551
		117.068	186.723	92.3437
		62.1367	76.8594	92.3437
		135.379	107.377	220.518
		165.896	125.687	104.551
		129.275	162.309	135.068
		141.482	58.5488	177.793
		117.068	174.516	74.0332
		80.4473	76.8594	92.3437
		159.793	70.7559	86.2402
		141.482	70.7559	141.172
		110.965	89.0664	183.896
		233.035	156.205	104.551
		98.7578	76.8594	238.828
		123.172	89.0664	232.725
		165.896	113.48	153.379
		123.172	70.7559	141.172
		141.482	76.8594	257.139
		86.5508	107.377	135.068
		123.172	64.6523	128.965
		74.3437	95.1699	80.1367
		208.621	76.8594	305.967
		245.242	89.0664	238.828
		104.861	89.0664	165.586
		98.7578	125.687	86.2402
		129.275	89.0664	165.586
		117.068	186.723	110.654
		153.689	82.9629	98.4473
		159.793	119.584	110.654
		257.449	113.48	226.621
		74.3437	95.1699	153.379
		104.861	95.1699	80.1367
		74.3437	113.48	263.242
		153.689	119.584	141.172
		135.379	95.1699	80.1367
		104.861	113.48	104.551
		110.965	156.205	98.4473
		110.965	119.584	122.861
		80.4473	107.377	98.4473
		165.896	125.687	159.482
		141.482	70.7559	98.4473
		172	89.0664	98.4473
		117.068	107.377	232.725
		117.068	101.273	128.965
		117.068	113.48	116.758
		123.172	82.9629	257.139
		117.068	107.377	122.861
		141.482	101.273	122.861
		92.6543	101.273	135.068
		165.896	70.7559	98.4473
		86.5508	143.998	141.172
		153.689	119.584	257.139
		147.586	125.687	128.965
		251.346	107.377	80.1367
		98.7578	70.7559	135.068
		226.932	107.377	116.758
		117.068	101.273	92.3437
		104.861	82.9629	74.0332
		196.414	95.1699	92.3437
		123.172	89.0664	110.654
		68.2402	131.791	177.793
		129.275	82.9629	128.965
		104.861	70.7559	128.965
		135.379	70.7559	128.965
		141.482	101.273	110.654
		110.965	150.102	92.3437
		104.861	95.1699	98.4473
		123.172	162.309	61.8262
		159.793	137.895	141.172
		98.7578	113.48	92.3437
		135.379	119.584	80.1367
		117.068	89.0664	147.275
		80.4473	192.826	80.1367
		147.586	70.7559	147.275
		239.139	125.687	190
		98.7578	89.0664	74.0332
		135.379	125.687	141.172
		233.035	174.516	135.068
		129.275	113.48	122.861
		74.3437	76.8594	104.551
		117.068	64.6523	141.172
		68.2402	101.273	116.758
		147.586	52.4453	183.896
		165.896	113.48	98.4473
		208.621	82.9629	336.484
		129.275	119.584	122.861
		110.965	64.6523	324.277
		86.5508	125.687	232.725
		135.379	101.273	80.1367
		117.068	137.895	141.172
		128.377	88.5156	71.8945
		158.895	112.93	71.8945
		128.377	88.5156	71.8945
		79.5488	106.826	90.2051
		213.826	112.93	53.584
		189.412	125.137	65.791
		171.102	88.5156	84.1016
		152.791	94.6191	65.791
		91.7559	100.723	90.2051
		183.309	119.033	59.6875
		177.205	106.826	65.791
		128.377	106.826	71.8945
		201.619	88.5156	59.6875
		146.687	94.6191	102.412
		122.273	70.2051	90.2051
		152.791	125.137	71.8945
		140.584	82.4121	53.584
		183.309	82.4121	65.791
		97.8594	125.137	84.1016
		171.102	88.5156	71.8945
		128.377	119.033	102.412
		134.48	82.4121	65.791
		146.687	112.93	84.1016
		152.791	125.137	65.791
		213.826	64.1016	71.8945
		116.17	106.826	90.2051
		158.895	167.861	96.3086
		189.412	137.344	96.3086
		171.102	106.826	90.2051
		134.48	82.4121	47.4805
		128.377	94.6191	71.8945
		219.93	149.551	84.1016
		91.7559	167.861	71.8945
		97.8594	82.4121	90.2051
		116.17	70.2051	47.4805
		91.7559	106.826	126.826
		164.998	119.033	77.998
		171.102	119.033	53.584
		164.998	82.4121	126.826
		146.687	64.1016	90.2051
		171.102	143.447	59.6875
		128.377	125.137	71.8945
		146.687	88.5156	90.2051
		146.687	94.6191	71.8945
		201.619	167.861	84.1016
		73.4453	125.137	59.6875
		195.516	94.6191	77.998
		122.273	155.654	71.8945
		213.826	94.6191	77.998
		171.102	64.1016	71.8945
		140.584	82.4121	90.2051
		171.102	88.5156	96.3086
		85.6523	94.6191	90.2051
		122.273	94.6191	77.998
		183.309	76.3086	77.998
		171.102	131.24	90.2051
		164.998	119.033	65.791
		103.963	94.6191	102.412
		152.791	131.24	96.3086
		293.172	94.6191	59.6875
		152.791	88.5156	84.1016
		85.6523	88.5156	53.584
		305.379	82.4121	84.1016
		164.998	125.137	102.412
		134.48	100.723	90.2051
		177.205	82.4121	90.2051
		219.93	100.723	84.1016
		158.895	119.033	77.998
		219.93	173.965	65.791
		152.791	137.344	84.1016
		128.377	106.826	71.8945
		116.17	112.93	96.3086
		134.48	137.344	114.619
		128.377	100.723	132.93
		134.48	131.24	84.1016
		158.895	131.24	77.998
		79.5488	100.723	120.723
		146.687	125.137	132.93
		287.068	149.551	65.791
		122.273	119.033	84.1016
		85.6523	100.723	84.1016
		183.309	125.137	102.412
		85.6523	88.5156	108.516
		116.17	167.861	84.1016
		177.205	70.2051	65.791
		140.584	119.033	65.791
		244.344	106.826	77.998
		122.273	100.723	71.8945
		134.48	100.723	77.998
		164.998	143.447	65.791
		134.48	125.137	59.6875
		158.895	100.723	71.8945
		97.8594	70.2051	71.8945
		110.066	70.2051	102.412
		91.7559	94.6191	77.998
		146.687	112.93	102.412
		97.8594	131.24	59.6875
		128.377	76.3086	71.8945
		128.377	82.4121	65.791
		146.687	131.24	108.516
		100.723	60.3418	168.828
		137.344	96.9629	113.896
		137.344	115.273	162.725
		137.344	66.4453	107.793
		131.24	127.48	95.5859
		143.447	96.9629	83.3789
		192.275	121.377	89.4824
		94.6191	84.7559	193.242
		106.826	109.17	101.689
		112.93	60.3418	95.5859
		119.033	60.3418	174.932
		125.137	121.377	272.588
		112.93	84.7559	162.725
		88.5156	133.584	168.828
		143.447	66.4453	95.5859
		88.5156	54.2383	107.793
		131.24	90.8594	193.242
		131.24	72.5488	113.896
		119.033	78.6523	107.793
		131.24	60.3418	187.139
		94.6191	90.8594	156.621
		155.654	60.3418	77.2754
		137.344	78.6523	162.725
		119.033	151.895	107.793
		180.068	115.273	101.689
		82.4121	60.3418	58.9648
		112.93	72.5488	120
		82.4121	54.2383	71.1719
		125.137	60.3418	150.518
		125.137	84.7559	120
		88.5156	90.8594	107.793
		82.4121	109.17	162.725
		88.5156	90.8594	101.689
		119.033	96.9629	58.9648
		88.5156	66.4453	83.3789
		100.723	60.3418	83.3789
		106.826	84.7559	95.5859
		76.3086	66.4453	65.0684
		149.551	103.066	65.0684
		149.551	72.5488	83.3789
		137.344	121.377	89.4824
		125.137	90.8594	168.828
		119.033	96.9629	211.553
		149.551	103.066	168.828
		131.24	78.6523	162.725
		143.447	54.2383	205.449
		131.24	78.6523	120
		119.033	78.6523	101.689
		137.344	72.5488	95.5859
		137.344	103.066	95.5859
		173.965	103.066	168.828
		143.447	121.377	89.4824
		125.137	54.2383	95.5859
		82.4121	90.8594	181.035
		100.723	66.4453	95.5859
		186.172	66.4453	107.793
		82.4121	103.066	101.689
		76.3086	90.8594	65.0684
		106.826	90.8594	187.139
		119.033	103.066	113.896
		88.5156	66.4453	77.2754
		88.5156	48.1348	77.2754
		131.24	66.4453	193.242
		131.24	109.17	211.553
		88.5156	78.6523	120
		143.447	78.6523	107.793
		112.93	78.6523	144.414
		94.6191	103.066	120
		112.93	121.377	107.793
		125.137	54.2383	107.793
		100.723	48.1348	193.242
		94.6191	54.2383	95.5859
		131.24	133.584	162.725
		131.24	78.6523	89.4824
		112.93	96.9629	101.689
		125.137	90.8594	107.793
		131.24	72.5488	107.793
		112.93	90.8594	83.3789
		112.93	54.2383	71.1719
		161.758	72.5488	187.139
		119.033	66.4453	101.689
		149.551	60.3418	217.656
		82.4121	54.2383	65.0684
		167.861	78.6523	95.5859
		106.826	66.4453	150.518
		137.344	133.584	89.4824
		143.447	60.3418	162.725
		100.723	84.7559	174.932
		100.723	54.2383	162.725
		100.723	60.3418	223.76
		161.758	60.3418	113.896
		112.93	133.584	156.621
		143.447	66.4453	107.793
		100.723	72.5488	205.449
		112.93	127.48	101.689
		88.5156	84.7559	95.5859
		143.447	109.17	95.5859
		94.6191	121.377	113.896
		100.723	48.1348	107.793
		106.826	78.6523	101.689
		133.998	80.4102	261.035
		85.1699	80.4102	132.861
		103.48	117.031	90.1367
		140.102	98.7207	102.344
		176.723	86.5137	163.379
		182.826	86.5137	132.861
		127.895	92.6172	84.0332
		121.791	92.6172	126.758
		140.102	80.4102	126.758
		164.516	80.4102	108.447
		121.791	86.5137	108.447
		140.102	92.6172	120.654
		133.998	80.4102	138.965
		127.895	86.5137	96.2402
		121.791	86.5137	90.1367
		158.412	117.031	151.172
		182.826	80.4102	71.8262
		164.516	98.7207	96.2402
		133.998	117.031	65.7227
		91.2734	74.3066	90.1367
		188.93	68.2031	169.482
		127.895	62.0996	138.965
		158.412	92.6172	108.447
		121.791	80.4102	108.447
		97.377	43.7891	114.551
		152.309	135.342	90.1367
		140.102	80.4102	273.242
		121.791	62.0996	163.379
		91.2734	104.824	132.861
		103.48	129.238	291.553
		182.826	80.4102	90.1367
		158.412	86.5137	169.482
		121.791	92.6172	90.1367
		133.998	74.3066	193.896
		127.895	62.0996	126.758
		79.0664	80.4102	175.586
		103.48	74.3066	187.793
		127.895	86.5137	138.965
		103.48	80.4102	169.482
		176.723	68.2031	65.7227
		195.033	80.4102	145.068
		97.377	68.2031	151.172
		133.998	98.7207	114.551
		91.2734	62.0996	236.621
		91.2734	80.4102	120.654
		109.584	49.8926	236.621
		164.516	55.9961	151.172
		127.895	92.6172	126.758
		140.102	74.3066	126.758
		164.516	92.6172	102.344
		201.137	62.0996	126.758
		188.93	80.4102	151.172
		158.412	80.4102	90.1367
		188.93	98.7207	151.172
		133.998	55.9961	96.2402
		146.205	68.2031	77.9297
		103.48	68.2031	175.586
		146.205	80.4102	84.0332
		176.723	74.3066	151.172
		182.826	74.3066	114.551
		121.791	110.928	132.861
		133.998	31.582	84.0332
		115.687	55.9961	108.447
		243.861	55.9961	151.172
		133.998	49.8926	163.379
		121.791	98.7207	84.0332
		109.584	104.824	157.275
		140.102	55.9961	151.172
		91.2734	62.0996	181.689
		140.102	68.2031	102.344
		231.654	62.0996	77.9297
		115.687	74.3066	96.2402
		85.1699	55.9961	138.965
		188.93	43.7891	59.6191
		115.687	104.824	59.6191
		133.998	74.3066	102.344
		91.2734	98.7207	65.7227
		133.998	92.6172	145.068
		109.584	86.5137	163.379
		121.791	43.7891	267.139
		237.758	68.2031	90.1367
		201.137	117.031	96.2402
		146.205	62.0996	138.965
		140.102	117.031	132.861
		91.2734	74.3066	96.2402
		91.2734	141.445	53.5156
		85.1699	55.9961	77.9297
		140.102	68.2031	163.379
		158.412	55.9961	71.8262
		146.205	68.2031	114.551
		188.93	80.4102	96.2402
		103.48	92.6172	138.965
		256.068	68.2031	114.551
		91.2734	55.9961	90.1367
		91.2734	62.0996	120.654
		158.412	74.3066	151.172
		152.309	68.2031	151.172
		121.791	68.2031	102.344
		115.687	135.342	145.068
		140.102	92.6172	126.758
		187.549	80.7227	74.1016
		138.721	74.6191	98.5156
		199.756	74.6191	61.8945
		95.9961	111.24	67.998
		95.9961	92.9297	98.5156
		181.445	56.3086	80.2051
		108.203	99.0332	104.619
		120.41	99.0332	80.2051
		150.928	68.5156	80.2051
		218.066	92.9297	80.2051
		144.824	123.447	80.2051
		120.41	74.6191	55.791
		120.41	135.654	74.1016
		144.824	92.9297	86.3086
		120.41	86.8262	129.033
		144.824	99.0332	116.826
		157.031	117.344	104.619
		138.721	135.654	122.93
		181.445	111.24	80.2051
		236.377	68.5156	67.998
		95.9961	92.9297	61.8945
		138.721	141.758	55.791
		175.342	92.9297	92.4121
		169.238	92.9297	129.033
		199.756	68.5156	80.2051
		102.1	68.5156	67.998
		248.584	92.9297	61.8945
		175.342	99.0332	67.998
		102.1	80.7227	80.2051
		169.238	80.7227	74.1016
		114.307	80.7227	98.5156
		108.203	74.6191	92.4121
		175.342	99.0332	86.3086
		102.1	68.5156	74.1016
		126.514	62.4121	61.8945
		120.41	80.7227	61.8945
		102.1	74.6191	104.619
		102.1	117.344	43.584
		126.514	123.447	74.1016
		120.41	74.6191	86.3086
		126.514	141.758	129.033
		108.203	111.24	67.998
		193.652	99.0332	92.4121
		236.377	92.9297	49.6875
		163.135	74.6191	86.3086
		108.203	80.7227	55.791
		187.549	92.9297	61.8945
		120.41	74.6191	104.619
		102.1	129.551	80.2051
		132.617	62.4121	55.791
		95.9961	68.5156	74.1016
		138.721	74.6191	92.4121
		138.721	80.7227	92.4121
		126.514	74.6191	80.2051
		102.1	92.9297	92.4121
		169.238	80.7227	74.1016
		102.1	56.3086	80.2051
		199.756	50.2051	116.826
		175.342	68.5156	80.2051
		108.203	74.6191	135.137
		150.928	62.4121	104.619
		126.514	105.137	74.1016
		224.17	105.137	80.2051
		187.549	111.24	55.791
		108.203	135.654	110.723
		126.514	123.447	55.791
		169.238	129.551	49.6875
		157.031	99.0332	67.998
		126.514	80.7227	129.033
		138.721	68.5156	86.3086
		260.791	62.4121	67.998
		95.9961	86.8262	110.723
		163.135	105.137	116.826
		126.514	99.0332	55.791
		157.031	105.137	86.3086
		175.342	129.551	74.1016
		95.9961	80.7227	80.2051
		114.307	62.4121	74.1016
		95.9961	99.0332	92.4121
		126.514	86.8262	80.2051
		150.928	68.5156	74.1016
		150.928	92.9297	61.8945
		138.721	80.7227	61.8945
		138.721	80.7227	86.3086
		138.721	117.344	67.998
		199.756	92.9297	67.998
		157.031	99.0332	86.3086
		199.756	92.9297	61.8945
		157.031	80.7227	67.998
		193.652	80.7227	104.619
		150.928	80.7227	86.3086
		126.514	92.9297	61.8945
		95.9961	86.8262	110.723
		175.342	117.344	61.8945
		89.8926	92.9297	110.723
		187.549	80.7227	74.1016
		77.6855	86.8262	55.791
		126.514	68.5156	61.8945
		108.203	56.3086	67.998
		108.203	80.7227	92.4121
		164.551	90.7227	154.482
		140.137	66.3086	123.965
		134.033	182.275	148.379
		79.1016	109.033	81.2402
		91.3086	127.344	99.5508
		134.033	72.4121	117.861
		66.8945	133.447	148.379
		97.4121	78.5156	62.9297
		72.998	121.24	142.275
		85.2051	84.6191	93.4473
		152.344	163.965	69.0332
		97.4121	115.137	75.1367
		72.998	115.137	75.1367
		103.516	133.447	75.1367
		54.6875	139.551	148.379
		79.1016	109.033	62.9297
		91.3086	109.033	81.2402
		127.93	121.24	166.689
		72.998	145.654	50.7227
		85.2051	78.5156	117.861
		176.758	115.137	81.2402
		72.998	139.551	99.5508
		109.619	84.6191	111.758
		60.791	102.93	93.4473
		201.172	78.5156	142.275
		231.689	90.7227	93.4473
		91.3086	84.6191	62.9297
		158.447	47.998	75.1367
		97.4121	127.344	93.4473
		79.1016	121.24	117.861
		103.516	115.137	81.2402
		127.93	47.998	123.965
		115.723	102.93	81.2402
		79.1016	163.965	130.068
		97.4121	60.2051	87.3438
		115.723	151.758	56.8262
		103.516	78.5156	148.379
		134.033	78.5156	111.758
		85.2051	139.551	99.5508
		188.965	157.861	123.965
		134.033	115.137	105.654
		121.826	78.5156	111.758
		79.1016	84.6191	56.8262
		152.344	66.3086	93.4473
		121.826	109.033	69.0332
		134.033	72.4121	111.758
		72.998	90.7227	93.4473
		85.2051	72.4121	81.2402
		85.2051	84.6191	87.3438
		97.4121	90.7227	87.3438
		60.791	78.5156	172.793
		72.998	145.654	123.965
		79.1016	66.3086	75.1367
		103.516	72.4121	81.2402
		134.033	84.6191	93.4473
		97.4121	78.5156	117.861
		109.619	66.3086	69.0332
		134.033	102.93	81.2402
		85.2051	90.7227	87.3438
		109.619	66.3086	99.5508
		103.516	90.7227	136.172
		127.93	96.8262	99.5508
		103.516	96.8262	105.654
		66.8945	109.033	148.379
		54.6875	96.8262	142.275
		91.3086	121.24	123.965
		134.033	139.551	117.861
		164.551	163.965	56.8262
		79.1016	96.8262	136.172
		85.2051	84.6191	81.2402
		97.4121	109.033	123.965
		176.758	84.6191	62.9297
		91.3086	127.344	99.5508
		85.2051	182.275	87.3438
		115.723	66.3086	81.2402
		103.516	66.3086	56.8262
		134.033	78.5156	105.654
		103.516	133.447	93.4473
		91.3086	115.137	154.482
		85.2051	145.654	111.758
		109.619	109.033	81.2402
		85.2051	127.344	69.0332
		127.93	90.7227	87.3438
		127.93	96.8262	105.654
		85.2051	145.654	75.1367
		97.4121	72.4121	105.654
		103.516	60.2051	93.4473
		72.998	115.137	105.654
		91.3086	78.5156	111.758
		140.137	84.6191	69.0332
		121.826	96.8262	87.3438
		79.1016	90.7227	117.861
		127.93	72.4121	81.2402
		182.861	121.24	130.068
		97.4121	102.93	87.3438
		60.791	90.7227	75.1367
		85.2051	127.344	93.4473
		79.1016	78.5156	69.0332
		91.3086	139.551	93.4473
		85.2051	102.93	87.3438
		137.793	200	79.1699
		95.0684	90.1367	176.826
		125.586	96.2402	91.377
		64.5508	90.1367	127.998
		131.689	84.0332	115.791
		119.482	65.7227	97.4805
		113.379	77.9297	109.687
		76.7578	120.654	140.205
		88.9648	181.689	158.516
		131.689	84.0332	127.998
		137.793	65.7227	127.998
		125.586	71.8262	109.687
		82.8613	84.0332	66.9629
		113.379	65.7227	97.4805
		95.0684	102.344	115.791
		125.586	65.7227	97.4805
		64.5508	200	134.102
		119.482	169.482	97.4805
		119.482	65.7227	66.9629
		143.896	181.689	91.377
		150	96.2402	79.1699
		95.0684	193.896	134.102
		101.172	84.0332	115.791
		180.518	71.8262	103.584
		192.725	77.9297	115.791
		64.5508	96.2402	115.791
		64.5508	84.0332	97.4805
		113.379	59.6191	103.584
		113.379	65.7227	109.687
		70.6543	132.861	140.205
		174.414	138.965	109.687
		113.379	114.551	146.309
		101.172	126.758	195.137
		101.172	126.758	121.895
		101.172	108.447	103.584
		82.8613	157.275	146.309
		192.725	102.344	73.0664
		131.689	181.689	121.895
		186.621	90.1367	97.4805
		150	84.0332	85.2734
		101.172	90.1367	115.791
		150	108.447	115.791
		52.3437	96.2402	115.791
		88.9648	90.1367	140.205
		198.828	145.068	79.1699
		82.8613	96.2402	79.1699
		101.172	102.344	85.2734
		95.0684	114.551	109.687
		101.172	132.861	146.309
		76.7578	71.8262	164.619
		113.379	126.758	170.723
		131.689	71.8262	97.4805
		137.793	151.172	109.687
		137.793	108.447	134.102
		58.4473	132.861	91.377
		88.9648	120.654	97.4805
		70.6543	230.518	127.998
		95.0684	108.447	109.687
		88.9648	193.896	103.584
		131.689	96.2402	146.309
		82.8613	108.447	140.205
		150	126.758	91.377
		58.4473	126.758	91.377
		88.9648	120.654	115.791
		88.9648	102.344	115.791
		137.793	71.8262	97.4805
		95.0684	114.551	109.687
		113.379	132.861	85.2734
		113.379	90.1367	127.998
		76.7578	108.447	115.791
		52.3437	108.447	127.998
		131.689	65.7227	127.998
		64.5508	132.861	91.377
		95.0684	90.1367	152.412
		88.9648	96.2402	91.377
		235.449	84.0332	79.1699
		95.0684	114.551	91.377
		76.7578	126.758	91.377
		137.793	126.758	79.1699
		95.0684	108.447	121.895
		107.275	90.1367	146.309
		113.379	96.2402	146.309
		82.8613	90.1367	73.0664
		125.586	90.1367	134.102
		113.379	200	121.895
		88.9648	108.447	79.1699
		95.0684	151.172	127.998
		119.482	90.1367	140.205
		113.379	145.068	91.377
		113.379	96.2402	127.998
		101.172	77.9297	109.687
		137.793	90.1367	85.2734
		119.482	65.7227	73.0664
		143.896	187.793	127.998
		131.689	126.758	140.205
		119.482	120.654	109.687
		119.482	84.0332	127.998
		88.9648	77.9297	66.9629
		95.0684	175.586	85.2734
		101.172	90.1367	121.895
		97.7227
		103.826
		85.5156
		85.5156
		79.4121
		91.6191
		91.6191
		54.998
		42.791
		73.3086
		85.5156
		122.137
		61.1016
		61.1016
		61.1016
		61.1016
		85.5156
		67.2051
		73.3086
		140.447
		91.6191
		116.033
		67.2051
		67.2051
		116.033
		73.3086
		85.5156
		116.033
		61.1016
		67.2051
		48.8945
		67.2051
		73.3086
		134.344
		116.033
		67.2051
		91.6191
		116.033
		97.7227
		73.3086
		79.4121
		91.6191
		67.2051
		122.137
		109.93
		73.3086
		85.5156
		140.447
		128.24
		79.4121
		109.93
		73.3086
		140.447
		85.5156
		73.3086
		103.826
		128.24
		109.93
		91.6191
		79.4121
		103.826
		73.3086
		61.1016
		91.6191
		103.826
		85.5156
		152.654
		91.6191
		85.5156
		97.7227
		91.6191
		91.6191
		73.3086
		122.137
		128.24
		67.2051
		67.2051
		122.137
		73.3086
		97.7227
		134.344
		67.2051
		67.2051
		134.344
		61.1016
		61.1016
		85.5156
		85.5156
		85.5156
		54.998
		122.137
		91.6191
		140.447
		61.1016
		61.1016
		61.1016
		97.7227
		67.2051
		103.826
		85.5156
	Average	125.731	99.2631	113.446
Figure3-figure supplement 1D		mEPSC average amplitudes per cell (pA)
		WT (n=9)	Kv3.3 KO (n=8)	Kv3.1 KO (n=8)
		-136.534	-111.178	-114.103
		-138.451	-103.495	-95.9339
		-148.586	-93.1127	-79.8575
		-116.072	-82.3748	-124.835
		-139.014	-87.1205	-128.761
		-135.001	-98.495	-80.4835
		-104.174	-104.51	-133.422
		-103.349	-88.1228	-134.262
		-86.6611
	Average	-123.094	-96.0512	-111.457
	One-way ANOVA & Tukey’s multiple comparison		P= <0.0206 compared to WT	P= 0.4331 compared to WT
Figure3-figure supplement 1E		mEPSC frequency per cell in 1s
		WT (n=9)	Kv3.3 KO (n=8)	Kv3.1 KO (n=8)
		6.26667	3.8	9.36667
		9.93333	11.8667	10.5667
		12	15.5667	6.46667
		12.3667	7.76667	13.9667
		13.1	20.1333	13.3
		12.0333	15.8	10.9667
		25.3333	14.8333	14.4
		29.0667	10.1333	4.86667
		12.4333
	Average	14.7259	12.4875	10.4875
	Kruksal-Wallis test, not significant. P=0.5375
Figure3-figure supplement 1F		mEPSC rise time (10-90%) (ms)
		WT (n=9)	Kv3.3 KO (n=8)	Kv3.1 KO (n=8)
		0.110069	0.13642	0.108653
		0.086694	0.102044	0.0975034
		0.13329	0.106782	0.110561
		0.106431	0.0972537	0.088966
		0.114855	0.135759	0.0806696
		0.117544	0.134589	0.118648
		0.116312	0.0980413	0.13735
		0.0940491	0.154431	0.111732
		0.112473
	Average	0.110191	0.120665	0.10676
	One-way ANOVA, not significant. P=0.2899
Figure3-figure supplement 1G		mEPSC decay tau (ms)
		WT (n=9)	Kv3.3 KO (n=8)	Kv3.1 KO (n=8)
		0.222886	0.324421	0.236285
		0.287836	0.294789	0.430258
		0.297267	0.327563	0.281392
		0.268813	0.283144	0.138489
		0.223642	0.237318	0.21388
		0.223234	0.191257	0.314399
		0.221103	0.255884	0.204472
		0.19921	0.218618	0.295294
		0.228039
	Average	0.241337	0.266624	0.264309
	One-way ANOVA, not significant. P=0.4612
