# Supplementary material for: Kv3.3 subunits control presynaptic action potential waveform and neurotransmitter release at a central excitatory synapse
Source: eLife. 2022 May 5;11:e75219. doi: 10.7554/eLife.75219 (PMC9110028; doi:10.7554/eLife.75219)
Supplement: Figure 3—source data 1. [file elife-75219-fig3-data1.xlsx]

## Sheet: Figure 3
Figure 3B	Does the increase in action potential duration in Kv3.3KO animals lead to increased neurotransmitter release?		EPSC amplitude (nA)
			WT (n=21)	Kv3.3 KO (n=21)	Kv3.1 KO (n=17)
			-14.2514	-12.5573	-14.0132
			-14.9258	-15.0766	-10.7893
			-11.7889	-18.9988	-15.4105
			-14.6603	-15.0706	-15.8827
			-13.9415	-25.0425	-13.9425
			-13.2215	-27.684	-12.9287
			-15.5466	-19.1989	-15.9137
			-11.4279	-17.7681	-15.2456
			-12.36	-19.0241	-17.4023
			-14.6758	-17.2223	-13.6858
			-12.5121	-22.4287	-11.4514
			-14.8814	-16.7121	-17.3116
			-13.0395	-21.7867	-11.1016
			-11.8366	-14.1444	-11.728
			-11.5847	-14.1396	-15.222
			-15.4281	-12.378	-10.0988
			-12.7004	-17.6699	-12.1259
			-12.0489	-10.6498
			-10.8543	-13.7019
			-12.2476	-25.9242
			-10.8481	-19.3827
		Average	-13.0848	-17.9315	-13.7796
		One-way ANOVA & Tukey’s post hoc		P=<0.0001 Compared to WT	P=0.7795 Compared to WT
Figure 3C			EPSC rise time (10-90%) (ms)
			WT (n=21)	Kv3.3 KO (n=21)	Kv3.1 KO (n=17)
			0.161092	0.262356	0.183749
			0.182779	0.225188	0.170406
			0.173948	0.226459	0.195033
			0.163133	0.190549	0.187055
			0.186974	0.157107	0.170434
			0.178308	0.226164	0.16803
			0.161779	0.194216	0.168687
			0.164924	0.182887	0.177283
			0.162564	0.184335	0.156046
			0.17725	0.182507	0.166272
			0.146372	0.197231	0.179731
			0.156329	0.1716	0.153148
			0.16757	0.184454	0.154699
			0.170998	0.118547	0.157355
			0.17292	0.1082	0.151346
			0.156409	0.114359	0.159994
			0.175009	0.156738	0.162187
			0.175223	0.175255
			0.157652	0.203501
			0.162245	0.139923
			0.174436	0.193069
		Average	0.167996	0.180697	0.168321
		One way ANOVA P=0.1918
Figure 3D			EPSC decay tau (ms)
			WT (n=21)	Kv3.3 KO (n=21)	Kv3.1 KO (n=17)
			0.224051	0.248396	0.262761
			0.205637	0.281369	0.297406
			0.176666	0.313811	0.256281
			0.107771	0.213511	0.23734
			0.153408	0.222701	0.145114
			0.235283	0.400964	0.164779
			0.149655	0.304102	0.23868
			0.183256	0.270394	0.17682
			0.159803	0.220345	0.192467
			0.127391	0.184039	0.223281
			0.133414	0.214223	0.249903
			0.132914	0.157955	0.241001
			0.124997	0.283795	0.122567
			0.160341	0.156087	0.107448
			0.220008	0.196093	0.217063
			0.19168	0.184437	0.171971
			0.228382	0.174295	0.125288
			0.112852	0.19943
			0.143509	0.250645
			0.226532	0.151953
			0.162428	0.228815
		Average	0.169523	0.231303	0.201775
		One way ANOVA & Tukey’s post hoc		P=0.0012 Compared to WT	P=0.1635 Compared to WT
Figure 3E			Charge (nC)
			WT (n=21)	Kv3.3 KO (n=21)	Kv3.1 KO (n=17)
			-4.5611	-22.9619	-7.76233
			-6.72531	-10.7182	-8.40605
			-7.97279	-9.43351	-10.1005
			-2.554	-10.1533	-8.45212
			-4.68942	-5.12314	-4.26868
			-6.01483	-17.7318	-4.93517
			-4.95716	-11.3347	-9.11948
			-5.96071	-8.3255	-5.18631
			-6.09153	-7.26174	-4.72612
			-4.30682	-9.0802	-7.39608
			-4.14589	-13.9743	-7.85427
			-5.15219	-5.01613	-7.79719
			-3.92227	-10.6657	-4.77636
			-5.468	-13.5197	-5.69638
			-7.51806	-11.636	-7.08362
			-5.21906	-10.2144	-5.85626
			-8.29867	-3.7179	-3.9719
			-4.4692	-8.28265
			-5.2959	-14.044
			-7.43519	-6.02312
			-5.36583	-10.3127
		Average	-5.52971	-10.4538	-6.66993
		One way ANOVA & Tukey’s post hoc		P=<0.0001 Compared to WT	P=0.4686 Compared to WT
Figure 3G	Are there functional presynaptic Kv3 channels left in the Kv3.3 KO which can be blocked by TEA?		EPSC amplitude (nA)
			WT (n=9)	WT + TEA	Kv3.3 KO (n=6)	Kv3.3 KO + TEA	Kv3.1 KO (n=4)	Kv3.1 KO + TEA
			-9.30832	-19.392	-21.7867	-24.9835	-17.3116	-23.6414
			-13.0395	-18.4558	-14.1444	-14.9416	-16.0892	-23.1806
			-12.0489	-22.2145	-14.1396	-16.3254	-11.1016	-15.9641
			-12.2476	-15.3884	-12.378	-14.9413	-12.1259	-14.5085
			-10.8481	-15.3995	-25.876	-30.477
			-17.9645	-25.5987	-19.34	-20.886
			-8.61568	-17.6967
			-12.7262	-17.4496
			-13.936	-16.6385
		Average	-12.3039	-18.6926	-17.9441	-20.4258	-14.1571	-19.3237
Figure 3H			Fold change in EPSC amplitude with blockade by 1mM TEA
			WT (n=9)	Kv3.3 KO (n=6)	Kv3.1 KO (n=4)
			2.0833	1.14673	1.36564
			1.41538	1.05636	1.44076
			1.8437	1.15459	1.43799
			1.25644	1.20709	1.19649
			1.41956	1.178
			1.42497	1.07994
			2.05401
			1.37116
		Average	1.60856	1.13712	1.36022
		Kruksall-Wallis & Dunn’s multiple comparison		P=0.0031 Compared to WT	P=>0.9999 Compared to WT
