# Supplementary material for: Kv3.3 subunits control presynaptic action potential waveform and neurotransmitter release at a central excitatory synapse
Source: eLife. 2022 May 5;11:e75219. doi: 10.7554/eLife.75219 (PMC9110028; doi:10.7554/eLife.75219)
Supplement: Figure 4—source data 1. [file elife-75219-fig4-data1.xlsx]

## Sheet: Figure 4
Figure 4D	Does an elongated presynaptic AP in Kv3.3 KOs affect high frequency neurotransmission?		EPSC2/ EPSC1 ratio 100Hz				EPSC80/ EPSC1 ratio 100Hz
			WT (n=21)	Kv3.3 KO (n=21)	Kv3.1 KO (n=17)		WT (n=21)	Kv3.3 KO (n=21)	Kv3.1 KO (n=17)
			0.9444	0.788814	0.9946		0.658717	0.41589	0.826211
			0.9384	0.7432	0.889914		0.599252	0.369368	0.420964
			0.8452	0.7961	0.8648		0.350479	0.510889	0.422267
			0.9362	0.8949	0.9418		0.639557	0.25662	0.659718
			0.8789	0.6898	0.846261		0.599047	0.316052	0.35766
			0.84	0.76459	0.8807		0.399171	0.297089	0.411943
			0.9029	0.6914	0.9948		0.472069	0.276186	0.734812
			0.877638	0.733562	0.8356		0.447472	0.353544	0.506644
			0.9226	0.7219	0.8679		0.316444	0.308518	0.290556
			0.9076	0.6141	0.9376		0.377184	0.267455	0.501955
			0.810004	0.635	0.8138		0.309194	0.265331	0.300374
			0.856597	0.605019	0.9391		0.699791	0.525842	0.717276
			0.928384	0.808494	0.938644		0.371139	0.285444	0.381932
			0.951117	0.83286	0.928181		0.363859	0.263182	0.535365
			0.95606	0.859665	0.966161		0.499336	0.308887	0.78035
			0.915498	0.82615	0.983073		0.395702	0.327298	0.836212
			0.895427	0.662781	0.9491		0.280373	0.322684	0.709771
			0.871029	0.7656			0.272575	0.251733
			0.900244	0.655516			0.531143	0.236722
			0.9128	0.7334			0.490193	0.350288
			0.878245	0.841167			0.332377	0.282227
		Average	0.898535	0.745906	0.916002	Average	0.447861	0.323393	0.552589
		One-way ANOVA & Tukey’s post hoc		P=<0.0001 compared to WT	P=0.6729 compared to WT	Kruksall wallis & Dunn’s multiple comparison		P=0.0055 compared to WT	P=0.3862 compared to WT
			EPSC2/ EPSC1 ratio 200Hz				EPSC80/ EPSC1 ratio 200Hz
			WT (n=10)	Kv3.3 KO (n=9)	Kv3.1 KO (n=5)		WT (n=10)	Kv3.3 KO (n=9)	Kv3.1 KO (n=5)
			0.94727	0.772589	0.9367		0.591227	0.256043	0.586407
			0.86206	0.556895	0.937079		0.343349	0.170419	0.429041
			0.890743	0.633341	0.960286		0.30756	0.221065	0.705707
			0.921732	0.749356	0.986205		0.284257	0.226645	0.767283
			0.946373	0.783962	0.853412		0.326129	0.242413	0.290545
			0.865989	0.810845			0.329943	0.233903
			0.891923	0.572426			0.206874	0.202805
			0.887606	0.699403			0.418583	0.236583
			0.902176	0.795852			0.305106	0.195203
			0.888257				0.288396
		Average	0.900413	0.708297	0.934736	Average	0.340142	0.220564	0.555797
		One-way ANOVA & Tukey’s post hoc		P=<0.0001 compared to WT	P=0.6257 compared to WT	Kruksall wallis & Dunn’s multiple comparison		P=0.0148 Compared to WT	P=0.4897 Compared to WT
			EPSC2/ EPSC1 ratio 600Hz				EPSC2/ EPSC1 ratio 600Hz
			WT (n=10)	Kv3.3 KO (n=8)	Kv3.1 KO (n=5)		WT (n=10)	Kv3.3 KO (n=8)	Kv3.1 KO (n=5)
			0.911649	0.712886	0.897199		0.203641	0.074016	0.171239
			0.791867	0.374163	0.879832		0.16601	0.072357	0.076505
			0.804587	0.637626	0.988676		0.178823	0.090226	0.189011
			0.863628	0.722969	0.959629		0.110475	0.112268	0.253764
			0.855753	0.727835	0.800678		0.108953	0.097527	0.11667
			0.699221	0.781034			0.139613	0.107615
			0.816115	0.526195			0.180285	0.0940506
			0.648133	0.79463			0.084012	0.0897343
			0.857918				0.191295
			0.853374				0.149907
		Average	0.810225	0.659667	0.905203	Average	0.151301	0.0922242	0.161438
		One-way ANOVA & Tukey’s post hoc		P=0.0186 compared to WT	P=0.2534 compared to WT	One-way ANOVA & Tukey’s post hoc		P=0.0182 compared to WT	P=0.8963 compared to WT
Figure 4E			Normalised EPSC amplitudes 100Hz
		Stimulus number	WT (n=21)																					Average
		1	1	1	1	1	1	1	1	1	1	1	1	1	1	1	1	1	1	1	1	1	1	1
		2	0.945166	0.938122	0.844591	0.807511	0.936093	0.882226	0.83921	0.878929	0.903692	0.923733	0.908423	0.810671	0.95606	0.915498	0.895427	0.856597	0.928384	0.871029	0.900246	0.91279	0.878246	0.892031
		3	0.908977	0.863293	0.672433	0.710308	0.826751	0.721037	0.717895	0.80038	0.809433	0.789207	0.82876	0.691368	0.781458	0.811689	0.813152	0.786043	0.832614	0.696974	0.814436	0.81631	0.777984	0.78431
		4	0.859874	0.771588	0.567065	0.632872	0.81933	0.687038	0.630164	0.732844	0.718133	0.754944	0.740557	0.625079	0.700743	0.66207	0.736837	0.72244	0.784028	0.459396	0.725366	0.766974	0.707655	0.705
		5	0.874874	0.730955	0.553961	0.526114	0.763027	0.648619	0.578208	0.679562	0.648888	0.643679	0.684493	0.545566	0.642472	0.687863	0.715211	0.659164	0.703331	0.429306	0.696913	0.707472	0.575323	0.652143
		6	0.832659	0.71859	0.483504	0.481679	0.746372	0.627308	0.538426	0.628946	0.656468	0.639993	0.690751	0.52175	0.562179	0.589515	0.649564	0.585135	0.66682	0.39567	0.659913	0.693219	0.527724	0.614104
		7	0.780991	0.706677	0.485242	0.488032	0.732092	0.566145	0.515044	0.597779	0.64047	0.510497	0.62223	0.477563	0.536362	0.522103	0.62073	0.554579	0.58837	0.334477	0.63056	0.660727	0.486202	0.574137
		8	0.759513	0.697966	0.447599	0.506668	0.704418	0.570122	0.474922	0.576091	0.577395	0.474028	0.563021	0.434183	0.520451	0.497496	0.584783	0.480222	0.517784	0.350991	0.612566	0.603218	0.445354	0.5428
		9	0.759481	0.60963	0.389704	0.432854	0.679038	0.619571	0.457519	0.53555	0.516744	0.425571	0.540778	0.389139	0.501906	0.469091	0.606793	0.520417	0.42941	0.355449	0.602781	0.633318	0.443779	0.51993
		10	0.772615	0.702584	0.3795	0.426441	0.671547	0.507118	0.43519	0.527808	0.478401	0.408753	0.544738	0.378491	0.450695	0.462682	0.513369	0.474059	0.490167	0.30145	0.577815	0.575809	0.379639	0.498041
		11	0.737296	0.606532	0.380896	0.405185	0.68788	0.55669	0.413737	0.51312	0.498436	0.371879	0.454316	0.311267	0.443108	0.445908	0.568924	0.49714	0.481367	0.26751	0.573879	0.580095	0.361747	0.483662
		12	0.741598	0.595282	0.376026	0.399531	0.658334	0.556185	0.399448	0.489957	0.464784	0.347133	0.463845	0.352532	0.413077	0.446066	0.525095	0.451699	0.427912	0.270549	0.534517	0.532054	0.370074	0.467414
		13	0.807003	0.578736	0.371203	0.381275	0.633936	0.603979	0.417065	0.503074	0.458856	0.386755	0.415479	0.378907	0.391897	0.351357	0.496453	0.435635	0.428099	0.31766	0.539015	0.529662	0.372662	0.466605
		14	0.704231	0.582564	0.389623	0.371163	0.653934	0.530707	0.397715	0.495278	0.45751	0.366455	0.403073	0.310401	0.432992	0.415842	0.486168	0.453142	0.3797	0.249881	0.564769	0.617072	0.319212	0.456259
		15	0.738639	0.558867	0.3328	0.371106	0.625426	0.536749	0.385981	0.495234	0.396227	0.364603	0.432014	0.323813	0.366502	0.374936	0.548067	0.467436	0.450755	0.270651	0.520684	0.540526	0.337103	0.449434
		16	0.688711	0.54612	0.329473	0.343911	0.662887	0.558365	0.388042	0.485679	0.43222	0.337138	0.347519	0.363331	0.401064	0.427947	0.531343	0.423111	0.435963	0.267611	0.536091	0.509629	0.306834	0.443952
		17	0.711634	0.562908	0.325313	0.35026	0.609964	0.522131	0.386429	0.454199	0.386812	0.362775	0.460741	0.344345	0.369453	0.369634	0.491262	0.393276	0.400295	0.252921	0.533504	0.535044	0.314373	0.435108
		18	0.732763	0.546668	0.321768	0.408558	0.651073	0.564639	0.372069	0.435351	0.364525	0.349139	0.333328	0.344212	0.360391	0.37454	0.513561	0.408292	0.413589	0.279363	0.558921	0.508433	0.332827	0.436858
		19	0.647917	0.565709	0.338305	0.365439	0.599161	0.571202	0.392302	0.468336	0.380918	0.340414	0.419215	0.330317	0.376407	0.389969	0.512792	0.407833	0.413027	0.272474	0.519447	0.511423	0.323713	0.435539
		20	0.726146	0.454817	0.3419	0.367369	0.640908	0.57387	0.392284	0.48638	0.388024	0.345467	0.376728	0.318657	0.352804	0.373116	0.476749	0.419111	0.404134	0.272272	0.488182	0.522586	0.353982	0.432166
		21	0.727145	0.551568	0.299446	0.365462	0.615586	0.484204	0.401385	0.469575	0.434427	0.348374	0.412933	0.313931	0.373035	0.370505	0.515484	0.424947	0.403759	0.261532	0.540477	0.505243	0.321687	0.435272
		22	0.740614	0.518985	0.325362	0.354439	0.656533	0.50918	0.38496	0.438902	0.433876	0.334246	0.476714	0.325496	0.370928	0.356975	0.525287	0.442257	0.3621	0.288279	0.520571	0.508333	0.331139	0.438342
		23	0.662784	0.565026	0.331276	0.390691	0.65898	0.526194	0.382461	0.432217	0.371548	0.312138	0.382111	0.308813	0.393056	0.346689	0.463197	0.415439	0.388781	0.283213	0.49493	0.50933	0.333052	0.426282
		24	0.682304	0.606301	0.328032	0.424776	0.641483	0.539689	0.380452	0.476397	0.407646	0.345465	0.439926	0.346405	0.366924	0.379287	0.506449	0.393079	0.39833	0.276932	0.542389	0.530759	0.340592	0.44541
		25	0.737078	0.601007	0.378907	0.379049	0.618469	0.506491	0.408094	0.452944	0.391177	0.326841	0.31836	0.355782	0.336471	0.367023	0.511254	0.480682	0.386908	0.274906	0.5461	0.483516	0.296931	0.436095
		26	0.686943	0.554618	0.31644	0.391724	0.665041	0.520744	0.385802	0.464303	0.373719	0.321048	0.52766	0.311845	0.382097	0.386567	0.514811	0.430192	0.419861	0.280275	0.546438	0.505343	0.380089	0.445979
		27	0.647343	0.560533	0.376071	0.353552	0.629795	0.513676	0.39952	0.455986	0.462563	0.318227	0.330662	0.298548	0.353542	0.386408	0.444358	0.452289	0.3973	0.269637	0.519222	0.542121	0.352295	0.431602
		28	0.632019	0.538521	0.318449	0.36563	0.631856	0.541926	0.397447	0.476358	0.422142	0.327893	0.427107	0.341449	0.363025	0.379762	0.459929	0.436684	0.357326	0.291724	0.546663	0.583882	0.316398	0.436009
		29	0.69471	0.491395	0.389295	0.38764	0.617272	0.54139	0.398882	0.453929	0.385794	0.330842	0.448315	0.318693	0.366818	0.3872	0.528459	0.377801	0.409938	0.286354	0.535079	0.531357	0.315611	0.437942
		30	0.71856	0.471776	0.354882	0.367672	0.603931	0.584296	0.394713	0.483577	0.424006	0.31097	0.404265	0.335515	0.37567	0.341467	0.524038	0.435044	0.385691	0.272272	0.518659	0.586274	0.330577	0.439231
		31	0.675699	0.542055	0.337443	0.364171	0.56778	0.518116	0.383237	0.433439	0.452037	0.311489	0.373628	0.323318	0.385259	0.351436	0.500586	0.453142	0.410874	0.276932	0.518322	0.502851	0.335303	0.429387
		32	0.740347	0.515682	0.375673	0.392796	0.648488	0.535788	0.398628	0.497251	0.416592	0.320613	0.395112	0.308724	0.375038	0.389178	0.469348	0.460617	0.397206	0.253427	0.492231	0.535941	0.343968	0.441078
		33	0.703525	0.580517	0.35284	0.385613	0.653981	0.56558	0.395556	0.480033	0.434799	0.341775	0.357398	0.323277	0.39274	0.429767	0.501835	0.428422	0.468261	0.264065	0.554985	0.559563	0.33339	0.452758
		34	0.751231	0.488001	0.336009	0.376265	0.659707	0.502192	0.398854	0.437518	0.473187	0.318326	0.442456	0.349265	0.343321	0.384351	0.534706	0.407964	0.39421	0.269131	0.520796	0.50634	0.316398	0.438582
		35	0.65174	0.565295	0.344278	0.366216	0.660672	0.51083	0.388977	0.471813	0.450855	0.346543	0.402844	0.366146	0.363025	0.351436	0.472328	0.393407	0.374925	0.275817	0.538003	0.485808	0.340029	0.434333
		36	0.752738	0.543305	0.374996	0.360042	0.652981	0.549475	0.394963	0.460706	0.411432	0.319494	0.407518	0.335686	0.381781	0.363542	0.457814	0.437077	0.420423	0.246741	0.490206	0.47026	0.298394	0.434742
		37	0.749604	0.502271	0.351882	0.377986	0.678043	0.528961	0.39211	0.46028	0.440504	0.334431	0.35162	0.32276	0.36429	0.385934	0.463966	0.420422	0.413683	0.271968	0.531143	0.503051	0.305258	0.435722
		38	0.710934	0.60654	0.370267	0.354062	0.663004	0.557375	0.395551	0.482632	0.409435	0.302442	0.428561	0.352302	0.348062	0.35745	0.473097	0.445864	0.417614	0.307427	0.540927	0.527968	0.33294	0.446879
		39	0.727009	0.620517	0.331826	0.353212	0.64552	0.525294	0.387178	0.486263	0.379816	0.279203	0.476943	0.341153	0.355438	0.373828	0.563733	0.450847	0.425291	0.288887	0.528668	0.499861	0.36276	0.447774
		40	0.672751	0.588286	0.368626	0.375131	0.607579	0.51297	0.393124	0.476281	0.397279	0.318023	0.352125	0.340285	0.360602	0.394004	0.549604	0.44429	0.444857	0.261735	0.508763	0.552586	0.312798	0.439605
		41	0.722674	0.555597	0.341899	0.381783	0.668001	0.553151	0.390083	0.520033	0.41946	0.367452	0.413149	0.340002	0.412971	0.385775	0.486937	0.427701	0.312764	0.278148	0.520796	0.543516	0.348131	0.447144
		42	0.706275	0.520826	0.343192	0.346776	0.674179	0.583682	0.406348	0.44717	0.374988	0.291474	0.382372	0.313397	0.367451	0.416	0.512216	0.377277	0.315386	0.292838	0.534517	0.495476	0.35477	0.431267
		43	0.688342	0.55338	0.360399	0.399808	0.650669	0.567847	0.383395	0.49394	0.354517	0.333799	0.347942	0.297023	0.379042	0.383085	0.453778	0.438847	0.430908	0.248868	0.527544	0.487602	0.323713	0.433545
		44	0.720542	0.588868	0.37377	0.391685	0.646716	0.515558	0.38684	0.453201	0.407292	0.321802	0.506356	0.298565	0.36998	0.36821	0.435612	0.445601	0.46021	0.282403	0.547562	0.526074	0.327876	0.446415
		45	0.715525	0.562049	0.33343	0.361768	0.666987	0.481896	0.403524	0.491589	0.457678	0.329991	0.44461	0.331767	0.382835	0.378734	0.487226	0.437143	0.406381	0.255555	0.539802	0.486306	0.365348	0.443816
		46	0.709706	0.577692	0.347826	0.378192	0.637535	0.515204	0.395319	0.483015	0.413106	0.330948	0.461269	0.359027	0.369031	0.349854	0.480882	0.443044	0.403946	0.2899	0.528219	0.570826	0.371762	0.448395
		47	0.715932	0.620667	0.336094	0.348697	0.624804	0.600183	0.395479	0.448462	0.472404	0.32387	0.359394	0.289811	0.347957	0.364254	0.531631	0.440487	0.447384	0.294763	0.544301	0.545211	0.359384	0.448151
		48	0.707636	0.55514	0.343025	0.360746	0.655319	0.529386	0.401837	0.494397	0.417416	0.345677	0.425617	0.32327	0.372087	0.369318	0.487802	0.444946	0.319037	0.259101	0.529906	0.498267	0.349931	0.437612
		49	0.731391	0.560836	0.31867	0.375793	0.632334	0.551677	0.407476	0.483839	0.358307	0.349038	0.451526	0.312508	0.368715	0.392105	0.531535	0.449863	0.325683	0.272575	0.508425	0.48232	0.355895	0.439072
		50	0.709826	0.59217	0.351804	0.390049	0.655945	0.535651	0.396356	0.444671	0.43818	0.329567	0.371243	0.371201	0.405701	0.360298	0.495299	0.480878	0.474252	0.285138	0.514048	0.48511	0.329902	0.448442
		51	0.733804	0.539374	0.330149	0.358578	0.686605	0.591058	0.394509	0.475713	0.360704	0.29686	0.390613	0.343601	0.399168	0.410303	0.510101	0.413209	0.317726	0.284936	0.53148	0.523184	0.331027	0.439176
		52	0.680019	0.62903	0.308695	0.382905	0.666162	0.507679	0.38487	0.464033	0.460647	0.34149	0.396254	0.308004	0.353858	0.384114	0.520578	0.405275	0.404321	0.262242	0.514723	0.536041	0.307396	0.438968
		53	0.722124	0.536657	0.335557	0.378313	0.602202	0.583744	0.386901	0.430505	0.503848	0.36807	0.411779	0.32299	0.374932	0.365204	0.501258	0.445929	0.428567	0.254643	0.493693	0.582586	0.368836	0.44754
		54	0.707759	0.585029	0.335637	0.338686	0.627288	0.586828	0.396852	0.472274	0.459765	0.315055	0.38596	0.33013	0.376513	0.35927	0.511831	0.45347	0.389342	0.276324	0.535641	0.475642	0.36591	0.442153
		55	0.669088	0.621034	0.324792	0.396076	0.640162	0.484457	0.393314	0.474534	0.421612	0.326582	0.386133	0.342406	0.365449	0.368448	0.433786	0.482845	0.400483	0.297904	0.538678	0.474844	0.354433	0.437955
		56	0.723892	0.581012	0.329457	0.378238	0.636498	0.553232	0.387152	0.488827	0.434697	0.395751	0.405732	0.332718	0.363657	0.407297	0.554218	0.450847	0.355173	0.257075	0.541939	0.502652	0.360171	0.449535
		57	0.708615	0.642814	0.369447	0.38004	0.641087	0.566307	0.384953	0.487801	0.40456	0.302307	0.373229	0.32748	0.357757	0.396852	0.504815	0.439765	0.302654	0.293041	0.527544	0.534347	0.329902	0.441682
		58	0.693589	0.610767	0.31663	0.354015	0.668146	0.54514	0.3882	0.471933	0.407389	0.353646	0.457399	0.349871	0.359232	0.420826	0.428403	0.44029	0.432406	0.265382	0.518997	0.491888	0.31426	0.442305
		59	0.699456	0.571993	0.359727	0.364107	0.61349	0.551227	0.373329	0.47312	0.438802	0.344999	0.401186	0.324772	0.357967	0.383402	0.491935	0.45747	0.335513	0.282605	0.519334	0.526672	0.342955	0.438765
		60	0.71498	0.61597	0.369298	0.369858	0.612839	0.555116	0.398497	0.447427	0.460152	0.321827	0.442026	0.296934	0.393267	0.375331	0.492896	0.427635	0.27279	0.263052	0.52372	0.510227	0.349594	0.438735
		61	0.712434	0.600072	0.359891	0.38898	0.633741	0.506684	0.390669	0.453348	0.470782	0.34034	0.346232	0.327299	0.370401	0.362039	0.387939	0.420881	0.367062	0.274196	0.511799	0.489396	0.360734	0.432139
		62	0.702897	0.538461	0.357574	0.409933	0.619428	0.573307	0.373569	0.470985	0.405036	0.31979	0.386083	0.32518	0.388736	0.355867	0.522692	0.409275	0.421734	0.274399	0.504939	0.513715	0.336766	0.438589
		63	0.687455	0.584211	0.320252	0.388909	0.68047	0.562218	0.389993	0.477817	0.444413	0.346365	0.415756	0.32278	0.346798	0.365995	0.478767	0.408685	0.453469	0.261127	0.5082	0.49438	0.298844	0.439853
		64	0.712956	0.586523	0.359573	0.334352	0.653057	0.535853	0.400182	0.4928	0.342056	0.332525	0.351066	0.36116	0.403277	0.38625	0.474731	0.460617	0.330739	0.258797	0.522933	0.512121	0.343517	0.435956
		65	0.64782	0.597126	0.345064	0.390846	0.603199	0.566565	0.392098	0.483456	0.428391	0.372078	0.462134	0.33209	0.388631	0.383323	0.505199	0.417209	0.313045	0.270043	0.50269	0.53923	0.361747	0.442952
		66	0.713803	0.551665	0.354283	0.412245	0.634325	0.56429	0.384173	0.459708	0.391141	0.353158	0.435667	0.369342	0.373668	0.378021	0.468291	0.445667	0.337573	0.277945	0.571742	0.516805	0.331364	0.444042
		67	0.695492	0.597762	0.352472	0.35646	0.637992	0.554476	0.391397	0.485474	0.468204	0.349086	0.450253	0.37879	0.382097	0.356025	0.46387	0.418455	0.429036	0.270752	0.532942	0.543716	0.354658	0.450924
		68	0.69922	0.564114	0.346548	0.36917	0.642002	0.565096	0.398264	0.499915	0.373251	0.361287	0.45273	0.299567	0.394531	0.353335	0.498856	0.450388	0.448976	0.267206	0.491781	0.483117	0.331364	0.442415
		69	0.716847	0.565922	0.366931	0.338568	0.647887	0.558976	0.378892	0.455677	0.417958	0.346618	0.450614	0.305607	0.364816	0.405319	0.493473	0.436159	0.383538	0.277033	0.512924	0.486605	0.34498	0.440731
		70	0.715332	0.591511	0.341729	0.368274	0.596111	0.524932	0.384675	0.487509	0.409628	0.339683	0.374639	0.357954	0.375881	0.366628	0.476269	0.403636	0.363411	0.293851	0.501452	0.475642	0.354995	0.433512
		71	0.731245	0.612424	0.346062	0.380257	0.623912	0.570062	0.382821	0.488246	0.410368	0.372079	0.301541	0.337428	0.330571	0.39796	0.439649	0.450716	0.391215	0.279465	0.526419	0.525675	0.365348	0.441117
		72	0.7347	0.542014	0.348784	0.356256	0.668309	0.54669	0.393141	0.496301	0.439416	0.368699	0.342378	0.333877	0.373035	0.400413	0.430325	0.417668	0.28159	0.25981	0.499203	0.526672	0.327426	0.4327
		73	0.711921	0.563678	0.382355	0.379441	0.650857	0.546301	0.391737	0.471537	0.448062	0.344235	0.376883	0.339429	0.368715	0.32588	0.451951	0.466781	0.305369	0.279769	0.505951	0.553383	0.356345	0.439075
		74	0.700223	0.576943	0.358664	0.362635	0.657632	0.53379	0.396104	0.442864	0.454033	0.293763	0.326714	0.330358	0.375986	0.351199	0.498567	0.42252	0.238714	0.275311	0.511237	0.510127	0.337441	0.42642
		75	0.704102	0.627475	0.335181	0.381172	0.598673	0.556656	0.38962	0.490633	0.479833	0.325499	0.392449	0.349957	0.366818	0.367498	0.452336	0.465666	0.274475	0.276425	0.537666	0.513616	0.332827	0.43898
		76	0.677454	0.599032	0.377997	0.378629	0.633806	0.492899	0.372128	0.458984	0.406309	0.345893	0.368719	0.339015	0.368715	0.35199	0.469829	0.419176	0.317258	0.302361	0.528444	0.530161	0.402707	0.43531
		77	0.71721	0.491051	0.341533	0.368964	0.660556	0.55271	0.3746	0.492477	0.428082	0.375444	0.41688	0.345597	0.329095	0.370426	0.423597	0.427832	0.267173	0.264065	0.526419	0.462984	0.320224	0.42652
		78	0.662383	0.601654	0.317572	0.376622	0.648397	0.558749	0.383532	0.449611	0.388388	0.327343	0.391379	0.322843	0.379252	0.364333	0.510678	0.404948	0.298441	0.262849	0.512024	0.54242	0.363322	0.43175
		79	0.690765	0.503235	0.376402	0.365152	0.637953	0.536861	0.373452	0.465868	0.375427	0.32054	0.384938	0.320328	0.406755	0.352465	0.459641	0.436487	0.369589	0.255555	0.509325	0.498964	0.33339	0.42729
		80	0.658717	0.599252	0.350479	0.377119	0.639557	0.599047	0.399171	0.472069	0.447472	0.316444	0.377184	0.309194	0.371139	0.363859	0.499336	0.395702	0.280373	0.272575	0.531143	0.490193	0.332377	0.432495
			Kv3.3 KO (n=21)
		1	1	1	1	1	1	1	1	1	1	1	1	1	1	1	1	1	1	1	1	1	1	1
		2	0.788814	0.743231	0.796061	0.68975	0.89748	0.764681	0.692017	0.73426	0.722469	0.330266	0.614051	0.635932	0.82615	0.662781	0.605019	0.808494	0.83286	0.859665	0.765604	0.733438	0.841167	0.730676
		3	0.681639	0.634332	0.719388	0.547955	0.752715	0.61749	0.612819	0.628709	0.60962	0.214693	0.499123	0.480501	0.724908	0.54174	0.453879	0.605423	0.666498	0.616964	0.527377	0.639923	0.709036	0.594511
		4	0.579811	0.545471	0.653525	0.449308	0.602825	0.536317	0.490344	0.548056	0.529304	0.205515	0.405145	0.387856	0.665116	0.440757	0.38684	0.516445	0.590612	0.488364	0.4243	0.564065	0.638374	0.507064
		5	0.56049	0.520169	0.618618	0.436129	0.55118	0.475712	0.43257	0.499875	0.483079	0.157216	0.381467	0.362272	0.636031	0.376569	0.34252	0.437392	0.553402	0.419627	0.323361	0.500968	0.508826	0.45607
		6	0.507996	0.487377	0.565825	0.404844	0.500564	0.442289	0.413825	0.478512	0.433971	0.142654	0.319755	0.30786	0.619969	0.359261	0.298453	0.41012	0.472941	0.374163	0.292804	0.480155	0.416057	0.415685
		7	0.499005	0.473208	0.540229	0.34645	0.452132	0.389453	0.369276	0.450672	0.388453	0.147318	0.328039	0.289952	0.579832	0.33519	0.289404	0.39122	0.399644	0.385801	0.29022	0.461226	0.348418	0.38834
		8	0.459999	0.432219	0.542482	0.325622	0.390808	0.405246	0.355525	0.412133	0.377745	0.129879	0.29616	0.304854	0.554581	0.31387	0.275733	0.343753	0.366665	0.344676	0.247457	0.414515	0.340231	0.363531
		9	0.436911	0.442036	0.517207	0.330537	0.416735	0.34639	0.306942	0.398283	0.360525	0.139216	0.282912	0.277012	0.545566	0.289226	0.25587	0.362567	0.340075	0.350298	0.255475	0.355609	0.303073	0.348213
		10	0.442622	0.435458	0.528986	0.31389	0.411769	0.310976	0.313697	0.386145	0.351394	0.126558	0.286273	0.256848	0.502872	0.325676	0.224634	0.308283	0.324881	0.318542	0.251822	0.377646	0.266671	0.336459
		11	0.440678	0.434648	0.476514	0.292804	0.402239	0.302074	0.295495	0.351038	0.360923	0.154304	0.262244	0.270442	0.497173	0.27444	0.244132	0.32071	0.322377	0.285012	0.253871	0.39116	0.268182	0.328593
		12	0.410421	0.375745	0.49836	0.26363	0.374987	0.274845	0.26326	0.347814	0.355898	0.153421	0.28864	0.248779	0.53959	0.27742	0.263434	0.308196	0.328852	0.310258	0.244606	0.410372	0.261129	0.323793
		13	0.42804	0.44325	0.537766	0.241992	0.398147	0.29177	0.288986	0.350943	0.349394	0.131997	0.29237	0.30247	0.505877	0.279827	0.265227	0.301551	0.365198	0.273473	0.276411	0.351465	0.258735	0.330233
		14	0.425611	0.435154	0.504142	0.258794	0.36157	0.343025	0.287151	0.3572	0.340059	0.149851	0.297003	0.28472	0.51054	0.283037	0.28946	0.315014	0.332996	0.261935	0.257702	0.416116	0.238456	0.33093
		15	0.432294	0.435052	0.509176	0.259807	0.333449	0.329354	0.263964	0.359421	0.345897	0.14262	0.313075	0.296536	0.515376	0.270772	0.286939	0.312425	0.375903	0.283434	0.245408	0.382543	0.275362	0.331848
		16	0.440435	0.439303	0.56422	0.267113	0.318886	0.294261	0.255777	0.356226	0.354839	0.145595	0.306454	0.296563	0.524357	0.275242	0.3054	0.306988	0.385313	0.283335	0.263226	0.378211	0.260877	0.334411
		17	0.461214	0.434344	0.516243	0.22638	0.299462	0.308501	0.264369	0.371754	0.354531	0.148436	0.284698	0.295735	0.506672	0.297365	0.260521	0.3548	0.363989	0.277615	0.286567	0.401943	0.276748	0.332947
		18	0.435332	0.459342	0.516243	0.269708	0.348219	0.284964	0.260746	0.357865	0.338102	0.14632	0.301712	0.275491	0.552267	0.286475	0.297416	0.355749	0.360536	0.320909	0.268304	0.423933	0.265285	0.339282
		19	0.440314	0.432826	0.553509	0.257865	0.307075	0.301549	0.258105	0.367162	0.343227	0.156533	0.323614	0.292775	0.520765	0.289226	0.287107	0.348759	0.393774	0.286097	0.240864	0.363567	0.269568	0.334966
		20	0.470813	0.428272	0.526202	0.254454	0.279644	0.309075	0.256956	0.363016	0.340138	0.154228	0.296257	0.299752	0.529849	0.304586	0.259988	0.28524	0.349744	0.321994	0.265809	0.391631	0.240031	0.329889
		21	0.448212	0.446489	0.494612	0.224455	0.317825	0.331873	0.252139	0.362917	0.356093	0.138112	0.292466	0.284503	0.523494	0.315819	0.284221	0.32399	0.330838	0.30158	0.233381	0.369971	0.251745	0.327845
		22	0.451128	0.437178	0.521705	0.266069	0.333519	0.316048	0.245601	0.354162	0.349519	0.14628	0.299642	0.288775	0.532682	0.305044	0.28523	0.336072	0.361313	0.319923	0.303762	0.407829	0.266923	0.339448
		23	0.434845	0.439506	0.500502	0.278289	0.326343	0.311415	0.265949	0.356264	0.33519	0.143844	0.293585	0.266656	0.516654	0.299886	0.293746	0.303105	0.358723	0.304243	0.271511	0.401566	0.269253	0.331956
		24	0.445174	0.435255	0.525881	0.278753	0.304447	0.30953	0.299363	0.377572	0.332952	0.145743	0.287332	0.263847	0.530747	0.325676	0.266824	0.314928	0.360968	0.309568	0.253871	0.386545	0.286194	0.335294
		25	0.448698	0.432219	0.52149	0.289165	0.282561	0.321714	0.303871	0.374387	0.36402	0.150857	0.28702	0.284691	0.510471	0.258164	0.278758	0.331498	0.317197	0.328207	0.262157	0.408441	0.271331	0.334615
		26	0.464495	0.409042	0.500716	0.26925	0.306546	0.324844	0.286667	0.386266	0.328028	0.143125	0.292445	0.285533	0.526153	0.319257	0.27436	0.34125	0.376594	0.311738	0.234182	0.387911	0.288336	0.336035
		27	0.449305	0.405196	0.514209	0.24701	0.349273	0.288056	0.255596	0.38743	0.342556	0.152216	0.284159	0.286994	0.514616	0.324186	0.303607	0.335123	0.383932	0.297438	0.238013	0.370818	0.268875	0.333267
		28	0.448334	0.431611	0.49836	0.27935	0.299648	0.33323	0.252786	0.392526	0.350875	0.160927	0.272615	0.278314	0.524564	0.289112	0.291281	0.30345	0.364766	0.310751	0.299307	0.408582	0.264026	0.335925
		29	0.443837	0.429385	0.5171	0.276079	0.301612	0.284865	0.287804	0.364275	0.340761	0.146327	0.274613	0.282246	0.541594	0.270199	0.267048	0.300084	0.352766	0.310456	0.246922	0.387864	0.267112	0.328236
		30	0.447969	0.41643	0.523311	0.275602	0.303319	0.317279	0.270955	0.378016	0.342408	0.143566	0.288166	0.264223	0.510644	0.299542	0.286967	0.325802	0.387299	0.285899	0.254851	0.432691	0.283612	0.335169
		31	0.434237	0.397808	0.510032	0.262999	0.389984	0.306114	0.294114	0.376475	0.333785	0.131213	0.288766	0.28245	0.506292	0.272606	0.276601	0.342977	0.380133	0.287477	0.26082	0.370724	0.269379	0.332142
		32	0.435696	0.417645	0.49065	0.279422	0.296461	0.338519	0.26741	0.355934	0.324877	0.12558	0.296115	0.283006	0.510471	0.27891	0.272035	0.302932	0.384795	0.299706	0.311334	0.337951	0.262829	0.327251
		33	0.448212	0.406613	0.515387	0.274963	0.297688	0.312404	0.300714	0.386015	0.333302	0.133463	0.28719	0.276275	0.508641	0.306764	0.283521	0.369126	0.37927	0.322684	0.260642	0.392431	0.257161	0.335832
		34	0.435575	0.43151	0.504571	0.275869	0.301698	0.343587	0.264958	0.361941	0.347273	0.149147	0.287625	0.279587	0.551231	0.273752	0.278002	0.333656	0.332046	0.326826	0.242557	0.348452	0.275866	0.330749
		35	0.434845	0.410459	0.514316	0.28065	0.30403	0.303916	0.27897	0.36038	0.350194	0.137648	0.291861	0.28555	0.538899	0.30172	0.268337	0.317604	0.357169	0.284617	0.252	0.37209	0.290603	0.330279
		36	0.445903	0.426855	0.513459	0.275694	0.320123	0.309741	0.27344	0.366254	0.347617	0.142451	0.274945	0.268162	0.508675	0.326479	0.265872	0.323817	0.367615	0.309174	0.232401	0.370677	0.270576	0.330473
		37	0.431321	0.397504	0.499109	0.270269	0.336347	0.313121	0.276538	0.361291	0.332384	0.148546	0.287575	0.278301	0.493373	0.308712	0.2824	0.31674	0.301743	0.302073	0.251288	0.410843	0.274228	0.327319
		38	0.441529	0.425539	0.50607	0.280277	0.290358	0.327884	0.263931	0.360716	0.342386	0.154943	0.294668	0.294629	0.541524	0.330605	0.277077	0.318812	0.389803	0.316471	0.242022	0.330323	0.279078	0.333745
		39	0.438126	0.399933	0.493755	0.273016	0.328391	0.324147	0.290132	0.351717	0.333096	0.149836	0.287612	0.251738	0.501663	0.290946	0.295931	0.314669	0.392997	0.288759	0.265453	0.373832	0.271961	0.329415
		40	0.446632	0.421693	0.497717	0.248811	0.309447	0.323361	0.266138	0.369366	0.330368	0.154402	0.288457	0.268927	0.51168	0.3337	0.258868	0.329859	0.336104	0.315781	0.265186	0.356551	0.279456	0.329167
		41	0.434602	0.390926	0.484546	0.264605	0.283294	0.35448	0.251867	0.358367	0.322699	0.137272	0.269581	0.251787	0.507052	0.291633	0.256655	0.314497	0.320046	0.33797	0.247279	0.350194	0.260121	0.318546
		42	0.412487	0.409852	0.512602	0.245996	0.330377	0.31181	0.267168	0.362434	0.322607	0.119019	0.256312	0.285635	0.510057	0.283037	0.289824	0.327787	0.360622	0.303158	0.299129	0.38631	0.275488	0.327224
		43	0.434359	0.420985	0.510461	0.290761	0.324518	0.311354	0.2595	0.371306	0.346587	0.133257	0.274683	0.272817	0.497138	0.274899	0.282204	0.324939	0.36796	0.298819	0.249684	0.354338	0.245195	0.325989
		44	0.450763	0.419365	0.511639	0.264685	0.329591	0.321346	0.242976	0.368901	0.335309	0.139404	0.268923	0.26106	0.494927	0.284527	0.277386	0.323213	0.369601	0.33156	0.251288	0.362107	0.28928	0.328469
		45	0.438613	0.423616	0.54805	0.24706	0.335203	0.310775	0.291554	0.341888	0.329589	0.151198	0.275345	0.281823	0.482389	0.322123	0.260072	0.319157	0.356047	0.31016	0.254228	0.371713	0.259869	0.32907
		46	0.427676	0.394164	0.520099	0.275178	0.364904	0.304612	0.284676	0.364085	0.323388	0.146025	0.260069	0.26149	0.511162	0.306649	0.261221	0.335037	0.335327	0.332053	0.296902	0.354997	0.293248	0.331093
		47	0.453437	0.394164	0.490436	0.257376	0.341564	0.324544	0.262018	0.350969	0.334684	0.140234	0.281768	0.281608	0.514167	0.29427	0.263854	0.353247	0.365888	0.294479	0.261355	0.332254	0.266167	0.326594
		48	0.459634	0.405905	0.472874	0.255154	0.279999	0.300206	0.273873	0.35039	0.328053	0.147118	0.277051	0.273871	0.507812	0.291748	0.257551	0.348759	0.352939	0.303651	0.246299	0.35316	0.270513	0.321741
		49	0.447726	0.418758	0.52877	0.279848	0.362461	0.323069	0.278507	0.367471	0.325418	0.15103	0.284917	0.2545	0.532095	0.29576	0.255674	0.323472	0.383759	0.308187	0.252357	0.384756	0.277251	0.335037
		50	0.421965	0.391027	0.490543	0.266843	0.31705	0.337134	0.237037	0.348932	0.32204	0.139537	0.274203	0.265758	0.523735	0.300459	0.288171	0.317776	0.370205	0.329982	0.232757	0.324484	0.275866	0.322643
		51	0.435453	0.408941	0.484225	0.258981	0.376487	0.300451	0.271949	0.362179	0.335098	0.143332	0.273974	0.287259	0.510506	0.302179	0.274864	0.355318	0.33619	0.335406	0.289062	0.342472	0.25672	0.330526
		52	0.43764	0.414609	0.475444	0.300933	0.329741	0.304274	0.256599	0.346205	0.318151	0.13517	0.257443	0.257258	0.533096	0.26676	0.270046	0.338489	0.360622	0.3073	0.242913	0.343319	0.297846	0.323517
		53	0.412851	0.371898	0.457132	0.267235	0.370147	0.30525	0.294577	0.364998	0.34656	0.144287	0.278615	0.276885	0.518485	0.271689	0.270858	0.367659	0.360018	0.333631	0.260464	0.373691	0.244817	0.328178
		54	0.436182	0.41471	0.519135	0.258885	0.342628	0.308364	0.253727	0.350512	0.329662	0.148728	0.268292	0.251196	0.522043	0.283037	0.280663	0.324163	0.374004	0.297734	0.233648	0.344779	0.284368	0.32507
		55	0.451979	0.407625	0.517314	0.2513	0.323843	0.313919	0.294563	0.365783	0.31806	0.143282	0.268982	0.253158	0.488952	0.302179	0.273968	0.329254	0.361917	0.315682	0.276946	0.375527	0.266986	0.328629
		56	0.438369	0.403779	0.487651	0.277742	0.329653	0.308458	0.274398	0.373359	0.312316	0.130875	0.267075	0.258188	0.522941	0.305617	0.269121	0.29948	0.355701	0.323079	0.229372	0.381413	0.296901	0.325976
		57	0.417105	0.414912	0.493541	0.26004	0.329981	0.288407	0.231407	0.360907	0.312037	0.14787	0.277328	0.27703	0.495342	0.311005	0.277386	0.317086	0.322463	0.315682	0.24122	0.37515	0.24425	0.319531
		58	0.42476	0.408435	0.498574	0.271488	0.331412	0.317981	0.314724	0.349133	0.318481	0.114201	0.263657	0.268739	0.509159	0.291977	0.267272	0.364121	0.344305	0.281659	0.288973	0.33927	0.300743	0.327098
		59	0.447239	0.422402	0.530702	0.29201	0.329333	0.324258	0.268443	0.357172	0.316343	0.127384	0.279815	0.26342	0.50263	0.298281	0.27775	0.318035	0.371241	0.337181	0.266967	0.313748	0.272717	0.329384
		60	0.435939	0.386472	0.527381	0.279347	0.322643	0.324264	0.295651	0.354206	0.335322	0.125518	0.265	0.263884	0.50073	0.294614	0.258476	0.277818	0.374263	0.311245	0.254673	0.314172	0.254075	0.3217
		61	0.448698	0.398921	0.477264	0.275029	0.354361	0.28966	0.281653	0.35865	0.318963	0.146334	0.259872	0.271839	0.493235	0.279483	0.258924	0.312512	0.370637	0.304736	0.278816	0.350194	0.272528	0.323919
		62	0.426582	0.393759	0.52481	0.299524	0.315899	0.302423	0.285221	0.366294	0.323522	0.139694	0.28577	0.287764	0.469194	0.33049	0.268197	0.318898	0.335499	0.329193	0.2373	0.343319	0.265852	0.326153
		63	0.429013	0.380299	0.486902	0.267388	0.37769	0.321626	0.279736	0.341021	0.306457	0.137652	0.276244	0.291335	0.507777	0.290946	0.282456	0.312339	0.313312	0.264302	0.257435	0.407829	0.261129	0.323471
		64	0.428405	0.394468	0.487009	0.249823	0.342575	0.357598	0.26184	0.356483	0.327229	0.134387	0.259225	0.284774	0.49137	0.307222	0.257103	0.325371	0.369083	0.333335	0.25298	0.319775	0.262577	0.323935
		65	0.405925	0.392242	0.463236	0.263468	0.276333	0.305857	0.265824	0.345501	0.314532	0.178827	0.275803	0.270591	0.52826	0.264582	0.250716	0.313893	0.354752	0.333138	0.232133	0.369453	0.266167	0.317678
		66	0.440799	0.439303	0.456383	0.276179	0.345096	0.315304	0.296467	0.360795	0.321449	0.139852	0.250976	0.273107	0.495929	0.266302	0.25996	0.336676	0.359845	0.286787	0.232044	0.341436	0.289217	0.323043
		67	0.418076	0.370887	0.488187	0.29494	0.318038	0.275587	0.227409	0.352666	0.306383	0.145199	0.268978	0.28915	0.475687	0.325332	0.253321	0.30647	0.325917	0.33728	0.238102	0.342613	0.279015	0.316154
		68	0.429134	0.382323	0.480156	0.270544	0.313032	0.334176	0.305308	0.361075	0.311091	0.126339	0.239486	0.270578	0.494651	0.287392	0.270074	0.333138	0.313053	0.311836	0.269284	0.329711	0.265789	0.31896
		69	0.407383	0.397504	0.498467	0.271707	0.342428	0.315124	0.267419	0.361061	0.311634	0.135441	0.238901	0.24905	0.476551	0.273638	0.275677	0.326406	0.360536	0.310456	0.284875	0.351795	0.264844	0.320043
		70	0.440192	0.409953	0.464735	0.239199	0.320884	0.324563	0.269414	0.343246	0.317159	0.150624	0.269908	0.2496	0.493995	0.31857	0.248418	0.326234	0.351471	0.302172	0.246566	0.313183	0.279519	0.318076
		71	0.442865	0.391128	0.48551	0.250344	0.312736	0.294582	0.280837	0.35077	0.312117	0.140745	0.277131	0.270832	0.505048	0.295416	0.251528	0.3296	0.376853	0.328108	0.25886	0.349441	0.25672	0.321961
		72	0.447847	0.398212	0.506177	0.295137	0.332598	0.309915	0.258579	0.353143	0.308373	0.119429	0.289238	0.25822	0.48947	0.329803	0.264723	0.328219	0.333514	0.283927	0.269907	0.327262	0.278889	0.32298
		73	0.424152	0.398921	0.465056	0.243853	0.359886	0.282192	0.246695	0.348995	0.316436	0.132409	0.27531	0.269112	0.514098	0.260112	0.254974	0.300516	0.363039	0.306314	0.253426	0.352925	0.262955	0.31578
		74	0.433752	0.4055	0.48808	0.235983	0.373092	0.333823	0.24653	0.350699	0.313855	0.157801	0.265211	0.270673	0.518761	0.295072	0.269598	0.326493	0.330233	0.297142	0.24033	0.320152	0.267742	0.320977
		75	0.411029	0.39295	0.505642	0.250972	0.346024	0.288671	0.240684	0.346185	0.296011	0.138286	0.257616	0.267867	0.494098	0.302981	0.250463	0.337798	0.370896	0.32584	0.284875	0.311253	0.273221	0.318732
		76	0.43035	0.410762	0.476836	0.284733	0.346799	0.286014	0.286736	0.333811	0.31886	0.127816	0.285069	0.271377	0.502734	0.296448	0.271699	0.316999	0.370982	0.303059	0.215919	0.366251	0.294949	0.323724
		77	0.43679	0.412584	0.4627	0.286794	0.36218	0.284574	0.261784	0.344263	0.305655	0.13547	0.271767	0.270673	0.506672	0.282234	0.243768	0.321142	0.36373	0.281659	0.246833	0.31615	0.265852	0.317299
		78	0.419049	0.381311	0.527486	0.240773	0.326066	0.335474	0.277064	0.351215	0.309911	0.131157	0.233383	0.260786	0.505946	0.306534	0.246681	0.32563	0.335758	0.308878	0.255742	0.358293	0.270765	0.319424
		79	0.434481	0.400136	0.483582	0.30661	0.297676	0.323718	0.267876	0.350428	0.311645	0.135727	0.249333	0.281475	0.498312	0.284298	0.259232	0.308628	0.357687	0.31726	0.257346	0.337575	0.246077	0.319481
		80	0.41589	0.369368	0.510889	0.25662	0.316052	0.297089	0.276186	0.353544	0.308518	0.141171	0.267455	0.265331	0.525842	0.285444	0.263182	0.308887	0.327298	0.322684	0.251733	0.350288	0.282227	0.318843
			Kv3.1 KO (n=17)
		1	1	1	1	1	1	1	1	1	1	1	1	1	1	1	1	1	1					1
		2	0.994621	0.891617	0.865485	0.941718	0.848711	0.883008	0.994846	0.836376	0.869363	0.939378	0.815904	0.939076	0.938644	0.928181	0.966158	0.983077	0.949061					0.916778
		3	0.963284	0.744258	0.74837	0.882551	0.762509	0.802377	0.923112	0.775672	0.75739	0.841291	0.605565	0.877377	0.877728	0.843769	0.922373	0.949594	0.904767					0.834235
		4	0.93026	0.730938	0.664558	0.836779	0.700774	0.698556	0.838157	0.68408	0.667485	0.75838	0.55155	0.838663	0.816702	0.785689	0.88404	0.923848	0.859365					0.774696
		5	0.914297	0.662323	0.596547	0.802369	0.622327	0.626697	0.814372	0.656594	0.659405	0.779961	0.462897	0.788529	0.768321	0.769036	0.866157	0.917199	0.835607					0.737802
		6	0.901446	0.64215	0.593161	0.778048	0.555112	0.60298	0.82443	0.634123	0.482222	0.656753	0.457212	0.768646	0.711693	0.730004	0.855331	0.894837	0.791011					0.698774
		7	0.880095	0.626272	0.537231	0.771404	0.573043	0.548593	0.822516	0.61528	0.414892	0.68583	0.394862	0.741353	0.685193	0.726465	0.835283	0.896651	0.781447					0.678612
		8	0.880826	0.515937	0.509077	0.76664	0.472704	0.522466	0.790994	0.575746	0.373911	0.623584	0.3642	0.73903	0.622628	0.682853	0.825259	0.88275	0.768964					0.64221
		9	0.87294	0.554593	0.504312	0.732056	0.523449	0.544141	0.784326	0.532315	0.349097	0.591314	0.383781	0.715549	0.61603	0.660059	0.800238	0.870058	0.748226					0.634264
		10	0.861212	0.511853	0.489465	0.735353	0.488328	0.502481	0.773819	0.521432	0.313533	0.454339	0.317128	0.733953	0.555664	0.620923	0.790856	0.868849	0.749233					0.605201
		11	0.859377	0.472801	0.452769	0.721806	0.450132	0.473744	0.717265	0.554093	0.321736	0.586315	0.317256	0.680503	0.403813	0.618425	0.804649	0.865102	0.727388					0.589834
		12	0.862658	0.435048	0.446764	0.721713	0.450806	0.465396	0.777651	0.538067	0.334213	0.414144	0.348775	0.681277	0.556214	0.56326	0.806333	0.85797	0.672624					0.584289
		13	0.855147	0.441214	0.437981	0.712608	0.419824	0.42928	0.75809	0.501143	0.288613	0.480993	0.348714	0.704406	0.48969	0.604373	0.792941	0.86631	0.694469					0.577988
		14	0.863741	0.481948	0.443936	0.716142	0.392264	0.430859	0.735459	0.515194	0.301999	0.498532	0.276979	0.686141	0.374675	0.517254	0.78444	0.853377	0.715609					0.564032
		15	0.848739	0.427555	0.417277	0.714818	0.40032	0.440703	0.753293	0.508531	0.277792	0.412979	0.298056	0.698838	0.38721	0.517983	0.785242	0.858091	0.716012					0.556673
		16	0.850261	0.410492	0.436191	0.709034	0.401501	0.431663	0.720398	0.50637	0.276361	0.436378	0.279045	0.683322	0.370167	0.551498	0.757896	0.85241	0.647758					0.548279
		17	0.848517	0.490347	0.414076	0.720411	0.419772	0.459536	0.708983	0.500526	0.285608	0.472528	0.292061	0.649125	0.424815	0.570025	0.778426	0.847695	0.698596					0.563591
		18	0.856222	0.37819	0.408782	0.706996	0.364801	0.451013	0.749078	0.480471	0.288518	0.425068	0.271919	0.683322	0.320906	0.577624	0.78436	0.850113	0.706247					0.547272
		19	0.852386	0.392517	0.415306	0.719698	0.42339	0.429297	0.763162	0.530901	0.275118	0.451687	0.292667	0.652718	0.445267	0.585118	0.799356	0.844432	0.686214					0.562308
		20	0.848855	0.331051	0.415233	0.71818	0.396879	0.442017	0.755876	0.535209	0.295363	0.416972	0.317608	0.686638	0.426355	0.538904	0.791096	0.848783	0.687221					0.556014
		21	0.848713	0.431411	0.40957	0.717591	0.424075	0.456496	0.734897	0.562936	0.30207	0.421749	0.287425	0.659985	0.327503	0.565238	0.788931	0.854102	0.692355					0.557944
		22	0.843972	0.416754	0.417884	0.715612	0.410451	0.422059	0.740446	0.52492	0.277998	0.450396	0.307776	0.693593	0.495188	0.589802	0.781393	0.856882	0.650678					0.564459
		23	0.849187	0.41135	0.402175	0.717977	0.379755	0.467945	0.738233	0.514641	0.295085	0.384413	0.293256	0.69383	0.358071	0.510593	0.803286	0.860629	0.692254					0.551334
		24	0.855408	0.430209	0.413863	0.695504	0.410535	0.422193	0.74811	0.556166	0.316549	0.401635	0.293138	0.716156	0.448126	0.534741	0.788771	0.853256	0.668094					0.561909
		25	0.852859	0.360903	0.418101	0.7032	0.397958	0.464852	0.682631	0.513637	0.275211	0.42516	0.299316	0.685604	0.403154	0.582516	0.777303	0.865948	0.671114					0.551733
		26	0.850029	0.405368	0.40128	0.705006	0.42494	0.434961	0.720094	0.553603	0.295789	0.421173	0.30669	0.678141	0.319586	0.546294	0.769925	0.850959	0.670711					0.550268
		27	0.851705	0.412704	0.433688	0.713892	0.423815	0.440339	0.729598	0.477442	0.276302	0.37546	0.262216	0.685084	0.381602	0.57575	0.764793	0.859179	0.679167					0.549573
		28	0.846867	0.37937	0.419075	0.70687	0.405691	0.438782	0.725306	0.540472	0.262708	0.437887	0.319335	0.699398	0.510472	0.553372	0.783478	0.850597	0.666684					0.561551
		29	0.849383	0.448072	0.435436	0.683522	0.382278	0.462561	0.735653	0.513791	0.273248	0.408302	0.28797	0.691219	0.389739	0.584389	0.794865	0.853981	0.731012					0.560319
		30	0.844744	0.419062	0.436733	0.691834	0.410844	0.472451	0.73613	0.552183	0.287149	0.390747	0.305111	0.676552	0.355652	0.556286	0.789813	0.848179	0.665476					0.555232
		31	0.84799	0.44677	0.416166	0.696091	0.386686	0.430137	0.751187	0.528109	0.287149	0.554815	0.303174	0.68096	0.481003	0.54161	0.792379	0.847575	0.676952					0.56875
		32	0.852612	0.40906	0.413251	0.701888	0.442384	0.452159	0.741569	0.540397	0.278731	0.358053	0.344589	0.682017	0.429763	0.582203	0.760623	0.847575	0.679369					0.559779
		33	0.851379	0.443089	0.422495	0.687212	0.383753	0.431907	0.720776	0.510687	0.285872	0.390417	0.322597	0.68807	0.351474	0.547855	0.791257	0.850476	0.665678					0.549706
		34	0.84441	0.42029	0.452602	0.677441	0.381571	0.44138	0.70948	0.530712	0.317846	0.467739	0.273253	0.666212	0.477045	0.569401	0.769925	0.846849	0.682187					0.560491
		35	0.848489	0.450607	0.423442	0.682042	0.384894	0.426223	0.726259	0.548903	0.271657	0.449096	0.309944	0.682779	0.375335	0.522875	0.769043	0.847333	0.678664					0.552799
		36	0.853108	0.435368	0.438558	0.710716	0.378616	0.473118	0.711458	0.52147	0.297099	0.441601	0.315359	0.677494	0.447796	0.577207	0.774657	0.844915	0.677858					0.563318
		37	0.850629	0.400178	0.425628	0.702193	0.379579	0.449777	0.707547	0.537705	0.306294	0.448252	0.295515	0.693564	0.354773	0.601147	0.794544	0.846245	0.669704					0.556663
		38	0.847347	0.444989	0.413147	0.69286	0.438706	0.483497	0.708348	0.513775	0.27332	0.44267	0.308903	0.697885	0.427014	0.546502	0.782435	0.84419	0.704133					0.562925
		39	0.849882	0.426296	0.439568	0.688648	0.407625	0.422869	0.748694	0.520362	0.301993	0.514	0.311933	0.665155	0.466819	0.516838	0.794544	0.851322	0.665174					0.564219
		40	0.842945	0.382874	0.399315	0.674705	0.403626	0.454557	0.709393	0.536822	0.296805	0.440756	0.316557	0.717334	0.418108	0.592716	0.75958	0.855311	0.678764					0.557657
		41	0.853845	0.423907	0.441634	0.686914	0.402091	0.423045	0.736674	0.555581	0.295341	0.390582	0.321801	0.68807	0.563691	0.550666	0.75116	0.848904	0.691751					0.566215
		42	0.854336	0.437581	0.425058	0.684685	0.366395	0.428753	0.715147	0.517091	0.284078	0.419666	0.292715	0.697001	0.544888	0.548688	0.779067	0.847816	0.682489					0.560321
		43	0.844512	0.427323	0.412607	0.693331	0.437454	0.425349	0.738246	0.525396	0.27538	0.446075	0.337172	0.674259	0.352354	0.539945	0.78011	0.836696	0.651584					0.552811
		44	0.848831	0.365549	0.404738	0.684754	0.428488	0.445867	0.723009	0.538768	0.27951	0.430391	0.291433	0.698589	0.46473	0.616031	0.78043	0.84274	0.692254					0.560948
		45	0.838279	0.391385	0.392559	0.696675	0.426375	0.460365	0.75066	0.539878	0.308003	0.425078	0.300531	0.69383	0.472427	0.552331	0.765033	0.849509	0.706449					0.562904
		46	0.844019	0.377892	0.463932	0.700256	0.426165	0.427076	0.690664	0.554632	0.297238	0.461357	0.239015	0.694534	0.333771	0.532347	0.792299	0.83597	0.683697					0.550286
		47	0.843989	0.357845	0.42452	0.668602	0.389695	0.464452	0.729608	0.515296	0.3038	0.355093	0.31224	0.673144	0.404583	0.498311	0.753165	0.845882	0.679771					0.542353
		48	0.847465	0.397411	0.421318	0.691223	0.386412	0.446474	0.713699	0.543711	0.298739	0.422909	0.278292	0.69677	0.429763	0.56378	0.749636	0.84419	0.698697					0.554735
		49	0.842791	0.408489	0.423568	0.681129	0.38684	0.450132	0.719062	0.493574	0.298937	0.458462	0.304355	0.701235	0.443728	0.542339	0.782836	0.841168	0.708261					0.558053
		50	0.835286	0.418365	0.436025	0.683697	0.404164	0.443085	0.680157	0.549371	0.2745	0.458322	0.295999	0.691363	0.377974	0.583556	0.768963	0.837058	0.714301					0.556011
		51	0.837835	0.402405	0.422206	0.677416	0.406471	0.460614	0.727114	0.501126	0.291237	0.435648	0.336702	0.735963	0.474736	0.637785	0.768161	0.837421	0.674939					0.56634
		52	0.840179	0.392423	0.410087	0.669295	0.418758	0.457997	0.748016	0.537029	0.286257	0.502604	0.348277	0.695124	0.332561	0.594069	0.768401	0.83452	0.653195					0.558164
		53	0.835157	0.442347	0.413137	0.674865	0.351597	0.444804	0.717423	0.536999	0.324468	0.461819	0.31987	0.709518	0.470337	0.554517	0.764953	0.832586	0.667188					0.560093
		54	0.839732	0.408966	0.423914	0.661281	0.382138	0.455104	0.716972	0.500475	0.321311	0.441223	0.279074	0.671971	0.457252	0.569401	0.777864	0.838267	0.686013					0.554762
		55	0.84447	0.457548	0.43686	0.686482	0.400528	0.440389	0.694142	0.5193	0.312036	0.410752	0.295553	0.688278	0.372586	0.579289	0.775458	0.840685	0.688932					0.555488
		56	0.834303	0.434775	0.43255	0.676098	0.348266	0.48132	0.684534	0.49823	0.297305	0.433105	0.31469	0.657161	0.403154	0.610619	0.753405	0.842498	0.671315					0.551372
		57	0.841281	0.405302	0.408677	0.687574	0.39979	0.418779	0.689031	0.520059	0.292165	0.409417	0.313958	0.713574	0.519158	0.585846	0.765514	0.839718	0.677355					0.55807
		58	0.834208	0.387777	0.407932	0.677741	0.402407	0.471218	0.704963	0.526753	0.288251	0.495663	0.274141	0.70194	0.388309	0.512466	0.772892	0.839234	0.669906					0.550341
		59	0.842079	0.389171	0.449776	0.664038	0.421597	0.439676	0.709678	0.527342	0.291405	0.426137	0.286174	0.667859	0.503105	0.599898	0.766397	0.848058	0.664772					0.558657
		60	0.837701	0.413702	0.457013	0.675793	0.372275	0.454664	0.659156	0.536589	0.315107	0.514233	0.282931	0.686603	0.442078	0.601147	0.761745	0.839959	0.656517					0.559248
		61	0.838934	0.456063	0.414522	0.680631	0.406452	0.440393	0.695857	0.528654	0.332901	0.473685	0.344366	0.650991	0.454394	0.530161	0.776742	0.836091	0.656315					0.559832
		62	0.841318	0.447121	0.414122	0.676071	0.392404	0.435	0.723768	0.538018	0.319378	0.464455	0.304273	0.716924	0.428444	0.566695	0.772251	0.840322	0.718126					0.564629
		63	0.833125	0.450895	0.407212	0.661753	0.386135	0.461759	0.680707	0.513559	0.313192	0.45222	0.344254	0.69718	0.554894	0.528808	0.768081	0.833069	0.663563					0.561789
		64	0.828506	0.435991	0.450312	0.67285	0.386471	0.416099	0.714012	0.521148	0.292902	0.42674	0.30327	0.756412	0.355982	0.59334	0.766557	0.83319	0.646852					0.552978
		65	0.83343	0.40984	0.433963	0.672384	0.350781	0.456483	0.714746	0.536724	0.304282	0.439351	0.310403	0.686603	0.41349	0.551811	0.756212	0.843465	0.691348					0.553254
		66	0.834664	0.378377	0.413769	0.672746	0.39923	0.424528	0.687885	0.511983	0.289381	0.38988	0.282139	0.726617	0.408212	0.627272	0.779949	0.837179	0.672724					0.549208
		67	0.83314	0.389165	0.407297	0.657367	0.362093	0.438185	0.735557	0.520359	0.315242	0.433594	0.284036	0.685956	0.428664	0.608433	0.750358	0.833432	0.706851					0.552337
		68	0.831633	0.401693	0.421696	0.681522	0.391344	0.433055	0.705825	0.519836	0.280901	0.488457	0.301112	0.665357	0.394577	0.567944	0.748914	0.831861	0.661651					0.548669
		69	0.833751	0.411735	0.416355	0.668545	0.399668	0.441887	0.713027	0.504977	0.276588	0.410703	0.296893	0.682103	0.462311	0.601251	0.746108	0.838025	0.687221					0.55242
		70	0.83578	0.413714	0.4415	0.639684	0.393516	0.452141	0.692958	0.527727	0.304652	0.522862	0.314901	0.7067	0.454064	0.598441	0.788771	0.829443	0.675241					0.564241
		71	0.833483	0.375367	0.408596	0.676531	0.393641	0.424341	0.690768	0.480602	0.270423	0.450398	0.289963	0.686285	0.447686	0.550145	0.758618	0.833069	0.701415					0.545372
		72	0.829006	0.410093	0.409475	0.674881	0.402127	0.45331	0.663259	0.509989	0.332097	0.453179	0.297393	0.686072	0.375445	0.576479	0.768802	0.83452	0.652893					0.548766
		73	0.830159	0.424401	0.399214	0.652785	0.402191	0.455395	0.684543	0.518265	0.269157	0.429818	0.301622	0.67211	0.433612	0.583244	0.767279	0.840806	0.653799					0.548141
		74	0.82886	0.399145	0.425232	0.65025	0.436977	0.430975	0.724935	0.501427	0.292045	0.407667	0.338586	0.657374	0.356422	0.585222	0.74723	0.833916	0.680879					0.546891
		75	0.841265	0.354945	0.437183	0.660664	0.371538	0.444403	0.677555	0.559825	0.303202	0.5121	0.303665	0.662977	0.379183	0.581579	0.756934	0.837904	0.64947					0.549082
		76	0.830983	0.40409	0.401134	0.660111	0.373608	0.468438	0.681279	0.503671	0.310999	0.464386	0.285844	0.697353	0.525096	0.582828	0.774496	0.831377	0.676449					0.557185
		77	0.830212	0.374493	0.438956	0.672432	0.347639	0.428407	0.710914	0.527064	0.302137	0.465391	0.326862	0.637769	0.492109	0.558264	0.752443	0.81663	0.655913					0.549273
		78	0.829962	0.362651	0.436186	0.664828	0.388404	0.409629	0.653291	0.515072	0.31528	0.488499	0.313251	0.633188	0.486831	0.551082	0.724696	0.839838	0.686717					0.547024
		79	0.830242	0.416931	0.458974	0.660144	0.400149	0.443847	0.682732	0.50019	0.312811	0.430846	0.30254	0.702644	0.465389	0.586263	0.763349	0.834762	0.665678					0.556323
		80	0.826211	0.420964	0.422267	0.659718	0.35766	0.411943	0.734812	0.506644	0.290556	0.501955	0.300374	0.717276	0.381932	0.535365	0.78035	0.836212	0.709771					0.552589
			EPSC short term depression tau 100Hz				EPSC short term depression steady-state amplitude 100Hz
			WT (n=21)	Kv3.3 KO (n=21)	Kv3.1 KO (n=17)		WT (n=21)	Kv3.3 KO (n=21)	Kv3.1 KO (n=17)
			43.83	23.69	50.3		0.5665	0.4358	0.8409															19.9439
			32.42	22.1	48.67		0.3467	0.5022	0.4078															17.4078
			33.11	25.12	36.51		0.373	0.2687	0.4224															15.9674
			38.63	24.68	53.66		0.6391	0.3261	0.6817															19.7695
			25.89	36.77	42.78		0.5434	0.3119	0.3939															17.7815
			34.26	27.05	37.4		0.3899	0.2713	0.4425															16.6356
			40.92	27.59	56.82		0.4695	0.3597	0.7115															21.1451
			46.14	26.01	30.47		0.4173	0.3292	0.5223															17.3148
			45.97	25.63	37.78		0.3313	0.1425	0.2918															18.3576
			51.38	16.94	50.48		0.3986	0.2781	0.4389															19.9859
			35.78	16.07	28.87		0.3297	0.2741	0.3035															13.6046
			49.62	28.12	35.58		0.6746	0.5106	0.6865															19.1986
			43.97	18.54	52.42		0.3697	0.2951	0.4221															19.3361
			43.8	14.67	45.21		0.3733	0.2705	0.5646															17.4814
			45.34	23.42	47.89		0.4869	0.3235	0.7709															19.7052
			38.56	26.76	53.52		0.4311	0.3541	0.842															20.0779
			53.16	23.61	50.42		0.3728	0.3073	0.6776															21.4246
			27.52	19.36			0.2731	0.2562																11.8523
			40.09	18.06			0.5233	0.2537																14.7318
			46.85	27.03			0.5145	0.363																18.6894
			38.76	31.9			0.337	0.2676																17.8162
		Average	40.7619	23.9581	44.6341	#DIV/0!	0.436252	0.319105	0.554171
		One way ANOVA & Tukey’s multiple comparisons		P=<0.0001 compared to WT	P=0.2305 Compared to WT			P=0.0123 compared to WT	P=0.0183 Compared to WT
Figure 4F		Normalised EPSC amplitudes 200Hz
	Stimulus number	WT (n=10)										Average	Kv3.3 KO (n=9)									Average	Kv3.1 KO (n=5)					Average
	1	1	1	1	1	1	1	1	1	1	1	1	1	1	1	1	1	1	1	1	1	1	1	1	1	1	1	1
	2	0.94727	0.86206	0.890743	0.921732	0.946373	0.865989	0.891923	0.887606	0.902176	0.888257	0.900413	0.772589	0.556895	0.633341	0.749356	0.783962	0.810845	0.572426	0.699403	0.795852	0.708297	0.916425	0.93666	0.937079	0.928662	0.853412	0.914448
	3	0.889273	0.73461	0.774777	0.804447	0.853718	0.726151	0.737414	0.796354	0.834735	0.78737	0.793885	0.667889	0.346999	0.472762	0.556124	0.638821	0.568986	0.474078	0.558024	0.675145	0.550981	0.826095	0.894477	0.867434	0.873661	0.75638	0.843609
	4	0.823848	0.642293	0.676829	0.692354	0.784537	0.655455	0.483379	0.755266	0.691282	0.687978	0.689322	0.607703	0.287727	0.400882	0.450554	0.542824	0.439208	0.374176	0.475696	0.42156	0.444481	0.783296	0.817079	0.794596	0.851878	0.663846	0.782139
	5	0.78729	0.567233	0.633893	0.601657	0.730146	0.612435	0.427701	0.68027	0.566526	0.547699	0.615485	0.563624	0.268382	0.342133	0.378488	0.429476	0.356815	0.319021	0.432004	0.349788	0.382192	0.747523	0.780339	0.782172	0.827264	0.618537	0.751167
	6	0.768906	0.509147	0.556647	0.548875	0.649038	0.55951	0.325689	0.669899	0.505094	0.471253	0.556406	0.507649	0.248145	0.310109	0.351667	0.403759	0.330221	0.254854	0.390554	0.302171	0.344348	0.711415	0.75008	0.735323	0.775312	0.581973	0.710821
	7	0.750417	0.545634	0.536616	0.47981	0.644076	0.53601	0.314553	0.612654	0.514108	0.416324	0.53502	0.450169	0.208218	0.284882	0.30548	0.355497	0.333509	0.281577	0.343333	0.237363	0.311114	0.690211	0.710314	0.610964	0.771718	0.522921	0.661226
	8	0.701638	0.480217	0.491668	0.478079	0.61898	0.535136	0.31515	0.601485	0.433535	0.374526	0.503041	0.473662	0.218049	0.225212	0.309679	0.323086	0.313298	0.278159	0.314713	0.257501	0.301484	0.674799	0.712522	0.695542	0.760609	0.446045	0.657903
	9	0.691418	0.47486	0.483809	0.42868	0.481954	0.509984	0.271402	0.544939	0.377333	0.347225	0.46116	0.368796	0.188327	0.271865	0.304452	0.324407	0.286801	0.227819	0.296636	0.251918	0.280113	0.665575	0.709902	0.655191	0.724232	0.49302	0.649584
	10	0.709645	0.421849	0.445377	0.393911	0.562204	0.48629	0.264243	0.581439	0.390354	0.372576	0.462789	0.376749	0.190195	0.225212	0.250124	0.289531	0.25866	0.271478	0.279655	0.214464	0.261785	0.670357	0.679779	0.568105	0.723905	0.434635	0.615356
	11	0.68062	0.403408	0.424292	0.374718	0.40762	0.476093	0.266629	0.544041	0.374996	0.363476	0.431589	0.413543	0.194449	0.19987	0.261435	0.246993	0.25953	0.195037	0.283423	0.21873	0.252557	0.636667	0.670203	0.512821	0.695479	0.379498	0.578934
	12	0.640164	0.429406	0.355192	0.385966	0.372027	0.436375	0.240281	0.504848	0.341609	0.35262	0.405849	0.337917	0.168349	0.175449	0.278745	0.269275	0.237288	0.210729	0.288527	0.210323	0.241845	0.651517	0.651316	0.461528	0.676201	0.397155	0.567543
	13	0.672139	0.388464	0.355767	0.340107	0.393593	0.437346	0.233023	0.511929	0.30978	0.333119	0.397527	0.249727	0.189218	0.195608	0.254152	0.273679	0.265913	0.225955	0.242784	0.225066	0.235789	0.619177	0.621403	0.4776	0.687964	0.341018	0.549432
	14	0.681252	0.346394	0.343116	0.3346	0.359145	0.438803	0.206476	0.485002	0.330703	0.307637	0.383313	0.294607	0.192063	0.234197	0.242841	0.243911	0.228584	0.185715	0.258477	0.195893	0.230699	0.604327	0.641114	0.422088	0.687202	0.333355	0.537617
	15	0.649488	0.377749	0.352221	0.355524	0.308953	0.391122	0.241375	0.531974	0.342388	0.302176	0.385297	0.317699	0.156362	0.21519	0.247811	0.256769	0.213112	0.190065	0.230191	0.178452	0.22285	0.622942	0.650904	0.349707	0.65126	0.341934	0.523349
	16	0.633579	0.390438	0.338324	0.326813	0.360004	0.434724	0.201008	0.452092	0.337714	0.305752	0.378045	0.280204	0.175363	0.221987	0.249953	0.251485	0.238835	0.21135	0.235963	0.192694	0.228648	0.615408	0.607823	0.283253	0.64026	0.340851	0.497519
	17	0.600709	0.348988	0.32644	0.310608	0.36468	0.430257	0.229146	0.456679	0.308667	0.308612	0.368479	0.290931	0.178007	0.222908	0.264006	0.257738	0.216206	0.183695	0.264964	0.182844	0.229033	0.596343	0.590868	0.438844	0.671627	0.356426	0.530822
	18	0.601552	0.361564	0.322607	0.292831	0.389967	0.421809	0.232327	0.42706	0.280289	0.286705	0.361671	0.292034	0.192178	0.244565	0.263492	0.244263	0.239899	0.193638	0.253421	0.175441	0.233215	0.589648	0.610511	0.271512	0.678489	0.322528	0.494538
	19	0.632684	0.36179	0.338995	0.307934	0.347886	0.389957	0.217016	0.508937	0.314343	0.329543	0.374908	0.308977	0.18275	0.223945	0.24464	0.254215	0.239996	0.189599	0.238729	0.202167	0.231669	0.605171	0.626157	0.282911	0.639607	0.286547	0.488079
	20	0.598602	0.375832	0.340529	0.310608	0.365252	0.39792	0.208664	0.463959	0.312896	0.274875	0.364914	0.282911	0.193271	0.203902	0.243697	0.26082	0.254018	0.174994	0.273168	0.200473	0.231917	0.590546	0.607547	0.340018	0.664221	0.35626	0.511718
	21	0.607083	0.335003	0.333053	0.325318	0.353325	0.429675	0.232526	0.436235	0.272164	0.328763	0.365314	0.346372	0.193587	0.237077	0.263235	0.283983	0.262334	0.204514	0.254327	0.196834	0.24914	0.587284	0.571637	0.293055	0.632854	0.310951	0.479156
	22	0.630313	0.350962	0.32414	0.29755	0.337675	0.414817	0.222086	0.462364	0.27439	0.310302	0.36246	0.384068	0.213881	0.208855	0.254237	0.284335	0.230518	0.261845	0.267683	0.187988	0.254823	0.570582	0.615474	0.387892	0.647339	0.351013	0.51446
	23	0.647433	0.374648	0.344362	0.300068	0.351989	0.423265	0.210752	0.43055	0.284184	0.291711	0.365896	0.328059	0.221383	0.208855	0.228787	0.281957	0.246571	0.199387	0.263819	0.206998	0.242868	0.562934	0.582596	0.278351	0.662369	0.317364	0.480723
	24	0.6271	0.333085	0.297688	0.304237	0.374127	0.400639	0.201008	0.44541	0.302658	0.304062	0.359001	0.325619	0.21779	0.268294	0.247811	0.287065	0.25982	0.210884	0.247363	0.209507	0.252684	0.598817	0.595972	0.291346	0.646359	0.382329	0.502965
	25	0.640901	0.342672	0.292897	0.28937	0.312484	0.415205	0.199914	0.422372	0.29509	0.286575	0.349748	0.343532	0.202469	0.211504	0.269147	0.297458	0.234097	0.219119	0.257093	0.218604	0.250336	0.592684	0.578943	0.349023	0.640805	0.373168	0.506925
	26	0.638636	0.350455	0.320594	0.292516	0.420788	0.430646	0.207073	0.40851	0.283739	0.292426	0.364538	0.355429	0.204798	0.207933	0.269576	0.269011	0.256822	0.23419	0.268112	0.217538	0.253712	0.587736	0.594798	0.30377	0.606606	0.324943	0.483571
	27	0.651595	0.346112	0.303726	0.307226	0.357141	0.399376	0.228847	0.461965	0.306219	0.301916	0.366412	0.283345	0.21483	0.232124	0.285686	0.274031	0.246668	0.224712	0.249652	0.225819	0.248541	0.585036	0.571433	0.334661	0.608131	0.349264	0.489705
	28	0.630629	0.362072	0.317623	0.303529	0.396932	0.408796	0.245452	0.422771	0.294311	0.330908	0.371302	0.2916	0.208879	0.20609	0.242412	0.297986	0.251697	0.215545	0.245598	0.194513	0.239369	0.57131	0.590665	0.265129	0.675221	0.384495	0.497364
	29	0.640796	0.341375	0.298551	0.350883	0.334431	0.416079	0.220893	0.437631	0.345171	0.301136	0.368695	0.322144	0.205459	0.225443	0.30171	0.281253	0.232549	0.208554	0.257284	0.21095	0.249483	0.589477	0.585013	0.364639	0.642656	0.365672	0.509491
	30	0.604133	0.356771	0.29558	0.307619	0.343878	0.407534	0.220396	0.421076	0.306553	0.28053	0.354407	0.34694	0.201233	0.233967	0.252952	0.269011	0.249279	0.211972	0.255663	0.235355	0.250708	0.592403	0.585284	0.445227	0.655181	0.367754	0.52917
	31	0.668293	0.337766	0.325003	0.318396	0.350176	0.439483	0.236603	0.409707	0.282403	0.357365	0.37252	0.329262	0.206953	0.236156	0.264349	0.302918	0.246765	0.21974	0.240256	0.201289	0.249743	0.589367	0.601692	0.394845	0.635686	0.316448	0.507608
	32	0.629997	0.31284	0.336695	0.339399	0.344069	0.434433	0.226461	0.453787	0.309001	0.301981	0.368866	0.283078	0.201693	0.251015	0.263835	0.294199	0.233903	0.206534	0.27188	0.235669	0.24909	0.571591	0.545448	0.309128	0.64331	0.367587	0.487413
	33	0.629576	0.386377	0.331232	0.367245	0.341111	0.443076	0.245452	0.383079	0.293309	0.294766	0.371522	0.310915	0.18436	0.233737	0.268376	0.27773	0.241156	0.196746	0.257618	0.192819	0.240384	0.568048	0.545311	0.34378	0.649409	0.336271	0.488564
	34	0.614931	0.377524	0.290884	0.337825	0.348458	0.391996	0.221191	0.505646	0.276839	0.301071	0.366636	0.286052	0.193242	0.2236	0.263663	0.277554	0.226167	0.222848	0.246647	0.210323	0.2389	0.582953	0.586667	0.344007	0.669667	0.344516	0.505562
	35	0.635634	0.36444	0.338516	0.313597	0.363439	0.406465	0.21791	0.414494	0.316013	0.316412	0.368692	0.270947	0.187119	0.219683	0.254066	0.258883	0.240963	0.236831	0.279464	0.223059	0.241224	0.568444	0.560956	0.301376	0.635359	0.333022	0.479831
	36	0.599866	0.377524	0.332478	0.326262	0.364107	0.429092	0.238094	0.393252	0.305997	0.309652	0.367632	0.322111	0.182635	0.203671	0.246354	0.26813	0.251407	0.18183	0.251847	0.203171	0.234573	0.571651	0.566335	0.422658	0.653112	0.349097	0.512571
	37	0.654545	0.347973	0.362476	0.293145	0.36363	0.42142	0.243662	0.457377	0.254692	0.297431	0.369635	0.278299	0.196749	0.224751	0.238813	0.250164	0.239899	0.223469	0.229858	0.210825	0.232536	0.591053	0.58005	0.333407	0.653765	0.354511	0.502557
	38	0.650014	0.357673	0.304589	0.357491	0.312388	0.42346	0.252213	0.426262	0.276616	0.311212	0.367192	0.319103	0.175478	0.236962	0.267691	0.259851	0.280708	0.21772	0.250559	0.194639	0.244746	0.559165	0.561576	0.318702	0.640914	0.350846	0.486241
	39	0.623465	0.340755	0.309956	0.321385	0.359909	0.354512	0.219103	0.435736	0.327253	0.292166	0.358424	0.298684	0.193644	0.242376	0.257322	0.239595	0.245701	0.190531	0.270163	0.211829	0.238872	0.544089	0.58901	0.341386	0.661825	0.315948	0.490452
	40	0.606767	0.326544	0.33612	0.30581	0.342924	0.410932	0.210553	0.428157	0.32959	0.290411	0.358781	0.296111	0.183986	0.235695	0.260236	0.289972	0.232839	0.229373	0.252848	0.196332	0.241932	0.548194	0.54345	0.297729	0.661389	0.339102	0.477973
	41	0.599339	0.352598	0.348675	0.327049	0.360863	0.43152	0.218706	0.417885	0.256139	0.299446	0.361222	0.256811	0.199681	0.239727	0.236585	0.283631	0.263301	0.194415	0.236345	0.210762	0.235695	0.569624	0.551996	0.441694	0.673479	0.323111	0.511981
	42	0.594387	0.35068	0.301043	0.305023	0.392161	0.400639	0.225467	0.424965	0.288079	0.310952	0.35934	0.289996	0.19169	0.203326	0.259979	0.258002	0.249279	0.175616	0.253898	0.213773	0.23284	0.559672	0.56564	0.325656	0.650171	0.335271	0.487282
	43	0.606345	0.366245	0.321361	0.319969	0.378707	0.417924	0.217413	0.391058	0.336267	0.309457	0.366475	0.283412	0.188643	0.211274	0.254751	0.269011	0.237481	0.17748	0.240304	0.213711	0.230674	0.568329	0.558199	0.298413	0.656815	0.314949	0.479341
	44	0.578479	0.357335	0.328261	0.310923	0.35571	0.411903	0.191363	0.446307	0.328254	0.318168	0.36267	0.270179	0.199997	0.207588	0.240184	0.2558	0.244444	0.214769	0.224945	0.191815	0.227747	0.566868	0.562886	0.378773	0.613467	0.352512	0.494901
	45	0.627047	0.382092	0.31839	0.282683	0.33863	0.432976	0.200014	0.407812	0.281068	0.27494	0.354565	0.271382	0.20612	0.266567	0.264777	0.280548	0.252664	0.173285	0.249319	0.194576	0.239915	0.550387	0.585148	0.408752	0.642765	0.328441	0.503099
	46	0.634475	0.338725	0.310627	0.30345	0.343878	0.416662	0.209658	0.43434	0.313675	0.291516	0.359701	0.272017	0.186171	0.223715	0.249353	0.286977	0.240866	0.223158	0.250368	0.192694	0.236147	0.565182	0.507402	0.486833	0.644943	0.343933	0.509659
	47	0.623307	0.344702	0.326153	0.339241	0.361913	0.408213	0.23352	0.455283	0.297984	0.290281	0.36806	0.270078	0.184734	0.228092	0.257751	0.261877	0.234483	0.219896	0.239779	0.225882	0.235841	0.563551	0.565369	0.281657	0.62327	0.310035	0.468776
	48	0.632157	0.337089	0.327399	0.326341	0.345023	0.393258	0.243463	0.406615	0.286409	0.291191	0.358895	0.291098	0.183641	0.238344	0.288428	0.252277	0.27568	0.193017	0.218076	0.214526	0.239454	0.528175	0.530767	0.295107	0.660191	0.340019	0.470852
	49	0.625045	0.315378	0.343787	0.32107	0.380615	0.385004	0.222186	0.443116	0.304995	0.318753	0.365995	0.317432	0.184072	0.246523	0.246697	0.278699	0.248602	0.202339	0.241639	0.229144	0.243905	0.573618	0.538763	0.272652	0.650171	0.320196	0.47108
	50	0.585485	0.351977	0.345512	0.30227	0.355901	0.408116	0.210255	0.411701	0.28129	0.265189	0.35177	0.291633	0.180106	0.195147	0.245154	0.25263	0.234193	0.206689	0.23997	0.218542	0.22934	0.566868	0.54021	0.341158	0.654092	0.332772	0.48702
	51	0.61293	0.358857	0.320498	0.311316	0.306568	0.405009	0.232626	0.410106	0.294088	0.28196	0.353396	0.26139	0.194794	0.2236	0.264006	0.283631	0.253631	0.182141	0.238586	0.193886	0.232852	0.500839	0.527942	0.367945	0.6322	0.309452	0.467676
	52	0.622833	0.371095	0.325769	0.303293	0.350939	0.375487	0.205681	0.398837	0.296759	0.293336	0.354403	0.325586	0.193932	0.235004	0.284315	0.240652	0.234387	0.189288	0.234914	0.19445	0.236948	0.568389	0.527114	0.300351	0.6493	0.319779	0.472987
	53	0.59228	0.340755	0.327303	0.324689	0.30361	0.374031	0.218109	0.44541	0.311672	0.289696	0.352755	0.272718	0.185682	0.193649	0.232729	0.252013	0.265332	0.221915	0.232386	0.181464	0.226432	0.539366	0.53828	0.281999	0.636448	0.30004	0.459227
	54	0.592649	0.338048	0.312256	0.302899	0.362008	0.411127	0.232725	0.373904	0.286743	0.311472	0.352383	0.267238	0.183382	0.216112	0.246011	0.249371	0.233613	0.201873	0.229524	0.209194	0.226258	0.530197	0.570332	0.371706	0.65028	0.332023	0.490908
	55	0.623044	0.317915	0.307464	0.302192	0.328897	0.40025	0.208465	0.420976	0.304661	0.267724	0.348159	0.268942	0.164382	0.223139	0.24584	0.271301	0.251697	0.22813	0.21178	0.205931	0.230127	0.545439	0.486174	0.289294	0.611289	0.327192	0.451878
	56	0.623518	0.354064	0.341583	0.292909	0.344832	0.395201	0.215822	0.424068	0.321466	0.311212	0.362467	0.30226	0.192466	0.239842	0.252095	0.267161	0.239319	0.200319	0.227997	0.202104	0.235951	0.530087	0.502095	0.358028	0.595279	0.273054	0.451709
	57	0.637056	0.357391	0.333532	0.307226	0.374317	0.436861	0.207968	0.405319	0.314009	0.300746	0.367443	0.237763	0.194162	0.252628	0.218504	0.251925	0.24164	0.222537	0.215882	0.198403	0.225938	0.550447	0.502646	0.356204	0.651696	0.325693	0.477337
	58	0.582746	0.361959	0.372635	0.329802	0.380902	0.366845	0.204289	0.422273	0.293532	0.256478	0.357146	0.275158	0.194564	0.209546	0.243526	0.248843	0.230132	0.189443	0.223895	0.198089	0.223688	0.551175	0.484175	0.49219	0.658666	0.304038	0.498049
	59	0.630524	0.34177	0.318102	0.289684	0.343305	0.393938	0.206974	0.426561	0.328588	0.307637	0.358708	0.272351	0.180364	0.241685	0.249867	0.268571	0.225296	0.174839	0.237299	0.190372	0.226738	0.544766	0.566883	0.369996	0.643745	0.346349	0.494348
	60	0.633685	0.316223	0.323373	0.29755	0.370023	0.416079	0.214331	0.413696	0.258476	0.258558	0.350199	0.295877	0.189304	0.190539	0.228102	0.255096	0.266396	0.229995	0.240685	0.193196	0.232132	0.532561	0.517189	0.324858	0.635141	0.327109	0.467372
	61	0.610033	0.364835	0.333437	0.299596	0.387963	0.407825	0.201306	0.457676	0.301767	0.288526	0.365296	0.259384	0.191057	0.216688	0.250553	0.253775	0.205472	0.191308	0.245884	0.214401	0.225391	0.525756	0.505059	0.303428	0.641567	0.308702	0.456902
	62	0.631788	0.342277	0.307272	0.292673	0.304755	0.417536	0.212641	0.385672	0.326919	0.257323	0.347886	0.295376	0.191604	0.202519	0.249953	0.317098	0.236417	0.221449	0.235295	0.203422	0.239237	0.549378	0.541175	0.296475	0.654963	0.316281	0.471654
	63	0.635423	0.337202	0.331807	0.296449	0.346454	0.348782	0.216817	0.422173	0.296426	0.276045	0.350758	0.255341	0.184762	0.231087	0.237099	0.250252	0.243284	0.175926	0.214355	0.203045	0.221683	0.547632	0.518603	0.300465	0.624468	0.353345	0.468903
	64	0.62257	0.322201	0.338612	0.302428	0.307617	0.37539	0.19365	0.45249	0.264485	0.304322	0.348376	0.25387	0.180422	0.212426	0.266148	0.244615	0.22549	0.214147	0.227616	0.197964	0.224744	0.538297	0.543587	0.314713	0.647448	0.319113	0.472632
	65	0.640427	0.369008	0.315131	0.333656	0.374604	0.3717	0.211448	0.419879	0.293421	0.271819	0.360109	0.257881	0.188815	0.22694	0.253809	0.228234	0.239705	0.197833	0.249605	0.202543	0.227263	0.527106	0.504042	0.404534	0.628062	0.291544	0.471058
	66	0.578321	0.322201	0.327399	0.305023	0.393116	0.370438	0.207968	0.422372	0.324471	0.333054	0.358436	0.260989	0.19879	0.208048	0.217305	0.25492	0.233613	0.201407	0.230335	0.221804	0.225246	0.544204	0.559354	0.308216	0.631765	0.287463	0.4662
	67	0.602394	0.353161	0.359601	0.284335	0.362199	0.405883	0.194147	0.402526	0.301322	0.307572	0.357314	0.272819	0.176972	0.224176	0.25955	0.277289	0.236514	0.175926	0.228188	0.198905	0.227815	0.529525	0.5406	0.270486	0.63525	0.322278	0.459628
	68	0.578532	0.343011	0.317527	0.308012	0.388058	0.386558	0.195738	0.384874	0.2804	0.273574	0.345628	0.286921	0.175909	0.241915	0.262892	0.247169	0.248215	0.232947	0.250702	0.19445	0.237902	0.53633	0.449736	0.384929	0.642874	0.31195	0.465164
	69	0.589173	0.398107	0.331232	0.343489	0.371264	0.408796	0.206178	0.38667	0.262705	0.305687	0.36033	0.31145	0.176282	0.204823	0.248582	0.271653	0.250923	0.200941	0.218458	0.187361	0.230053	0.518388	0.572766	0.434513	0.606279	0.351929	0.496775
	70	0.617881	0.355925	0.30133	0.303371	0.383764	0.404814	0.211945	0.43055	0.307555	0.293726	0.361086	0.281942	0.176541	0.216342	0.253723	0.248931	0.222008	0.183073	0.216311	0.184224	0.220344	0.530423	0.495571	0.298527	0.629369	0.288962	0.44857
	71	0.624782	0.312389	0.360463	0.294325	0.310575	0.368593	0.248037	0.416289	0.291529	0.295676	0.352266	0.266168	0.174673	0.228898	0.237528	0.245848	0.251407	0.1795	0.205627	0.210135	0.222198	0.553428	0.557832	0.386296	0.639171	0.30687	0.488719
	72	0.616986	0.353387	0.31954	0.304315	0.320404	0.389083	0.196434	0.424766	0.275169	0.306987	0.350707	0.24194	0.195024	0.195032	0.237528	0.241533	0.236417	0.187113	0.219078	0.220173	0.219315	0.520692	0.46398	0.344235	0.625775	0.3132	0.453576
	73	0.59797	0.337315	0.310531	0.294876	0.322694	0.360727	0.207073	0.361339	0.3011	0.283455	0.337708	0.284983	0.187953	0.239957	0.22536	0.251573	0.244057	0.157282	0.225326	0.187737	0.222692	0.51726	0.492813	0.447393	0.612596	0.316614	0.477335
	74	0.620673	0.360436	0.339187	0.278829	0.348363	0.413166	0.194446	0.38298	0.312674	0.284105	0.353486	0.26286	0.165101	0.218992	0.21045	0.233166	0.224039	0.193172	0.210063	0.213209	0.214561	0.526318	0.558981	0.393364	0.633834	0.294959	0.481491
	75	0.590173	0.351131	0.341966	0.315485	0.327942	0.432782	0.208167	0.406615	0.267379	0.287745	0.352938	0.239066	0.186717	0.211619	0.235814	0.247081	0.241349	0.22176	0.227425	0.195015	0.222872	0.519738	0.503611	0.323832	0.611725	0.317281	0.455237
	76	0.613035	0.352203	0.339858	0.33106	0.342542	0.388694	0.208763	0.39385	0.300321	0.267464	0.353779	0.278132	0.166825	0.239727	0.254323	0.285304	0.211468	0.200785	0.240351	0.17726	0.228242	0.551853	0.528539	0.301718	0.651587	0.310118	0.468763
	77	0.653912	0.326092	0.309668	0.28111	0.378134	0.406077	0.200312	0.359045	0.277618	0.28599	0.347796	0.282109	0.191949	0.215766	0.221247	0.246112	0.227811	0.201096	0.222846	0.192882	0.222424	0.541444	0.525552	0.317563	0.659755	0.322528	0.473368
	78	0.604027	0.337146	0.293472	0.303529	0.339297	0.384713	0.218805	0.431348	0.278285	0.285665	0.347629	0.258716	0.164842	0.233967	0.248753	0.254303	0.210694	0.202184	0.210492	0.206182	0.221126	0.528903	0.499591	0.32064	0.639498	0.33727	0.46518
	79	0.591227	0.343349	0.30756	0.284257	0.326129	0.329943	0.206874	0.418583	0.305106	0.288396	0.340142	0.256043	0.170419	0.221065	0.226645	0.242413	0.233903	0.202805	0.236583	0.195203	0.220564	0.54977	0.586407	0.429041	0.629695	0.290545	0.497092
	80	0.581271	0.361564	0.313502	0.311159	0.384528	0.387238	0.201704	0.398737	0.292085	0.272534	0.350432	0.264731	0.163491	0.211735	0.241298	0.255008	0.205182	0.190376	0.221272	0.210135	0.218136	0.543191	0.583307	0.276527	0.611071	0.304871	0.463793
	81	0.599971	0.347409	0.349825	0.307226	0.320595	0.394618	0.2024	0.458374	0.259366	0.253553	0.349334	0.273487	0.182808	0.183512	0.258093	0.249547	0.229165	0.196435	0.212972	0.206496	0.221391	0.525641	0.525495	0.313573	0.61423	0.309452	0.457678
	82	0.623939	0.328687	0.332382	0.312418	0.29693	0.39656	0.213635	0.421275	0.30633	0.28794	0.35201	0.243979	0.187062	0.191461	0.223046	0.256593	0.237868	0.210574	0.212543	0.190812	0.217104	0.527779	0.556132	0.362587	0.646904	0.269889	0.472658
	83	0.604712	0.322652	0.336312	0.284571	0.372791	0.382965	0.230637	0.380087	0.320353	0.259143	0.349422	0.261456	0.19054	0.221065	0.260236	0.252365	0.261464	0.208554	0.244072	0.203359	0.233679	0.527046	0.614751	0.30833	0.612052	0.316365	0.475709
	84	0.591332	0.318028	0.305068	0.313597	0.351416	0.340236	0.21801	0.401429	0.290972	0.293401	0.342349	0.270981	0.191661	0.202289	0.248153	0.256329	0.220171	0.208398	0.22814	0.206496	0.225846	0.508487	0.512571	0.248943	0.635032	0.328775	0.446762
	85	0.623465	0.338386	0.332191	0.288662	0.34674	0.381897	0.22318	0.406017	0.286298	0.274224	0.350106	0.270546	0.181945	0.189157	0.252095	0.246641	0.227424	0.177014	0.21612	0.189494	0.216715	0.533741	0.576786	0.30149	0.64429	0.271222	0.465506
	86	0.597337	0.314193	0.330945	0.301798	0.327465	0.371991	0.208067	0.390758	0.298095	0.295026	0.343567	0.232516	0.186343	0.220605	0.254409	0.208682	0.21785	0.15231	0.220461	0.203924	0.210789	0.53492	0.572997	0.349593	0.61521	0.316198	0.477784
	87	0.593387	0.333931	0.351454	0.302192	0.339965	0.361601	0.190071	0.389263	0.268603	0.27598	0.340645	0.243644	0.176627	0.213808	0.259122	0.238362	0.237191	0.190686	0.213974	0.184036	0.217494	0.482671	0.625265	0.311749	0.647557	0.307203	0.474889
	88	0.603711	0.328743	0.289734	0.29464	0.367065	0.397434	0.187287	0.383877	0.341609	0.261419	0.345552	0.276094	0.186487	0.237423	0.230758	0.232109	0.245314	0.183384	0.207201	0.194701	0.221497	0.510233	0.595453	0.319044	0.609764	0.295043	0.465907
	89	0.60861	0.341657	0.309285	0.316744	0.347408	0.401124	0.198423	0.391556	0.293309	0.27793	0.348605	0.251832	0.180221	0.200561	0.251067	0.250516	0.217077	0.180432	0.226232	0.214464	0.219156	0.537565	0.602347	0.297045	0.567724	0.302539	0.461444
	90	0.607767	0.356883	0.316377	0.318003	0.319831	0.354512	0.205482	0.390958	0.291974	0.262524	0.342431	0.240169	0.191144	0.242376	0.263149	0.259323	0.238642	0.18152	0.208822	0.220549	0.227299	0.51878	0.612854	0.428585	0.632745	0.316448	0.501882
	91	0.591122	0.325585	0.326728	0.290235	0.347313	0.398211	0.229245	0.391058	0.293755	0.27988	0.347313	0.263395	0.183124	0.207703	0.239499	0.256241	0.238545	0.185249	0.218314	0.180146	0.219135	0.527046	0.558751	0.362473	0.614774	0.304454	0.4735
	92	0.538971	0.341826	0.306122	0.331532	0.316492	0.403358	0.187585	0.406815	0.297427	0.287615	0.341774	0.276762	0.188097	0.207818	0.238128	0.242325	0.241059	0.179189	0.208679	0.187675	0.218859	0.531658	0.567193	0.344007	0.62621	0.285131	0.47084
	93	0.536601	0.344702	0.306506	0.332634	0.339775	0.366456	0.215027	0.39375	0.330925	0.280985	0.344736	0.256711	0.178266	0.230166	0.214734	0.241268	0.219881	0.196435	0.203862	0.174876	0.212911	0.527894	0.595797	0.39268	0.655617	0.313699	0.497137
	94	0.633579	0.308328	0.29558	0.285201	0.343305	0.388694	0.191264	0.425663	0.272721	0.284105	0.342844	0.299186	0.186286	0.2327	0.253638	0.258618	0.228874	0.202028	0.204673	0.177825	0.227092	0.543075	0.534799	0.322236	0.591358	0.321612	0.462616
	95	0.575951	0.348255	0.326536	0.311238	0.352275	0.371506	0.224473	0.424965	0.331259	0.266554	0.353301	0.238331	0.173379	0.228898	0.237099	0.235544	0.236224	0.208554	0.209729	0.198528	0.218476	0.500051	0.507402	0.363841	0.620111	0.323028	0.462887
	96	0.587276	0.365399	0.331424	0.298573	0.332427	0.392093	0.195241	0.418084	0.266155	0.282285	0.346896	0.256611	0.185337	0.185816	0.232472	0.234927	0.224813	0.200009	0.223371	0.209507	0.216985	0.510961	0.573398	0.305594	0.624141	0.345182	0.471855
	97	0.613562	0.300151	0.326536	0.296371	0.328515	0.37908	0.204488	0.419879	0.269827	0.250693	0.33891	0.263194	0.172546	0.227516	0.232301	0.253334	0.20789	0.168158	0.203194	0.199344	0.214164	0.514223	0.544449	0.313459	0.641022	0.294626	0.461556
	98	0.537496	0.34865	0.300947	0.284021	0.318114	0.347131	0.227356	0.357748	0.295201	0.260509	0.327717	0.280405	0.180249	0.228553	0.243098	0.246641	0.261271	0.195503	0.207201	0.176633	0.224395	0.510289	0.586667	0.396099	0.617715	0.312367	0.484627
	99	0.629418	0.316731	0.32414	0.304158	0.361245	0.358008	0.191065	0.393451	0.261258	0.285405	0.342488	0.2394	0.179646	0.192037	0.227588	0.259851	0.220655	0.159613	0.214976	0.200599	0.210485	0.51726	0.608546	0.370566	0.612052	0.287213	0.479127
	100	0.580323	0.315941	0.320786	0.307304	0.323171	0.35189	0.216518	0.388764	0.288413	0.288851	0.338196	0.279068	0.166797	0.195492	0.226731	0.240476	0.221912	0.215079	0.218553	0.20292	0.218559	0.52266	0.674026	0.311179	0.620982	0.302122	0.486194
	101	0.559357	0.351977	0.345608	0.297393	0.300747	0.415496	0.19375	0.370414	0.2735	0.262459	0.33707	0.257413	0.180968	0.179365	0.215591	0.231845	0.221815	0.174062	0.213735	0.188678	0.207052	0.481155	0.618026	0.295335	0.649082	0.264975	0.461715
	102	0.569524	0.324739	0.316186	0.30172	0.301224	0.383936	0.184404	0.39026	0.278063	0.28287	0.333293	0.254038	0.154379	0.210583	0.219533	0.233254	0.246862	0.187735	0.202956	0.196834	0.211797	0.528511	0.5908	0.333065	0.651805	0.304954	0.481827
	103	0.563045	0.316054	0.306027	0.294561	0.321549	0.343829	0.193253	0.369716	0.236663	0.28339	0.322809	0.243411	0.184475	0.187199	0.268462	0.231405	0.214949	0.167537	0.211827	0.175566	0.209426	0.486214	0.634451	0.280859	0.627082	0.295126	0.464746
	104	0.537602	0.313178	0.303631	0.278829	0.362962	0.333924	0.201207	0.40851	0.296426	0.300876	0.333715	0.243912	0.186803	0.213117	0.21919	0.245496	0.222492	0.225334	0.209443	0.178703	0.216054	0.49167	0.617682	0.294423	0.59321	0.293044	0.458006
	105	0.578426	0.370644	0.331712	0.311946	0.391684	0.365388	0.205084	0.399235	0.276059	0.288135	0.351831	0.251765	0.16283	0.240879	0.264863	0.210796	0.219011	0.208554	0.216168	0.179581	0.217161	0.509611	0.612945	0.287698	0.612378	0.327858	0.470098
	106	0.61667	0.344308	0.343308	0.290786	0.330614	0.385004	0.196931	0.401629	0.2942	0.250563	0.345401	0.2655	0.18114	0.204823	0.218419	0.237129	0.238545	0.175305	0.218601	0.180648	0.213346	0.494204	0.622159	0.451725	0.642438	0.290128	0.500131
	107	0.591332	0.332465	0.321361	0.275997	0.343496	0.401416	0.210255	0.3754	0.289192	0.292426	0.343334	0.265166	0.169355	0.210122	0.248325	0.233166	0.238255	0.17515	0.216359	0.216534	0.219159	0.513776	0.541433	0.278921	0.615319	0.318613	0.453612
	108	0.588856	0.321524	0.305547	0.319576	0.326225	0.3549	0.192557	0.405219	0.262371	0.27793	0.33547	0.246117	0.17818	0.231202	0.236157	0.23801	0.229551	0.212283	0.218791	0.206998	0.221921	0.508823	0.609839	0.281771	0.562278	0.303371	0.453216
	109	0.557988	0.340247	0.309285	0.287718	0.296071	0.373351	0.212044	0.371411	0.324582	0.28079	0.335349	0.264464	0.165676	0.185932	0.215591	0.238626	0.234677	0.208398	0.250034	0.205492	0.218766	0.517711	0.582873	0.390286	0.617388	0.307869	0.483225
	110	0.585116	0.33145	0.35778	0.297236	0.319736	0.364125	0.202201	0.36453	0.27873	0.272014	0.337292	0.293404	0.161852	0.196299	0.246268	0.260908	0.239802	0.150757	0.201811	0.206308	0.21749	0.499433	0.545914	0.339676	0.561952	0.283715	0.446138
	111	0.53028	0.286842	0.320115	0.268131	0.345118	0.402872	0.220098	0.396443	0.323692	0.307572	0.340116	0.227069	0.170533	0.233506	0.218676	0.241357	0.224426	0.168624	0.188551	0.182467	0.206134	0.52002	0.589936	0.3089	0.60922	0.288463	0.463308
	112	0.597706	0.328799	0.325482	0.295977	0.330519	0.368107	0.205084	0.342689	0.272832	0.254723	0.332192	0.230311	0.173264	0.227401	0.235214	0.265312	0.233613	0.184472	0.225946	0.177574	0.217012	0.510289	0.580546	0.292486	0.591576	0.291211	0.453222
	113	0.526698	0.328348	0.330561	0.288819	0.265823	0.382576	0.209061	0.398438	0.254247	0.259143	0.324371	0.248524	0.169441	0.216458	0.233672	0.237746	0.214369	0.208554	0.209204	0.19169	0.214406	0.51996	0.556252	0.29032	0.616953	0.295542	0.455805
	114	0.524011	0.370305	0.325099	0.275997	0.32527	0.372088	0.185796	0.377495	0.31234	0.272079	0.334048	0.254338	0.174213	0.230742	0.257751	0.247081	0.223943	0.216012	0.211255	0.180146	0.22172	0.479409	0.567108	0.394845	0.655617	0.319196	0.483235
	115	0.575898	0.31549	0.318582	0.266243	0.366493	0.378789	0.195241	0.349172	0.266489	0.260119	0.329252	0.232182	0.179329	0.189272	0.240013	0.231493	0.22665	0.213215	0.206914	0.190247	0.212146	0.478902	0.592799	0.262279	0.633399	0.30537	0.45455
	116	0.578742	0.330829	0.312544	0.266558	0.355806	0.389374	0.184901	0.392155	0.257808	0.243607	0.331232	0.253302	0.164267	0.183397	0.208736	0.250516	0.229745	0.16272	0.189409	0.205053	0.205238	0.497351	0.552375	0.360308	0.612269	0.299207	0.464302
	117	0.603501	0.291241	0.310627	0.301798	0.328419	0.34247	0.218507	0.452191	0.284963	0.261549	0.339527	0.230611	0.169125	0.199409	0.22973	0.235456	0.218527	0.176548	0.193082	0.200787	0.205919	0.495047	0.580891	0.277895	0.578942	0.27397	0.441349
	118	0.595336	0.313573	0.300276	0.292595	0.330137	0.359756	0.194943	0.409109	0.291974	0.28378	0.337148	0.242107	0.171856	0.22406	0.23967	0.236865	0.22723	0.183229	0.209538	0.203359	0.215324	0.506464	0.594679	0.30149	0.629804	0.302205	0.466928
	119	0.588119	0.334495	0.336408	0.304315	0.296548	0.375196	0.206576	0.368619	0.304772	0.273834	0.338888	0.276495	0.175765	0.191806	0.240356	0.25078	0.206246	0.19659	0.193368	0.161952	0.210373	0.498701	0.612973	0.309014	0.603556	0.301289	0.465107
	120	0.559937	0.365399	0.298839	0.250589	0.310385	0.387238	0.183409	0.392853	0.268047	0.328243	0.334494	0.23392	0.175851	0.17879	0.227502	0.234663	0.225103	0.186492	0.19375	0.192066	0.205349	0.500161	0.512916	0.312889	0.607259	0.280384	0.442722
	121	0.558409	0.316562	0.312544	0.310136	0.333668	0.365097	0.197528	0.394448	0.269048	0.28274	0.334018	0.242842	0.18183	0.177177	0.225445	0.251837	0.210501	0.217565	0.212114	0.189619	0.212103	0.526263	0.534857	0.410918	0.635141	0.305537	0.482543
	122	0.633263	0.31081	0.311489	0.294483	0.331377	0.389957	0.19713	0.429453	0.283739	0.273444	0.345515	0.292402	0.172057	0.196068	0.230073	0.225151	0.219591	0.188045	0.22151	0.184789	0.21441	0.511583	0.521876	0.275046	0.597784	0.297874	0.440833
	123	0.574476	0.313122	0.295293	0.312889	0.356378	0.33004	0.219799	0.39405	0.297316	0.265124	0.335849	0.227871	0.177375	0.224176	0.241898	0.231405	0.238061	0.200785	0.209013	0.191062	0.215738	0.523618	0.585515	0.28975	0.6212	0.273721	0.458761
	124	0.597443	0.294286	0.302768	0.297629	0.329755	0.361018	0.185796	0.378891	0.27695	0.258103	0.328264	0.240837	0.195657	0.228438	0.230844	0.227353	0.226263	0.218808	0.20949	0.193886	0.219064	0.498139	0.593211	0.252362	0.613685	0.292627	0.450005
	125	0.500359	0.321468	0.317815	0.308878	0.27546	0.393355	0.207073	0.402526	0.301434	0.245883	0.327425	0.239501	0.180278	0.219798	0.225103	0.236072	0.222589	0.165051	0.206533	0.189996	0.209436	0.493471	0.564609	0.280517	0.616844	0.287796	0.448647
	126	0.588224	0.342052	0.302097	0.29936	0.269639	0.342761	0.191662	0.405817	0.29253	0.251408	0.328555	0.241773	0.17062	0.200907	0.243269	0.257826	0.213982	0.175616	0.220461	0.174437	0.210988	0.498249	0.51372	0.362929	0.611725	0.270889	0.451502
	127	0.596284	0.312445	0.322703	0.290156	0.257425	0.365291	0.200511	0.344684	0.270606	0.238797	0.31989	0.239534	0.151447	0.19987	0.246697	0.244615	0.233903	0.202184	0.197518	0.190184	0.211772	0.489085	0.53164	0.28861	0.591249	0.31245	0.442607
	128	0.584168	0.35491	0.320786	0.286066	0.278704	0.357036	0.219203	0.385672	0.261481	0.256998	0.330502	0.24448	0.165819	0.221641	0.232044	0.233959	0.226747	0.163031	0.207248	0.180523	0.208388	0.486049	0.527275	0.276185	0.620002	0.28105	0.438112
	129	0.588593	0.363764	0.283408	0.276705	0.236719	0.31829	0.17983	0.359444	0.280622	0.247313	0.313469	0.246117	0.178122	0.212887	0.253809	0.250076	0.212338	0.177325	0.205579	0.203735	0.215554	0.522042	0.53256	0.288382	0.622943	0.302372	0.45366
	130	0.569419	0.311374	0.261845	0.285201	0.252463	0.373836	0.212343	0.381783	0.323358	0.270974	0.32426	0.250863	0.1745	0.224982	0.216705	0.238626	0.19174	0.191774	0.193177	0.177637	0.206667	0.485542	0.517396	0.267636	0.592556	0.272388	0.427104
	131	0.572895	0.339007	0.293855	0.31344	0.272502	0.366456	0.176549	0.407014	0.265042	0.28443	0.329119	0.255007	0.142708	0.191461	0.227845	0.235632	0.229745	0.197212	0.200523	0.193948	0.208231	0.49184	0.559095	0.34378	0.594734	0.280217	0.453933
	132	0.572263	0.347297	0.315035	0.288898	0.273361	0.369175	0.223677	0.370115	0.263706	0.274875	0.32984	0.226802	0.161076	0.20275	0.208821	0.232461	0.211951	0.184627	0.191699	0.176194	0.199598	0.528958	0.570468	0.372276	0.61325	0.308369	0.478664
	133	0.565046	0.319212	0.296443	0.295899	0.221356	0.332468	0.194545	0.429752	0.274724	0.269414	0.319886	0.257747	0.182578	0.18478	0.241641	0.236072	0.215142	0.168935	0.224372	0.196144	0.211935	0.505114	0.404361	0.291916	0.617279	0.307869	0.425308
	134	0.550508	0.317126	0.308039	0.300618	0.264677	0.358008	0.200411	0.405119	0.281847	0.27897	0.326532	0.235657	0.149003	0.208048	0.221161	0.232109	0.22549	0.193483	0.186738	0.182154	0.20376	0.478174	0.493617	0.316309	0.616735	0.295626	0.440092
	135	0.559779	0.349383	0.334683	0.332948	0.266872	0.345577	0.214132	0.36074	0.270495	0.28391	0.331852	0.229809	0.156707	0.167385	0.205994	0.249459	0.240866	0.163186	0.205388	0.180523	0.199924	0.508685	0.581839	0.268662	0.629478	0.282966	0.454326
	136	0.522431	0.350455	0.328453	0.277413	0.259525	0.36432	0.187188	0.352762	0.294088	0.262979	0.319961	0.26941	0.176024	0.201713	0.259464	0.24074	0.243574	0.153398	0.204673	0.180836	0.214426	0.528649	0.614576	0.333293	0.612052	0.272971	0.472308
	137	0.606398	0.309738	0.300564	0.269862	0.232997	0.383742	0.206079	0.400831	0.300766	0.278775	0.328975	0.25357	0.176139	0.182591	0.207965	0.218546	0.206826	0.214613	0.208775	0.180773	0.205533	0.492656	0.688328	0.316081	0.5711	0.293293	0.472292
	138	0.572263	0.339514	0.307177	0.315407	0.239486	0.363543	0.202499	0.355056	0.275503	0.249068	0.321952	0.229642	0.179617	0.219222	0.224074	0.254127	0.225296	0.225023	0.210206	0.178076	0.216143	0.522955	0.637901	0.321324	0.637211	0.310284	0.485935
	139	0.590595	0.303366	0.33267	0.293853	0.259811	0.333827	0.192159	0.359942	0.264374	0.28391	0.321451	0.240303	0.167918	0.197105	0.227416	0.221541	0.223943	0.179811	0.208441	0.188553	0.206115	0.480612	0.69005	0.324972	0.609111	0.27422	0.475793
	140	0.615564	0.303704	0.30756	0.306518	0.274888	0.37034	0.192954	0.371012	0.304105	0.244452	0.32911	0.251565	0.150239	0.215306	0.211135	0.244791	0.222975	0.187579	0.211971	0.200536	0.210677	0.506948	0.643355	0.319614	0.553783	0.292211	0.463182
	141	0.581692	0.334777	0.338516	0.276469	0.252368	0.358299	0.18669	0.38278	0.276059	0.267204	0.325485	0.274122	0.176627	0.213808	0.233072	0.229907	0.224039	0.207156	0.200523	0.17381	0.214785	0.454175	0.632153	0.32292	0.623596	0.305787	0.467726
	142	0.576003	0.331675	0.300564	0.309035	0.272884	0.347423	0.16601	0.404222	0.257585	0.272274	0.323767	0.236894	0.159783	0.190885	0.2335	0.237129	0.229745	0.196901	0.203099	0.192192	0.208903	0.458018	0.587181	0.296247	0.599527	0.300206	0.448236
	143	0.510895	0.327953	0.320786	0.277413	0.394642	0.357134	0.203195	0.352762	0.270161	0.254593	0.326953	0.242475	0.183469	0.235119	0.208479	0.220924	0.202377	0.161477	0.190697	0.192819	0.204204	0.472549	0.602516	0.371592	0.636121	0.279801	0.472516
	144	0.591016	0.359647	0.304493	0.305417	0.342637	0.379663	0.192358	0.377395	0.282403	0.228591	0.336362	0.235724	0.160588	0.255623	0.247896	0.246641	0.192997	0.194571	0.219316	0.192317	0.216186	0.489329	0.577362	0.297501	0.614883	0.275303	0.450876
	145	0.591016	0.352654	0.326728	0.261287	0.305136	0.361115	0.183211	0.339299	0.281847	0.257453	0.325975	0.228239	0.157282	0.217955	0.21919	0.21881	0.211758	0.14796	0.192271	0.19514	0.198734	0.523074	0.589078	0.2869	0.579922	0.299457	0.455686
	146	0.560674	0.311768	0.335545	0.252635	0.292827	0.360338	0.201306	0.379389	0.284184	0.279035	0.32577	0.235925	0.164382	0.203326	0.216534	0.246024	0.246281	0.207932	0.191508	0.186294	0.210912	0.498327	0.597005	0.346401	0.624903	0.290795	0.471486
	147	0.522958	0.316957	0.320498	0.255309	0.326893	0.388209	0.21105	0.366425	0.293755	0.272989	0.327504	0.263395	0.188585	0.210928	0.236585	0.246289	0.228101	0.165361	0.217599	0.185353	0.2158	0.542361	0.616073	0.259885	0.601378	0.264226	0.456785
	148	0.468384	0.28735	0.295293	0.295663	0.292445	0.341402	0.174063	0.419879	0.271274	0.269804	0.311556	0.230244	0.165129	0.22959	0.231701	0.236689	0.215142	0.197057	0.197279	0.189494	0.210258	0.576738	0.648956	0.271854	0.594517	0.290128	0.476439
	149	0.413706	0.350342	0.293567	0.297865	0.273361	0.373254	0.205681	0.361737	0.299097	0.266684	0.313529	0.254104	0.166394	0.199409	0.199481	0.247698	0.217753	0.206845	0.199807	0.170171	0.206851	0.551291	0.637754	0.348795	0.587982	0.30537	0.486238
	150	0.548717	0.296542	0.307368	0.294561	0.289487	0.356065	0.188281	0.417585	0.287411	0.254658	0.324068	0.232683	0.162226	0.166233	0.22913	0.227089	0.227617	0.193172	0.216407	0.179142	0.203744	0.539104	0.605102	0.259087	0.585368	0.275386	0.452809
	151	0.54898	0.333142	0.321073	0.306203	0.246452	0.347325	0.185298	0.35346	0.270272	0.262524	0.317473	0.220018	0.15711	0.196644	0.248753	0.228234	0.230905	0.231859	0.212448	0.175692	0.211296	0.526074	0.60967	0.320526	0.605843	0.295376	0.471498
	152	0.583009	0.33004	0.318869	0.281032	0.235574	0.348199	0.205681	0.407114	0.309001	0.262459	0.328098	0.260521	0.175046	0.18501	0.209164	0.23299	0.218817	0.16474	0.167754	0.200975	0.201669	0.536196	0.597694	0.311179	0.53603	0.314782	0.459176
	153	0.569577	0.318648	0.286859	0.280638	0.273933	0.344315	0.192755	0.36832	0.281513	0.266489	0.318305	0.234154	0.159984	0.210928	0.21422	0.231228	0.232839	0.186958	0.209299	0.18435	0.207107	0.557755	0.557631	0.265357	0.617388	0.314032	0.462433
	154	0.57495	0.329758	0.299318	0.303686	0.245688	0.354803	0.198224	0.36074	0.277395	0.267854	0.321242	0.237061	0.17039	0.215766	0.22416	0.229819	0.195511	0.160079	0.235438	0.181903	0.20557	0.55811	0.566933	0.329645	0.630567	0.2818	0.473411
	155	0.588698	0.314306	0.308902	0.287954	0.257616	0.36063	0.160342	0.374104	0.2666	0.234572	0.315372	0.244714	0.183584	0.216688	0.229044	0.226384	0.21785	0.184472	0.202288	0.192317	0.210816	0.570554	0.613752	0.262621	0.649736	0.27497	0.474327
	156	0.556671	0.33207	0.29673	0.293303	0.274124	0.37238	0.198125	0.380287	0.245343	0.27806	0.322709	0.256043	0.146963	0.181669	0.211392	0.240564	0.217753	0.184316	0.200714	0.185291	0.202745	0.524291	0.615339	0.333293	0.61717	0.280217	0.474062
	157	0.525591	0.299192	0.305547	0.279458	0.225173	0.34616	0.171279	0.399235	0.275837	0.245623	0.30731	0.219583	0.180422	0.17614	0.216705	0.234927	0.201217	0.215235	0.21116	0.181401	0.204088	0.520637	0.565782	0.278465	0.599744	0.28663	0.450252
	158	0.552983	0.324006	0.331041	0.278672	0.275174	0.348297	0.202897	0.374204	0.309335	0.281895	0.32785	0.262091	0.165848	0.22095	0.220818	0.219867	0.208857	0.165828	0.191508	0.19627	0.205782	0.53568	0.546551	0.277667	0.608348	0.283965	0.450442
	159	0.553932	0.319607	0.320115	0.266007	0.268399	0.34315	0.20588	0.418383	0.267824	0.249263	0.321256	0.229709	0.162485	0.191461	0.241212	0.245848	0.214272	0.183229	0.224468	0.206057	0.210971	0.536035	0.560612	0.471558	0.620329	0.263143	0.490335
	160	0.602974	0.306975	0.322894	0.295348	0.275174	0.383936	0.185	0.356851	0.277395	0.241657	0.32482	0.260922	0.171568	0.213578	0.246697	0.244439	0.214079	0.222848	0.206962	0.172304	0.217044	0.569287	0.561938	0.254528	0.598655	0.278052	0.452492
		EPSC short term depression tau 200Hz				EPSC short term depression steady-state amplitude 200Hz
		WT (n=10)	Kv3.3 KO (n=9)	Kv3.1 KO (n=5)		WT (n=10)	Kv3.3 KO (n=9)	Kv3.1 KO (n=5)
		33.07	22.19	36.16		0.5895	0.2646	0.5273				15.4669
		21.77	6.907	33.06		0.3361	0.1794	0.5646				10.4695
		24.7	9.756	37.4		0.3173	0.2134	0.324				12.1184
		24.36	12.19	32.2		0.2986	0.2399	0.6228				11.6519
		33.03	15.17	24.95		0.321	0.249	0.307				12.3378
		22.25	12.83			0.3812	0.2305					8.92292
		16.94	9.338			0.2051	0.1951					6.66955
		33.05	14.4			0.3991	0.2221					12.0178
		23.52	13.65			0.2875	0.1943					9.41295
		21.35				0.2787						10.8144
	Average	25.404	12.9368	32.754		0.34141	0.220922	0.46914				12.021
	One way ANOVA & Tukey’s multiple comparisons		P=<0.0001 compared to WT	P=0.0384 Compared to WT			P=0.0279 compared to WT	P=0.0535 Compared to WT
Figure 4G		Normalised EPSC amplitudes 600Hz
	Stimulus number	WT (n=10)										Average	Kv3.3 KO (n=8)									Average	Kv3.1 KO (n=5)					Average
	1	1	1	1	1	1	1	1	1	1	1	1	1	1	1	1	1	1	1	1		1	1	1	1	1	1	1
	2	0.929347	0.904453	0.873106	0.917806	0.86831	0.91199	0.8706	0.807664	0.899902	0.861427	0.884461	0.712886	0.374163	0.637623	0.722969	0.727835	0.781034	0.526195	0.79463		0.659667	0.897199	0.879832	0.988676	0.959629	0.800678	0.905203
	3	0.847239	0.716207	0.702489	0.792643	0.743059	0.637683	0.71051	0.523474	0.772042	0.735119	0.718047	0.484287	0.261534	0.390189	0.442462	0.449111	0.520218	0.287143	0.421446		0.407049	0.74935	0.764888	0.904432	0.873438	0.578374	0.774096
	4	0.770159	0.559643	0.588957	0.614111	0.498731	0.558548	0.538162	0.388962	0.644279	0.536635	0.569819	0.287507	0.198616	0.267139	0.314018	0.256604	0.362349	0.189274	0.308393		0.272988	0.677505	0.682892	0.824779	0.800965	0.44293	0.685814
	5	0.666227	0.436561	0.448791	0.51892	0.540011	0.453628	0.452172	0.283647	0.609577	0.484734	0.489427	0.228268	0.105753	0.22516	0.251218	0.199419	0.29281	0.174396	0.23296		0.213748	0.539705	0.595351	0.75538	0.751741	0.32368	0.593171
	6	0.588887	0.38404	0.442065	0.446207	0.31994	0.414761	0.348855	0.270092	0.457084	0.392588	0.406452	0.185363	0.137395	0.190621	0.214328	0.180305	0.258585	0.164311	0.198679		0.191198	0.375108	0.451298	0.680777	0.718277	0.297344	0.504561
	7	0.497708	0.332818	0.426067	0.392303	0.395796	0.359264	0.30904	0.237388	0.454444	0.32173	0.372656	0.147389	0.12337	0.170298	0.18905	0.151113	0.220457	0.135215	0.170175		0.163383	0.365521	0.464307	0.639688	0.695221	0.27616	0.488179
	8	0.445042	0.331019	0.361074	0.329072	0.338639	0.437464	0.303233	0.202694	0.434112	0.337848	0.35202	0.149902	0.076853	0.141867	0.177754	0.148393	0.158907	0.144308	0.144752		0.142842	0.351429	0.378579	0.606251	0.683839	0.244916	0.453003
	9	0.374493	0.276349	0.340895	0.306516	0.226619	0.136156	0.275492	0.194541	0.410554	0.283513	0.282513	0.128575	0.101766	0.170964	0.147026	0.132398	0.193767	0.151912	0.148283		0.146836	0.32082	0.385616	0.566386	0.66234	0.22406	0.431844
	10	0.310268	0.254361	0.309899	0.30988	0.279277	0.39075	0.269501	0.17435	0.355714	0.260806	0.291481	0.136333	0.114434	0.142867	0.168196	0.143755	0.212377	0.151912	0.132298		0.150272	0.27635	0.28656	0.56302	0.646581	0.227904	0.400083
	11	0.322761	0.252512	0.303445	0.259723	0.265958	0.254904	0.265814	0.153591	0.35982	0.247628	0.268616	0.12669	0.098203	0.129207	0.142523	0.117362	0.189772	0.151747	0.125621		0.135141	0.264337	0.306606	0.524303	0.638604	0.209665	0.388703
	12	0.380765	0.250114	0.309626	0.265534	0.178723	0.279196	0.252543	0.157193	0.378295	0.256751	0.270874	0.123957	0.106516	0.111771	0.154609	0.138396	0.136756	0.133066	0.108288		0.12667	0.237886	0.287413	0.517799	0.635783	0.202713	0.376319
	13	0.274035	0.195144	0.300627	0.253301	0.232528	0.374587	0.264616	0.148472	0.329615	0.243371	0.26163	0.123486	0.075722	0.130428	0.131464	0.12224	0.15464	0.102978	0.120549		0.120188	0.276697	0.212454	0.455745	0.595898	0.213345	0.350828
	14	0.314519	0.173106	0.26754	0.234033	0.108248	0.056741	0.224524	0.150557	0.340856	0.234754	0.210488	0.126627	0.095658	0.119434	0.140311	0.125999	0.17325	0.105458	0.128831		0.126946	0.228299	0.24924	0.460183	0.615646	0.184392	0.347552
	15	0.275849	0.23887	0.27063	0.246802	0.200863	0.352444	0.248119	0.141173	0.308011	0.214581	0.249734	0.113247	0.091275	0.118768	0.132096	0.120001	0.118146	0.0993408	0.120742		0.114202	0.246549	0.229088	0.410141	0.5851	0.189136	0.332003
	16	0.301612	0.230924	0.280629	0.228222	0.155702	0.176331	0.246091	0.137191	0.299702	0.203937	0.226034	0.107467	0.087401	0.112326	0.162429	0.110964	0.148558	0.116534	0.111497		0.119647	0.212821	0.260223	0.46309	0.582571	0.197233	0.343188
	17	0.26403	0.172057	0.275448	0.219582	0.196364	0.244067	0.222681	0.127048	0.301951	0.214176	0.22374	0.116702	0.089889	0.109439	0.115665	0.098247	0.107252	0.107276	0.105463		0.106242	0.204043	0.267687	0.389176	0.558543	0.17564	0.319018
	18	0.32219	0.157315	0.234725	0.196645	0.131975	0.167642	0.227474	0.115484	0.272039	0.174337	0.199983	0.106871	0.088051	0.083896	0.120958	0.104085	0.142929	0.127776	0.0989788		0.109193	0.194109	0.188676	0.401036	0.485777	0.160264	0.285972
	19	0.268488	0.214033	0.235271	0.169043	0.207214	0.257614	0.217059	0.135106	0.298334	0.184677	0.218684	0.100652	0.069105	0.095557	0.111557	0.113683	0.092091	0.121328	0.102831		0.100851	0.177014	0.138348	0.354515	0.562726	0.163617	0.279244
	20	0.249361	0.192096	0.273357	0.199091	0.138678	0.090189	0.203695	0.102971	0.282009	0.200389	0.193184	0.093082	0.071961	0.090115	0.119299	0.091289	0.116148	0.0796678	0.106362		0.0959904	0.20566	0.189529	0.364538	0.465543	0.161164	0.277287
	21	0.230596	0.152417	0.252814	0.196645	0.196364	0.273964	0.200746	0.118801	0.29413	0.179811	0.209629	0.094809	0.071481	0.103553	0.112189	0.08881	0.14538	0.113228	0.107902		0.104669	0.19769	0.261822	0.368746	0.522354	0.155029	0.301128
	22	0.31426	0.214933	0.235271	0.151839	0.122625	0.103082	0.212819	0.104488	0.268226	0.165417	0.189296	0.085889	0.061357	0.090004	0.115823	0.093608	0.101623	0.101655	0.103088		0.0941309	0.176321	0.178014	0.318782	0.422837	0.160918	0.251374
	23	0.242518	0.20139	0.263268	0.169043	0.166551	0.274337	0.220469	0.090648	0.262166	0.167444	0.205783	0.091291	0.060481	0.068348	0.113295	0.097527	0.113425	0.104631	0.0933936		0.092799	0.184522	0.169057	0.334238	0.340246	0.149713	0.235555
	24	0.220695	0.14732	0.244815	0.192363	0.095634	0.135409	0.202497	0.095767	0.23499	0.157408	0.17269	0.083125	0.054486	0.095446	0.098918	0.082891	0.08964	0.0743776	0.0833787		0.0827828	0.135663	0.22429	0.289094	0.448519	0.163944	0.252302
	25	0.258743	0.188947	0.246542	0.188693	0.130652	0.17876	0.212359	0.104298	0.248969	0.185893	0.194386	0.095783	0.050753	0.086339	0.103342	0.08737	0.134123	0.0957038	0.0901837		0.0929497	0.146867	0.157115	0.271648	0.258725	0.15184	0.197239
	26	0.233965	0.206637	0.231362	0.184182	0.097134	0.153347	0.185907	0.093207	0.237727	0.152543	0.177601	0.086643	0.054373	0.100221	0.103263	0.090089	0.117056	0.102978	0.0874232		0.0927558	0.154375	0.11521	0.254509	0.387038	0.114952	0.205217
	27	0.216963	0.153467	0.20682	0.197944	0.10913	0.16568	0.178995	0.092449	0.213192	0.165721	0.170036	0.085732	0.052902	0.090892	0.100182	0.082971	0.097084	0.0849581	0.102446		0.0871458	0.150448	0.192302	0.314267	0.299583	0.131801	0.21768
	28	0.192237	0.098847	0.19273	0.112845	0.075435	0.13382	0.197336	0.071026	0.226388	0.157206	0.145787	0.091637	0.067776	0.078343	0.084936	0.080092	0.096721	0.0783453	0.0794626		0.0821641	0.152411	0.210748	0.280983	0.365539	0.143988	0.230734
	29	0.226034	0.189397	0.208183	0.148628	0.145294	0.249018	0.172359	0.082875	0.204687	0.1642	0.179068	0.082183	0.061555	0.090337	0.114638	0.079372	0.12559	0.0819823	0.0920454		0.0909628	0.127346	0.072026	0.26086	0.221078	0.111354	0.158533
	30	0.21857	0.178753	0.218546	0.147787	0.078611	0.106633	0.19623	0.109701	0.217102	0.165417	0.163735	0.073294	0.053298	0.076788	0.112426	0.091609	0.092999	0.0852887	0.100841		0.0858179	0.151603	0.150824	0.256651	0.240631	0.111681	0.182278
	31	0.20841	0.14782	0.207092	0.154286	0.11892	0.181749	0.145908	0.079083	0.212605	0.153556	0.160943	0.078853	0.063026	0.092891	0.106028	0.101846	0.117329	0.0905789	0.0866528		0.0921506	0.110829	0.200299	0.2389	0.319233	0.115934	0.197039
	32	0.193015	0.144472	0.18864	0.124314	0.152438	0.05861	0.158534	0.077472	0.202341	0.158118	0.145795	0.082937	0.062573	0.080231	0.09718	0.119361	0.088188	0.0763615	0.0815811		0.0860516	0.150101	0.120328	0.23186	0.285866	0.105874	0.178806
	33	0.220903	0.166709	0.186004	0.17493	0.080904	0.219682	0.169133	0.068087	0.196574	0.145345	0.162827	0.104923	0.057342	0.098111	0.11922	0.107444	0.111155	0.0933893	0.0916602		0.0979056	0.140052	0.180786	0.246628	0.433927	0.09565	0.219409
	34	0.188712	0.1836	0.194548	0.163079	0.141589	0.042634	0.164433	0.088847	0.170181	0.156901	0.149452	0.086769	0.060028	0.104108	0.110135	0.107604	0.099535	0.0753695	0.0962825		0.0924789	0.105516	0.137495	0.26216	0.210474	0.110372	0.165203
	35	0.183114	0.145571	0.199911	0.114375	0.078964	0.23108	0.153097	0.093207	0.199604	0.178291	0.157721	0.10954	0.057144	0.149863	0.10587	0.112883	0.11751	0.0747083	0.0890923		0.102076	0.123072	0.144106	0.231707	0.445114	0.122477	0.213295
	36	0.193326	0.094299	0.167824	0.102065	0.151556	0.093833	0.147659	0.082685	0.184159	0.12649	0.13439	0.102253	0.066334	0.094224	0.104369	0.108244	0.089277	0.0770227	0.0811317		0.0903569	0.139243	0.162873	0.2591	0.379742	0.137117	0.215615
	37	0.211883	0.154466	0.153826	0.148322	0.084432	0.190719	0.169318	0.088278	0.196378	0.162781	0.15604	0.093773	0.076344	0.096112	0.122379	0.103446	0.109794	0.0856193	0.10726		0.099341	0.156916	0.163512	0.238134	0.407856	0.112662	0.215816
	38	0.229404	0.173656	0.207183	0.154057	0.111952	0.122889	0.152267	0.092733	0.173602	0.141899	0.155964	0.113121	0.059632	0.095224	0.122142	0.100966	0.087189	0.0871072	0.0998134		0.0956493	0.120069	0.167351	0.233467	0.474979	0.132046	0.225582
	39	0.208721	0.092001	0.217546	0.16759	0.105249	0.22183	0.157336	0.089984	0.186701	0.131762	0.157872	0.109698	0.076259	0.119656	0.116218	0.120481	0.123411	0.103143	0.101868		0.108842	0.098585	0.167031	0.232013	0.301334	0.15323	0.190439
	40	0.205663	0.133678	0.200638	0.16025	0.139208	0.050855	0.16388	0.097947	0.173993	0.155685	0.14818	0.10508	0.060735	0.100776	0.110846	0.119921	0.112517	0.108268	0.0957047		0.101731	0.135663	0.156155	0.273638	0.502023	0.128284	0.239153
	41	0.245214	0.149669	0.173369	0.11101	0.056912	0.223045	0.156507	0.092923	0.189633	0.149299	0.154758	0.102505	0.07691	0.107107	0.11527	0.125759	0.135031	0.0723938	0.104243		0.104902	0.133006	0.147412	0.279529	0.384995	0.151512	0.219291
	42	0.212039	0.154466	0.202456	0.184564	0.146088	0.138118	0.159179	0.083159	0.180445	0.148893	0.160941	0.105866	0.100663	0.106107	0.127988	0.12248	0.104256	0.0778493	0.0797836		0.103124	0.102974	0.168204	0.268894	0.435191	0.143579	0.223768
	43	0.208721	0.149969	0.201002	0.176842	0.161171	0.166147	0.148857	0.095577	0.196769	0.171904	0.167696	0.113718	0.089069	0.125986	0.118351	0.1228	0.135485	0.077188	0.0879368		0.108817	0.147791	0.115637	0.243031	0.399489	0.140798	0.209349
	44	0.232877	0.155166	0.183368	0.167284	0.112658	0.097663	0.155769	0.097189	0.194325	0.16197	0.155827	0.11331	0.082565	0.110883	0.117798	0.135997	0.082287	0.0831395	0.100199		0.103272	0.151718	0.194221	0.247852	0.34725	0.147505	0.217709
	45	0.226397	0.116687	0.205365	0.182576	0.11107	0.21202	0.166645	0.077187	0.187972	0.156395	0.164231	0.10128	0.091699	0.115325	0.112347	0.115122	0.132398	0.0877685	0.10129		0.107154	0.148368	0.139628	0.275627	0.408342	0.1336	0.221113
	46	0.226138	0.193295	0.193548	0.137389	0.131446	0.124291	0.161484	0.095956	0.192761	0.166836	0.162314	0.105049	0.084658	0.111549	0.110846	0.110884	0.111428	0.100002	0.108288		0.105338	0.128848	0.178973	0.250606	0.488501	0.147341	0.238854
	47	0.230492	0.209036	0.172187	0.146182	0.138767	0.124945	0.149963	0.108848	0.179369	0.142912	0.16027	0.106368	0.089663	0.090115	0.13257	0.120241	0.122322	0.0947119	0.108544		0.108067	0.157725	0.188463	0.239818	0.397933	0.156011	0.22799
	48	0.220799	0.120835	0.191003	0.172483	0.146088	0.138679	0.161391	0.106383	0.193446	0.1494	0.160051	0.104232	0.073743	0.121988	0.124117	0.116242	0.099535	0.101986	0.10129		0.105392	0.175628	0.164685	0.250377	0.496186	0.150613	0.247498
	49	0.20079	0.160963	0.158734	0.17753	0.132504	0.144471	0.174755	0.105625	0.196671	0.124564	0.157661	0.107781	0.087542	0.122766	0.114243	0.101526	0.141113	0.0889257	0.0939714		0.107234	0.118799	0.13323	0.266522	0.445892	0.150122	0.222913
	50	0.225827	0.14717	0.183459	0.148781	0.139913	0.184365	0.165539	0.105151	0.20762	0.14271	0.165053	0.094684	0.076288	0.121433	0.125223	0.120081	0.129947	0.109591	0.0979517		0.1094	0.137395	0.126833	0.261854	0.330129	0.155438	0.20233
	51	0.230959	0.167359	0.194548	0.174471	0.147058	0.158766	0.188488	0.105151	0.19892	0.145649	0.171137	0.12826	0.075326	0.108328	0.117166	0.129279	0.117601	0.0793372	0.100841		0.107017	0.165002	0.238791	0.245939	0.428868	0.155765	0.246873
	52	0.240186	0.204489	0.180459	0.124008	0.104278	0.108034	0.17153	0.103635	0.20762	0.161869	0.160611	0.109478	0.089635	0.111216	0.118904	0.103526	0.137391	0.107276	0.107774		0.11065	0.127808	0.240177	0.273408	0.455717	0.164026	0.252227
	53	0.263667	0.16501	0.191003	0.132419	0.142471	0.184365	0.181207	0.104962	0.191784	0.143216	0.17001	0.108315	0.075892	0.10111	0.111636	0.099687	0.102259	0.0894217	0.0910183		0.0974174	0.186832	0.073413	0.270577	0.428965	0.150531	0.222064
	54	0.229715	0.159114	0.194457	0.121562	0.152086	0.189224	0.156507	0.099558	0.215049	0.143014	0.166029	0.103604	0.099532	0.127652	0.121748	0.100486	0.135394	0.0857846	0.101739		0.109493	0.173087	0.216932	0.214874	0.421377	0.161491	0.237552
	55	0.239616	0.196693	0.200638	0.191369	0.181281	0.055714	0.18388	0.094629	0.209575	0.178696	0.173209	0.102096	0.088588	0.093002	0.123801	0.117522	0.087098	0.0885951	0.115221		0.10199	0.139012	0.234419	0.241272	0.288395	0.14685	0.20999
	56	0.239408	0.172057	0.216637	0.199397	0.137091	0.137277	0.173465	0.084486	0.179174	0.136425	0.167542	0.099898	0.081123	0.115214	0.111557	0.100406	0.13839	0.0874378	0.0978875		0.103989	0.146058	0.075225	0.231018	0.370694	0.165989	0.197797
	57	0.268644	0.223878	0.187549	0.174318	0.11257	0.26406	0.183142	0.110744	0.21241	0.182751	0.192007	0.106305	0.089663	0.094779	0.106344	0.101366	0.08619	0.0889257	0.0945492		0.0960152	0.172625	0.190382	0.263767	0.359507	0.168688	0.230994
	58	0.248013	0.149369	0.208819	0.175159	0.137973	0.053939	0.170147	0.098895	0.217493	0.150211	0.161002	0.094275	0.080105	0.099777	0.125539	0.098087	0.120597	0.0842968	0.0901195		0.0990995	0.14063	0.205417	0.231784	0.34725	0.155684	0.216153
	59	0.241482	0.076959	0.182732	0.063759	0.137708	0.213142	0.184248	0.073301	0.170278	0.1494	0.149301	0.099395	0.087486	0.103553	0.116771	0.103766	0.079109	0.0765268	0.107132		0.0967173	0.163731	0.154236	0.229106	0.32828	0.149877	0.205046
	60	0.245732	0.207487	0.227908	0.121026	0.158172	0.163437	0.163419	0.066381	0.210161	0.149299	0.171302	0.100494	0.07083	0.108995	0.109266	0.109604	0.131218	0.085454	0.100712		0.102072	0.115218	0.242096	0.224897	0.349196	0.154948	0.217271
	61	0.230285	0.229825	0.218	0.187699	0.146088	0.228931	0.156691	0.071879	0.226095	0.140784	0.183628	0.085638	0.07855	0.086561	0.10271	0.118801	0.082468	0.12199	0.109828		0.0983182	0.158418	0.172256	0.238593	0.317774	0.133846	0.204177
	62	0.225568	0.120685	0.189185	0.204673	0.194777	0.147928	0.174479	0.103635	0.186701	0.137337	0.168497	0.09927	0.094329	0.087561	0.122695	0.08617	0.130855	0.102647	0.101932		0.103182	0.151141	0.227275	0.229259	0.265924	0.15233	0.205186
	63	0.271132	0.195544	0.205456	0.133031	0.135679	0.176517	0.173557	0.0806	0.196867	0.169167	0.173755	0.095438	0.084884	0.102664	0.105633	0.099447	0.095813	0.117857	0.085754		0.0984362	0.134854	0.091006	0.211966	0.331101	0.14456	0.182697
	64	0.216134	0.149519	0.20682	0.13066	0.099427	0.11719	0.187935	0.059745	0.208109	0.140784	0.151632	0.082434	0.072301	0.098222	0.118746	0.110724	0.107615	0.0960344	0.10328		0.0986696	0.163846	0.19582	0.204927	0.197438	0.142597	0.180926
	65	0.219399	0.154966	0.204729	0.138153	0.114246	0.094113	0.159087	0.083254	0.177121	0.145244	0.149031	0.084067	0.082565	0.078898	0.117008	0.101846	0.072846	0.0864459	0.0921738		0.0894812	0.159226	0.1263	0.226963	0.384119	0.136954	0.206712
	66	0.218829	0.16516	0.224545	0.187164	0.15826	0.279383	0.187935	0.086856	0.1911	0.142406	0.184164	0.071378	0.08774	0.091004	0.112821	0.105685	0.104165	0.0846274	0.0994282		0.0946061	0.160612	0.217572	0.23515	0.31505	0.134664	0.21261
	67	0.226812	0.158414	0.194276	0.097477	0.112129	0.093739	0.164525	0.08951	0.202341	0.13977	0.147899	0.087617	0.070632	0.089893	0.122458	0.099767	0.090366	0.0935547	0.100006		0.0942867	0.127115	0.130138	0.216098	0.206875	0.138753	0.163796
	68	0.233395	0.151368	0.166642	0.143735	0.180664	0.187542	0.185262	0.048465	0.185723	0.167647	0.165044	0.088559	0.074054	0.089671	0.110372	0.099447	0.091819	0.089091	0.102317		0.0931663	0.160266	0.19742	0.218011	0.345013	0.135891	0.21132
	69	0.194777	0.122484	0.174823	0.187164	0.152438	0.165586	0.205631	0.103919	0.18455	0.142406	0.163378	0.082151	0.081293	0.098	0.096943	0.093448	0.114424	0.0743776	0.0878726		0.0910636	0.144672	0.127899	0.209441	0.239853	0.14137	0.172647
	70	0.211831	0.237271	0.197184	0.166902	0.09634	0.158579	0.181852	0.088847	0.185625	0.149806	0.167424	0.082874	0.078946	0.099666	0.098918	0.099527	0.081561	0.0942159	0.0800404		0.0894685	0.181288	0.154023	0.213573	0.314272	0.139162	0.200464
	71	0.229611	0.177304	0.186095	0.064982	0.130387	0.116069	0.179179	0.055764	0.190806	0.149299	0.14795	0.088904	0.071367	0.09278	0.104053	0.101766	0.115422	0.0897523	0.112974		0.0971273	0.13624	0.162659	0.209594	0.264951	0.13311	0.181311
	72	0.218363	0.142123	0.215546	0.100688	0.065909	0.1597	0.179917	0.04382	0.180933	0.131052	0.143805	0.089941	0.079313	0.109661	0.105001	0.097847	0.104074	0.0561925	0.0940356		0.0920081	0.137973	0.247961	0.210971	0.347542	0.138508	0.216591
	73	0.231633	0.161163	0.206183	0.171948	0.174666	0.167361	0.155124	0.073111	0.188656	0.139466	0.166931	0.079701	0.083216	0.090226	0.096391	0.098567	0.067853	0.0728897	0.11413		0.0878717	0.177938	0.111159	0.197046	0.23888	0.129347	0.170874
	74	0.226501	0.150868	0.196185	0.181123	0.084697	0.111211	0.157244	0.050171	0.176437	0.140682	0.147512	0.082811	0.078324	0.106107	0.098128	0.096088	0.116512	0.0791719	0.0810675		0.0922762	0.127577	0.209895	0.198193	0.211058	0.123377	0.17402
	75	0.245473	0.149169	0.182913	0.158033	0.156849	0.181095	0.16388	0.046664	0.189145	0.148285	0.162151	0.067734	0.075637	0.096445	0.100735	0.094488	0.085555	0.0702446	0.0896059		0.0850556	0.14063	0.179826	0.200183	0.220786	0.122559	0.172797
	76	0.224065	0.208087	0.179823	0.106423	0.110541	0.138959	0.154571	0.077472	0.179076	0.133282	0.15123	0.089627	0.071028	0.096889	0.106265	0.110804	0.133942	0.08595	0.108673		0.100397	0.135547	0.086208	0.193985	0.253472	0.126239	0.15909
	77	0.223183	0.096948	0.180368	0.092737	0.138414	0.155963	0.154571	0.088183	0.180347	0.124564	0.143528	0.079136	0.072697	0.078565	0.112584	0.106725	0.105799	0.0720632	0.0930084		0.0900722	0.114756	0.12374	0.231171	0.252596	0.130983	0.170649
	78	0.203123	0.066565	0.188822	0.140753	0.100574	0.152413	0.132267	0.047801	0.202928	0.120104	0.135535	0.077723	0.059661	0.077677	0.120563	0.102886	0.088278	0.0644585	0.0871664		0.0848016	0.167658	0.244869	0.170954	0.242576	0.127221	0.190656
	79	0.203641	0.16601	0.178823	0.110475	0.108953	0.139613	0.180285	0.084012	0.191295	0.149907	0.151301	0.074016	0.072357	0.090226	0.112268	0.097527	0.107615	0.0940506	0.0897343		0.0922242	0.171239	0.076505	0.189011	0.253764	0.11667	0.161438
	80	0.194259	0.187748	0.19064	0.14557	0.173872	0.154468	0.168857	0.090458	0.182497	0.125984	0.161435	0.082874	0.068427	0.076344	0.101051	0.102886	0.123502	0.0831395	0.0775367		0.08947	0.119607	0.21352	0.189164	0.182263	0.126485	0.166208
	81	0.227175	0.133078	0.167733	0.184029	0.114951	0.173247	0.161299	0.044957	0.192859	0.137641	0.153697	0.085889	0.076627	0.092114	0.095522	0.102646	0.077294	0.111574	0.0940998		0.0919708	0.149408	0.153276	0.208752	0.31398	0.124522	0.189988
	82	0.201257	0.125082	0.170642	0.118197	0.170697	0.173995	0.174018	0.057186	0.165684	0.183663	0.154042	0.092359	0.059717	0.111216	0.101604	0.08833	0.100625	0.0948772	0.0896701		0.0922998	0.157031	0.095911	0.162307	0.21349	0.135645	0.152877
	83	0.190786	0.209386	0.201093	0.197638	0.069614	0.046277	0.151069	0.071689	0.201657	0.143622	0.148283	0.078225	0.073036	0.087228	0.100419	0.092489	0.130038	0.0905789	0.0853046		0.0921648	0.117297	0.16106	0.179906	0.301334	0.130002	0.17792
	84	0.215149	0.161013	0.187367	0.1026	0.180752	0.24388	0.162405	0.053204	0.172722	0.119192	0.159828	0.082026	0.068823	0.093891	0.096232	0.105845	0.066854	0.0723938	0.0955763		0.0852051	0.114063	0.210535	0.175621	0.189948	0.117979	0.161629
	85	0.194414	0.134078	0.184277	0.137771	0.13859	0.053565	0.164525	0.058703	0.160503	0.115036	0.134146	0.091825	0.065344	0.084784	0.109029	0.08561	0.111882	0.0690874	0.0908257		0.0885484	0.160959	0.109666	0.192072	0.398322	0.132292	0.198662
	86	0.215771	0.121285	0.209274	0.157039	0.054531	0.256493	0.163511	0.093681	0.186701	0.130849	0.158913	0.075084	0.075864	0.096778	0.11448	0.103686	0.095813	0.0770227	0.0770873		0.0894769	0.105631	0.166391	0.193296	0.207556	0.128121	0.160199
	87	0.197369	0.200391	0.18764	0.145188	0.124036	0.050669	0.106092	0.065812	0.220621	0.149197	0.144701	0.076058	0.066164	0.105219	0.118746	0.090089	0.079745	0.0869419	0.0901195		0.0891353	0.155068	0.122141	0.185262	0.186932	0.130083	0.155897
	88	0.218311	0.151568	0.180732	0.137312	0.174754	0.243319	0.174202	0.048275	0.20371	0.141595	0.167378	0.078445	0.075157	0.094557	0.112505	0.103046	0.087189	0.0633012	0.0905689		0.0880961	0.116258	0.130351	0.161313	0.235572	0.124195	0.153538
	89	0.200272	0.127781	0.176641	0.188463	0.13762	0.055527	0.127198	0.09207	0.173309	0.155989	0.143487	0.07455	0.069784	0.114547	0.104922	0.083211	0.111155	0.0816517	0.0903121		0.0912666	0.156685	0.122568	0.170189	0.215435	0.125176	0.158011
	90	0.204678	0.153467	0.180732	0.12225	0.065821	0.219028	0.170424	0.09406	0.140464	0.123956	0.147488	0.084507	0.072442	0.082674	0.09331	0.08849	0.080834	0.0793372	0.086396		0.0834988	0.097083	0.181426	0.175239	0.196368	0.130247	0.156073
	91	0.194311	0.180402	0.20182	0.133642	0.145294	0.092712	0.16729	0.075197	0.160992	0.137134	0.148879	0.083942	0.068794	0.10644	0.110688	0.093208	0.08619	0.0791719	0.0902479		0.0898352	0.143517	0.115637	0.180212	0.215046	0.128529	0.156588
	92	0.204937	0.069513	0.187822	0.156886	0.133474	0.198099	0.158258	0.061641	0.158157	0.148893	0.147768	0.0781	0.074733	0.097112	0.104211	0.094488	0.123502	0.0917361	0.0726576		0.0920675	0.188565	0.114464	0.185645	0.17341	0.116834	0.155784
	93	0.226708	0.216682	0.173187	0.14687	0.124742	0.178853	0.181391	0.051214	0.184843	0.129227	0.161372	0.082591	0.066476	0.078121	0.111557	0.08905	0.077475	0.0940506	0.0862034		0.0856905	0.096737	0.144319	0.168046	0.227304	0.117406	0.150762
	94	0.214838	0.14797	0.175369	0.070563	0.14794	0.137371	0.132912	0.050266	0.169203	0.135614	0.138205	0.073702	0.070774	0.081453	0.096391	0.106245	0.113062	0.0737163	0.0801046		0.086931	0.139474	0.236125	0.192608	0.226233	0.139898	0.186868
	95	0.195399	0.153667	0.200093	0.132037	0.052149	0.17577	0.173557	0.062305	0.175068	0.154164	0.147421	0.092422	0.071283	0.08434	0.096785	0.100646	0.1117	0.0811557	0.0730428		0.0889218	0.131967	0.100602	0.165827	0.157554	0.114789	0.134148
	96	0.212194	0.148869	0.188822	0.181276	0.156584	0.18885	0.155862	0.075576	0.179858	0.149501	0.163739	0.070875	0.069869	0.102442	0.093942	0.093048	0.065492	0.0641278	0.0892849		0.0811351	0.110251	0.222477	0.185568	0.238588	0.117324	0.174842
	97	0.248479	0.065166	0.186458	0.104511	0.134797	0.147835	0.174295	0.076429	0.156691	0.145852	0.144051	0.074393	0.054938	0.08745	0.097496	0.082731	0.096267	0.0755349	0.0842775		0.0816359	0.111868	0.138775	0.188093	0.191213	0.128938	0.151777
	98	0.182648	0.196843	0.18255	0.184717	0.11548	0.095514	0.13835	0.049602	0.160601	0.134195	0.14405	0.07744	0.066249	0.089338	0.109661	0.098087	0.097538	0.0702446	0.0918528		0.0875513	0.147907	0.068934	0.175315	0.186349	0.110454	0.137792
	99	0.198665	0.205888	0.174096	0.12722	0.150498	0.177078	0.167935	0.09207	0.175752	0.128011	0.159721	0.080895	0.061979	0.107773	0.097496	0.093048	0.098809	0.0821476	0.0924306		0.0893223	0.110829	0.215653	0.171183	0.232654	0.12305	0.170674
	100	0.182026	0.095999	0.170006	0.142206	0.094135	0.135876	0.134018	0.103824	0.15454	0.128011	0.134064	0.071378	0.06526	0.077566	0.104685	0.082171	0.10825	0.0880991	0.0764453		0.0842318	0.114525	0.197526	0.1594	0.221272	0.139816	0.166508
	101	0.194777	0.136826	0.186186	0.125232	0.124742	0.155589	0.182589	0.022586	0.146525	0.130748	0.14058	0.068206	0.065514	0.098	0.103184	0.089929	0.114605	0.0876032	0.0905047		0.0896932	0.115796	0.125766	0.164067	0.174091	0.122313	0.140407
	102	0.209862	0.118736	0.165188	0.159944	0.145117	0.149703	0.130977	0.115105	0.182888	0.132573	0.151009	0.074268	0.059547	0.088782	0.094574	0.100326	0.076931	0.0705753	0.0763811		0.080173	0.13855	0.152956	0.167204	0.251526	0.119696	0.165986
	103	0.22873	0.139075	0.178187	0.13196	0.129152	0.151665	0.149779	0.063537	0.162947	0.128518	0.146355	0.069431	0.069756	0.086783	0.103737	0.091369	0.100988	0.0801638	0.0761885		0.084802	0.108172	0.218958	0.183885	0.207069	0.122886	0.168194
	104	0.200427	0.153667	0.191367	0.109481	0.080022	0.137464	0.17752	0.072258	0.155029	0.140581	0.141782	0.076937	0.06328	0.093891	0.104132	0.092249	0.107161	0.0963651	0.0872306		0.0901557	0.162114	0.172149	0.159782	0.19345	0.104238	0.158347
	105	0.206544	0.203389	0.178732	0.138459	0.125448	0.135035	0.162221	0.052636	0.170278	0.125071	0.149781	0.06852	0.064835	0.082341	0.090624	0.103845	0.120143	0.0677649	0.0994282		0.0871876	0.102859	0.159247	0.164756	0.176426	0.132783	0.147214
	106	0.188609	0.152617	0.157098	0.134254	0.131975	0.197819	0.143235	0.04619	0.156886	0.155482	0.146417	0.061358	0.071961	0.10322	0.089518	0.08761	0.103257	0.0680955	0.0845343		0.0836942	0.16477	0.178227	0.175239	0.301528	0.109309	0.185815
	107	0.200376	0.109441	0.171733	0.105505	0.162494	0.144845	0.176414	0.103824	0.19237	0.132775	0.149978	0.058029	0.063139	0.08745	0.106265	0.08673	0.067853	0.0760308	0.0810675		0.0783205	0.114178	0.109559	0.163761	0.245981	0.115198	0.149735
	108	0.213024	0.217232	0.166006	0.164073	0.088666	0.134381	0.083604	0.062494	0.183768	0.11463	0.142788	0.075398	0.065542	0.073346	0.087938	0.094088	0.093544	0.0674342	0.077986		0.0794095	0.149408	0.164898	0.172408	0.160277	0.119287	0.153256
	109	0.18384	0.106543	0.177459	0.114298	0.083991	0.138398	0.139548	0.077661	0.139975	0.137438	0.129915	0.064279	0.058727	0.08434	0.098918	0.094008	0.105436	0.0857846	0.107453		0.0873682	0.11106	0.219385	0.167051	0.18664	0.124685	0.161764
	110	0.200998	0.134627	0.169006	0.160556	0.114863	0.151759	0.136415	0.08041	0.152194	0.132573	0.14334	0.082528	0.061018	0.10111	0.09173	0.100326	0.114151	0.0889257	0.0820947		0.0902354	0.122957	0.110625	0.169041	0.198606	0.110372	0.14232
	111	0.198872	0.143023	0.16337	0.087996	0.137708	0.128775	0.150608	0.051309	0.180054	0.124362	0.136608	0.078822	0.063167	0.083007	0.118667	0.08889	0.115331	0.0738817	0.0874874		0.0886566	0.096737	0.151463	0.171107	0.185084	0.106692	0.142217
	112	0.189075	0.132079	0.180914	0.17623	0.137091	0.123356	0.154848	0.067897	0.156495	0.118482	0.143647	0.081806	0.059519	0.071013	0.088807	0.096488	0.075024	0.0690874	0.0899911		0.0789669	0.133006	0.171616	0.164373	0.162612	0.128121	0.151946
	113	0.210898	0.113589	0.194276	0.110628	0.0914	0.102802	0.111346	0.082022	0.185625	0.121827	0.132441	0.064468	0.059265	0.096223	0.093705	0.08857	0.101351	0.0844621	0.0761243		0.083021	0.090269	0.15093	0.15282	0.182166	0.113562	0.137949
	114	0.215771	0.14717	0.18964	0.054966	0.099427	0.196418	0.133926	0.020216	0.149457	0.121321	0.132831	0.07188	0.069162	0.088671	0.085173	0.092009	0.09082	0.0727244	0.0797836		0.0812779	0.135085	0.137709	0.173708	0.173508	0.116425	0.147287
	115	0.216963	0.110291	0.171097	0.133489	0.158436	0.113079	0.158166	0.131504	0.147795	0.132471	0.147329	0.068048	0.062036	0.075011	0.094732	0.095768	0.101714	0.066277	0.0813243		0.0806138	0.106324	0.180573	0.165827	0.174967	0.114053	0.148349
	116	0.183943	0.198942	0.214364	0.170648	0.17052	0.203051	0.117152	0	0.165586	0.139973	0.156418	0.073828	0.069247	0.077121	0.09252	0.085451	0.095541	0.0714019	0.07927		0.0805475	0.134508	0.162766	0.158482	0.172048	0.127466	0.151054
	117	0.177308	0.161362	0.205365	0.073775	0.105425	0.081126	0.140839	0.07605	0.15151	0.129532	0.130229	0.066792	0.059547	0.085229	0.088491	0.113123	0.091728	0.0823129	0.0865886		0.0842264	0.149177	0.107746	0.184344	0.177788	0.111272	0.146065
	118	0.197628	0.132079	0.160643	0.144958	0.140001	0.141014	0.161207	0.056617	0.17976	0.116962	0.143087		0.066108	0.085451	0.100735	0.098007	0.096176	0.077684	0.0835713		0.0868189	0.10205	0.170336	0.149147	0.226136	0.117079	0.15295
	119	0.194311	0.104694	0.177914	0.136012	0.106925	0.129709	0.146553	0.074912	0.140659	0.145953	0.135764	0.068677	0.047416	0.089004	0.07917	0.08881	0.103621	0.0636319	0.0752897		0.0769524	0.170661	0.205843	0.168123	0.17555	0.129347	0.169905
	120	0.182544	0.203289	0.146736	0.129972	0.095546	0.259949	0.127383	0.045716	0.143494	0.121219	0.145585	0.0781	0.057087	0.084229	0.096075	0.095288	0.100715	0.0659463	0.0738132		0.0814067	0.171123	0.072666	0.162001	0.179831	0.122804	0.141685
	121	0.208825	0.109891	0.202184	0.140524	0.10913	0.044596	0.145078	0.127143	0.177121	0.130545	0.139504	0.062646	0.059123	0.104441	0.09647	0.08897	0.088642	0.0773534	0.0883219		0.0832459	0.115218	0.176094	0.14754	0.165531	0.086817	0.13824
	122	0.209602	0.177204	0.167279	0.066511	0.131622	0.172126	0.126645	0.053394	0.196476	0.109257	0.141012	0.047412	0.056578	0.091337	0.10745	0.090169	0.093362	0.0647891	0.077665		0.0785953	0.136356	0.180359	0.1594	0.188489	0.11258	0.155437
	123	0.204626	0.11119	0.156371	0.153522	0.084961	0.130177	0.102867	0.074059	0.170376	0.121929	0.131008	0.059003	0.06984	0.083452	0.089518	0.098887	0.095269	0.0811557	0.0811317		0.0822821	0.09177	0.043344	0.160471	0.2632	0.132946	0.138346
	124	0.205352	0.123633	0.173096	0.194351	0.102162	0.170631	0.143788	0.103919	0.17106	0.127504	0.15155	0.08212	0.063337	0.08223	0.084857	0.08705	0.086735	0.0689221	0.0770231		0.0790343	0.145134	0.206376	0.146928	0.188489	0.120841	0.161554
	125	0.194259	0.149969	0.167733	0.155357	0.135591	0.129709	0.158995	0	0.187483	0.128416	0.140751	0.078979	0.072074	0.085229	0.080987	0.08721	0.089912	0.0661117	0.0745193		0.0793778	0.145134	0.201898	0.164603	0.147339	0.116261	0.155047
	126	0.20162	0.112789	0.180732	0.097248	0.115216	0.210899	0.157981	0.103729	0.161676	0.109055	0.145094	0.071912	0.063874	0.073346	0.087464	0.091129	0.084829	0.0809904	0.0770231		0.0788209	0.108057	0.118836	0.156186	0.192088	0.115607	0.138155
	127	0.202708	0.143872	0.189912	0.137847	0.133298	0.085611	0.127106	0.049318	0.155322	0.097296	0.132229	0.088182	0.06755	0.090226	0.102868	0.076493	0.094452	0.0743776	0.0741983		0.0835434	0.145712	0.133017	0.168658	0.198995	0.127712	0.154819
	128	0.183632	0.156465	0.185368	0.192592	0.152968	0.160167	0.13623	0.065243	0.156104	0.123044	0.151181	0.065693	0.053892	0.093114	0.115823	0.090169	0.083195	0.0742123	0.0877442		0.0829803	0.154952	0.191342	0.129023	0.162709	0.110045	0.149614
	129	0.182077	0.159164	0.166097	0.13953	0.105337	0.124384	0.145631	0.057281	0.139095	0.128518	0.134711	0.057275	0.059406	0.074567	0.0941	0.080332	0.08383	0.0732204	0.0732996		0.0745037	0.092579	0.111585	0.168735	0.164169	0.114298	0.130273
	130	0.202501	0.100396	0.154462	0.099694	0.090959	0.099532	0.149963	0.099179	0.120425	0.121219	0.123833	0.071441	0.0572	0.07701	0.089597	0.091689	0.09073	0.0709059	0.0777292		0.0782878	0.157031	0.217039	0.166822	0.148896	0.106692	0.159296
	131	0.220021	0.154766	0.17755	0.114986	0.111952	0.195764	0.105908	0.040313	0.155127	0.126693	0.140308	0.065787	0.053751	0.091337	0.097101	0.077373	0.082105	0.0664423	0.0816453		0.0769427	0.100895	0.148051	0.141342	0.163974	0.118306	0.134514
	132	0.22479	0.193894	0.194276	0.116974	0.16514	0.173808	0.136783	0.079841	0.174482	0.132775	0.159276	0.071189	0.068314	0.086894	0.072613	0.097127	0.095723	0.0814863	0.0747119		0.0810073	0.139936	0.078957	0.159094	0.157845	0.111354	0.129437
	133	0.192807	0.14817	0.201729	0.095183	0.150057	0.098598	0.11835	0.06003	0.164218	0.108953	0.133809	0.060887	0.057936	0.076011	0.092994	0.083371	0.088188	0.0765268	0.0808108		0.0770906	0.102628	0.220771	0.1493	0.159791	0.114216	0.149341
	134	0.188557	0.086404	0.160825	0.16652	0.055589	0.149984	0.145631	0.066286	0.131764	0.145447	0.129701	0.061767	0.077249	0.087339	0.087938	0.093448	0.098446	0.0697487	0.0774725		0.081676	0.118799	0.165538	0.163226	0.146269	0.111517	0.14107
	135	0.1926	0.157215	0.169188	0.071405	0.093958	0.155683	0.150608	0.040881	0.182106	0.141595	0.135524	0.076152	0.057172	0.057131	0.098918	0.080412	0.078383	0.0628053	0.0698329		0.0726008	0.153335	0.139415	0.162614	0.156192	0.116997	0.145711
	136	0.204056	0.203089	0.178459	0.130354	0.145206	0.174555	0.160654	0.081074	0.161774	0.10277	0.154199	0.070593	0.064807	0.093002	0.088649	0.092569	0.095995	0.0583417	0.0981443		0.0827626	0.105746	0.157221	0.162843	0.168838	0.09655	0.13824
	137	0.183321	0.107592	0.166097	0.163844	0.112658	0.109435	0.122037	0	0.145645	0.129126	0.123976	0.063871	0.059689	0.083341	0.09797	0.08673	0.09427	0.0757002	0.0804898		0.0802576	0.130118	0.139415	0.139353	0.16232	0.107346	0.13571
	138	0.193067	0.108242	0.181186	0.079739	0.109306	0.082995	0.113834	0.11463	0.130493	0.131458	0.124495	0.064656	0.059915	0.064239	0.085252	0.094488	0.097992	0.0727244	0.072144		0.0764263	0.122264	0.198486	0.15083	0.148798	0.108327	0.145741
	139	0.198561	0.104294	0.181732	0.138765	0.102426	0.23108	0.154663	0.044389	0.16021	0.121929	0.143805	0.05561	0.060622	0.092669	0.100024	0.090089	0.109521	0.0608214	0.071181		0.0800672	0.116951	0.150504	0.174933	0.173799	0.094832	0.142204
	140	0.183684	0.126732	0.162825	0.172942	0.161259	0.047399	0.134111	0.086951	0.152292	0.123449	0.135164	0.054574	0.051206	0.074456	0.079486	0.08753	0.08501	0.0599949	0.0839565		0.0720267	0.084955	0.104334	0.145474	0.203664	0.12125	0.131935
	141	0.202604	0.20154	0.173369	0.077751	0.115833	0.221176	0.106369	0.071784	0.150728	0.128011	0.144917	0.069902	0.059519	0.078232	0.077116	0.092169	0.094996	0.0687568	0.0603957		0.0751358	0.13393	0.165432	0.137516	0.185668	0.112008	0.146911
	142	0.184099	0.162862	0.153644	0.124085	0.108159	0.105605	0.137244	0.038606	0.175068	0.136729	0.13261	0.063965	0.071961	0.079676	0.104448	0.085371	0.092636	0.0596642	0.0676501		0.0781714	0.102859	0.140374	0.139276	0.233627	0.115361	0.146299
	143	0.187779	0.188497	0.17146	0.195192	0.108689	0.212861	0.150239	0.077282	0.152683	0.135715	0.15804	0.058877	0.071509	0.073346	0.08154	0.072814	0.091183	0.0803291	0.0749687		0.0755709	0.134623	0.140801	0.150907	0.169325	0.121168	0.143365
	144	0.184514	0.09345	0.154826	0.107264	0.094047	0.044783	0.139733	0.074438	0.151314	0.133485	0.117785	0.064625	0.063337	0.083896	0.087385	0.08697	0.095632	0.0530514	0.0722082		0.0758881	0.132544	0.154236	0.109435	0.160667	0.112417	0.13386
	145	0.204471	0.14722	0.169642	0.116898	0.148469	0.238087	0.16646	0.060977	0.161481	0.132877	0.154658	0.077723	0.063393	0.07701	0.087306	0.08825	0.089822	0.0743776	0.0733638		0.0789057	0.088998	0.149971	0.143638	0.171659	0.111354	0.133124
	146	0.205974	0.128081	0.177823	0.136165	0.131975	0.143163	0.08683	0.09899	0.164022	0.118989	0.139201	0.075995	0.062375	0.083452	0.097338	0.08609	0.090094	0.0864459	0.0719514		0.0817177	0.137626	0.127792	0.146698	0.165531	0.119451	0.13942
	147	0.182337	0.189647	0.170551	0.098318	0.116186	0.18259	0.146553	0.068561	0.177121	0.133079	0.146494	0.06786	0.053807	0.085006	0.105159	0.08577	0.092727	0.0611521	0.0790774		0.0788198	0.111753	0.16959	0.163991	0.148117	0.102929	0.139276
	148	0.184825	0.097548	0.189549	0.137236	0.095811	0.129616	0.163788	0.058703	0.134892	0.120003	0.131197	0.058029	0.05754	0.088893	0.075694	0.082571	0.090185	0.0725591	0.0746477		0.0750149	0.133468	0.095591	0.158635	0.145394	0.107264	0.12807
	149	0.200168	0.206687	0.165643	0.14664	0.100927	0.102989	0.126277	0.075102	0.153269	0.112501	0.13902	0.060918	0.056635	0.096556	0.106423	0.094408	0.084738	0.0677649	0.0749687		0.0803014	0.096852	0.173962	0.147463	0.14695	0.11806	0.136657
	150	0.190216	0.155016	0.195548	0.145417	0.112305	0.209404	0.100102	0.059745	0.150923	0.117468	0.143614	0.04936	0.064355	0.081564	0.092362	0.089609	0.085464	0.0808251	0.0667514		0.0762863	0.133353	0.106893	0.150754	0.167865	0.105955	0.132964
	151	0.15393	0.136676	0.178914	0.036769	0.127035	0.045063	0.148212	0.113683	0.142614	0.124666	0.120756	0.053726	0.065288	0.079898	0.100735	0.089769	0.093816	0.0725591	0.0778576		0.0792061	0.125614	0.172895	0.167434	0.164071	0.089843	0.143971
	152	0.164401	0.114488	0.175551	0.168737	0.157907	0.160167	0.144525	0.041071	0.171354	0.129025	0.142723	0.066164	0.056239	0.094335	0.082172	0.082331	0.084829	0.0555312	0.0754181		0.0746274	0.158302	0.100389	0.128794	0.140043	0.096877	0.124881
	153	0.16803	0.097348	0.185186	0.179671	0.11354	0.168015	0.111715	0.073775	0.15063	0.110981	0.135889	0.067326	0.069784	0.089004	0.105712	0.096168	0.074207	0.0823129	0.0892849		0.0842249	0.100087	0.190169	0.125503	0.151036	0.100721	0.133503
	154	0.187624	0.133978	0.178732	0.097171	0.06388	0.145499	0.135677	0.062589	0.15845	0.116455	0.128006	0.073043	0.06328	0.087672	0.104606	0.085371	0.092454	0.0603255	0.0673933		0.0792681	0.129079	0.176734	0.133461	0.153954	0.119533	0.142552
	155	0.171658	0.087253	0.180005	0.09633	0.122801	0.089628	0.133097	0.050929	0.168812	0.111183	0.12117	0.072352	0.047247	0.073568	0.105001	0.081052	0.108977	0.0728897	0.0698971		0.078873	0.101588	0.100496	0.138052	0.14588	0.103911	0.117985
	156	0.189645	0.133028	0.153917	0.154592	0.143265	0.16895	0.15153	0.087614	0.151021	0.123449	0.145701	0.075084	0.057059	0.085229	0.07206	0.08617	0.090548	0.0828089	0.0810034		0.0787453	0.147213	0.184944	0.133461	0.168935	0.112335	0.149378
	157	0.188298	0.096998	0.142554	0.149852	0.058765	0.112051	0.140931	0.071974	0.138411	0.114427	0.121426	0.070404	0.065882	0.074345	0.074746	0.081932	0.078383	0.0631359	0.0808108		0.0737048	0.0905	0.14304	0.126269	0.209501	0.109963	0.135855
	158	0.209188	0.11179	0.157644	0.108411	0.147322	0.133353	0.139733	0.052162	0.173015	0.128822	0.136144		0.05901	0.067571	0.105396	0.069535	0.092908	0.0575151	0.0815169		0.0762074	0.130696	0.098577	0.146392	0.165336	0.088452	0.125891
	159	0.184255	0.158314	0.140736	0.107723	0.150498	0.172687	0.118166	0.085055	0.154833	0.108142	0.138041	0.05404	0.060481	0.073568	0.087938	0.082571	0.074843	0.0687568	0.0639908		0.0707736	0.106209	0.164792	0.133614	0.152981	0.09426	0.130371
	160	0.190216	0.14817	0.161279	0.132648	0.091224	0.170538	0.097245	0.102781	0.16021	0.122942	0.137725	0.056458	0.056918	0.086228	0.085963	0.094888	0.078565	0.0838008	0.0813243		0.0780181	0.130118	0.176414	0.129482	0.155803	0.101948	0.138753
	161	0.174043	0.080507	0.17955	0.141518	0.102338	0.122329	0.148673	0.049223	0.165097	0.119192	0.128247	0.062175	0.057285	0.08223	0.092994	0.091289	0.090639	0.0644585	0.0811959		0.0777833	0.073636	0.109133	0.147999	0.171173	0.111354	0.122659
	162	0.192134	0.158264	0.161916	0.07928	0.14988	0.127561	0.135217	0.046569	0.136652	0.108041	0.129551	0.063211	0.054769	0.083341	0.087069	0.08809	0.072573	0.062144	0.0633489		0.0718182	0.155876	0.129925	0.144403	0.139557	0.105465	0.135045
	163	0.196799	0.150518	0.164097	0.095642	0.131887	0.189784	0.080378	0.098421	0.126876	0.111589	0.134599	0.071095	0.060877	0.06957	0.082567	0.092808	0.080653	0.0573497	0.0678427		0.0728453	0.160612	0.178227	0.143485	0.149188	0.10571	0.147444
	164	0.187883	0.14732	0.174642	0.184411	0.032039	0.17932	0.143419	0.052351	0.147893	0.113109	0.136239	0.068017	0.056352	0.070569	0.095996	0.091769	0.091547	0.0581763	0.0758033		0.0760287	0.110482	0.094845	0.153432	0.16125	0.094914	0.122985
	165	0.183892	0.199092	0.170824	0.197715	0.149351	0.16624	0.17835	0.051783	0.160699	0.122638	0.158058	0.063526	0.057003	0.081342	0.093863	0.080252	0.076568	0.0785106	0.0672649		0.0747912	0.137857	0.175028	0.142184	0.152203	0.103093	0.142073
	166	0.200842	0.135777	0.150372	0	0.146264	0.16652	0.171806	0.084865	0.150044	0.117266	0.132376	0.048512	0.059972	0.079343	0.104843	0.08681	0.084284	0.0930587	0.0650822		0.0777381	0.110598	0.180146	0.128028	0.152495	0.113971	0.137048
	167	0.204056	0.07441	0.175732	0.178065	0.106572	0.121768	0.152728	0.037848	0.175948	0.11757	0.13447	0.059819	0.061216	0.074678	0.075773	0.084171	0.092182	0.0556966	0.0745193		0.0722569	0.147098	0.128965	0.128181	0.182068	0.108736	0.13901
	168	0.201516	0.172256	0.171642	0.197868	0.146617	0.201183	0.104802	0.077377	0.160014	0.121523	0.15548	0.065159	0.067069	0.081897	0.09015	0.084491	0.089005	0.0671036	0.072465		0.0771674	0.10644	0.105827	0.155421	0.182166	0.128611	0.135693
	169	0.198509	0.154966	0.170006	0.08402	0.077376	0.070849	0.095678	0.042303	0.163827	0.110474	0.116801	0.061044	0.061697	0.081786	0.080276	0.082171	0.081833	0.0684261	0.0796552		0.074611	0.124459	0.164045	0.146163	0.153662	0.104565	0.138579
	170	0.184773	0.119286	0.153462	0.109175	0.131887	0.203892	0.172083	0.086856	0.143005	0.117063	0.142148	0.068457	0.056974	0.081675	0.070086	0.099527	0.080653	0.0823129	0.0791416		0.0773533	0.084493	0.166391	0.147769	0.191213	0.115116	0.140996
	171	0.171866	0.180502	0.194821	0.186858	0.108777	0.050201	0.158811	0.051877	0.149457	0.125578	0.137875	0.064876	0.05853	0.099888	0.08383	0.085451	0.098264	0.0707406	0.0813243		0.080363	0.140514	0.128006	0.141648	0.144615	0.111272	0.133211
	172	0.192393	0.094799	0.172278	0.076221	0.0757	0.149703	0.138903	0.039175	0.145058	0.121016	0.120525	0.061264	0.057823	0.076455	0.085015	0.08809	0.08265	0.0588376	0.072144		0.0727848	0.082068	0.122141	0.131854	0.162126	0.099249	0.119488
	173	0.207322	0.182451	0.170733	0.157803	0.130652	0.160261	0.097982	0.118138	0.144667	0.098816	0.146882	0.060133	0.048293	0.084784	0.096943	0.091209	0.083285	0.0540434	0.079912		0.0748253	0.111175	0.152743	0.153967	0.154635	0.102193	0.134943
	174	0.183373	0.136376	0.161098	0.121638	0.141413	0.082902	0.124618	0	0.151217	0.118685	0.122132		0.054005	0.090559	0.080434	0.084331	0.088097	0.0732204	0.0746477		0.0778992	0.084378	0.138455	0.149988	0.157165	0.096468	0.125291
	175	0.185188	0.133378	0.172278	0.092048	0.101456	0.176424	0.115862	0.083064	0.132546	0.113616	0.130586	0.05137	0.058784	0.089338	0.101683	0.084011	0.072482	0.0732204	0.0856898		0.0770723	0.138666	0.184518	0.12405	0.136152	0.115279	0.139733
	176	0.209084	0.125082	0.165188	0.194427	0.079316	0.107847	0.172543	0	0.147893	0.12203	0.132341	0.060918	0.053044	0.057798	0.089755	0.079692	0.092273	0.0680955	0.0764453		0.0722526	0.099047	0.140481	0.13063	0.280127	0.105465	0.15115
	177	0.191978	0.122984	0.167006	0.151992	0.082404	0.198286	0.119364	0.118233	0.158157	0.104392	0.14148	0.078351	0.062771	0.071124	0.073482	0.095288	0.078292	0.0578457	0.0758675		0.0741277	0.119376	0.113184	0.125503	0.157456	0.11577	0.126258
	178	0.188609	0.128531	0.15728	0.041662	0.145911	0.099906	0.152083	0.024482	0.163436	0.116252	0.121815	0.071472	0.049339	0.061351	0.082646	0.079212	0.080925	0.0634666	0.0746477		0.0703824	0.092463	0.165005	0.138282	0.124381	0.115116	0.127049
	179	0.168652	0.126981	0.175369	0.167361	0.121743	0.138585	0.127475	0.101833	0.1476	0.100337	0.137594	0.068677	0.059547	0.076677	0.084778	0.082571	0.083285	0.0647891	0.071823		0.0740184	0.099509	0.1601	0.138664	0.144032	0.116425	0.131746
	180	0.177671	0.183001	0.151917	0.159944	0.113275	0.139706	0.1307	0.040597	0.138704	0.105507	0.134102	0.06629	0.052422	0.077899	0.105159	0.082011	0.085827	0.0743776	0.0917244		0.0794638	0.104014	0.076931	0.13591	0.146075	0.104238	0.113434
	181	0.200272	0.127631	0.155644	0.104358	0.116186	0.149236	0.124618	0.058797	0.125019	0.121219	0.128298		0.059972	0.076899	0.071981	0.085371	0.088732	0.0687568	0.0858182		0.07679	0.123188	0.156582	0.134609	0.111443	0.087226	0.12261
	182	0.208099	0.085804	0.159462	0.114527	0.11698	0.102054	0.103973	0.049602	0.118861	0.123348	0.118271	0.057181	0.059491	0.068126	0.081935	0.08857	0.08265	0.0757002	0.07086		0.0730642	0.088074	0.148585	0.134303	0.194228	0.112744	0.135587
	183	0.181922	0.140724	0.148645	0.133183	0.110012	0.159326	0.152544	0.081832	0.14369	0.121827	0.13737	0.082214	0.04637	0.103553	0.115823	0.094408	0.077021	0.0518942	0.0630921		0.0792969	0.139128	0.154129	0.129788	0.12944	0.109963	0.13249
	184	0.192859	0.133328	0.179277	0.102906	0.151027	0.139706	0.188304	0.104488	0.159232	0.099627	0.145075	0.069996	0.059632	0.078454	0.076879	0.089769	0.083104	0.0611521	0.0647612		0.0729684	0.079064	0.112545	0.119994	0.139557	0.092542	0.10874
	185	0.178345	0.097098	0.155916	0.126073	0.0929	0.110183	0.113466	0	0.162556	0.105101	0.114164	0.066886	0.05392	0.061463	0.105317	0.089369	0.076568	0.0573497	0.0784996		0.0736715	0.155068	0.082476	0.140347	0.149479	0.106037	0.126681
	186	0.174872	0.146021	0.158916	0.177224	0.075965	0.171472	0.115309	0.068561	0.157668	0.124564	0.137057	0.056804	0.058558	0.078787	0.104369	0.097447	0.098264	0.0770227	0.0727218		0.0804967	0.093618	0.113931	0.134532	0.132261	0.096959	0.11426
	187	0.185032	0.125382	0.153735	0.151687	0.130563	0.140921	0.120194	0.045242	0.137629	0.114326	0.130471	0.053474	0.052902	0.079454	0.107924	0.089689	0.078111	0.0636319	0.0806824		0.0757335	0.157956	0.114677	0.142643	0.152592	0.1098	0.135534
	188	0.166423	0.065515	0.176005	0.102982	0.103926	0.19212	0.144064	0.061072	0.166466	0.113109	0.129168		0.057483	0.068237	0.077353	0.08889	0.088006	0.0628053	0.073749		0.073789	0.099625	0.144319	0.133614	0.169033	0.093114	0.127941
	189	0.187883	0.11159	0.165461	0.091513	0.064939	0.044129	0.159179	0.059271	0.162849	0.118888	0.11657	0.074236	0.0559	0.07701	0.064556	0.097927	0.08029	0.0495797	0.0662378		0.0707171	0.127231	0.134083	0.146545	0.139362	0.106283	0.130701
	190	0.159529	0.108991	0.139191	0.145876	0.100309	0.180255	0.134848	0.084107	0.17282	0.112501	0.133843	0.073451	0.051206	0.091448	0.094021	0.084491	0.08029	0.0532168	0.0750329		0.0753946	0.092579	0.130458	0.14402	0.14267	0.111435	0.124232
	191	0.191097	0.09405	0.162643	0.158721	0.154202	0.152506	0.121668	0.075576	0.154247	0.123247	0.138796	0.063368	0.050216	0.074567	0.074667	0.084331	0.073027	0.0745429	0.0734922		0.0710264	0.140399	0.166924	0.13744	0.157748	0.08101	0.136704
	192	0.174509	0.150868	0.139827	0.100688	0.08699	0.101027	0.134756	0.046664	0.164413	0.108953	0.12087	0.073262	0.053835	0.065905	0.086121	0.069695	0.089186	0.0656157	0.079912		0.0729415	0.103783	0.164365	0.131854	0.170686	0.109963	0.13613
	193	0.179693	0.167459	0.153917	0.095871	0.090342	0.113359	0.141668	0.072448	0.159428	0.115644	0.128983	0.069431	0.056069	0.056021	0.098997	0.082731	0.084919	0.0728897	0.0723366		0.0741743	0.118106	0.107853	0.120989	0.14802	0.112908	0.121575
	194	0.187676	0.157814	0.165915	0.141441	0.136473	0.180535	0.144064	0.053773	0.150337	0.106013	0.142404	0.061892	0.058671	0.074678	0.076484	0.075053	0.066945	0.062144	0.0595612		0.0669285	0.100433	0.11745	0.134456	0.151717	0.108982	0.122608
	195	0.186587	0.150968	0.173278	0.094342	0.098986	0.109809	0.126737	0.050455	0.141637	0.121929	0.125473	0.050051	0.056154	0.063795	0.097259	0.090249	0.069033	0.0856193	0.0703465		0.0728133	0.13393	0.175988	0.139047	0.138584	0.104401	0.13839
	196	0.190527	0.079358	0.166461	0.149163	0.088666	0.218841	0.14176	0.045526	0.15845	0.109156	0.134791	0.067357	0.062234	0.067793	0.071428	0.08609	0.075297	0.0505717	0.0807466		0.0701897	0.115103	0.109666	0.136904	0.132261	0.106119	0.120011
	197	0.187468	0.12953	0.17446	0.090443	0.128623	0.107473	0.077153	0.060598	0.144081	0.125071	0.12249	0.068771	0.055956	0.087672	0.094258	0.089769	0.074207	0.0707406	0.0625143		0.075486	0.148137	0.151144	0.151442	0.150258	0.113971	0.14299
	198	0.19063	0.148969	0.170642	0.149546	0.118656	0.134288	0.173649	0.071784	0.152781	0.124362	0.143531	0.067766	0.052337	0.06746	0.088491	0.068735	0.080199	0.0566885	0.0714378		0.0691393	0.087612	0.159994	0.142949	0.144518	0.111108	0.129236
	199	0.160825	0.088653	0.173096	0.130813	0.065821	0.134101	0.133742	0.046664	0.153269	0.11757	0.120455	0.06161	0.054542	0.057798	0.052865	0.076893	0.081379	0.0803291	0.0654674		0.0663604	0.118337	0.105187	0.136675	0.127299	0.117242	0.120948
	200	0.188142	0.085554	0.183095	0.108411	0.116715	0.157645	0.091438	0.054152	0.14105	0.109663	0.123587	0.068865	0.062743	0.086006	0.104843	0.079212	0.106889	0.0656157	0.0749687		0.0811428	0.110713	0.128006	0.139353	0.146561	0.109554	0.126837
	201	0.185654	0.091201	0.151644	0.110093	0.180752	0.107754	0.175308	0.055195	0.138411	0.092227	0.128824	0.066478	0.057003	0.076455	0.082962	0.085051	0.088369	0.089587	0.0716946		0.0772	0.133353	0.16959	0.123591	0.136638	0.10481	0.133596
	202	0.166371	0.194494	0.173823	0.137083	0.132945	0.14606	0.098535	0.073585	0.145547	0.124666	0.139311	0.062049	0.051404	0.068015	0.102947	0.084571	0.069759	0.0565231	0.0751613		0.0713037	0.089345	0.133017	0.138435	0.125743	0.110617	0.119431
	203	0.167097	0.206538	0.174187	0.117892	0.155614	0.112051	0.17153	0.042588	0.143592	0.110372	0.140146	0.057997	0.059434	0.066793	0.079249	0.080972	0.072936	0.0742123	0.0706032		0.0702746	0.128617	0.114677	0.153432	0.12691	0.109063	0.12654
	204	0.180989	0.133278	0.171642	0.122097	0.153938	0.166334	0.112268	0.054437	0.14457	0.095167	0.133472	0.060542	0.049452	0.071235	0.078301	0.077773	0.082196	0.0586723	0.0758033		0.0692468	0.092694	0.160847	0.142413	0.147145	0.110372	0.130694
	205	0.175494	0.136226	0.143645	0.14794	0.064586	0.105979	0.125631	0.071974	0.116221	0.123044	0.121074	0.071189	0.058586	0.074456	0.111873	0.079452	0.074933	0.0639625	0.0749045		0.0761695	0.134508	0.131418	0.131013	0.151133	0.10481	0.130576
	206	0.178967	0.11064	0.150008	0.14297	0.077993	0.151572	0.107475	0.05055	0.136652	0.114934	0.122176	0.066478	0.056607	0.090115	0.082093	0.090249	0.069487	0.0528861	0.0780502		0.0732457	0.094889	0.146452	0.136292	0.13265	0.090661	0.120189
	207	0.169689	0.114538	0.17146	0.083791	0.122978	0.123076	0.147751	0.084297	0.147209	0.103783	0.126857	0.059285	0.052082	0.069792	0.081856	0.084331	0.08147	0.0537127	0.0556451		0.0672717	0.130465	0.153489	0.131931	0.142086	0.115034	0.134601
	208	0.172073	0.138325	0.159098	0.148399	0.090254	0.194829	0.086001	0.047801	0.156788	0.084118	0.127769	0.055233	0.050272	0.085673	0.073877	0.092569	0.094633	0.069914	0.0654674		0.0734548	0.10078	0.153809	0.144326	0.148798	0.099658	0.129474
	209	0.178708	0.125532	0.153644	0.124008	0.076053	0.104671	0.101945	0.051877	0.155127	0.105203	0.117677	0.053914	0.062517	0.082008	0.087622	0.085131	0.091547	0.0826436	0.0666872		0.0765087	0.120185	0.086421	0.108976	0.133623	0.10432	0.110705
	210	0.176324	0.170308	0.151917	0.085244	0.076935	0.15671	0.114756	0.066476	0.133426	0.097296	0.122939	0.069462	0.045352	0.073346	0.082093	0.076413	0.080834	0.0733857	0.0788848		0.0724713	0.096044	0.17876	0.143026	0.156484	0.095895	0.134042
	211	0.186172	0.123383	0.160007	0.170037	0.108336	0.191933	0.066462	0.066476	0.137238	0.121523	0.133157	0.066478	0.056154	0.073679	0.084225	0.080092	0.076023	0.0547046	0.0716304		0.0703733	0.125267	0.180146	0.160089	0.133039	0.106773	0.141063
	212	0.172799	0.118836	0.155916	0.087079	0.127741	0.081033	0.118074	0.025904	0.12238	0.092227	0.110199	0.055893	0.065005	0.083229	0.112584	0.08633	0.085555	0.0540434	0.0661094		0.0760936	0.138204	0.141334	0.152284	0.157845	0.1089	0.139713
	213	0.188661	0.1834	0.162007	0.086238	0.112481	0.146246	0.077429	0.074817	0.15933	0.110677	0.130129	0.075807	0.046992	0.087339	0.060448	0.095848	0.072755	0.07818	0.0639266		0.072662	0.095697	0.118622	0.127722	0.130315	0.097122	0.113896
	214	0.193067	0.189447	0.167551	0.166137	0.116715	0.043288	0.130885	0.062684	0.160503	0.119394	0.134967	0.05806	0.058614	0.06224	0.085884	0.085131	0.089095	0.0515636	0.0712452		0.0702291	0.12134	0.116063	0.136216	0.129634	0.095159	0.119682
	215	0.174509	0.128131	0.147008	0.029352	0.104455	0.191092	0.090517	0.038891	0.153758	0.095674	0.115339	0.048292	0.061046	0.077233	0.090782	0.094728	0.0792	0.0679302	0.065339		0.0730688	0.111522	0.171509	0.143179	0.148896	0.116343	0.13829
	216	0.175494	0.087703	0.167188	0.196186	0.102867	0.102989	0.116323	0.095103	0.132839	0.128214	0.130491	0.066886	0.056465	0.070347	0.065741	0.082811	0.090457	0.0684261	0.0667514		0.0709856	0.135778	0.143573	0.13744	0.141891	0.096713	0.131079
	217	0.174509	0.167659	0.153371	0.151075	0.081522	0.133914	0.063697	0.025525	0.153954	0.108649	0.121388	0.059222	0.053977	0.056576	0.074272	0.082971	0.08029	0.0745429	0.071823		0.0692092	0.108519	0.166391	0.128181	0.133817	0.106528	0.128687
	218	0.156056	0.176854	0.172006	0.05359	0.112129	0.107941	0.103235	0.079936	0.132644	0.113312	0.12077	0.064374	0.052874	0.069236	0.087148	0.080092	0.080199	0.085454	0.0695119		0.0736111	0.129425	0.17055	0.131854	0.138876	0.118633	0.137868
	219	0.185084	0.080857	0.18355	0.107723	0.157466	0.180068	0.137244	0.061357	0.117981	0.105304	0.131663	0.080487	0.047247	0.072568	0.0862	0.08625	0.07103	0.0608214	0.0759317		0.0725669	0.1054	0.086421	0.142872	0.140432	0.096877	0.1144
	220	0.158492	0.160063	0.161279	0.167896	0.113452	0.111397	0.066185	0.075197	0.132546	0.09172	0.123823	0.06117	0.057483	0.065461	0.06187	0.08673	0.09082	0.0685914	0.0695119		0.0702047	0.135663	0.155622	0.134532	0.157748	0.096877	0.136088
	221	0.172384	0.177104	0.152644	0.069493	0.080287	0.145966	0.111438	0.030833	0.145351	0.109359	0.119486	0.049297	0.044278	0.080231	0.110609	0.08753	0.080925	0.0715672	0.0704107		0.074356	0.087381	0.134936	0.121372	0.136249	0.102847	0.116557
	222	0.171347	0.138475	0.165552	0.103441	0.084344	0.155402	0.108489	0.054532	0.134403	0.104594	0.122058		0.054769	0.074456	0.101209	0.08769	0.081924	0.0783453	0.0665588		0.0778503	0.12596	0.159674	0.139123	0.151911	0.09246	0.133826
	223	0.181248	0.134477	0.157007	0.173477	0.137973	0.185206	0.100655	0.050076	0.132937	0.087361	0.134042	0.074582	0.049509	0.081786	0.102473	0.084411	0.06867	0.046108	0.0759317		0.0729338	0.091308	0.14368	0.142949	0.216311	0.081664	0.135182
	224	0.17508	0.109891	0.162098	0.07064	0.126065	0.066084	0.117705	0.070172	0.151901	0.105203	0.115484	0.065567	0.057257	0.078454	0.045914	0.082331	0.081833	0.0742123	0.0695761		0.069393	0.126191	0.100176	0.130553	0.130121	0.096877	0.116784
	225	0.154967	0.177753	0.163461	0.107417	0.104102	0.199127	0.121392	0.026568	0.125606	0.104493	0.128489	0.078445	0.051602	0.07279	0.100498	0.082971	0.071211	0.0636319	0.0700897		0.0739048	0.089922	0.156475	0.131778	0.136638	0.095977	0.122158
	226	0.178449	0.137775	0.159371	0.182423	0.100221	0.105511	0.095954	0.064864	0.14193	0.115441	0.128194	0.054574	0.054995	0.066904	0.09568	0.08609	0.072755	0.069418	0.0771515		0.0721959	0.116258	0.126833	0.151825	0.128467	0.09475	0.123627
	227	0.175909	0.11054	0.142463	0.038374	0.13956	0.112986	0.071715	0.056996	0.128636	0.108852	0.108603	0.047318	0.062686	0.072679	0.100893	0.08809	0.080199	0.0685914	0.0670724		0.0734411	0.104129	0.076185	0.123744	0.182846	0.107509	0.118883
	228	0.182596	0.135127	0.161279	0.159944	0.087608	0.099532	0.107475	0.070267	0.148577	0.117671	0.127008	0.067326	0.058643	0.072679	0.069217	0.080412	0.085555	0.0659463	0.0650822		0.0706076	0.129194	0.148585	0.135144	0.126132	0.108491	0.129509
	229	0.172125	0.14767	0.169642	0.179288	0.15385	0.19511	0.141299	0.063916	0.145254	0.106622	0.147478	0.082811	0.064185	0.076677	0.084304	0.081212	0.087098	0.0697487	0.0696403		0.0769595	0.087612	0.142507	0.127952	0.12477	0.094668	0.115502
	230	0.159114	0.130679	0.152371	0.035851	0.101015	0.11719	0.1307	0.045621	0.142321	0.10723	0.112209	0.062269	0.059152	0.078343	0.088807	0.083051	0.071484	0.0563578	0.0685489		0.0710016	0.123304	0.148691	0.117393	0.118058	0.095814	0.120652
	231	0.178242	0.100746	0.18964	0.142359	0.103661	0.158205	0.073282	0.060504	0.150435	0.099931	0.125701	0.055642	0.047105	0.075011	0.090624	0.08617	0.085646	0.0659463	0.0788848		0.0731286	0.095235	0.118729	0.126957	0.145199	0.104647	0.118153
	232	0.170311	0.081656	0.143009	0.171184	0.112129	0.109062	0.105908	0.061641	0.157864	0.114427	0.122719	0.056207	0.052676	0.064572	0.053813	0.084971	0.076658	0.0504063	0.0729786		0.0640352	0.11568	0.107213	0.111425	0.137222	0.117815	0.117871
	233	0.173732	0.169158	0.155189	0.048237	0.134797	0.121675	0.119641	0.053773	0.144276	0.110474	0.123095	0.055045	0.061781	0.073457	0.082962	0.082571	0.080653	0.0509023	0.0732996		0.0700839	0.097083	0.138882	0.139506	0.151036	0.114053	0.128112
	234	0.191926	0.164911	0.153917	0.116898	0.044299	0.106165	0.09365	0.071594	0.149653	0.104696	0.119771	0.068394	0.052195	0.085784	0.076484	0.080812	0.066491	0.0714019	0.0722724		0.0717293	0.137395	0.142933	0.146545	0.130023	0.100067	0.131393
	235	0.164401	0.085304	0.170551	0.160326	0.104367	0.155402	0.076876	0.053773	0.130298	0.104392	0.120569	0.070938	0.04671	0.08434	0.083436	0.082251	0.077203	0.0633012	0.0688057		0.0721231	0.083916	0.170443	0.138588	0.14014	0.089107	0.124439
	236	0.187624	0.157415	0.154917	0.034169	0.115128	0.220055	0.110885	0.05548	0.123455	0.092126	0.125125	0.05382	0.047784	0.084562	0.081856	0.074653	0.064221	0.0560272	0.0672649		0.0662735	0.125267	0.153383	0.151748	0.140043	0.095241	0.133136
	237	0.207425	0.145171	0.167188	0.143123	0.123242	0.086545	0.079457	0.037279	0.130591	0.126085	0.124611	0.057558	0.04244	0.079676	0.059342	0.079932	0.076295	0.0623093	0.066623		0.0655219	0.079411	0.155195	0.135833	0.145588	0.110045	0.125214
	238	0.204367	0.085604	0.146281	0.138077	0.113628	0.13625	0.100931	0.064106	0.118958	0.106622	0.121482	0.065379	0.059632	0.066793	0.096548	0.072734	0.060499	0.0555312	0.066623		0.0679674	0.128155	0.112225	0.133232	0.119614	0.110699	0.120785
	239	0.180885	0.14802	0.176278	0.072093	0.096781	0.172687	0.11789	0.027895	0.125508	0.104898	0.122293	0.062772	0.047416	0.07168	0.114401	0.082571	0.070939	0.0718978	0.0645044		0.0732727	0.095351	0.151463	0.131931	0.112999	0.10113	0.118575
	240	0.157507	0.191396	0.171369	0.140753	0.083815	0.106726	0.102959	0.095103	0.146036	0.105	0.130066	0.054197	0.049	0.064683	0.067163	0.083291	0.082741	0.0618134	0.0754823		0.0672963	0.135894	0.121288	0.15435	0.125159	0.106283	0.128595
	241	0.18047	0.116137	0.157644	0.150998	0.113716	0.1597	0.13706	0.05311	0.140757	0.106216	0.131581	0.068017	0.060735	0.078676	0.091256	0.075133	0.08147	0.0599949	0.0673291		0.0728264	0.090615	0.109666	0.12206	0.196174	0.086081	0.120919
	242	0.168341	0.156165	0.16237	0.096712	0.109306	0.111491	0.073558	0.063063	0.141246	0.088882	0.117113	0.060761	0.048491	0.078787	0.070086	0.085131	0.083921	0.0940506	0.080233		0.0751826	0.121802	0.13387	0.139123	0.12798	0.101948	0.124945
	243	0.18695	0.158214	0.147917	0.116668	0.103044	0.102802	0.120378	0.047801	0.134794	0.108142	0.122671	0.070655	0.055193	0.070236	0.059105	0.074813	0.070667	0.0649544	0.0639908		0.0662018	0.097661	0.148904	0.117469	0.133817	0.081418	0.115854
	244	0.18244	0.082756	0.176641	0.132801	0.116892	0.18203	0.083143	0.059461	0.134501	0.108142	0.125881	0.047727	0.0669	0.085562	0.104132	0.080092	0.062859	0.0542087	0.0630279		0.0705636	0.102974	0.13515	0.125733	0.132747	0.097613	0.118843
	245	0.18384	0.100046	0.173005	0.071557	0.112305	0.076362	0.171898	0.050076	0.143494	0.098816	0.11814	0.071221	0.047756	0.081675	0.094495	0.084891	0.082287	0.0675995	0.0769589		0.0758604	0.101704	0.148265	0.116169	0.138584	0.095405	0.120025
	246	0.172799	0.096248	0.1401	0.13326	0.142736	0.162783	0.077982	0.075197	0.113191	0.10429	0.121859	0.073325	0.064298	0.080786	0.10113	0.08897	0.079836	0.0679302	0.0706674		0.0783678	0.117413	0.147305	0.138282	0.143156	0.107182	0.130668
	247	0.157403	0.11234	0.157371	0.137465	0.134885	0.123263	0.128489	0.063727	0.142712	0.098816	0.125647	0.067577	0.054231	0.073012	0.080592	0.082651	0.077657	0.0654504	0.0713094		0.07156	0.083223	0.132164	0.159935	0.139849	0.102847	0.123604
	248	0.182959	0.116687	0.150463	0.119421	0.066527	0.138492	0.078443	0.029601	0.12365	0.109764	0.111601	0.047978	0.049481	0.067571		0.075293	0.094815	0.0414791	0.0781144		0.0649616	0.13497	0.147305	0.139965	0.145783	0.100148	0.133634
	249	0.176375	0.077059	0.176459	0.108028	0.117597	0.127	0.137889	0.067803	0.130004	0.123551	0.124176	0.056081	0.045522	0.080675	0.110767	0.065376	0.087007	0.0523902	0.0769589		0.0718471	0.081375	0.131631	0.143026	0.11154	0.100476	0.11361
	250	0.181196	0.079558	0.150826	0.065135	0.125271	0.186514	0.09789	0.062305	0.145351	0.097701	0.119175	0.047632	0.054231	0.068792	0.116534	0.075693	0.077929	0.0623093	0.0895417		0.0740828	0.137857	0.100922	0.128105	0.107746	0.08469	0.111864
	251	0.198613	0.11069	0.163279	0.135248	0.074906	0.131671	0.099457	0.056238	0.131862	0.091923	0.119389	0.065913	0.053949	0.081786	0.079012	0.080572	0.082832	0.0695834	0.0695761		0.0729029	0.089691	0.115637	0.123514	0.13907	0.110945	0.115771
	252	0.176686	0.120335	0.151372	0.163538	0.122449	0.073746	0.081484	0.049318	0.163729	0.105608	0.120826		0.05081	0.062906	0.041727	0.078972	0.074116	0.0601602	0.0703465		0.0627197	0.131273	0.149331	0.143408	0.137027	0.120514	0.136311
	253	0.181507	0.082506	0.145736	0.037763	0.115392	0.151478	0.111162	0.073301	0.129516	0.109663	0.113802	0.052469	0.043005	0.071124	0.091098	0.077933	0.079654	0.0755349	0.0687415		0.0699449	0.106786	0.147838	0.131625	0.187516	0.125749	0.139903
	254	0.184306	0.100696	0.176459	0.157956	0.131798	0.134942	0.11153	0.072637	0.144374	0.12203	0.133673	0.053851	0.059463	0.07168	0.088254	0.076813	0.070213	0.0603255	0.0753539		0.0694942	0.117297	0.133444	0.13063	0.136638	0.095568	0.122715
	255	0.168756	0.11154	0.144736	0.069875	0.129858	0.135222	0.104802	0.052067	0.135772	0.109663	0.116229	0.059191	0.052308	0.083452	0.102947	0.074414	0.058048	0.0547046	0.0631563		0.0685276	0.090269	0.104761	0.122213	0.144907	0.107509	0.113932
	256	0.163261	0.097598	0.156371	0.158033	0.074994	0.15942	0.120194	0.059082	0.15151	0.117063	0.125753	0.070153	0.054316	0.079787	0.059658	0.090249	0.060862	0.0720632	0.0616797		0.068596	0.12827	0.140161	0.138588	0.153371	0.091642	0.130406
	257	0.189127	0.094899	0.152917	0.1432	0.09634	0.11719	0.122221	0.068182	0.125801	0.12274	0.123262	0.061264	0.064468	0.079454	0.088333	0.071454	0.084466	0.053878	0.0698329		0.0716437	0.094311	0.132591	0.14226	0.135082	0.095159	0.119881
	258	0.155952	0.110341	0.151917	0.07194	0.095546	0.172874	0.037614	0.031876	0.133719	0.111285	0.107306	0.068363	0.053185	0.066904	0.092046	0.079212	0.080653	0.0594989	0.071823		0.0714606	0.165579	0.121608	0.135297	0.132455	0.116097	0.134207
	259	0.164712	0.172956	0.167461	0.126608	0.118215	0.136903	0.116415	0.086003	0.146622	0.094052	0.132995	0.05448	0.052506	0.075122	0.101999	0.083211	0.056323	0.0799985	0.0699613		0.0717001	0.082414	0.092286	0.118541	0.151133	0.119369	0.112749
	260	0.170103	0.195843	0.168915	0.081956	0.078964	0.107473	0.138166	0.030928	0.144863	0.093646	0.121086	0.059694	0.051404	0.07701	0.052312	0.090649	0.088188	0.0823129	0.0648896		0.0708074	0.143286	0.144853	0.136522	0.139168	0.084608	0.129687
	261	0.197525	0.172306	0.162734	0.121179	0.092988	0.109622	0.101761	0.115768	0.138313	0.115644	0.132784	0.082874	0.056324	0.062351	0.080434	0.096488	0.085918	0.0659463	0.0729144		0.0754062	0.089691	0.138668	0.123361	0.127591	0.09156	0.114174
	262	0.175857	0.175455	0.155916	0.15398	0.138326	0.158299	0.109134	0	0.146818	0.105101	0.131889	0.064939	0.046823	0.068015	0.114322	0.078572	0.07221	0.0690874	0.071181		0.0731437	0.140861	0.139201	0.117928	0.138779	0.101048	0.127563
	263	0.181248	0.078658	0.173096	0.089831	0.076317	0.088974	0.085263	0.095956	0.144081	0.105709	0.111913	0.06987	0.056409	0.068903	0.093073	0.095128	0.074661	0.0733857	0.0803614		0.0764739	0.081721	0.14176	0.122519	0.11835	0.102929	0.113456
	264	0.158025	0.200341	0.151826	0.128519	0.101015	0.14933	0.075033	0.038417	0.157473	0.091822	0.12518	0.056301	0.053383	0.062018	0.048204	0.08777	0.071847	0.0788412	0.0691267		0.0659364	0.163269	0.131204	0.119382	0.130704	0.089925	0.126897
	265	0.179641	0.186798	0.141554	0.072475	0.153673	0.128962	0.094295	0.089415	0.129809	0.115137	0.129176	0.048041	0.053411	0.076233	0.101051	0.08681	0.074752	0.074047	0.0670724		0.0726772	0.107941	0.101136	0.117622	0.167768	0.103011	0.119496
	266	0.184047	0.172206	0.178005	0.166749	0.126241	0.1142	0.185907	0.031212	0.149164	0.108041	0.141577	0.081272	0.051969	0.071902	0.087069	0.074494	0.067489	0.0659463	0.064376		0.0705647	0.120531	0.129925	0.122672	0.135082	0.087389	0.11912
	267	0.185499	0.087853	0.127829	0.140906	0.098192	0.115041	0.196138	0.094724	0.136945	0.090909	0.127404	0.061861	0.050216	0.071458	0.054129	0.082251	0.058593	0.0714019	0.0589192		0.0636036	0.083569	0.115424	0.12535	0.140821	0.083136	0.10966
	268	0.181559	0.087553	0.120921	0.124696	0.047298	0.13709	0.181115	0.076713	0.120131	0.100235	0.117731	0.052124	0.045663	0.071235	0.101762	0.08913	0.073027	0.0826436	0.0716304		0.0734019	0.13058	0.128006	0.147616	0.118836	0.090988	0.123205
	269	0.178449	0.109341	0.139737	0.087232	0.134885	0.096168	0.138166	0.034625	0.165097	0.088071	0.117177	0.046659	0.048802	0.0749	0.088175	0.064736	0.082922	0.0738817	0.0768305		0.0696133	0.115218	0.139521	0.113567	0.159207	0.10023	0.125549
	270	0.166786	0.126781	0.158734	0.114451	0.126506	0.152132	0.070056	0.069035	0.130689	0.098208	0.121338	0.061264	0.055702	0.069459	0.069928	0.081132	0.078383	0.0624746	0.0597538		0.0672621	0.116142	0.140161	0.132925	0.131677	0.098676	0.123916
	271	0.184099	0.079957	0.165733	0.132037	0.137443	0.116629	0.134848	0.094629	0.148382	0.116556	0.131031	0.051464	0.059745	0.074678	0.071507	0.075933	0.070394	0.0718978	0.0706674		0.0682858	0.083454	0.098043	0.114791	0.201427	0.109063	0.121356
	272	0.163572	0.124133	0.136737	0.105429	0.114687	0.146807	0.133926	0.046095	0.139584	0.095268	0.120624	0.07744	0.046285	0.069903	0.110609	0.083211	0.077475	0.0588376	0.0722082		0.0744961	0.108634	0.154769	0.127646	0.135374	0.098349	0.124954
	273	0.167304	0.123933	0.180459	0.065288	0.101897	0.15288	0.054296	0.07368	0.118274	0.089287	0.11273	0.080173	0.055108	0.06224	0.0941	0.081372	0.065765	0.0690874	0.0688699		0.0720894	0.089807	0.12566	0.113644	0.145977	0.084527	0.111923
	274	0.180781	0.076509	0.162916	0.18961	0.104984	0.142883	0.116138	0.025525	0.155127	0.117975	0.127245	0.05539	0.05672	0.068015	0.056499	0.070974	0.0792	0.0558619	0.0602673		0.0628659	0.113832	0.129712	0.117469	0.139654	0.1089	0.121913
	275	0.174406	0.155915	0.143827	0.137465	0.102514	0.135035	0.120655	0.06003	0.135087	0.098715	0.126365	0.048983	0.055673	0.06335	0.061317	0.08641	0.094905	0.0720632	0.0634773		0.0682723	0.12596	0.103588	0.12229	0.142767	0.088616	0.116644
	276	0.161136	0.162312	0.148826	0.036004	0.1101	0.189224	0.123604	0.060124	0.113777	0.102668	0.120777	0.057966	0.053807	0.071569	0.096154	0.098407	0.076204	0.0599949	0.0673291		0.0726789	0.101242	0.146132	0.124585	0.133331	0.08101	0.11726
	277	0.176583	0.091851	0.165643	0.185405	0.133386	0.148022	0.053558	0.067613	0.142712	0.090098	0.125487	0.090663	0.058586	0.065794	0.082251	0.08881	0.054961	0.0586723	0.0670724		0.0708512	0.12931	0.103268	0.134073	0.137806	0.086735	0.118238
	278	0.14206	0.11234	0.167188	0.171413	0.088754	0.102054	0.104894	0.029696	0.12238	0.090098	0.113088	0.065284	0.055108	0.06435	0.070086	0.075613	0.081197	0.0685914	0.0626427		0.067859	0.081837	0.135789	0.120377	0.139362	0.093769	0.114227
	279	0.180937	0.164861	0.140918	0.04495	0.122008	0.13382	0.101669	0.084581	0.148089	0.108244	0.123008	0.067734	0.04883	0.074456	0.086437	0.095288	0.096358	0.0679302	0.0741983		0.0764039	0.149293	0.141121	0.119612	0.131677	0.095895	0.12752
	280	0.16295	0.114938	0.140282	0.188922	0.083109	0.184179	0.085355	0.050076	0.113777	0.088882	0.121247	0	0.052365	0.065127	0.052707	0.073134	0.085373	0.0586723	0.0630921		0.0563088	0.091655	0.140161	0.104691	0.11942	0.108082	0.112802
	281	0.146155	0.190296	0.165461	0.137389	0.073407	0.096355	0.08895	0.099843	0.129907	0.104392	0.123215	0.064908	0.049764	0.073568	0.11764	0.082651	0.064494	0.0518942	0.0672007		0.071515	0.118106	0.118409	0.118387	0.148701	0.080028	0.116726
	282	0.160617	0.177753	0.130828	0.043344	0.069261	0.138118	0.059826	0.032445	0.146036	0.10652	0.106475	0.068708	0.053242	0.058464	0.101999	0.08849	0.079654	0.050737	0.0627069		0.0705001	0.086688	0.165645	0.120989	0.119614	0.094668	0.117521
	283	0.149628	0.152217	0.164279	0.171413	0.080198	0.143257	0.080378	0.087235	0.118176	0.107838	0.125462	0.0781	0.044476	0.0759	0.067479	0.075453	0.076023	0.0535474	0.0702181		0.0676496	0.111175	0.138455	0.114562	0.10833	0.107019	0.115908
	284	0.171814	0.134177	0.1381	0.060241	0.111423	0.129709	0.100378	0.04126	0.130493	0.111285	0.112888		0.043373	0.066349	0.093547	0.084251	0.066309	0.0705753	0.0645044		0.0698441	0.10078	0.138775	0.10362	0.123506	0.09156	0.111648
	285	0.181922	0.114538	0.155007	0.110093	0.058412	0.134942	0.078074	0.07586	0.135576	0.082901	0.112732	0.075304	0.053185	0.060907	0.088175	0.08897	0.058411	0.0642932	0.0733638		0.0703261	0.113947	0.12598	0.135604	0.120393	0.091642	0.117513
	286	0.17057	0.157565	0.154826	0.096024	0.101632	0.169417	0.085816	0.094914	0.131373	0.119293	0.128143	0.046376	0.057342	0.064461	0.098602	0.078812	0.072482	0.0540434	0.0746477		0.0683458	0.07918	0.13419	0.118081	0.13158	0.101375	0.112881
	287	0.177827	0.16511	0.173278	0.081727	0.073759	0.075988	0.116507	0.067518	0.138411	0.097498	0.116762	0.068739	0.055249	0.080897		0.082651	0.084647	0.0727244	0.0652106		0.072874	0.123419	0.14272	0.122137	0.121074	0.100312	0.121932
	288	0.171814	0.11079	0.161643	0.067199	0.065733	0.168296	0.102129	0.038322	0.152487	0.107534	0.114595	0.062206	0.049792	0.084895	0.079802	0.078972	0.078111	0.0586723	0.0701539		0.0703255	0.088882	0.124274	0.110583	0.133136	0.104074	0.11219
	289	0.172021	0.136126	0.168097	0.186475	0.069526	0.148302	0.068028	0.098231	0.14369	0.100539	0.129103	0.048166	0.048661	0.071124	0.110214	0.085211	0.091093	0.0556966	0.0767021		0.0733585	0.127115	0.136749	0.1203	0.124673	0.115361	0.12484
	290	0.172073	0.116437	0.177096	0.040286	0.109747	0.121394	0.082959	0	0.150435	0.097498	0.106792	0.067106	0.054118	0.083452	0.048441	0.081292	0.06876	0.0700793	0.0663662		0.0674518	0.092232	0.108919	0.105074	0.123214	0.102602	0.106408
	291	0.148177	0.128281	0.183913	0.144882	0.106395	0.139613	0.100747	0.074154	0.143885	0.10429	0.127434	0.061107	0.047586	0.079454	0.096548	0.077613	0.071575	0.0866112	0.0682279		0.0735903	0.147329	0.101882	0.125886	0.126035	0.101212	0.120469
	292	0.160876	0.155366	0.154826	0.148093	0.107101	0.134381	0.09107	0.05292	0.123455	0.103378	0.123147	0.071535	0.058303	0.068681	0.090387	0.081452	0.051693	0.0705753	0.064376		0.0696253	0.088074	0.101029	0.123667	0.133817	0.083054	0.105928
	293	0.182077	0.092151	0.131737	0.07561	0.057089	0.081126	0.090332	0.090743	0.147698	0.102161	0.105072	0.056741	0.054373	0.063573	0.062028	0.080492	0.081742	0.0852887	0.0745835		0.0698527	0.11568	0.132057	0.117699	0.187711	0.099412	0.130512
	294	0.151857	0.142523	0.139555	0.149775	0.062646	0.184833	0.06342	0	0.141637	0.098613	0.113486	0.051841	0.062488	0.065016	0.087622	0.074494	0.081379	0.0472653	0.0668156		0.0671151	0.085648	0.127366	0.118923	0.147047	0.090661	0.113929
	295	0.157507	0.152467	0.171915	0.056266	0.097928	0.164652	0.069411	0.114346	0.140562	0.089186	0.121424	0.074582	0.050329	0.084229	0.073324	0.078572	0.087371	0.0672689	0.0648254		0.0725627	0.127	0.147945	0.117393	0.138681	0.088452	0.123894
	296	0.159736	0.136526	0.151008	0.118656	0.076053	0.094113	0.115217	0	0.134697	0.115745	0.110175	0.044648	0.047671	0.069125	0.04931	0.08681	0.084012	0.0565231	0.0699613		0.0635076	0.105746	0.143573	0.141801	0.108719	0.104647	0.120897
	297	0.158958	0.132129	0.125193	0.154592	0.05506	0.160821	0.042038	0.080789	0.129809	0.106824	0.114621	0.061955	0.06147	0.063684	0.104527	0.071454	0.067489	0.073551	0.0711168		0.0719059	0.13497	0.115743	0.119765	0.128856	0.102193	0.120305
	298	0.175753	0.102895	0.138282	0.110093	0.080904	0.103269	0.070609	0.024577	0.120034	0.098613	0.102503	0.060699	0.042327	0.075122	0.087622	0.089929	0.092	0.0628053	0.0647612		0.0719082	0.082992	0.128859	0.119688	0.129148	0.100803	0.112298
	299	0.176686	0.103744	0.150553	0.077445	0.113716	0.121768	0.062683	0.077472	0.122575	0.096181	0.110282	0.062677	0.051602	0.070125	0.051838	0.076013	0.079745	0.0613174	0.0749687		0.0660358	0.130118	0.127046	0.134991	0.125743	0.094096	0.122399
	300	0.186276	0.164611	0.127829	0.174701	0.082051	0.122609	0.071346	0.074059	0.140464	0.096687	0.124063	0.052281	0.054231	0.067126	0.087622	0.092009	0.064857	0.0641278	0.0633489		0.0682003	0.105977	0.163086	0.134532	0.101715	0.110045	0.123071
	301	0.165023	0.154116	0.156825	0.068346	0.042711	0.16624	0.110424	0.105151	0.162947	0.101452	0.123324	0.071472	0.057851	0.071013	0.067163	0.076333	0.066218	0.0618134	0.071823		0.0679608	0.136818	0.09719	0.119382	0.123895	0.093033	0.114064
	302	0.16917	0.107992	0.16028	0.123779	0.105778	0.053471	0.077153	0.044199	0.139193	0.101452	0.108247	0.048606	0.062149	0.064905	0.08857	0.073054	0.078656	0.0636319	0.0694477		0.0686274	0.109096	0.102415	0.106222	0.141697	0.103829	0.112652
	303	0.179123	0.12883	0.125738	0.134942	0.072789	0.206321	0.107567	0.048749	0.137336	0.095167	0.123656	0.073357	0.046314	0.069125	0.080592	0.071774	0.049333	0.0545393	0.0589834		0.0630022	0.124574	0.129605	0.10867	0.120976	0.098349	0.116435
	304	0.178086	0.108042	0.147554	0.060089	0.103661	0.111211	0.064987	0.053299	0.118861	0.097498	0.104329	0.04647	0.048237	0.070014	0.066689	0.084651	0.085646	0.066277	0.0720156		0.0674999	0.088998	0.126939	0.105992	0.110081	0.093114	0.105025
	305	0.163676	0.14717	0.148008	0.114069	0.078523	0.131952	0.075033	0.085529	0.14975	0.115745	0.120945	0.077283	0.046172	0.062573	0.085015	0.08705	0.074026	0.0634666	0.0562871		0.0689841	0.128501	0.112438	0.107981	0.122338	0.092215	0.112695
	306	0.159892	0.101545	0.158189	0.198632	0.047915	0.084583	0.102867	0	0.143005	0.103479	0.110011		0.048378	0.064128	0.106581	0.069455	0.06985	0.0555312	0.0725292		0.0694932	0.111291	0.118409	0.128564	0.100061	0.088207	0.109306
	307	0.160462	0.132478	0.138828	0.070487	0.111158	0.179227	0.069042	0.095577	0.13411	0.109663	0.120103	0.060887	0.046681	0.065349	0.090703	0.077053	0.077657	0.0679302	0.07407		0.0700413	0.118337	0.137282	0.128028	0.127883	0.096222	0.12155
	308	0.162535	0.133378	0.16437	0.107646	0.084168	0.084677	0.037706	0	0.125997	0.105304	0.100578	0.052249	0.047416	0.065349	0.046308	0.089289	0.067853	0.0504063	0.06566		0.0605663	0.090846	0.133017	0.114485	0.12477	0.089025	0.110429
	309	0.163468	0.163761	0.134464	0.149775	0.081169	0.170445	0.064618	0.059461	0.166662	0.105203	0.125903	0.059882	0.054203	0.070236	0.084304	0.080492	0.082196	0.0664423	0.073107		0.0713578	0.12469	0.089513	0.105915	0.137514	0.090824	0.109691
	310	0.169429	0.095749	0.137191	0.110475	0.080639	0.096823	0.071623	0.055574	0.124041	0.095978	0.103752	0.059662	0.049792	0.065238	0.101446	0.083691	0.063767	0.0518942	0.0613587		0.0671061	0.097776	0.145706	0.103161	0.171659	0.095077	0.122676
	311	0.174095	0.153917	0.141918	0.076604	0.083374	0.122048	0.037522	0.089984	0.13499	0.09983	0.111428	0.068677	0.045013	0.060574	0.062502	0.078013	0.062678	0.0692527	0.0596896		0.0632999	0.122264	0.110199	0.121754	0.096364	0.094341	0.108984
	312	0.15787	0.138325	0.135555	0.180435	0.10569	0.131298	0.034388	0.047896	0.129222	0.087665	0.114834	0.046344	0.053496	0.0528	0.070718	0.083291	0.065674	0.0733857	0.0628995		0.063576	0.086341	0.101136	0.118311	0.160667	0.099249	0.113141
	313	0.171658	0.109191	0.136828	0.076757	0.067321	0.176144	0.032729	0.076713	0.11759	0.10946	0.107439	0.06073	0.051517	0.06013	0.081382	0.094888	0.051512	0.0609868	0.0732996		0.0668057	0.118914	0.109239	0.104309	0.098407	0.095323	0.105238
	314	0.156159	0.132378	0.141009	0.109634	0.045534	0.128962	0.034204	0.041829	0.130004	0.114326	0.103404	0.073011	0.055476	0.081675	0.06898	0.079852	0.073209	0.0882644	0.0636057		0.0730091	0.093387	0.123314	0.119841	0.139849	0.090006	0.113279
	315	0.187883	0.143872	0.152462	0.120032	0.120244	0.090937	0.040655	0.078609	0.141637	0.084827	0.116116	0.051998	0.053213	0.072901	0.104369	0.077053	0.062769	0.0732204	0.0648896		0.0700516	0.114641	0.154236	0.123744	0.123506	0.119533	0.127132
	316	0.166475	0.11099	0.147281	0.116668	0.106043	0.161288	0.044434	0.047706	0.132448	0.078238	0.111157	0.056019	0.062601	0.059463	0.068822	0.084811	0.093725	0.0604908	0.0579562		0.067986	0.095813	0.121608	0.113108	0.118836	0.083381	0.106549
	317	0.157352	0.083256	0.139464	0.084785	0.099868	0.142883	0.033651	0.051877	0.134697	0.090808	0.101864	0.05649	0.048434	0.057909	0.088886	0.068095	0.086009	0.0624746	0.0691267		0.067178	0.112099	0.131418	0.100712	0.134401	0.090824	0.113891
	318	0.16606	0.131979	0.134374	0.107264	0.092371	0.161475	0	0.069225	0.110747	0.089693	0.106319	0.070875	0.045126	0.063239	0.095522	0.076893	0.06404	0.0680955	0.0628995		0.0683362	0.093156	0.134083	0.112878	0.090625	0.090824	0.104313
	319	0.179123	0.157415	0.148554	0.121103	0.065556	0.045156	0	0.093966	0.127561	0.092024	0.103046	0.050836	0.053468	0.068126	0.068901	0.080812	0.090003	0.0475959	0.0551315		0.0643592	0.139128	0.148051	0.118311	0.126035	0.091315	0.124568
	320	0.187728	0.098847	0.137191	0.116515	0.097663	0.171285	0.041761	0.024672	0.136652	0.086246	0.109856	0.062458	0.052761	0.074567	0.081224	0.074414	0.082468	0.0680955	0.0630921		0.0698849	0.094427	0.141014	0.113414	0.131969	0.097776	0.11572
	321	0.195244	0.119586	0.163007	0.063147	0.091665	0.147368	0.028858	0.078799	0.121598	0.102364	0.111164	0.056553	0.051686	0.062129	0.064635	0.074653	0.085192	0.0935547	0.0655958		0.0692498	0.11672	0.108813	0.116628	0.101228	0.080846	0.104847
	322	0.172332	0.144122	0.149008	0.120644	0.059029	0.085518	0.034941	0.035762	0.121402	0.104594	0.102735	0.061547	0.05491	0.081342	0.107924	0.075773	0.072936	0.0611521	0.0714378		0.0733777	0.080913	0.137069	0.138205	0.122144	0.101621	0.11599
	323	0.202864	0.14682	0.160916	0.088531	0.239585	0.161942	0.027384	0.085434	0.130982	0.097093	0.134155	0.056992	0.046907	0.06335	0.077274	0.083131	0.083739	0.0623093	0.0639908		0.0672116	0.134277	0.09783	0.119994	0.138973	0.092215	0.116658
	324	0.160773	0.094249	0.13301	0.114298	0.182781	0.121488	0.178718	0	0.112409	0.092126	0.118985	0.054103	0.052478	0.075011	0.106818	0.077613	0.048516	0.0747083	0.0719514		0.0701498	0.085648	0.118196	0.119994	0.12156	0.105056	0.110091
	325	0.165282	0.144372	0.161552	0.145417	0.174313	0.112986	0.13918	0.093681	0.113093	0.114731	0.136461	0.078257	0.057257	0.069014	0.068901	0.100726	0.092182	0.0528861	0.0617439		0.0726209	0.10875	0.117663	0.119994	0.124284	0.103093	0.114757
	326	0.169015	0.154716	0.141464	0.087308	0.109747	0.073092	0.142682	0.023439	0.127365	0.104189	0.113302	0.058029	0.053242	0.054466	0.066689	0.075933	0.078565	0.0576804	0.0625785		0.0633979	0.130234	0.134936	0.114256	0.134012	0.090906	0.120869
	327	0.150354	0.084755	0.157734	0.15765	0.159142	0.167455	0.125631	0.094819	0.133621	0.10429	0.133545	0.062206	0.055928	0.069236	0.096391	0.076493	0.084556	0.0664423	0.0608451		0.0715122	0.092694	0.129712	0.106757	0.099672	0.082236	0.102214
	328	0.156781	0.136926	0.157189	0.072475	0.128447	0.090656	0.097152	0.021449	0.147209	0.115948	0.112423	0.060322	0.053355	0.091448	0.0862	0.078173	0.063767	0.0783453	0.0692551		0.0726082	0.122495	0.12374	0.112266	0.088193	0.105056	0.11035
	329	0.15082	0.12908	0.166824	0.127831	0.107983	0.156804	0.260192	0.084391	0.134697	0.082698	0.140132	0.056521	0.049537	0.07801		0.079212	0.056868	0.0864459	0.0668798		0.0676391	0.137049	0.1247	0.134456	0.133817	0.073567	0.120718
	330	0.165801	0.102595	0.140373	0.182805	0.127741	0.115321	0.194294	0.02562	0.118958	0.102668	0.127618	0.068017	0.051036	0.078232	0.076563	0.074254	0.078928	0.0586723	0.0757391		0.0701802	0.094311	0.116916	0.112955	0.114361	0.101293	0.107967
	331	0.169429	0.148919	0.141282	0.041356	0.110806	0.150451	0.188027	0.072163	0.140855	0.100033	0.126332	0.058469	0.041761	0.079787	0.105159	0.074494	0.077838	0.0661117	0.064055		0.0709593	0.125036	0.119795	0.120683	0.166795	0.078556	0.122173
	332	0.176583	0.139075	0.135192	0.150157	0.12827	0.084583	0.155585	0.079841	0.122771	0.083509	0.125557	0.053726	0.045437	0.084784	0.078933	0.072974	0.067035	0.0571844	0.0596896		0.0649704	0.092463	0.096551	0.099259	0.121463	0.094014	0.10075
	333	0.138794	0.176404	0.179096	0.154898	0.118127	0.162129	0.124157	0.07112	0.140464	0.091518	0.135671	0.067797	0.055673	0.060352	0.047098	0.069855	0.065038	0.0672689	0.0641192		0.0621501	0.101242	0.14336	0.123131	0.127494	0.103093	0.119664
	334	0.17254	0.135627	0.136646	0.064676	0.065468	0.127654	0.107014	0.063537	0.127756	0.110575	0.111149	0.065065	0.038877	0.064572	0.105633	0.067695	0.075024	0.0629706	0.0645686		0.0680507	0.136125	0.103375	0.100789	0.125257	0.092624	0.111634
	335	0.174717	0.108841	0.125556	0.107646	0.134356	0.127	0.105079	0.060598	0.135381	0.095572	0.117475	0.051935	0.05228	0.05069	0.071981	0.08593	0.067853	0.0499104	0.0580204		0.061075	0.082761	0.127579	0.138741	0.131677	0.108573	0.117866
	336	0.135477	0.14762	0.153462	0.145799	0.112217	0.127374	0.116968	0.044957	0.121695	0.095674	0.120124	0.059034	0.062234	0.069903	0.038093	0.083291	0.048516	0.0495797	0.0567364		0.0584234	0.114641	0.119049	0.129482	0.09831	0.081664	0.108629
	337	0.173369	0.131979	0.167097	0.060318	0.094047	0.131298	0.097705	0.043725	0.135381	0.104797	0.113972	0.055202	0.058501	0.069681	0.074351	0.08689	0.083285	0.0647891	0.0657242		0.0698029	0.134046	0.133017	0.107752	0.082842	0.105383	0.112608
	338	0.1813	0.122784	0.168551	0.101224	0.102514	0.080753	0.081484	0.053963	0.118567	0.096079	0.110722	0.059003	0.045352	0.069348	0.107845	0.082491	0.079109	0.0520595	0.0664304		0.0702047	0.132313	0.158927	0.119229	0.148896	0.09565	0.131003
	339	0.13755	0.136226	0.145736	0.167666	0.110894	0.151478	0.11153	0.068182	0.13587	0.097498	0.126263	0.070373	0.052591	0.069459	0.053418	0.076333	0.071665	0.0517289	0.0741983		0.0649708	0.085417	0.124913	0.125044	0.123214	0.091806	0.110079
	340	0.181092	0.13033	0.133465	0.07691	0.107013	0.12672	0.114019	0.069509	0.148284	0.106824	0.119417	0.068331	0.042638	0.059686	0.061712	0.071054	0.087371	0.0530514	0.0673933		0.0639046	0.095582	0.135363	0.104309	0.121463	0.099003	0.111144
	341	0.166475	0.120485	0.140736	0.138994	0.100397	0.137371	0.09365	0.03254	0.1389	0.111488	0.118104	0.055296	0.050131	0.066793	0.109108	0.079212	0.050422	0.0601602	0.0671365		0.0672823	0.096621	0.10732	0.128717	0.138876	0.077411	0.109789
	342	0.163261	0.141973	0.156098	0.125308	0.096075	0.164559	0.075402	0.080505	0.134012	0.10206	0.123925	0.05916	0.052704	0.05591	0.067321	0.074174	0.058502	0.0552006	0.0670724		0.0612555	0.10875	0.109666	0.112802	0.114069	0.083381	0.105734
	343	0.161395	0.130779	0.141282	0.134254	0.087608	0.114854	0.117613	0.03908	0.126388	0.083408	0.113666	0.049485	0.059208	0.073234	0.082883	0.080012	0.077657	0.0533821	0.0749045		0.0688457	0.120647	0.125766	0.128488	0.13693	0.09426	0.121218
	344	0.16663	0.097648	0.147645	0.031875	0.12236	0.106633	0.118903	0.101833	0.132253	0.0902	0.111598	0.064813	0.049735	0.066571	0.061317	0.072894	0.077385	0.0606561	0.0712452		0.065577	0.095697	0.106254	0.123897	0.100645	0.094178	0.104134
	345	0.154812	0.132978	0.148099	0.137542	0.120596	0.150638	0.112452	0	0.108499	0.103074	0.116869	0.062018	0.046398	0.065349	0.071665	0.080012	0.04897	0.0770227	0.0714378		0.0653591	0.128732	0.1263	0.108517	0.116404	0.11119	0.118229
	346	0.163935	0.139874	0.159825	0.116821	0.055766	0.105885	0.115401	0.076239	0.123748	0.095978	0.115347	0.05448	0.052252	0.051023	0.114006	0.076733	0.091547	0.0556966	0.0725292		0.0710333	0.095697	0.135043	0.114715	0.1094	0.09475	0.109921
	347	0.172384	0.116187	0.150826	0.113381	0.095458	0.126626	0.094388	0.0715	0.128049	0.098411	0.116721	0.061578	0.05556	0.059352	0.088096	0.082491	0.080925	0.0596642	0.0589192		0.0683232	0.109674	0.115637	0.116016	0.109886	0.093769	0.108996
	348	0.161084	0.089002	0.148826	0.104664	0.112481	0.123263	0.060932	0.08515	0.142321	0.118786	0.114651	0.067829	0.050046	0.076677	0.055235	0.074414	0.08265	0.0836355	0.073107		0.0704492	0.103783	0.109879	0.098187	0.141794	0.097286	0.110186
	349	0.189231	0.128231	0.143827	0.144423	0.096164	0.182123	0.066369	0.050645	0.148773	0.107838	0.125762	0.061986	0.050584	0.050912	0.063687	0.065216	0.048879	0.0447855	0.0625143		0.0560705	0.118683	0.101669	0.108211	0.142086	0.096059	0.113342
	350	0.141593	0.144572	0.146372	0.076527	0.151292	0.161756	0.087107	0.033393	0.114364	0.100337	0.115731	0.049391	0.047614	0.082896	0.083988	0.080652	0.066945	0.0530514	0.0705391		0.0668846	0.119376	0.141547	0.120683	0.114945	0.094914	0.118293
	351	0.178553	0.097548	0.144827	0.163767	0.104984	0.080846	0.093097	0.037753	0.14457	0.11169	0.115763	0.074142	0.053638	0.05913	0.064003	0.076733	0.068216	0.0586723	0.0711168		0.0657064	0.0838	0.134936	0.106222	0.115237	0.094014	0.106842
	352	0.170103	0.127581	0.157007	0.096942	0.094488	0.15671	0.067107	0.06695	0.130004	0.096789	0.116368	0.052564	0.050244	0.068681	0.071981	0.077373	0.092	0.0563578	0.0648254		0.0667533	0.100433	0.139201	0.111272	0.11047	0.081909	0.108657
	353	0.162069	0.14767	0.155007	0.03975	0.089725	0.108875	0.062867	0.037279	0.140757	0.101756	0.104576	0.060133	0.049594	0.080342	0.116534	0.073374	0.057776	0.0634666	0.057892		0.0698889	0.154259	0.139201	0.10515	0.093057	0.107264	0.119786
	354	0.165593	0.090801	0.148463	0.079356	0.120067	0.118872	0.072729	0.061831	0.132839	0.089693	0.108024	0.063808	0.048774	0.06957	0.059579	0.080892	0.051058	0.0573497	0.0598822		0.0613641	0.087496	0.132164	0.127493	0.117377	0.114707	0.115847
	355	0.132989	0.120085	0.1451	0.180894	0.094135	0.126439	0.107198	0.039459	0.113289	0.117773	0.117736	0.071786	0.067607	0.071235	0.069059	0.082411	0.084738	0.0652851	0.0561587		0.071035	0.135201	0.108813	0.115327	0.127786	0.094341	0.116294
	356	0.157352	0.151018	0.157734	0.086773	0.085226	0.157645	0.10471	0.069319	0.142419	0.09689	0.120909	0.062363	0.05491	0.069348	0.103658	0.077533	0.065038	0.0773534	0.0575068		0.0709638	0.095351	0.146452	0.120683	0.083621	0.101539	0.109529
	357	0.156211	0.160013	0.150553	0.097554	0.079228	0.112238	0.057061	0.049128	0.117394	0.096282	0.107566	0.04669	0.063478	0.05702	0.106344	0.076013	0.067671	0.0570191	0.0618723		0.0670134	0.109212	0.118196	0.101095	0.103271	0.095895	0.105534
	358	0.165905	0.107192	0.16137	0.164685	0.125889	0.140734	0.105908	0.045621	0.142028	0.108649	0.126798	0.051873	0.044815	0.058131		0.08777	0.046065	0.0489185	0.0561587		0.0562473	0.133468	0.122034	0.099871	0.115431	0.090743	0.112309
	359	0.180211	0.132278	0.16037	0.079356	0.123331	0.08748	0.061116	0.074912	0.138802	0.091923	0.112978	0.09148	0.048208	0.067571	0.104685	0.078892	0.070848	0.0518942	0.0592402		0.0716023	0.079642	0.125233	0.110124	0.119809	0.107101	0.108382
	360	0.155278	0.150518	0.131101	0.114222	0.125095	0.164839	0.085355	0.046474	0.11456	0.108041	0.119548	0.052375	0.040093	0.07379	0.109819	0.076333	0.065674	0.0690874	0.0591118		0.0682854	0.10078	0.105294	0.104309	0.087901	0.090661	0.097789
	361	0.190423	0.094899	0.133283	0.137618	0.044564	0.112986	0.09153	0.049887	0.132644	0.095065	0.10829	0.052501	0.051206	0.068792		0.074973	0.080834	0.0613174	0.0547463		0.0634814	0.115218	0.118196	0.107752	0.087609	0.092297	0.104214
	362	0.157611	0.145421	0.16737	0.032105	0.104808	0.106259	0.059273	0.043251	0.124433	0.101553	0.104208	0.046156	0.039923	0.063128	0.076721	0.070575	0.070848	0.0666076	0.0691909		0.0628937	0.122957	0.113398	0.099412	0.116696	0.096222	0.109737
	363	0.162328	0.143572	0.150008	0.194962	0.123772	0.099345	0.069503	0.088278	0.126681	0.106419	0.126487	0.078539	0.048915	0.081897	0.108872	0.08745	0.081107	0.0928934	0.07086		0.0813167	0.089114	0.087914	0.12711	0.091889	0.084118	0.096029
	364	0.168289	0.126182	0.135737	0.039827	0.101103	0.14036	0.084987	0.057565	0.136945	0.093342	0.108434	0.07031	0.052676	0.06857	0.067084	0.060097	0.054054	0.0628053	0.0633489		0.0623681	0.086226	0.14176	0.115862	0.119517	0.085263	0.109726
	365	0.156522	0.086953	0.130828	0.159791	0.119185	0.143817	0.058535	0.047043	0.129418	0.107433	0.113952	0.058626	0.044645	0.052023	0.088175	0.069375	0.072028	0.0459427	0.059176		0.0612488	0.121686	0.119369	0.117622	0.096364	0.09475	0.109958
	366	0.147814	0.158964	0.133919	0.095107	0.077376	0.105885	0.093097	0.047233	0.11583	0.080468	0.105569		0.051064	0.065794	0.108161	0.083611	0.085646	0.0687568	0.0775367		0.0772242	0.10078	0.151357	0.118617	0.082064	0.090252	0.108614
	367	0.158336	0.14852	0.146918	0.121868	0.088137	0.181376	0.071162	0.036331	0.134012	0.105912	0.119257	0.070153	0.044476	0.061018	0.061633	0.081692	0.08619	0.065781	0.0695761		0.0675649	0.111984	0.13419	0.112878	0.138681	0.083545	0.116256
	368	0.170414	0.106992	0.144918	0.119344	0.12042	0.092618	0.086738	0.067803	0.158548	0.095167	0.116296	0.057338	0.038961	0.081897	0.068664	0.067615	0.051058	0.0446202	0.0730428		0.0603995	0.125845	0.111905	0.112266	0.116501	0.10203	0.113709
	369	0.150457	0.155516	0.125193	0.160632	0.09484	0.144098	0.048766	0.082022	0.136749	0.102364	0.120064		0.06181	0.074678	0.082488	0.077933	0.063586	0.0527208	0.0778576		0.0701533	0.140976	0.104654	0.118617	0.172924	0.092869	0.126008
	370	0.174095	0.135577	0.149099	0.098089	0.130387	0.073839	0.060563	0.043441	0.151119	0.101249	0.111746	0.054982	0.045437	0.078121	0.062581	0.075693	0.088732	0.0760308	0.0609093		0.0678108	0.101473	0.128859	0.135986	0.104536	0.089107	0.111992
	371	0.163676	0.135677	0.139646	0.110016	0.099692	0.158672	0.23411	0.057849	0.109281	0.091518	0.130014	0.060824	0.045154	0.068237	0.08541	0.075693	0.051058	0.0684261	0.0673933		0.0652744	0.100664	0.131204	0.106375	0.09043	0.095486	0.104832
	372	0.176375	0.102745	0.131737	0.104053	0.027099	0.162129	0.202866	0.047043	0.113484	0.083813	0.115134	0.065536	0.045352	0.076011	0.070402	0.074653	0.084647	0.0661117	0.0633489		0.0682577	0.105977	0.1263	0.134915	0.075255	0.088371	0.106164
	373	0.181404	0.115838	0.131556	0.109558	0.104014	0.122048	0.166645	0.03472	0.111822	0.118685	0.119629	0.055547	0.049961	0.052134	0.067874	0.077453	0.090911	0.0631359	0.0587908		0.0644758	0.112215	0.10796	0.108134	0.092862	0.087962	0.101827
	374	0.146207	0.145621	0.158643	0.08058	0.101632	0.105044	0.100563	0.098136	0.127561	0.100641	0.116463	0.052595	0.050951	0.066238	0.042043	0.079292	0.077748	0.053878	0.059497		0.0602803	0.090615	0.128539	0.107905	0.110567	0.092215	0.105968
	375	0.157974	0.090402	0.159552	0.143047	0.093165	0.082902	0.336505	0	0.126192	0.098208	0.128795	0.080015	0.039584	0.070902	0.114796	0.076413	0.06059	0.0732204	0.057571		0.0716364	0.105169	0.111372	0.114332	0.126813	0.086817	0.108901
	376	0.163261	0.152967	0.138009	0.128367	0.077905	0.158112	0.245077	0.053299	0.133426	0.110474	0.13609	0.065881	0.053298	0.049802	0.083199	0.069935	0.079836	0.0485878	0.0801688		0.0663385	0.143748	0.130458	0.107522	0.093738	0.103665	0.115826
	377	0.150198	0.139874	0.152008	0.116057	0.096605	0.118591	0.256229	0.046379	0.124237	0.120003	0.132018		0.050386	0.066904		0.068415	0.068851	0.0614827	0.0607809		0.0628033	0.093734	0.121288	0.112419	0.070001	0.096468	0.098782
	378	0.153671	0.124583	0.138191	0.074692	0.097398	0.168576	0.182221	0.044673	0.130395	0.074893	0.118929	0.05137	0.051997	0.07279	0.119931	0.081372	0.060136	0.0661117	0.0627711		0.0708098	0.104707	0.09751	0.09834	0.056869	0.086408	0.0887668
	379	0.147555	0.136226	0.15828	0.143353	0.065204	0.092338	0.145723	0.021164	0.135283	0.10723	0.115236	0.072414	0.047869	0.078343	0.105317	0.08825	0.066491	0.0667729	0.0736206		0.0748847	0.089229	0.134297	0.098034	0.235572	0.100721	0.131571
	380	0.15336	0.128131	0.15228	0.164302	0.102602	0.101027	0.187843	0.077661	0.110649	0.09243	0.127029	0.057055	0.066984	0.062684	0.049863	0.085051	0.07448	0.0750389	0.0655958		0.067094	0.117528	0.129605	0.096963	0.207166	0.087962	0.127845
	381	0.167771	0.14812	0.151008	0.063147	0.046151	0.111024	0.158534	0.027515	0.131666	0.089389	0.109433	0.053789	0.045409	0.055354	0.082093	0.072334	0.080108	0.0702446	0.0661736		0.0656882	0.103436	0.119156	0.094821	0.202205	0.084608	0.120845
	382	0.163624	0.115987	0.149281	0.117968	0.10516	0.133353	0.197336	0.072921	0.14496	0.093748	0.129434	0.069054	0.047869	0.065238	0.088333	0.083531	0.053872	0.0618134	0.0707316		0.0675553	0.080451	0.136856	0.095739	0.195882	0.090906	0.119967
	383	0.162483	0.114138	0.150372	0.029428	0.094399	0.161102	0.184248	0.04382	0.158744	0.090301	0.118903	0.06073	0.041111	0.071458	0.070876	0.078173	0.070122	0.0604908	0.0646328		0.0646992	0.101704	0.126193	0.120759	0.166795	0.093196	0.121729
	384	0.191615	0.120285	0.141464	0.140218	0.063175	0.126907	0.132636	0.097283	0.128636	0.107534	0.124975		0.044843	0.073012	0.072771	0.081532	0.050513	0.0583417	0.0535907		0.0620862	0.11106	0.110732	0.120759	0.157359	0.084854	0.116953
	385	0.166164	0.132778	0.139191	0.14687	0.093253	0.13653	0.151806	0	0.134599	0.090707	0.11919	0.067263	0.057427	0.066571	0.094574	0.085211	0.083104	0.0834702	0.058534		0.0745193	0.116258	0.099856	0.116016	0.173118	0.102111	0.121472
	386	0.16238	0.143722	0.133192	0.041585	0.067409	0.076548	0.181668	0.088088	0.130298	0.105608	0.11305	0.068143	0.055278	0.060241	0.107371	0.069295	0.074298	0.0471	0.0668156		0.0685677	0.088767	0.101775	0.135374	0.162126	0.095241	0.116657
	387	0.175183	0.113639	0.13001	0.08402	0.072525	0.150638	0.143327	0.043062	0.127561	0.089693	0.112966	0.047601	0.048463	0.073679		0.069055	0.114514	0.0535474	0.0641834		0.0672918	0.108172	0.136536	0.133538	0.167087	0.091806	0.127428
	388	0.177775	0.117287	0.150553	0.085702	0.10569	0.115415	0.170516	0.080695	0.145351	0.091518	0.12405	0.063337	0.056691	0.052467	0.103658	0.065536	0.054326	0.0583417	0.0745193		0.0661095	0.098008	0.122994	0.122519	0.161056	0.099249	0.120765
	389	0.129878	0.123533	0.133192	0.047779	0.053561	0.143257	0.14812	0.024766	0.125997	0.104392	0.103447	0.057118	0.054316	0.068237	0.092125	0.071694	0.069396	0.0765268	0.0691909		0.0698255	0.082761	0.131098	0.118464	0.103466	0.107101	0.108578
	390	0.190164	0.133078	0.156462	0.107952	0.060617	0.118685	0.127659	0.073964	0.140659	0.105405	0.121465	0.062112	0.041648	0.082674		0.076493	0.048153	0.0647891	0.0632205		0.0627271	0.113947	0.118836	0.114944	0.180804	0.100639	0.125834
	391	0.138535	0.122134	0.135828	0.109711	0.094752	0.102709	0.135217	0.039459	0.118176	0.082394	0.107892	0.064374	0.062517	0.077899	0.108161	0.082811	0.07448	0.0707406	0.0632205		0.0755254	0.104014	0.100709	0.11724	0.105703	0.086408	0.102815
	392	0.170311	0.131479	0.16028	0.044109	0.0929	0.151665	0.16858	0.064769	0.103905	0.091822	0.117982	0.053537	0.055843	0.052911	0.105159	0.08585	0.086826	0.0533821	0.0678427		0.0701689	0.10644	0.111372	0.132772	0.149382	0.086162	0.117226
	393	0.166164	0.162712	0.132192	0.112157	0.095193	0.131204	0.172912	0.027989	0.140562	0.109967	0.125105	0.042952	0.052422	0.069459	0.04931	0.096248	0.066309	0.643902	0.065018		0.135703	0.106209	0.133657	0.130324	0.115918	0.099903	0.117202
	394	0.152531	0.132528	0.112012	0.066129	0.083638	0.12018	0.063144	0.090269	0.110258	0.09172	0.102241	0.05806	0.049905	0.072235	0.097733	0.068175	0.086735	0.0687568	0.0613587		0.0703698	0.109905	0.119582	0.123208	0.091889	0.078719	0.104661
	395	0.169015	0.130829	0.1371	0.073087	0.076935	0.119339	0.105171	0.021828	0.117785	0.109055	0.106014	0.080801	0.050612	0.072346	0.086595	0.077453	0.072119	0.0770227	0.07407		0.0738773	0.092001	0.105614	0.121142	0.154732	0.077738	0.110245
	396	0.150406	0.126981	0.127102	0.076374	0.063351	0.164745	0.171622	0.055574	0.125899	0.08797	0.115002	0.063934	0.050386	0.077899	0.056578	0.085371	0.043069	0.0718978	0.0568648		0.06325	0.111291	0.111265	0.122596	0.124478	0.08878	0.111682
	397	0.165853	0.087603	0.149735	0.113992	0.090518	0.136717	0.143604	0.039649	0.136749	0.095471	0.115989	0.055956	0.05081	0.064128	0.060764	0.084251	0.084102	0.0702446	0.0576994		0.0659944	0.11337	0.120435	0.114409	0.095002	0.101457	0.108935
	398	0.16466	0.123084	0.14819	0.118962	0.083991	0.098971	0.138719	0.077566	0.118665	0.09689	0.11697	0.053286	0.048774	0.058353	0.103105	0.067615	0.072119	0.053878	0.0623217		0.0649315	0.084031	0.10796	0.124432	0.090333	0.108818	0.103115
	399	0.149161	0.136576	0.139646	0.050914	0.069702	0.134101	0.13282	0.041545	0.112702	0.100337	0.10675	0.073168	0.050103	0.064794	0.075694	0.081052	0.053691	0.0636319	0.0618081		0.0654927	0.094427	0.131738	0.110812	0.096656	0.090661	0.104859
	400	0.141075	0.091701	0.116557	0.13456	0.035037	0.111304	0.113466	0.088278	0.123357	0.093038	0.104837	0.050239	0.043571	0.061463	0.044808	0.078492	0.0792	0.0591683	0.0583414		0.0594103	0.101819	0.112012	0.113337	0.149868	0.086898	0.112787
	401	0.159529	0.136526	0.12901	0.047779	0.100221	0.15998	0.16388	0.030454	0.121207	0.109055	0.115764	0.066384	0.046625	0.059908	0.107924	0.08745	0.051603	0.0634666	0.0553241		0.0673356	0.133699	0.104548	0.119306	0.067569	0.091642	0.103353
	402	0.171503	0.121235	0.155826	0.121179	0.069967	0.116629	0.135032	0.082022	0.11671	0.098005	0.118811	0.047601	0.048576	0.072679	0.069138	0.062337	0.067943	0.0656157	0.0672007		0.0626363	0.118452	0.102522	0.128947	0.068445	0.094914	0.102656
	403	0.152479	0.115937	0.136737	0.12722	0.105601	0.131298	0.108212	0.024387	0.112507	0.086753	0.110113	0.067734	0.045663	0.046914	0.089676	0.074254	0.074207	0.0747083	0.0692551		0.0678014	0.081144	0.086421	0.123284	0.092668	0.083381	0.0933796
	404	0.157455	0.124483	0.132828	0.037763	0.099163	0.066832	0.13024	0.077187	0.13235	0.093342	0.105164	0.066384	0.056607	0.072568	0.07522	0.074094	0.087007	0.0509023	0.0803614		0.070393	0.112215	0.130991	0.114332	0.103369	0.093851	0.110952
	405	0.178293	0.121185	0.141191	0.115827	0.086814	0.147181	0.145447	0.045052	0.144765	0.080468	0.120622	0.059128	0.038877	0.075345	0.076563	0.080012	0.062042	0.0492491	0.0486475		0.0612329	0.126307	0.115743	0.121984	0.060176	0.091233	0.103089
	406	0.157196	0.106793	0.1451	0.076527	0.097134	0.119806	0.151253	0.082685	0.137727	0.107534	0.118176	0.054762	0.05655	0.060463	0.080355	0.072734	0.069033	0.0624746	0.0581488		0.0643151	0.114756	0.105827	0.12229	0.097045	0.086081	0.1052
	407	0.156315	0.126832	0.078562	0.067964	0.058412	0.149984	0.121484	0	0.119056	0.120205	0.0998814	0.059976	0.053496	0.090559	0.073245	0.073614	0.087734	0.0490838	0.0650822		0.0690987	0.102512	0.109452	0.11349	0.087901	0.091233	0.100918
	408	0.182388	0.134527	0.147736	0.070716	0.089372	0.090937	0.072176	0.076429	0.124139	0.094964	0.108338	0.066447	0.051856	0.065016	0.087069	0.069695	0.074298	0.0552006	0.0685489		0.0672663	0.079526	0.111798	0.12229	0.088777	0.106528	0.101784
	409	0.148643	0.140674	0.14719	0.124467	0.068908	0.164091	0.072268	0.046285	0.114755	0.103885	0.113117	0.059536	0.051715	0.065127	0.076089	0.077453	0.049696	0.0659463	0.0578278		0.0629238	0.114871	0.119049	0.114256	0.091403	0.084936	0.104903
	410	0.152738	0.113839	0.162552	0.041815	0.04818	0.107287	0.137982	0.097663	0.122868	0.09912	0.108404	0.046407	0.050584	0.070569	0.062976	0.073934	0.083376	0.062144	0.056929		0.0633649	0.1203	0.118089	0.123973	0.206194	0.104565	0.134624
	411	0.166008	0.12963	0.154826	0.090825	0.071643	0.159513	0.140009	0	0.152878	0.096586	0.116192	0.066541	0.057936	0.065016	0.072455	0.067455	0.090276	0.0824783	0.0561587		0.0697895	0.124459	0.106574	0.1089	0.199481	0.073403	0.122563
	412	0.142786	0.12893	0.1431	0	0.058147	0.119993	0.080378	0.085434	0.128831	0.094761	0.098236	0.054291	0.056748	0.059575	0.095838	0.060577	0.074207	0.0479265	0.0593044		0.0635584	0.120762	0.105614	0.128717	0.217284	0.08379	0.131233
	413	0.134129	0.141623	0.117012	0.040209	0.069085	0.115602	0.099917	0	0.128831	0.095268	0.0941676	0.067295	0.045154	0.055354	0.091651	0.082891		0.0484225	0.0694477		0.065745	0.115334	0.137709	0.105686	0.192672	0.079047	0.12609
	414	0.156315	0.135477	0.126102	0.125461	0.056912	0.139052	0.132083	0.062305	0.113582	0.084016	0.113131	0.047664	0.054203	0.055576	0.065346	0.079612	0.076023	0.0500757	0.071181		0.0624601	0.121802	0.110625	0.114179	0.219132	0.090988	0.131345
	415	0.155745	0.124083	0.155553	0.035163	0.0413	0.11364	0.10941	0.047043	0.133328	0.096181	0.101145	0.05316	0.043514	0.053244	0.062423	0.069375	0.082559	0.0649544	0.0666872		0.0619896	0.084493	0.104974	0.116857	0.18129	0.091969	0.115917
	416	0.146103	0.13023	0.140918	0.157574	0.049503	0.153908	0.065448	0.077566	0.109085	0.103378	0.113371	0.049862	0.047784	0.077677	0.080513	0.062417	0.042706	0.0513983	0.0577636		0.0587651	0.096159	0.111692	0.113873	0.314953	0.088616	0.145059
	417	0.168496	0.124083	0.149735	0.107264	0.04474	0.143444	0.076323	0.022302	0.129125	0.084016	0.104953	0.059945	0.043995	0.066904	0.080039	0.062337	0.100715	0.0631359	0.0591118		0.0670228	0.117066	0.117023	0.121678	0.289757	0.085672	0.146239
	418	0.150302	0.151418	0.164734	0.123244	0.031157	0.117097	0.131807	0.097568	0.131764	0.11686	0.121595	0.053349	0.046992	0.051356	0.064635	0.076893	0.085373	0.0758655	0.0711168		0.0656975	0.100318	0.101775	0.108976	0.269037	0.08101	0.132223
	419	0.163468	0.139275	0.118648	0.291224	0.180664	0.124384	0.11789	0	0.126974	0.077224	0.133975	0.048826	0.049594	0.05491	0.05642	0.082491	0.047971	0.0556966	0.0567364		0.0565806	0.104129	0.118302	0.111807	0.25425	0.097286	0.137155
	420	0.155641	0.141024	0.165824	0.081421	0.181281	0.093459	0.089503	0.096715	0.11456	0.100033	0.121946	0.065096	0.045522	0.053022	0.087385	0.08913	0.094996	0.0692527	0.07407		0.0723092	0.106093	0.10796	0.114715	0.293746	0.084608	0.141424
	421	0.18327	0.106643	0.131192	0.10627	0.11698	0.159794	0.09494	0.023155	0.146036	0.095978	0.116426	0.066447	0.055391	0.060574	0.08462	0.080332	0.058956	0.0591683	0.0634773		0.0661207	0.108519	0.122034	0.117699	0.227304	0.090988	0.133309
	422	0.148436	0.123433	0.156916	0.223099	0.104278	0.083556	0.111346	0.080031	0.128049	0.118279	0.127742	0.050522	0.046681	0.056798	0.055867	0.081132	0.067489	0.0581763	0.0614229		0.059761	0.108634	0.113718	0.103161	0.206096	0.085917	0.123505
	423	0.183114	0.136776	0.138282	0.075304	0.108865	0.16297	0.060932	0	0.12629	0.111082	0.110362	0.060918	0.048519	0.068348	0.079091	0.074254	0.049151	0.0518942	0.0709884		0.0628955	0.096506	0.118729	0.117699	0.302696	0.099167	0.146959
	424	0.184566	0.116987	0.143827	0.123932	0.084873	0.127187	0.108304	0.061641	0.139486	0.102668	0.119347		0.052308	0.068903	0.101209	0.079692	0.093725	0.054374	0.0648896		0.0735858	0.114178	0.120328	0.105456	0.202205	0.100394	0.128512
	425	0.160773	0.114238	0.118012	0.109711	0.07473	0.169417	0.099641	0.049128	0.125997	0.086044	0.110769	0.060604	0.040573	0.067682	0.066215	0.068735	0.085555	0.0727244	0.0608451		0.0653667	0.122726	0.111265	0.106987	0.21242	0.078801	0.12644
	426	0.12371	0.131479	0.156371	0.141288	0.071731	0.163904	0.091254	0.052541	0.107521	0.093444	0.113324	0.059631	0.055051	0.064683	0.085331	0.082811	0.090094	0.0684261	0.0793342		0.0731702	0.109789	0.115317	0.102625	0.174091	0.088043	0.117973
	427	0.166319	0.126332	0.12183	0.114298	0.072789	0.110837	0.071346	0.054816	0.117883	0.092531	0.104898	0.063306	0.049961	0.089004	0.082804	0.064256	0.072664	0.0561925	0.0688699		0.0683822	0.099509	0.103588	0.113261	0.263978	0.085017	0.133071
	428	0.160203	0.150918	0.133192	0.124391	0.064145	0.111117	0.105816	0.069319	0.107228	0.096992	0.112332	0.047475	0.049735	0.063017	0.088017	0.085371	0.056414	0.0685914	0.0676501		0.0657838	0.113485	0.110519	0.10691	0.204929	0.096631	0.126495
	429	0.17736	0.143173	0.145827	0.033099	0.071202	0.114294	0.114387	0.050835	0.126583	0.087767	0.106453	0.065253	0.044051	0.082119	0.081303	0.071694	0.067217	0.0535474	0.0547463		0.0649913	0.110136	0.138455	0.114638	0.187516	0.099576	0.130064
	430	0.148436	0.152467	0.166006	0.182117	0.052061	0.165399	0.147198	0.082496	0.136749	0.1124	0.134533	0.050459	0.052082	0.060574	0.083988	0.073614	0.085101	0.0689221	0.057892		0.066579	0.088882	0.127792	0.093367	0.181874	0.099494	0.118282
	431	0.15647	0.120435	0.120648	0.08295	0.051179	0.096916	0.104894	0.037184	0.112213	0.080975	0.0963864	0.055171	0.041082	0.061018	0.051601	0.074414	0.061135	0.0613174	0.073749		0.0599359	0.11441	0.107533	0.095356	0.131483	0.087716	0.1073
	432	0.165697	0.115238	0.104104	0.122326	0.063704	0.160448	0.036324	0.068845	0.134794	0.096383	0.106786	0.044617		0.060685	0.091256	0.083291	0.106162	0.0542087	0.0602673		0.0714981	0.104938	0.087061	0.102243	0.13586	0.105465	0.107113
	433	0.145792	0.105443	0.140282	0.074386	0.060352	0.104017	0.155954	0.07823	0.122966	0.087868	0.107529	0.061138	0.043656	0.064461	0.060606	0.080092	0.077657	0.0594989	0.0629637		0.0637591	0.092463	0.09911	0.095815	0.140627	0.081582	0.101919
	434	0.167304	0.118786	0.151553	0.161244	0.079934	0.110463	0.109318	0.023155	0.132644	0.085435	0.113984	0.06852	0.052591	0.067126	0.052865	0.070974	0.040255	0.0601602	0.0722724		0.0605954	0.108172	0.127366	0.111195	0.121463	0.088616	0.111362
	435	0.167511	0.140974	0.116557	0.067734	0.060882	0.109435	0.047936	0.06894	0.128538	0.107737	0.101624	0.058437	0.056409	0.078121	0.068111	0.080732	0.071121	0.0603255	0.0702823		0.0679423	0.11233	0.101775	0.095433	0.153079	0.091479	0.110819
	436	0.156678	0.134078	0.138828	0.136089	0.053296	0.147741	0.121853	0.062494	0.137825	0.099323	0.118821	0.05627	0.05327	0.061907	0.101525	0.083451	0.071393	0.0651197	0.0625785		0.0694393	0.099509	0.125873	0.120913	0.22205	0.080519	0.129773
	437	0.169118	0.118386	0.155189	0.121256	0.073318	0.112986	0.101208	0.099179	0.135185	0.092937	0.117876	0.073294	0.047869	0.078454	0.078143	0.077693	0.053781	0.0581763	0.0583414		0.065719	0.070517	0.106893	0.104844	0.116307	0.097286	0.0991694
	438	0.160358	0.096398	0.137919	0.08058	0.047298	0.138118	0.106277	0	0.134892	0.106115	0.100795		0.052506	0.063128	0.091177	0.073694	0.067308	0.0609868	0.0529488		0.0659641	0.105862	0.11585	0.119841	0.158818	0.095323	0.119139
	439	0.137757	0.139425	0.117103	0.126073	0.073936	0.118965	0.041485	0.130461	0.1302	0.099729	0.111513	0.062866	0.041365	0.068681	0.075141	0.070095	0.06994	0.058507	0.0608451		0.06343	0.125729	0.114997	0.126575	0.116015	0.094423	0.115548
	440	0.173628	0.115438	0.134192	0.122938	0.073759	0.140547	0.068489	0	0.133328	0.10652	0.106884		0.052337	0.056687	0.08154	0.077613	0.070031	0.0618134	0.0568648		0.0652695	0.098123	0.111159	0.104997	0.119614	0.100557	0.10689
	441	0.143978	0.130879	0.122011	0.044109	0.046416	0.074773	0.107475	0.09662	0.121598	0.090098	0.0977957	0.07433	0.040715	0.066904	0.057289	0.08633	0.069214	0.0689221	0.0599464		0.0654563	0.090269	0.110412	0.107446	0.119322	0.086326	0.102755
	442	0.152945	0.141523	0.120739	0.149087	0.064322	0.128215	0.112083	0.024482	0.127658	0.105507	0.112656	0.048135	0.049339	0.049246	0.053892	0.064336	0.081742	0.0651197	0.0675859		0.0599245	0.1054	0.097937	0.097575	0.127008	0.084118	0.102408
	443	0.129101	0.11104	0.133555	0.121791	0.058588	0.107006	0	0.100885	0.118763	0.105101	0.098583	0.061107	0.04719	0.071346	0.089518	0.076173	0.082922	0.0745429	0.0636698		0.0708086	0.104822	0.122141	0.112343	0.109886	0.099085	0.109655
	444	0.148384	0.113439	0.146463	0.078439	0.067938	0.148115	0.101484	0.028937	0.107619	0.089896	0.103071	0.05583	0.054401	0.065572	0.098128	0.067535	0.086009	0.0634666	0.0696403		0.0700727	0.101819	0.122461	0.104768	0.109011	0.096386	0.106889
	445	0.157559	0.12953	0.138646	0.081727	0.067938	0.12046	0.124894	0.054152	0.136847	0.079961	0.109171	0.073168	0.044787	0.058131		0.065856	0.072846	0.053878	0.057892		0.0609369	0.132429	0.1263	0.097652	0.097824	0.096468	0.110135
	446	0.149369	0.14837	0.125284	0.126684	0.056471	0.128495	0.062959	0.049223	0.122575	0.083408	0.105284		0.042949	0.063795	0.099076	0.076653	0.060862	0.0558619	0.0662378		0.0664907	0.11337	0.10604	0.106757	0.179442	0.082155	0.117553
	447	0.163624	0.121235	0.150644	0.160326	0.065468	0.147181	0.048674	0.053773	0.110845	0.081887	0.110366	0.069493	0.038537	0.074012	0.089439	0.066176	0.071847	0.0757002	0.0493537		0.0668197	0.103436	0.112758	0.114791	0.115723	0.08927	0.107196
	448	0.142423	0.120385	0.15328	0.121409	0.07473	0.134101	0.112268	0.043536	0.107815	0.095268	0.110521	0.070498	0.04555	0.056576	0.049389	0.082411	0.062587	0.0652851	0.0551315		0.0609284	0.103321	0.099856	0.110965	0.141113	0.098022	0.110655
	449	0.155641	0.120635	0.156553	0.078515	0.04377	0.13653	0.115678	0.074154	0.13714	0.108244	0.112686	0.067734	0.04719	0.071346	0.077669	0.074813	0.069577	0.0598295	0.063734		0.0664866	0.121686	0.104761	0.105456	0.0915	0.070622	0.098805
	450	0.158647	0.123833	0.128283	0.054048	0.043946	0.140267	0.065448	0.027895	0.134794	0.09537	0.0972531		0.049028	0.066904	0.083041	0.071134	0.078837	0.0510676	0.0553241		0.065048	0.121917	0.099003	0.106222	0.086247	0.092951	0.101268
	451	0.14009	0.115088	0.111285	0.147175	0.070143	0.099158	0.075955	0.065528	0.111138	0.094457	0.103002	0.053663	0.043853	0.066571	0.055788	0.068655	0.057776	0.0649544	0.0707958		0.060257	0.106093	0.115957	0.086404	0.155316	0.088371	0.110428
	452	0.172332	0.124783	0.123284	0.112004	0.07764	0.133727	0.044158	0.040692	0.122575	0.101046	0.105224	0.069148	0.047841	0.067682	0.095443	0.076893	0.075297	0.0576804	0.053013		0.0678747	0.119607	0.110839	0.100712	0.119031	0.083872	0.106812
	453	0.144393	0.126582	0.112012	0.105964	0.030363	0.104484	0.063697	0.079557	0.118274	0.098005	0.0983331	0.083062	0.05064	0.057353	0.057605	0.083051	0.079926	0.0692527	0.0654032		0.0682866	0.112677	0.115424	0.10691	0.126424	0.098104	0.111908
	454	0.136721	0.132728	0.161279	0.081344	0.192748	0.122235	0.036324	0.038417	0.139291	0.08949	0.113058		0.04046	0.066682	0.065978	0.077933	0.064494	0.0504063	0.064376		0.0614756	0.109905	0.11649	0.101937	0.112124	0.086735	0.105438
	455	0.150768	0.116437	0.162734	0.115216	0.192307	0.06842	0.048029	0.052351	0.127756	0.082597	0.111662	0.050082	0.048887	0.062573	0.082251	0.084411	0.091183	0.0547046	0.0576352		0.0664659	0.113023	0.135789	0.094668	0.102104	0.105465	0.11021
	456	0.163313	0.123583	0.136737	0.111775	0.147587	0.123076	0.070885	0.038417	0.120131	0.098005	0.113351	0.062772	0.046172	0.073679	0.067874	0.08769	0.058048	0.0609868	0.0560945		0.0641645	0.118799	0.112118	0.116092	0.155413	0.088616	0.118208
	457	0.180263	0.114238	0.114012	0.12829	0.129329	0.087199	0.087936	0.046379	0.122282	0.110879	0.112081	0.052438	0.041422	0.066904	0.06819	0.079772	0.043069	0.0563578	0.0706032		0.0598445	0.091655	0.108599	0.115709	0.102201	0.092951	0.102223
	458	0.138017	0.117637	0.135464	0.083714	0.129858	0.137371	0.068858	0.044294	0.131373	0.100134	0.108672	0.061641	0.054175	0.079676	0.085568	0.070895	0.087915	0.0558619	0.0576352		0.0691709	0.115103	0.134083	0.097805	0.103952	0.093278	0.108844
	459	0.16352	0.135277	0.120921	0.143964	0.10666	0.080099	0	0.040028	0.146818	0.094356	0.103164	0.0683	0.040517	0.054688	0.08312	0.069055	0.051421	0.065781	0.0668156		0.0624622	0.08611	0.105187	0.112419	0.105411	0.079374	0.0977002
	460	0.159477	0.131779	0.12692	0.071252	0.232705	0.151759	0.068213	0.059271	0.121891	0.093444	0.121671		0.05918	0.06957	0.052707	0.081212	0.053872	0.0692527	0.0604599		0.0637505	0.110251	0.10668	0.110736	0.121268	0.099085	0.109604
	461	0.161654	0.133378	0.138646	0.029123	0.204744	0.127934	0.072084	0.083444	0.103025	0.086348	0.114038	0.051778	0.055165	0.06646	0.088017	0.075853	0.080199	0.0631359	0.0614871		0.0677619	0.111175	0.127792	0.101325	0.087998	0.091806	0.104019
	462	0.149213	0.133028	0.132465	0.117509	0.205626	0.109435	0	0	0.132057	0.095471	0.10748	0.073388	0.047982	0.056465	0.090861	0.070175	0.057231	0.0666076	0.0544253		0.0646419	0.107017	0.100069	0.097269	0.082842	0.087798	0.094999
	463	0.164712	0.120585	0.130828	0.084785	0.166551	0.143163	0.067015	0.071594	0.117492	0.103479	0.11702		0.051884	0.057575	0.098286	0.073534	0.083104	0.0712366	0.0728502		0.0726385	0.101473	0.113078	0.095433	0.126716	0.105874	0.108515
	464	0.164453	0.108042	0.123011	0.064064	0.156408	0.140921	0.081116	0.029506	0.111627	0.091011	0.107016	0.064154	0.045918	0.070569	0.051522	0.084571	0.048153	0.0583417	0.0562229		0.0599314	0.096159	0.128752	0.101707	0.103758	0.094341	0.104943
	465	0.134647	0.137825	0.124193	0.119727	0.149175	0.111771	0	0.049413	0.127463	0.085841	0.104006	0.061735	0.047671	0.048913	0.068664	0.08889	0.053418	0.06264	0.0593686		0.0614124	0.119723	0.127899	0.099641	0.0808	0.085099	0.102632
	466	0.155174	0.118236	0.117285	0.035775	0.109835	0.152506	0.06342	0.036521	0.125899	0.088679	0.100333	0.052438	0.044702	0.071569	0.073166	0.077613	0.060953	0.0558619	0.0591118		0.0619268	0.09974	0.11745	0.11372	0.115042	0.087635	0.106717
	467	0.156211	0.138325	0.16437	0.087537	0.122449	0.160354	0.06213	0.055953	0.130395	0.088071	0.11658	0.05894	0.043345	0.051023	0.074509	0.079612	0.075387	0.0773534	0.0738774		0.0667558	0.097315	0.147518	0.102472	0.088485	0.103338	0.107826
	468	0.144755	0.112789	0.130556	0.117815	0.13859	0.086265	0	0.058892	0.117688	0.082901	0.0990251	0.054919	0.043147	0.058908	0.074114	0.083931	0.060318	0.0499104	0.0726576		0.0622381	0.101588	0.121715	0.110047	0.120101	0.09884	0.110458
	469	0.147192	0.115188	0.134464	0.03761	0.112658	0.133634	0.072913	0.059366	0.12062	0.083408	0.101705	0.050145	0.040291	0.081786	0.085173	0.061137	0.069577	0.0598295	0.0658526		0.0642239	0.100433	0.118196	0.12382	0.096656	0.093523	0.106526
	470	0.14574	0.120585	0.143736	0.043879	0.118303	0.14634	0.078259	0.035857	0.124335	0.091518	0.104855	0.065787	0.045069	0.063128	0.064161	0.069375	0.072846	0.058011	0.0566081		0.0618731	0.098123	0.111478	0.103084	0.11621	0.10252	0.106283
	471	0.163987	0.139175	0.162643	0.066052	0.107807	0.095701	0.073835	0.055953	0.121402	0.090909	0.107746	0.062929	0.044787	0.057353	0.05405	0.084011	0.061861	0.0656157	0.0476203		0.0597784	0.098123	0.115424	0.108593	0.101812	0.08878	0.102546
	472	0.145118	0.139075	0.13601	0.036539	0.105954	0.112519	0	0.063347	0.127463	0.078948	0.0944973	0.054668	0.039273	0.058908	0.102631	0.064816	0.057503	0.0380074	0.0623217		0.059766	0.103667	0.095911	0.101937	0.077784	0.088698	0.0935994
	473	0.166475	0.113539	0.143191	0	0.121126	0.155122	0.216045	0.03017	0.104882	0.086753	0.11373	0.058908	0.04589	0.054244	0.072139	0.068335	0.053963	0.0798332	0.0684847		0.0627246	0.102512	0.111478	0.088623	0.076617	0.091397	0.0941254
	474	0.157974	0.121434	0.129829	0.081803	0.11892	0.109249	0.210976	0.053678	0.125997	0.083205	0.119307	0.066981	0.049311	0.058353	0.055709	0.078013	0.088188	0.0471	0.0643118		0.0634958	0.102397	0.114251	0.09704	0.059203	0.084854	0.091549
	475	0.169948	0.127331	0.146463	0.070258	0.101015	0.138772	0.145908	0.050455	0.123064	0.105	0.117821	0.067106	0.054656	0.063795	0.087069	0.074334	0.08501	0.0540434	0.065339		0.068919	0.103898	0.119369	0.101784	0.080605	0.087962	0.0987236
	476	0.155537	0.101545	0.124102	0	0.113805	0.090656	0.133926	0.079652	0.129613	0.081786	0.101062	0.053443	0.043797	0.050579	0.079723	0.076733	0.049696	0.0599949	0.0607167		0.0593353	0.09639	0.099749	0.106145	0.058814	0.108082	0.093836
	477	0.153671	0.12973	0.157007	0.080809	0.120773	0.154655	0.144249	0.036616	0.131764	0.098309	0.120758		0.051856	0.065905	0.056736	0.062497	0.067217	0.0723938	0.0535265		0.0614473	0.104822	0.119369	0.119918		0.093442	0.109388
	478	0.172695	0.124683	0.103559	0.071099	0.113716	0.119526	0.105171	0.064295	0.121207	0.075096	0.107105	0.052375	0.040234	0.078454	0.083751	0.074254	0.082559	0.074047	0.066944		0.0690772	0.117297	0.10764	0.095586		0.087471	0.101998
	479	0.161602	0.116187	0.097741	0	0.101632	0.133634	0.115032	0.05273	0.110649	0.082597	0.0971804	0.064562	0.045211	0.060463	0.047651	0.078972	0.055052	0	0.0690625		0.0526217	0.101011	0.109239	0.100789		0.081337	0.098094
	480	0.138431	0.131029	0.155735	0.027135	0.104808	0.159513	0.078996	0.075955	0.127072	0.075907	0.107458	0.0536	0.047332	0.064239	0.080908	0.080972	0.074933	0	0.0490969		0.0563851	0.075946	0.112758	0.11395		0.097367	0.100005
		EPSC short term depression tau 600Hz				EPSC short term depression steady-state amplitude 600Hz
		WT (n=10)	Kv3.3 KO (n=8)	Kv3.1 KO (n=5)		WT (n=10)	Kv3.3 KO (n=8)	Kv3.1 KO (n=5)
		13.73	6.086	11.51		0.158019	0.0599679	0.105593				5.27493
		9.651	4.092	12.18		0.12586	0.048628	0.114614				4.36868
		11.28	5.556	27.8		0.137253	0.064998	0.110683				7.49149
		11.81	6.099	38.59		0.093367	0.077201	0.143076				9.46877
		10.05	5.598	8.107		0.091197	0.076005	0.091548				4.00229
		10.31	7.166			0.126158	0.0704506					4.41815
		10.53	4.696			0.103413	0.059578					3.84725
		7.809	6.146			0.0536855	0.06273					3.51785
		15.08				0.125619						7.60281
		10.73				0.0947885						5.41239
	Average	11.098	5.67988	19.6374		0.110936	0.0649448	0.113103				6.11738
	One way ANOVA & Tukey’s multiple comparisons		P=<0.1655 compared to WT	P=0.0443 Compared to WT			P=0.0009 compared to WT	P=0.0983 Compared to WT
Raw data used to generate normalised amplitudes for EPSC trains	100Hz	Raw EPSC amplitudes - conditioning train only -100Hz stimulation (nA)
	Time (s)	WT (n=21)																					Average	Kv3.3 KO (n=21)																					Average	Kv3.1 KO (n=17)
	0.01	-14.2514	-14.9258	-11.7889	-14.6603	-13.9415	-13.2215	-15.5466	-11.4279	-12.36	-14.6758	-12.5121	-14.8814	-13.0395	-11.8366	-11.5847	-15.4281	-12.7004	-12.0489	-10.8543	-12.2476	-10.8481	-13.0848	-12.5573	-15.0766	-18.9988	-15.0706	-25.0425	-27.684	-19.1989	-17.7681	-19.0241	-17.2223	-22.4287	-16.7121	-21.7867	-14.1444	-14.1396	-12.378	-17.6699	-10.6498	-13.7019	-25.9242	-19.3827	-17.9315	-14.0132	-10.7893	-15.4105	-15.8827
	0.02	-13.4595	-14.0057	-9.96398	-11.8298	-13.0519	-11.6208	-13.0593	-10.3182	-10.8476	-13.5406	-11.3555	-12.054	-12.1056	-11.258	-11.0756	-14.1244	-11.3723	-10.4949	-9.77152	-11.1795	-9.52729	-11.7151	-9.90537	-11.2054	-15.1242	-13.4867	-17.2742	-21.1669	-13.2739	-13.034	-13.7329	-5.68417	-13.7727	-10.6122	-13.1814	-11.4357	-11.7763	-10.6409	-14.598	-7.05847	-10.4902	-19.0138	-16.304	-12.9891	-13.9377	-9.60155	-13.3267	-14.9586
	0.03	-12.9514	-12.8781	-7.90252	-10.4214	-11.5229	-9.50749	-11.1638	-9.24768	-9.88079	-11.5661	-10.3606	-10.2015	-10.8568	-10.5903	-9.05294	-12.5228	-10.3274	-8.39775	-8.84013	-9.99782	-8.43964	-10.3157	-8.55954	-9.56357	-13.6675	-11.468	-13.6259	-17.0913	-11.7526	-11.1654	-11.5792	-3.68465	-11.1958	-8.02189	-9.88854	-8.56336	-9.42399	-7.63675	-12.809	-5.7694	-7.22608	-16.5895	-13.743	-10.6202	-13.4982	-8.01341	-11.5177	-14.0175
	0.04	-12.2479	-11.5018	-6.7047	-9.2724	-11.4146	-9.10924	-9.79689	-8.2052	-9.05193	-11.0747	-9.26196	-9.1914	-10.2233	-10.2039	-8.11788	-10.2145	-9.35814	-5.53521	-7.87333	-9.39358	-7.6767	-9.30616	-7.28086	-8.22385	-12.4162	-9.01894	-11.2577	-14.8468	-9.43628	-9.72518	-10.073	-3.53329	-9.0779	-6.47526	-8.42797	-7.30482	-8.35099	-6.04496	-11.7525	-4.69397	-5.81373	-14.6229	-12.3734	-9.08336	-13.0355	-7.87425	-10.2445	-13.2875
	0.05	-12.4677	-10.8899	-6.52465	-7.70075	-10.615	-8.52025	-8.98782	-7.40076	-8.37811	-9.45731	-8.57379	-8.01648	-9.17105	-9.78097	-7.44283	-10.6124	-9.08348	-5.17266	-7.56449	-8.66482	-6.24116	-8.63173	-7.03824	-7.84238	-11.753	-8.22548	-10.861	-13.1469	-8.27356	-8.88155	-9.1984	-2.69955	-8.56154	-6.05167	-7.46239	-6.18665	-7.82487	-5.19413	-11.2386	-4.01037	-4.43067	-12.9872	-9.86239	-8.17764	-12.8115	-7.13939	-9.20686	-12.743
	0.06	-11.8512	-10.7159	-5.69305	-7.05835	-10.406	-8.31883	-8.36435	-7.51184	-7.76775	-9.37491	-8.6333	-7.5404	-8.69498	-9.62655	-6.51266	-9.09509	-8.24974	-4.76738	-7.16288	-8.49025	-5.7248	-8.16953	-6.37906	-7.34799	-10.75	-7.53731	-10.1728	-12.2451	-7.89209	-8.49589	-8.29373	-2.43709	-7.16994	-5.13615	-6.50231	-5.80091	-6.68718	-4.63138	-10.9548	-3.82605	-4.01197	-12.4476	-8.0643	-7.46589	-12.632	-6.92088	-9.12996	-12.3549
	0.07	-11.102	-10.5405	-5.71593	-7.14838	-10.2031	-7.42772	-8.00853	-7.33118	-7.38079	-7.50571	-7.78643	-7.01092	-7.67203	-9.38302	-6.21359	-8.05505	-7.88353	-4.03008	-6.84428	-8.09231	-5.27436	-7.64807	-6.26615	-7.13437	-10.2637	-6.86287	-8.64234	-10.7788	-7.02539	-7.99111	-7.41437	-2.54452	-7.35426	-4.83097	-6.30517	-5.53358	-5.6508	-4.77543	-10.2455	-3.5697	-3.97657	-11.9569	-6.75326	-6.94647	-12.3329	-6.75365	-8.2718	-12.2438
	0.08	-10.8105	-10.4428	-5.27496	-7.41693	-9.79718	-7.49333	-7.38122	-6.58899	-7.11956	-6.94876	-7.04638	-6.46466	-6.75162	-9.23654	-6.02926	-7.67541	-7.42699	-4.22905	-6.64896	-7.38796	-4.83124	-7.28582	-5.77634	-6.51639	-10.3065	-5.8741	-8.09303	-11.2152	-6.81635	-7.31069	-7.21046	-2.25033	-6.63283	-5.09586	-6.00732	-4.86219	-5.18449	-4.26639	-9.79937	-3.34265	-3.39063	-10.746	-6.59457	-6.5377	-12.3428	-5.53416	-7.84822	-12.1717
	0.09	-10.8121	-9.10767	-4.58678	-6.34119	-9.46759	-8.19219	-7.11221	-5.90418	-6.60198	-6.25296	-6.77478	-5.69867	-5.59928	-8.74887	-5.81442	-7.23718	-7.70653	-4.28276	-6.54276	-7.75661	-4.81415	-6.92166	-5.48642	-6.6644	-9.82631	-6.26167	-8.23646	-9.57179	-5.8642	-7.0557	-6.86256	-2.40292	-6.3484	-4.63322	-5.57458	-5.1283	-4.80851	-4.33597	-9.64007	-3.0802	-3.50049	-9.21888	-5.87436	-6.20835	-12.2327	-5.96751	-7.76887	-11.6212
	0.1	-11.0089	-10.4733	-4.44793	-6.24506	-9.35467	-6.68919	-6.76408	-5.45252	-6.50799	-6.00119	-6.80835	-5.67273	-6.39151	-8.69332	-5.22116	-7.1383	-6.52	-3.63213	-6.27177	-7.05227	-4.11835	-6.6888	-5.55814	-6.56522	-10.0501	-6.17928	-7.83515	-8.62727	-5.96338	-6.83981	-6.705	-2.17342	-6.42287	-4.29386	-4.89403	-4.36048	-4.59367	-3.94291	-8.88567	-3.46838	-3.45045	-9.79017	-5.16879	-5.98895	-12.0679	-5.52074	-7.53572	-11.6737
	0.11	-10.5115	-9.05731	-4.4754	-5.93378	-9.57745	-7.36211	-6.42883	-5.6698	-6.34319	-5.45951	-5.65326	-4.56036	-6.27677	-8.2264	-5.13326	-6.87952	-7.22557	-3.22319	-6.22904	-7.10476	-3.92426	-6.44073	-5.53373	-6.55301	-9.0532	-6.0801	-7.33314	-8.35261	-5.6872	-6.23647	-6.90054	-2.65682	-5.8882	-4.51725	-5.31884	-4.53626	-4.55827	-3.52787	-8.78497	-2.92272	-3.47852	-10.1405	-5.19809	-5.86944	-12.0419	-5.08739	-6.97053	-11.4637
	0.12	-10.5374	-8.88336	-4.43267	-5.84528	-9.1792	-7.33617	-6.20412	-5.30725	-6.06121	-5.0994	-5.80584	-5.11273	-5.57974	-8.26547	-4.78536	-6.88196	-6.66893	-3.25981	-5.8018	-6.51638	-4.01459	-6.26565	-5.15378	-5.66495	-9.46824	-5.59487	-6.59767	-7.62019	-5.06922	-6.15011	-6.79136	-2.63363	-6.46681	-4.15348	-5.73937	-4.35926	-4.64982	-3.84037	-9.53448	-2.95446	-3.35157	-10.6386	-5.06137	-5.78541	-12.088	-4.65526	-6.88753	-11.454
	0.13	-11.4926	-8.65143	-4.37316	-5.58283	-8.82519	-7.9221	-6.47087	-5.23523	-6.21746	-5.66702	-5.20923	-5.55066	-5.58219	-7.8077	-4.54	-5.42077	-6.30516	-3.82744	-5.85062	-6.48708	-4.04267	-6.24102	-5.37503	-6.68271	-10.2169	-6.03127	-6.04988	-8.09169	-5.54376	-6.21861	-6.66567	-2.26742	-6.56081	-5.05558	-5.77843	-4.26527	-5.16374	-3.38504	-8.93877	-2.9801	-3.78736	-9.11146	-5.01498	-5.86593	-11.9827	-4.7224	-6.75813	-11.3136
	0.14	-10.0385	-8.68957	-4.58831	-5.4455	-9.12732	-6.98369	-6.1788	-5.20716	-6.12469	-5.3649	-5.03833	-4.5741	-4.95108	-8.39181	-5.01608	-6.41565	-6.17454	-3.01079	-6.13016	-7.55764	-3.46284	-6.11769	-5.34452	-6.56064	-9.5781	-5.41176	-6.49238	-9.5016	-5.52698	-6.32463	-6.48234	-2.59457	-6.65602	-4.74552	-6.30639	-4.4557	-4.70842	-3.24222	-9.02117	-3.01428	-3.53101	-10.7875	-4.62192	-5.94798	-12.1032	-5.15086	-6.83504	-11.3734
	0.15	-10.5145	-8.33099	-3.91692	-5.4455	-8.71686	-7.05541	-5.98732	-4.52967	-6.11858	-5.34506	-5.38775	-4.75873	-5.8776	-8.21054	-4.24581	-5.78454	-6.96068	-3.26104	-5.65165	-6.62014	-3.65693	-6.01791	-5.42844	-6.55911	-9.67373	-5.0074	-6.54884	-9.11555	-5.0387	-6.36509	-6.58022	-2.45785	-7.01735	-4.94816	-6.25146	-4.41907	-5.31511	-3.50834	-9.10662	-2.88366	-3.36255	-9.91712	-5.33725	-5.94484	-11.8936	-4.60887	-6.42854	-11.3466
	0.16	-9.82178	-8.1723	-3.88641	-5.0152	-9.23871	-7.36668	-6.02484	-4.94593	-5.99407	-4.95597	-4.35473	-5.34619	-5.68473	-7.91452	-4.6462	-6.60242	-6.74827	-3.22441	-5.81889	-6.24172	-3.32856	-5.96822	-5.53067	-6.6232	-10.7195	-4.7831	-6.69532	-8.14814	-4.88764	-6.29366	-6.76536	-2.50057	-6.8672	-4.96403	-6.65368	-4.34217	-5.44816	-3.50712	-9.26531	-2.93127	-3.6067	-9.80482	-5.05649	-5.97115	-11.9138	-4.44652	-6.71174	-11.2574
	0.17	-10.1437	-8.40271	-3.833	-5.11438	-8.52307	-6.86009	-5.99002	-4.43445	-5.60833	-5.3237	-5.77685	-4.97235	-5.21964	-8.18246	-4.27999	-5.70276	-6.23924	-3.04741	-5.79081	-6.553	-3.41035	-5.87659	-5.7916	-6.54843	-9.808	-4.53133	-5.65467	-8.54182	-5.05701	-6.58572	-6.76242	-2.55306	-6.37404	-4.93351	-5.6759	-5.01844	-5.14665	-3.43631	-8.95281	-3.16687	-3.92652	-10.4201	-5.3641	-5.91663	-11.8896	-5.25584	-6.38704	-11.4381
	0.18	-10.4367	-8.14941	-3.78265	-5.97498	-9.06628	-7.40483	-5.76984	-4.16345	-5.37395	-5.12381	-4.16858	-4.9281	-5.39298	-8.2026	-4.17501	-5.77844	-6.52244	-3.36601	-6.06669	-6.22707	-3.61054	-5.88973	-5.46659	-6.92532	-9.808	-5.19966	-6.77772	-7.90095	-4.97614	-6.34	-6.43283	-2.51522	-6.7671	-4.60026	-6.47973	-5.03187	-5.09782	-3.9722	-9.75848	-3.0509	-3.67628	-10.9901	-5.14193	-6.04329	-11.9983	-4.07054	-6.29426	-11.2233
	0.19	-9.24499	-8.44849	-3.98559	-5.34784	-8.34607	-7.53148	-6.08744	-4.33679	-5.77068	-4.99869	-5.24585	-4.8396	-5.38565	-7.75827	-4.36056	-6.01648	-6.51268	-3.28301	-5.63822	-6.26369	-3.51166	-5.85303	-5.52915	-6.52554	-10.516	-4.61067	-6.42219	-8.35109	-4.96393	-6.50118	-6.53659	-2.69344	-7.25294	-4.89445	-6.25512	-4.93299	-5.56779	-3.54129	-9.20184	-3.0802	-3.3003	-9.42518	-5.22494	-5.96794	-11.9443	-4.1804	-6.40779	-11.4332
	0.2	-10.3436	-6.78833	-4.02221	-5.37836	-8.93811	-7.56505	-6.0897	-4.41614	-6.00506	-5.05667	-4.72247	-4.72516	-5.26969	-8.30758	-4.08712	-5.75647	-6.05491	-3.28057	-5.29887	-6.40041	-3.84003	-5.82602	-5.91214	-6.45688	-9.99721	-4.15749	-6.33522	-8.55555	-4.93036	-6.42251	-6.469	-2.64461	-6.64259	-5.00065	-5.6643	-4.03455	-4.94523	-3.98563	-9.36236	-3.24377	-3.6421	-10.1527	-4.65243	-5.86701	-11.8943	-3.57982	-6.39436	-11.4039
	0.21	-10.3482	-8.23334	-3.51562	-5.35242	-8.56579	-6.38097	-6.22578	-4.95325	-5.7951	-5.1055	-5.16345	-4.5039	-5.2648	-8.21847	-4.3215	-5.71619	-6.54686	-3.15117	-5.86649	-6.18801	-3.48969	-5.85269	-5.62833	-6.73154	-9.39703	-4.78615	-5.59974	-9.1949	-4.83576	-6.43155	-6.78028	-2.37972	-6.56569	-4.75651	-6.19225	-4.58265	-4.6779	-3.73294	-9.25005	-3.3634	-3.19776	-9.59119	-4.87948	-5.83594	-11.893	-4.63451	-6.28572	-11.3868
	0.22	-10.5481	-7.76031	-3.82537	-5.18	-9.13037	-6.70598	-5.97418	-4.95447	-5.41424	-4.90256	-5.95996	-4.70227	-4.72159	-7.90963	-4.29708	-5.50744	-6.67137	-3.47344	-5.65043	-6.22585	-3.59223	-5.86223	-5.66495	-6.59116	-9.91176	-5.01503	-6.61293	-8.76307	-4.69385	-6.29682	-6.6668	-2.49691	-6.70973	-4.81998	-6.21423	-4.75355	-5.10881	-3.96	-9.41241	-3.24865	-4.16212	-10.5726	-5.17367	-6.04043	-11.8263	-4.46117	-6.44563	-11.3685
	0.23	-9.4281	-8.4317	-3.90472	-5.71558	-9.1914	-6.94554	-5.93212	-4.25745	-5.35076	-4.57602	-4.76977	-4.61987	-5.06949	-7.71981	-4.55343	-5.34875	-5.88279	-3.4124	-5.37211	-6.23806	-3.61298	-5.73014	-5.46048	-6.62625	-9.50893	-4.89906	-6.93794	-8.60896	-5.11652	-6.28145	-6.38717	-2.48226	-6.58644	-4.46232	-6.39977	-4.28724	-5.07219	-3.7659	-9.12921	-3.19372	-3.72022	-10.4103	-5.21884	-5.9312	-11.8991	-4.40013	-6.19539	-11.3966
	0.24	-9.73175	-9.0451	-3.86962	-6.23133	-8.93963	-7.14085	-5.89211	-4.65784	-5.88299	-5.06888	-5.49456	-5.13257	-5.194	-7.83151	-4.2507	-5.85168	-6.43211	-3.33672	-5.88724	-6.50051	-3.69477	-6.00317	-5.59018	-6.56217	-9.99111	-4.56032	-6.93489	-8.57234	-5.72077	-6.6818	-6.35507	-2.51156	-6.44118	-4.40495	-5.81323	-4.45447	-5.10393	-3.83182	-9.37823	-3.46838	-3.47852	-10.0209	-5.54721	-5.97252	-11.9863	-4.59544	-6.37361	-11.0402
	0.25	-10.5161	-8.98407	-4.46777	-5.54621	-8.62378	-6.73192	-6.33178	-4.47718	-5.59002	-4.7988	-3.98242	-5.276	-5.04508	-7.90109	-3.89791	-5.66247	-6.49315	-3.3123	-5.92753	-5.9219	-3.22114	-5.84327	-5.63443	-6.51639	-9.90769	-4.26277	-7.19886	-8.90345	-5.83979	-6.63817	-6.93128	-2.5909	-6.43141	-4.76017	-6.07324	-4.68885	-4.48503	-4.06253	-9.01995	-2.74939	-3.59205	-10.5885	-5.25912	-6.00638	-11.9511	-3.91551	-6.45296	-11.1696
	0.26	-9.80347	-8.24402	-3.72771	-5.73694	-9.26465	-6.84026	-5.98433	-4.25012	-5.75726	-4.70572	-6.60846	-4.60004	-5.47476	-7.92245	-4.42648	-5.96399	-6.53831	-3.377	-5.93119	-6.18923	-4.12324	-5.97474	-5.8328	-6.16696	-9.513	-4.58016	-6.77314	-9.00111	-5.48273	-6.838	-6.23458	-2.46151	-6.55958	-4.77726	-5.97741	-4.82679	-5.32487	-3.85868	-9.29705	-3.40002	-3.20875	-10.0563	-5.58871	-5.98854	-11.9117	-4.37694	-6.17097	-11.1964
	0.27	-9.21905	-8.37677	-4.43267	-5.17694	-8.76568	-6.75786	-6.19862	-5.27063	-5.62298	-4.65995	-4.14264	-4.34827	-5.18057	-8.04574	-4.09567	-5.96155	-5.64354	-3.24883	-5.63578	-6.63967	-3.82172	-5.77358	-5.64206	-6.10898	-9.76935	-5.31716	-6.19483	-7.95741	-4.86627	-6.8848	-6.51398	-2.62386	-6.36793	-4.79923	-6.61462	-4.74012	-5.42863	-3.68167	-9.09319	-3.45251	-3.26124	-9.61317	-5.21151	-5.91155	-11.9346	-4.46361	-6.67879	-11.338
	0.28	-8.9917	-8.05939	-3.7384	-5.33869	-8.81299	-7.1378	-6.16742	-4.80677	-5.89275	-4.7927	-5.34198	-5.01202	-4.65933	-8.18246	-4.20553	-5.85901	-5.84129	-3.51494	-5.93363	-7.15114	-3.43232	-5.85106	-5.62986	-6.50723	-9.46824	-4.50539	-6.98219	-9.22389	-4.82508	-6.95871	-6.68353	-2.78011	-6.11403	-4.65885	-6.34606	-4.29212	-5.15764	-3.84647	-9.26897	-3.07897	-4.10108	-10.5922	-5.11752	-6.00658	-11.8679	-4.09496	-6.44075	-11.222
	0.29	-9.89654	-7.35748	-4.58373	-5.67743	-8.59326	-7.16985	-6.18166	-4.41858	-5.60345	-4.85526	-5.62579	-4.716	-5.34537	-8.15194	-4.24948	-5.97375	-6.71165	-3.45024	-5.8079	-6.50783	-3.42377	-5.91909	-5.5734	-6.47366	-9.82428	-4.51149	-6.88301	-7.89943	-5.52851	-6.44195	-6.48934	-2.50667	-6.15431	-4.71012	-5.81811	-4.24451	-4.98796	-3.84281	-9.56988	-2.87756	-3.38331	-10.0551	-5.17734	-5.85489	-11.9022	-4.79686	-6.71174	-10.8546
	0.3	-10.2338	-7.05841	-4.17938	-5.38446	-8.41015	-7.73137	-6.13079	-4.85071	-5.9782	-4.56076	-5.06884	-4.87164	-5.02921	-8.07443	-4.35201	-5.26819	-6.6555	-3.28057	-5.62968	-7.18044	-3.58613	-5.88165	-5.62528	-6.27835	-9.94228	-4.56185	-6.88606	-8.76918	-5.19281	-6.69378	-6.5072	-2.46517	-6.47169	-4.42082	-6.25207	-4.60828	-5.47624	-3.53885	-9.023	-3.19006	-3.49195	-11.2172	-5.49716	-6.0052	-11.8376	-4.48924	-6.7386	-10.9913
	0.31	-9.61883	-8.09296	-3.9688	-5.3219	-7.93255	-6.80058	-5.94519	-5.16199	-5.36297	-4.56839	-4.6889	-4.7038	-5.35758	-7.74606	-4.4631	-5.422	-6.35765	-3.33672	-5.62601	-6.15871	-3.6374	-5.72724	-5.45285	-5.99759	-9.69	-5.86647	-6.61293	-8.48689	-5.65515	-6.6515	-6.35688	-2.26742	-6.47902	-4.71622	-6.02624	-4.8512	-5.37492	-3.55838	-8.9461	-2.90319	-3.57374	-9.61072	-5.22128	-5.91899	-11.8824	-4.79076	-6.42366	-11.0499
	0.32	-10.5344	-7.67029	-4.42504	-5.77356	-9.03424	-7.04472	-6.18345	-4.74939	-6.13934	-4.70725	-4.9483	-4.48559	-5.17935	-8.02377	-4.34469	-6.00427	-5.96092	-3.05351	-5.34281	-6.56399	-3.73139	-5.90001	-5.47116	-6.29666	-9.32176	-4.47487	-6.98677	-9.38563	-5.12262	-6.31672	-6.1914	-2.1661	-6.63893	-4.73209	-5.92675	-4.2848	-5.44084	-3.70975	-9.01995	-2.97033	-4.26587	-8.76112	-5.09433	-5.83707	-11.9477	-4.38548	-6.3614	-11.139
	0.33	-10.0217	-8.656	-4.15343	-5.64692	-9.12274	-7.45061	-6.13168	-4.94715	-5.92083	-5.01242	-4.46765	-4.716	-6.10587	-8.39486	-4.54977	-6.63049	-6.37352	-3.18169	-6.02396	-6.85329	-3.61664	-6.09415	-5.62833	-6.13034	-9.79173	-4.47029	-6.90284	-8.67305	-5.80011	-6.86174	-6.33721	-2.29183	-6.43629	-4.60514	-6.17699	-5.22108	-5.36271	-3.99417	-8.9876	-3.26696	-3.5713	-10.1735	-4.98446	-5.98417	-11.9298	-4.74315	-6.50667	-10.9022
	0.34	-10.6976	-7.33307	-3.96117	-5.51569	-9.20972	-6.63884	-6.18728	-5.41345	-5.40569	-4.66757	-5.54034	-5.03949	-5.14029	-7.45431	-3.97726	-5.92981	-6.791	-3.24272	-5.65287	-6.20144	-3.43232	-5.87771	-5.46964	-6.50571	-9.58624	-4.5771	-6.90895	-9.50007	-5.04175	-6.41934	-6.62973	-2.55184	-6.45338	-4.67472	-6.05675	-4.71937	-4.69499	-4.04544	-9.74017	-2.9154	-3.32349	-9.03333	-5.34701	-5.91402	-11.8328	-4.50755	-6.96809	-10.7594
	0.35	-9.25873	-8.40729	-4.06646	-5.38294	-9.20209	-6.76244	-6.02994	-5.16077	-5.81951	-5.07804	-5.05359	-5.32483	-4.88883	-7.89865	-4.20553	-5.422	-5.99876	-3.32329	-5.83964	-5.94997	-3.68867	-5.84581	-5.46048	-6.18832	-9.77138	-4.58321	-7.03102	-8.43959	-5.32404	-6.38612	-6.66974	-2.38705	-6.53761	-4.77116	-5.84618	-4.49232	-5.05021	-3.52298	-9.52227	-3.21325	-3.45289	-9.64612	-5.63266	-5.90136	-11.8898	-4.88109	-6.51277	-10.8241
	0.36	-10.7053	-8.125	-4.42046	-5.27918	-9.08612	-7.20647	-6.13325	-4.6908	-5.6889	-4.69199	-5.09173	-4.91894	-5.48209	-8.02316	-4.42281	-5.60876	-5.81444	-2.97295	-5.32084	-5.75954	-3.23701	-5.84189	-5.59934	-6.43552	-9.75511	-4.79836	-6.90132	-8.57997	-5.26148	-6.49982	-6.61571	-2.45296	-6.17384	-4.47575	-5.79247	-4.58021	-5.19792	-3.82694	-8.98821	-3.47692	-3.18433	-9.6095	-5.24447	-5.87858	-11.954	-4.66014	-6.76301	-11.2916
	0.37	-10.6869	-7.47345	-4.14123	-5.54773	-9.44317	-6.97301	-6.0765	-5.02405	-5.68035	-4.89493	-4.40509	-4.73279	-5.3942	-7.81137	-4.22018	-5.95422	-5.89256	-3.2769	-5.76517	-6.16115	-3.31147	-5.85078	-5.41623	-5.99301	-9.48248	-5.00588	-6.76246	-8.67	-5.31488	-6.39606	-6.32636	-2.5555	-6.44728	-4.64665	-6.15258	-4.48011	-4.26652	-3.73905	-8.71783	-3.28771	-3.44312	-10.6508	-5.31527	-5.86046	-11.9192	-4.30492	-6.55672	-11.15
	0.38	-10.1208	-9.02679	-4.35485	-5.18305	-9.23871	-7.33006	-6.13821	-4.68836	-5.9782	-4.44785	-5.38012	-5.08679	-5.44547	-7.54831	-4.03219	-5.51477	-6.00853	-3.70415	-5.87138	-6.46633	-3.61176	-5.96079	-5.54441	-6.41568	-9.61473	-4.32991	-6.93794	-9.07588	-5.08753	-6.39742	-6.5384	-2.66292	-6.60719	-4.91886	-6.03661	-4.50941	-5.51164	-3.91727	-9.56866	-3.52087	-3.31617	-8.56336	-5.40927	-5.92782	-11.8731	-4.77	-6.37971	-11.0072
	0.39	-10.3604	-9.24347	-3.90014	-5.17084	-9.00067	-6.88603	-6.00302	-4.33924	-6.01849	-4.09079	-5.95233	-4.99371	-5.54556	-7.92062	-4.11764	-5.76745	-7.15965	-3.48076	-5.73832	-6.12209	-3.93525	-5.98793	-5.50168	-6.02963	-9.38076	-4.91127	-6.8296	-8.96449	-5.55902	-6.22064	-6.3397	-2.57748	-6.44118	-4.19743	-6.44738	-4.45081	-5.55681	-3.57425	-8.86431	-3.09851	-3.63721	-9.69129	-5.27133	-5.88308	-11.909	-4.56249	-6.78499	-10.9327
	0.4	-9.58069	-8.77502	-4.34112	-5.48517	-8.45746	-6.7487	-6.08734	-4.52844	-5.88177	-4.67978	-4.40509	-5.02118	-5.80069	-7.87301	-4.17745	-6.07873	-6.98021	-3.15361	-5.52225	-6.76784	-3.39326	-5.89232	-5.60849	-6.3577	-9.45603	-4.66103	-6.22535	-8.96602	-5.0799	-6.54074	-6.2972	-2.6617	-6.46681	-4.48795	-5.63988	-4.66566	-4.75236	-3.90873	-9.04131	-3.55383	-3.63355	-9.24329	-5.41659	-5.84115	-11.8121	-4.15721	-6.14168	-10.7106
	0.41	-10.2948	-8.28674	-4.03899	-5.58893	-9.31042	-7.25987	-6.04619	-4.79212	-6.42254	-5.38931	-5.1665	-4.95557	-4.07828	-7.86691	-4.78414	-5.95178	-6.18431	-3.35137	-5.65287	-6.65676	-3.77656	-5.99309	-5.45743	-5.89383	-9.20579	-4.22768	-6.63124	-9.81288	-4.81592	-6.35582	-6.14054	-2.36385	-6.04079	-4.20475	-5.59167	-4.44837	-4.52531	-4.18338	-8.95953	-3.10583	-3.38819	-9.0785	-5.04184	-5.6892	-11.9646	-4.55638	-6.78621	-10.9095
	0.42	-10.0476	-7.77557	-4.04968	-5.1037	-9.39435	-7.72069	-6.30525	-4.28186	-5.53509	-4.27542	-4.79266	-4.61529	-4.11246	-8.20748	-4.2568	-6.41809	-6.50535	-3.52837	-5.8018	-6.06838	-3.84858	-5.84021	-5.17972	-6.17917	-9.73883	-4.9128	-6.1338	-8.62117	-5.11499	-6.42816	-6.14528	-2.05135	-5.74293	-4.77604	-6.31432	-4.63636	-5.09904	-3.75248	-9.01263	-3.01428	-4.09864	-10.0148	-5.33969	-5.82412	-11.9714	-4.71751	-6.55672	-10.8693
	0.43	-9.81262	-8.28674	-4.24651	-5.84375	-9.0495	-7.52385	-5.9535	-4.04871	-6.1137	-4.8812	-4.341	-4.43371	-5.61881	-8.0317	-4.39108	-5.91028	-5.76317	-2.99858	-5.72611	-5.97194	-3.51166	-5.83134	-5.45438	-6.34702	-9.69814	-4.85939	-7.26448	-8.61354	-4.94562	-6.58889	-6.60961	-2.29671	-6.16408	-4.56364	-6.14831	-4.59608	-5.2028	-3.69876	-8.78436	-2.92761	-3.42115	-9.18592	-4.75253	-5.81538	-11.8344	-4.57835	-6.35652	-11.0133
	0.44	-10.2658	-8.79181	-4.3991	-5.73542	-9.0022	-6.76854	-6.00141	-4.66516	-5.57781	-4.71793	-6.33227	-4.39252	-6.00089	-8.0787	-4.2861	-5.68079	-5.53245	-3.40264	-5.9434	-6.44314	-3.55683	-5.97976	-5.66037	-6.3226	-9.72052	-4.96926	-6.59309	-8.87752	-4.68012	-6.52876	-6.38332	-2.39681	-6.03346	-4.36832	-6.04333	-4.57166	-5.226	-4.10404	-8.74529	-3.03015	-3.44312	-9.38734	-5.60702	-5.84248	-11.8948	-3.94359	-6.22713	-10.8693
	0.45	-10.191	-8.40118	-3.93523	-5.29139	-9.29669	-6.36571	-6.26386	-5.22303	-6.08929	-4.85068	-5.57696	-4.91589	-5.29898	-8.05673	-4.43502	-5.84314	-6.18797	-3.07915	-5.85917	-5.95608	-3.96332	-5.95621	-5.50779	-6.38669	-10.4123	-4.99977	-6.17195	-8.60896	-5.58039	-6.05381	-6.29019	-2.61043	-6.17262	-4.70524	-5.66613	-4.51429	-5.03435	-3.83915	-8.52374	-3.43054	-3.4834	-9.63636	-5.03695	-5.84119	-11.7461	-4.19994	-6.05623	-11.0646
	0.46	-10.1178	-8.63312	-4.10613	-5.5401	-8.89081	-6.77464	-6.13772	-4.69812	-5.96111	-4.85526	-5.74786	-5.2348	-5.26724	-8.35153	-4.27511	-5.39758	-6.1074	-3.49297	-5.73344	-6.99123	-4.0329	-6.01652	-5.37046	-5.94266	-9.88125	-5.50179	-6.87995	-8.44417	-5.43543	-6.45484	-6.14506	-2.51156	-5.83205	-4.36344	-5.69115	-4.7389	-4.74138	-4.11014	-9.03216	-3.26574	-4.06812	-9.20301	-5.68393	-5.87129	-11.8274	-4.05956	-7.15608	-11.1146
	0.47	-10.1956	-9.2633	-3.96117	-5.10675	-8.7138	-7.85191	-6.1255	-5.37561	-5.52898	-4.75608	-4.49969	-4.18652	-5.83365	-8.15499	-4.03097	-5.61975	-6.75194	-3.55156	-5.908	-6.67751	-3.89863	-5.99961	-5.69394	-5.94266	-9.31769	-5.06233	-6.45118	-9.00111	-5.01734	-6.20618	-6.35869	-2.39315	-6.31666	-4.70158	-5.74853	-4.99647	-5.1735	-3.64505	-9.08526	-3.13391	-3.58106	-8.61341	-5.15902	-5.79042	-11.8263	-3.84715	-6.54085	-10.6166
	0.48	-10.0842	-8.302	-4.0451	-5.29902	-9.1441	-7.00505	-6.23672	-4.76282	-6.09905	-5.07956	-5.33282	-4.76483	-4.16007	-7.83883	-4.31051	-5.69787	-6.19529	-3.12188	-5.75175	-6.10256	-3.79609	-5.86334	-5.77176	-6.11966	-8.98403	-4.21395	-6.36573	-8.34041	-5.263	-6.19058	-6.25425	-2.51766	-6.20802	-4.56608	-5.6112	-4.93299	-4.9904	-3.75858	-8.97296	-3.10705	-3.37476	-9.1554	-5.24325	-5.71151	-11.8751	-4.26219	-6.50178	-10.9755
	0.49	-10.4169	-8.38592	-3.75976	-5.4867	-8.81146	-7.25835	-6.31267	-4.09265	-5.98553	-5.11466	-5.62579	-4.60156	-4.24674	-8.01034	-4.27145	-6.04944	-6.75071	-3.28423	-5.51859	-5.90725	-3.86078	-5.89293	-5.62223	-6.31345	-10.046	-5.42244	-7.00202	-8.96754	-5.33014	-6.52039	-6.18417	-2.59457	-6.38136	-4.24747	-5.57031	-4.57532	-5.42619	-3.81473	-9.40203	-3.14978	-3.45777	-9.97449	-5.37387	-5.9703	-11.8096	-4.36107	-6.52986	-10.8107
	0.5	-10.1041	-8.82996	-4.15038	-5.71711	-9.15021	-7.06914	-6.15194	-4.98133	-5.4948	-4.83237	-4.63397	-5.34924	-6.18399	-8.39059	-4.69991	-5.55872	-6.29051	-3.4356	-5.57963	-5.94143	-3.5788	-6.00589	-5.29874	-5.89536	-9.31972	-4.77089	-6.6999	-9.3246	-4.54889	-6.18854	-6.13941	-2.41146	-6.14943	-4.43302	-6.27831	-4.49476	-5.23454	-4.08451	-9.25433	-3.19983	-3.18921	-8.41199	-5.34701	-5.7464	-11.7044	-4.48802	-6.70564	-10.8558
	0.51	-10.4382	-8.07007	-3.88641	-5.25324	-9.55151	-7.81377	-6.12119	-4.15125	-5.87078	-4.35629	-4.90405	-4.97693	-4.14298	-8.22701	-4.62423	-6.3302	-6.4785	-3.43315	-5.76884	-6.40774	-3.59101	-5.92368	-5.46811	-6.16544	-9.19969	-5.59029	-6.46797	-8.34803	-5.22791	-6.41595	-6.37881	-2.46761	-6.14577	-4.80045	-5.9884	-5.02576	-4.75358	-4.15165	-9.02056	-3.21814	-3.9607	-8.8783	-4.97592	-5.84043	-11.7404	-4.34642	-6.51643	-10.7606
	0.52	-9.69208	-9.37622	-3.63769	-5.6225	-9.28296	-6.67241	-5.96634	-5.27063	-5.7365	-5.00632	-4.96661	-4.52069	-5.27213	-7.81442	-4.09933	-5.92615	-6.61156	-3.15972	-5.58695	-6.56521	-3.33466	-5.91053	-5.49558	-6.25089	-9.03286	-4.99672	-7.53303	-8.43043	-4.90442	-6.14469	-6.04153	-2.32235	-5.77345	-4.2841	-5.88342	-4.78773	-5.09904	-3.80375	-9.41973	-2.84094	-3.32838	-8.90028	-5.77304	-5.76411	-11.7734	-4.19505	-6.3199	-10.6227
	0.53	-10.2872	-8.01514	-3.95507	-5.55231	-8.42236	-7.68102	-6.01697	-5.75037	-5.31536	-5.39847	-5.1726	-4.74652	-5.58829	-8.35458	-4.34347	-5.6344	-6.36619	-3.06816	-5.35868	-7.13527	-4.00117	-6.00779	-5.1843	-5.60696	-8.68496	-5.55824	-6.64192	-8.45637	-5.61853	-6.45167	-6.60056	-2.47249	-6.25197	-4.62833	-5.90111	-5.20032	-5.0905	-4.12967	-9.16155	-2.89343	-3.56885	-9.68763	-4.74521	-5.83498	-11.7027	-4.77	-6.3614	-10.7081
	0.54	-10.0735	-8.74298	-3.95507	-4.95722	-8.73059	-7.70238	-6.15531	-5.24134	-5.8305	-4.62027	-4.82318	-4.80145	-5.07681	-8.11288	-4.36178	-5.54285	-6.50047	-3.32939	-5.814	-5.82546	-3.96943	-5.91271	-5.47727	-6.25241	-9.86294	-5.09895	-6.47102	-8.52351	-4.88611	-6.22449	-6.26713	-2.56527	-6.01637	-4.18888	-6.11474	-4.58509	-5.28825	-3.68534	-9.22442	-3.01428	-3.20142	-8.93812	-5.51181	-5.78085	-11.7671	-4.38915	-6.52986	-10.4982
	0.55	-9.53186	-9.25568	-3.81774	-5.80256	-8.92438	-6.39623	-6.09653	-4.81531	-5.85979	-4.79575	-4.81707	-5.03796	-5.22208	-7.65878	-4.23361	-5.68445	-5.50926	-3.5894	-5.84696	-5.81569	-3.84492	-5.836	-5.67563	-6.1456	-9.82835	-4.90517	-6.23451	-8.67457	-5.62006	-6.46456	-6.05939	-2.45296	-6.02858	-4.22672	-5.96886	-4.65711	-5.11735	-3.90751	-8.6397	-3.21814	-3.79468	-9.73524	-5.17489	-5.83474	-11.8335	-4.90672	-6.73616	-10.901
	0.56	-10.3238	-8.65448	-3.89404	-5.54773	-8.86487	-7.27513	-6.00768	-4.96057	-6.04168	-5.79367	-5.06274	-4.88843	-4.63126	-8.12326	-4.21285	-6.28381	-7.0388	-3.09746	-5.88236	-6.15627	-3.90717	-6.03086	-5.50473	-6.08762	-9.26479	-4.99062	-6.9181	-8.54335	-5.29199	-6.61579	-5.96263	-2.25155	-5.98952	-4.30973	-5.86327	-4.23597	-5.02946	-3.99906	-9.24029	-3.25476	-3.14283	-9.88782	-5.75473	-5.81612	-11.6909	-4.67235	-6.66047	-10.7362
	0.57	-10.101	-9.59137	-4.3457	-5.55994	-8.93658	-7.43077	-5.97603	-4.61389	-6.02337	-4.43564	-4.66449	-4.81976	-3.94644	-8.12875	-4.1445	-6.12268	-6.41136	-3.53081	-5.72611	-6.54445	-3.5788	-5.93488	-5.23771	-6.25546	-9.37669	-4.99977	-6.47865	-7.96657	-4.43445	-6.41008	-5.94455	-2.55062	-6.21168	-4.62345	-6.04333	-4.48499	-4.55949	-3.90751	-8.75262	-3.31213	-3.30518	-9.72547	-4.73422	-5.68165	-11.7886	-4.34276	-6.29915	-10.9193
	0.58	-9.88129	-9.1336	-3.73382	-5.18	-9.29364	-7.12254	-6.02146	-4.63831	-5.83294	-5.18332	-5.70208	-5.09289	-5.63834	-7.87484	-4.16158	-6.49255	-5.4409	-3.19756	-5.63334	-6.02443	-3.40912	-5.93755	-5.33384	-6.15781	-9.47231	-4.94484	-6.7884	-8.80885	-6.08087	-6.18425	-6.0517	-1.96712	-5.90529	-4.49039	-5.82299	-5.15027	-4.86833	-3.48636	-8.99676	-3.10949	-3.95948	-8.79529	-5.82919	-5.81923	-11.6898	-4.15233	-6.27962	-10.7582
	0.59	-9.97131	-8.51562	-4.24194	-5.35242	-8.54291	-7.24461	-5.77867	-4.98377	-5.85369	-5.05515	-5.02765	-4.77399	-4.37491	-8.07626	-4.14694	-5.91516	-6.24779	-3.40508	-5.637	-6.45046	-3.7204	-5.87218	-5.61612	-6.36838	-10.0827	-4.96315	-7.30415	-8.97212	-5.14246	-6.32327	-6.01463	-2.19418	-6.27272	-4.38419	-6.05126	-4.49842	-5.24919	-4.17362	-8.8814	-3.17663	-3.65796	-8.13367	-5.28598	-5.84506	-11.7998	-4.19261	-6.94368	-10.5421
	0.6	-10.1773	-9.19311	-4.34264	-5.4043	-8.54443	-7.30107	-6.18647	-5.26941	-5.51189	-4.71945	-5.49456	-4.40167	-3.55704	-7.69723	-4.55587	-5.79065	-6.25999	-3.16948	-5.68461	-6.24904	-3.79243	-5.87155	-5.47422	-5.82669	-10.0196	-4.88533	-6.97303	-8.9767	-5.66126	-6.26224	-6.37067	-2.16	-5.94069	-4.4025	-5.63134	-3.92957	-5.29191	-3.85257	-8.84783	-3.13757	-3.48951	-8.14466	-4.92465	-5.72393	-11.7384	-4.39891	-7.06209	-10.724
	0.61	-10.1407	-8.9505	-4.23888	-5.69574	-8.83282	-6.6953	-6.06123	-5.37073	-5.6181	-4.98801	-4.31811	-4.78161	-4.78629	-7.96884	-4.29098	-5.58557	-4.92699	-3.30376	-5.55521	-5.99392	-3.91327	-5.81031	-5.63443	-6.01437	-9.06744	-5.32936	-6.87995	-8.01997	-5.42169	-6.35515	-6.06526	-2.53231	-5.81496	-4.54655	-5.64111	-4.42029	-5.24064	-3.77201	-8.71539	-2.97644	-3.82032	-9.0785	-5.28231	-5.74421	-11.7562	-4.89696	-6.37483	-10.8046
	0.62	-9.98657	-8.04871	-4.20379	-6.00855	-8.62378	-7.54521	-5.79109	-4.63831	-5.81341	-4.69962	-4.83538	-4.77093	-5.49918	-7.69479	-4.50338	-5.49036	-6.63841	-3.3062	-5.48075	-6.29177	-3.65327	-5.88207	-5.35672	-5.93655	-9.97076	-4.78615	-7.47657	-8.36177	-5.44001	-6.48264	-6.14325	-2.40169	-6.39967	-4.81632	-5.84313	-4.51063	-4.74382	-4.07474	-8.29058	-3.51965	-3.25147	-8.90028	-5.15292	-5.80282	-11.7892	-4.81395	-6.36873	-10.7289
	0.63	-9.776	-8.7323	-3.76281	-5.70948	-9.47674	-7.38957	-6.04811	-5.06433	-5.91106	-5.08261	-5.19244	-4.72363	-5.913	-8.05246	-4.01754	-5.64661	-6.08055	-3.14629	-5.51615	-6.05495	-3.24189	-5.93041	-5.38724	-5.73361	-9.25055	-5.65437	-6.6999	-8.90345	-5.3805	-6.04613	-5.82723	-2.35775	-6.19215	-4.86881	-6.1538	-4.41785	-4.4301	-3.27152	-8.97234	-3.09851	-3.52735	-10.5726	-5.06137	-5.80034	-11.6744	-4.84203	-6.26008	-10.5043
	0.64	-10.1514	-8.75976	-4.23583	-4.90076	-9.10596	-7.07982	-6.21946	-3.87171	-6.09295	-4.87662	-4.40814	-5.30957	-4.31265	-7.97067	-4.67184	-5.95911	-6.02928	-3.11821	-5.67606	-6.27224	-3.72651	-5.84517	-5.37961	-5.94724	-9.25258	-5.16304	-6.20704	-9.90596	-4.99597	-6.3027	-6.23684	-2.3077	-5.80885	-4.75407	-5.60143	-4.60218	-5.21867	-4.12601	-8.68243	-3.27185	-3.46631	-8.28992	-5.08944	-5.74333	-11.6097	-4.70653	-6.92781	-10.6923
	0.65	-9.23126	-8.91846	-4.06036	-5.72168	-8.40558	-7.4796	-6.08088	-4.87635	-5.99407	-5.44882	-5.76007	-4.85486	-4.08194	-7.79245	-4.50216	-5.91394	-6.41624	-3.25371	-5.45634	-6.60427	-3.92426	-5.94178	-5.09732	-5.91367	-8.80092	-4.16817	-6.58699	-8.46553	-5.06616	-6.11372	-5.99677	-3.08407	-6.19337	-4.51237	-5.46227	-4.43983	-5.01603	-4.12357	-9.33428	-2.81774	-3.18067	-9.57776	-5.15902	-5.67192	-11.6789	-4.38914	-6.6971	-10.6727
	0.66	-10.1651	-8.26233	-4.15343	-6.03754	-8.8374	-7.37126	-5.9631	-4.46741	-5.67913	-5.18027	-5.43353	-5.32635	-4.40177	-8.15194	-4.32882	-5.83215	-5.94749	-3.34892	-6.20585	-6.32961	-3.59467	-5.95324	-5.53525	-6.6232	-8.67072	-5.20577	-6.86622	-8.72645	-5.67652	-6.39357	-6.11522	-2.42	-5.61842	-4.5612	-5.66369	-4.76209	-5.08806	-3.54984	-8.76299	-2.83605	-3.17945	-8.85145	-5.6058	-5.74819	-11.6961	-4.02904	-6.35164	-10.6801
	0.67	-9.90723	-8.90472	-4.15801	-5.21662	-8.85876	-7.26903	-6.07341	-5.33167	-5.99651	-5.14365	-5.6502	-5.53998	-5.59439	-7.91391	-4.42648	-5.4928	-5.89134	-3.26226	-5.78471	-6.6592	-3.84736	-6.04392	-5.24991	-5.59171	-9.27496	-4.75868	-7.34992	-7.64155	-4.35358	-6.25704	-5.82135	-2.5079	-6.02492	-4.82243	-5.51903	-4.33484	-4.60832	-4.17484	-8.40533	-3.46472	-3.26246	-8.88196	-5.40805	-5.60541	-11.6753	-4.1743	-6.27595	-10.4322
	0.68	-9.95605	-8.43933	-4.09393	-5.41956	-8.94269	-7.46434	-6.18191	-4.24402	-6.17229	-5.30387	-5.64715	-4.41998	-5.8544	-7.67282	-4.57052	-5.45129	-6.33568	-3.21953	-5.33793	-5.91701	-3.59467	-5.91614	-5.38877	-5.76413	-9.12238	-4.748	-6.74568	-9.25441	-5.85047	-6.39584	-5.91697	-2.17586	-5.35963	-4.51359	-5.88403	-4.71204	-4.42643	-3.8599	-8.74041	-3.06066	-3.6897	-8.54749	-5.1517	-5.68134	-11.6536	-4.29637	-6.49568	-10.8192
	0.69	-10.2078	-8.45611	-4.32739	-4.94959	-9.02966	-7.36516	-5.87492	-4.74451	-5.62542	-5.08109	-5.63647	-4.44592	-5.00113	-8.1556	-4.22628	-6.25329	-6.26732	-3.33794	-5.56742	-5.95974	-3.74238	-5.91691	-5.11563	-5.99301	-9.47028	-5.22713	-6.79298	-8.72188	-5.15314	-6.40104	-5.94432	-2.33456	-5.36085	-4.16325	-6.0061	-4.61683	-5.09782	-3.84281	-8.42059	-2.91418	-3.90333	-9.12	-5.13339	-5.70158	-11.6834	-4.43797	-6.39192	-10.619
	0.7	-10.1819	-8.83606	-4.02831	-5.40125	-8.3064	-6.88603	-5.97325	-4.67249	-6.0136	-4.98038	-4.66296	-5.18902	-4.73868	-8.00607	-4.35446	-5.65637	-6.04881	-3.54058	-5.44291	-5.82546	-3.85102	-5.8379	-5.52762	-6.1807	-8.82941	-4.77699	-5.99189	-8.98433	-5.18518	-6.08863	-6.0456	-2.58846	-6.04811	-4.17423	-5.41222	-4.61439	-4.96965	-3.74027	-8.72881	-3.3927	-3.37842	-8.11903	-5.41781	-5.62831	-11.7112	-4.44774	-6.80452	-10.1551
	0.71	-10.4153	-9.11987	-4.08477	-5.57062	-8.70465	-7.46739	-5.94476	-4.67981	-6.02337	-5.46256	-3.781	-4.99066	-5.10123	-8.06466	-3.82955	-6.13977	-5.58372	-3.36724	-5.7139	-6.43825	-3.96332	-5.92602	-5.56119	-5.89688	-9.2241	-4.63661	-6.24061	-8.15272	-5.34693	-6.21296	-5.92556	-2.41268	-6.20924	-4.52213	-5.47997	-4.66199	-5.32853	-4.06131	-8.92413	-3.14611	-3.54688	-9.05897	-4.97592	-5.69169	-11.6796	-4.01317	-6.29426	-10.7411
	0.72	-10.4535	-8.10516	-4.10003	-5.21967	-9.31805	-7.21104	-6.10141	-5.00818	-6.12713	-5.41678	-4.28607	-4.83807	-3.67179	-7.99203	-4.3215	-6.17761	-5.46532	-3.13042	-5.41849	-6.45046	-3.55195	-5.82689	-5.62375	-6.00369	-9.61676	-4.96315	-7.3896	-8.58149	-4.97766	-6.27264	-5.87673	-2.07088	-6.48146	-4.30851	-5.76745	-4.64246	-4.71574	-3.51444	-8.64886	-3.51233	-3.69825	-8.48401	-5.40561	-5.74074	-11.6165	-4.38304	-6.29548	-10.7167
	0.73	-10.1331	-8.40729	-4.50591	-5.54926	-9.07391	-7.18358	-6.08174	-5.12171	-5.81219	-5.04904	-4.70569	-4.96167	-3.98184	-8.12143	-4.27145	-5.02771	-5.73997	-3.3709	-5.49174	-6.77761	-3.86567	-5.86826	-5.32621	-6.01437	-8.83551	-5.42854	-6.12159	-7.80482	-4.70148	-6.17317	-6.01621	-2.26864	-6.16652	-4.4965	-5.55505	-4.25062	-5.13322	-3.79154	-9.08404	-2.77014	-3.47242	-9.1493	-5.09677	-5.6027	-11.6323	-4.54662	-6.17341	-10.3639
	0.74	-9.96521	-8.62091	-4.21905	-5.29902	-9.16089	-7.00658	-6.12808	-5.16687	-5.46185	-4.31052	-4.08465	-4.90979	-3.1127	-7.98349	-4.35568	-5.41833	-6.33201	-3.31719	-5.54911	-6.24782	-3.66059	-5.72906	-5.44675	-6.11356	-9.27293	-5.54604	-5.88203	-9.23457	-4.73047	-6.21703	-5.98095	-2.70809	-5.94557	-4.51725	-5.87365	-4.61805	-4.66936	-3.67801	-9.16644	-3.14245	-3.29297	-8.29969	-5.18954	-5.69169	-11.6145	-4.31224	-6.56404	-10.3321
	0.75	-10.0262	-9.36401	-3.95049	-5.57978	-8.33386	-7.30412	-6.04172	-5.50623	-6.06731	-4.78049	-4.91168	-5.12036	-3.57901	-7.96762	-4.24948	-5.6698	-5.74486	-3.33061	-5.83598	-6.29055	-3.61054	-5.86975	-5.16141	-5.92435	-9.60659	-5.17983	-6.24214	-8.00776	-4.62976	-6.13203	-5.64593	-2.38583	-5.77711	-4.47453	-5.45678	-4.77796	-5.24431	-4.03324	-8.73065	-3.22668	-3.90333	-8.06898	-5.29574	-5.61452	-11.7881	-3.83861	-6.72395	-10.4872
	0.76	-9.65393	-8.93829	-4.45708	-5.54926	-8.83282	-6.51067	-5.77271	-4.63343	-5.67547	-5.06735	-4.62481	-4.95862	-4.13687	-7.96701	-4.27145	-5.43054	-5.96702	-3.64311	-5.73588	-6.49318	-4.3686	-5.84229	-5.40403	-6.1929	-9.05931	-5.21492	-7.1302	-7.92994	-5.48426	-5.89399	-6.06346	-2.1954	-6.38258	-4.5319	-5.91943	-4.48377	-5.24553	-3.75126	-8.88323	-3.1571	-2.9585	-9.49476	-5.71689	-5.76635	-11.6441	-4.30614	-6.19295	-10.4786
	0.77	-10.2078	-7.33917	-4.00848	-5.40125	-9.20666	-7.2263	-5.81045	-4.88367	-6.09661	-5.49765	-5.19854	-5.09289	-3.4838	-8.23739	-3.81246	-5.71497	-5.37987	-3.18169	-5.7139	-5.67043	-3.47382	-5.74466	-5.4849	-6.22037	-8.79075	-5.49263	-7.17292	-7.86738	-5.03717	-6.12841	-5.81208	-2.33456	-6.09328	-4.53068	-5.3109	-4.54237	-5.14299	-3.48636	-8.95281	-3.00573	-3.38209	-8.19593	-5.15292	-5.62558	-11.6335	-4.02904	-6.74959	-10.6764
	0.78	-9.44336	-8.97797	-3.75823	-5.51111	-9.02203	-7.31938	-5.93636	-4.45154	-5.55706	-4.80185	-4.91168	-4.7923	-3.89151	-8.00118	-4.39352	-5.62097	-6.48582	-3.16704	-5.55765	-6.64333	-3.94135	-5.81835	-5.26212	-5.74887	-10.0216	-4.87007	-5.998	-9.28798	-5.28437	-6.21228	-5.89279	-2.25765	-5.23024	-4.35978	-5.37438	-4.60584	-4.74748	-3.82328	-8.94	-3.26452	-3.50416	-9.28846	-5.24814	-5.67724	-11.6305	-3.90575	-6.70686	-10.5629
	0.79	-9.83398	-7.51465	-4.43725	-5.357	-8.86944	-7.0432	-5.7858	-4.29773	-5.75726	-4.69657	-4.80334	-4.68548	-4.81925	-8.20748	-4.71212	-5.43787	-5.83763	-3.07915	-5.52836	-6.1111	-3.61664	-5.73482	-5.45591	-6.03269	-9.18748	-4.43215	-7.67188	-8.96602	-5.12567	-6.21476	-5.93257	-2.33211	-5.58913	-4.69669	-5.64782	-4.36536	-5.05754	-3.92704	-8.80511	-3.02771	-3.52613	-8.75135	-4.76962	-5.69118	-11.6342	-4.48192	-7.08406	-10.4786
	0.8	-9.38538	-8.94897	-4.13818	-5.51569	-8.90912	-7.87022	-6.19473	-5.11072	-5.8305	-4.63248	-4.70721	-4.59241	-3.65592	-8.28317	-4.29952	-5.61365	-6.34178	-3.28423	-5.76517	-6.00368	-3.60566	-5.8423	-5.22245	-5.56882	-9.70628	-4.70833	-6.41609	-8.22139	-5.30878	-6.24506	-5.87266	-2.43465	-5.99562	-4.42326	-5.73388	-4.36902	-4.62785	-3.99417	-9.29156	-3.03991	-3.44922	-9.08094	-5.4703	-5.67525	-11.5781	-4.54051	-6.48836	-10.4799
[truncated: 14 more columns]
