# Supplementary material for: Kv3.3 subunits control presynaptic action potential waveform and neurotransmitter release at a central excitatory synapse
Source: eLife. 2022 May 5;11:e75219. doi: 10.7554/eLife.75219 (PMC9110028; doi:10.7554/eLife.75219)
Supplement: Figure 5—source data 1. [file elife-75219-fig5-data1.xlsx]

## Sheet: Figure 5
Table 1
Figure 5D	Is recovery from short term depression enhanced in Kv3.3 KOs due increases in presynaptic calcium?
		Normalised EPSC amplitudes during recovery stimuli following a 1s conditioning train
	Time (s)	WT (n=11)											Average	Kv3.3 KO (n=10)										Average	Kv3.1 KO (n=8)								Average
	0	0.369608	0.465769	0.413629	0.346517	0.382288	0.335759	0.669495	0.553143	0.329465	0.384205	0.500613	0.431863	0.433995	0.38708	0.448886	0.287603	0.347917	0.26965	0.269233	0.136162	0.249506	0.257266	0.30873	0.42006	0.395913	0.646303	0.374929	0.435062	0.294324	0.475278	0.316047	0.41974
	0.05	0.436163	0.496195	0.460633	0.380425	0.575609	0.402896	0.727191	0.615241	0.376058	0.450329	0.532741	0.495771	0.531206	0.510352	0.590237	0.353174	0.382903	0.403513	0.325236	0.20415	0.368	0.368995	0.403777	0.48854	0.464169	0.666637	0.441241	0.428239	0.369165	0.514047	0.342631	0.464334
	0.1	0.539107	0.511191	0.570908	0.465827	0.646178	0.533398	0.729626	0.614433	0.468037	0.458656	0.592015	0.557216	0.572156	0.580185	0.619902	0.359713	0.428388	0.425243	0.317101	0.253131	0.444577	0.41656	0.441696	0.494552	0.487506	0.718389	0.504809	0.485102	0.384524	0.618769	0.379969	0.509203
	0.5	0.628131	0.666854	0.689605	0.57738	0.681212	0.662319	0.772192	0.756917	0.537821	0.613209	0.720761	0.664218	0.746406	0.696371	0.728704	0.487389	0.507587	0.596076	0.494193	0.472671	0.610315	0.604709	0.594442	0.661138	0.602453	0.787462	0.668276	0.656215	0.616295	0.712337	0.532607	0.654598
	1	0.759369	0.768974	0.795908	0.808569	0.857519	0.791284	0.882839	0.842448	0.719618	0.779967	0.827291	0.803071	0.830736	0.800651	0.791076	0.675899	0.66212	0.765334	0.683523	0.732904	0.689281	0.732502	0.736403	0.771758	0.76819	0.864023	0.787797	0.76847	0.849989	0.830448	0.64738	0.786007
	2	0.86086	0.846856	0.889193	0.870949	0.892965	0.83386	0.913081	0.916698	0.802078	0.853676	0.915458	0.872334	0.878246	0.836986	0.836695	0.856614	0.915108	0.848484	0.681719	0.807547	0.770165	0.759895	0.819146	0.859448	0.854107	0.904282	0.870613	0.852836	0.886784	0.855875	0.695065	0.847376
	5	0.956684	0.964847	0.930589	0.989631	0.973859	0.922734	0.990967	0.947096	0.906594	0.923707	0.945743	0.950223	0.951638	0.923318	0.886809	0.903791	0.9185	0.952945	0.883187	0.893462	0.906138	0.886267	0.910606	0.879244	0.908278	0.937638	0.952844	0.940081	0.89653	0.961948	0.834096	0.913832
	10	0.994251	0.984868	1.01457	0.997645	1.00723	0.987481	1.00805	1.01696	0.962882	1.00847	0.990672	0.997552	0.984933	0.9804	0.949455	1.01047	1.00341	0.999197	0.961422	0.975144	0.96693	0.98619	0.981755	0.967904	0.979435	0.986288	1.00813	0.981575	0.966034	0.976682	0.934094	0.975018
	20	0.987628	1.03428	1.02428	1.00947	1.00941	0.938887	0.995752	1.01676	0.95621	1.01442	1.02639	1.00123	0.996846	1.00377	0.973656	0.985285	1.12932	1.0541	1.00258	1.01008	0.993159	1.00244	1.01512	0.993525	1.00728	0.974505	0.989402	0.970373	0.973772	0.996787	1.00507	0.988839
	30	1.05297	0.987161	1.03749	1.01851	1.01429	0.919754	0.962677	1.01243	0.952496	1.01632	1.01709	0.999197	0.999881	0.99801	0.979972	0.993986	1.06575	1.02304	0.976616	1.00934	0.979948	1.01336	1.00399	0.990918	0.989423	0.972649	0.98919	0.96929	0.959209	0.992402	0.922992	0.973259
																																	#DIV/0!
																																	#DIV/0!
Figure 5E		Percent fast tau
		WT (n=11)	Kv3.3 KO (n=10)	Kv3.1 KO (n=8)
		78.1	53.07	65.97									65.7133
		43.05	56.21	69.18									56.1467
		60.56	73.47	58.41									64.1467
		55.18	40.01	35.35									43.5133
		73.78	46.93	55.2									58.6367
		59.31	46.75	44.01									50.0233
		36.59	48.26	88.13									57.66
		64.3	59.31	42.74									55.45
		52.57	21.86										37.215
		64.55	53.5										59.025
		73.18											73.18
	Average	60.1064	49.937	57.3738									55.8057
	One way ANOVA, not significant P=2665
Figure 5F		Fast tau (s)
		WT (n=11)	Kv3.3 KO (n=10)	Kv3.1 KO (n=8)
		0.5045	0.05565	0.5949									0.385017
		0.4758	0.0331	0.7074									0.405433
		0.4029	0.631	0.4544									0.4961
		0.279	0.1092	0.1934									0.193867
		0.5106	0.2375	0.5136									0.420567
		0.3307	0.09907	0.1206									0.183457
		0.1556	0.08303	0.5645									0.26771
		0.5319	0.4809	0.1337									0.382167
		0.6262	0.2544	0.3693									0.416633
		0.6336	0.1834										0.4085
		0.6169											0.6169
	Average	0.4607	0.216725	0.405756									0.36106
	Kruksall-wallis and Dunn’s multiple comparison		P=0.0250 compared to WT	P= <0.9999 compared to WT
		Slow tau (s)
Figure 5G		WT (n=11)	Kv3.3 KO (n=10)	Kv3.1 KO (n=8)
		13.57	1.181	7.509									7.42
		2.743	1.113	5.82									3.22533
		5.1	6.895	3.367									5.12067
		2.305	2.833	1.738									2.292
		3.778	4.338	2.469									3.52833
		2.18	2.908	2.575									2.55433
		1.788	3.769	8.764									4.77367
		4.635	4.143	2.099									3.62567
		2.761	3.135	4.27									3.38867
		4.996	2.567										3.7815
		7.633											7.633
	Average	4.68082	3.2882	4.29011									4.08638
	Kruksal-wallis test, not significant P=0.7110		P=0.0250 compared to WT	P= <0.9999 compared to WT
