# Supplementary material for: Kv3.3 subunits control presynaptic action potential waveform and neurotransmitter release at a central excitatory synapse
Source: eLife. 2022 May 5;11:e75219. doi: 10.7554/eLife.75219 (PMC9110028; doi:10.7554/eLife.75219)
Supplement: Figure 6—source data 1. [file elife-75219-fig6-data1.xlsx]

## Sheet: Figure 6
Figure 6	Is enhanced release in the Kv3.3 KO due to changes in release probability?	Only normalised experimental data was used to fit the model.
		Normalised EPSC amplitudes - conditioning train and recovery pulses - 100Hz stimulation
	Time (s)	WT (n=8)								Average	Kv3.3 KO (n=11)											Average
	0.01	1	1	1	1	1	1	1	1	1	1	1	1	1	1	1	1	1	1	1	1	1
	0.02	0.938122	0.844591	0.807511	0.882226	0.878929	0.903692	0.923733	0.810671	0.873684	0.788814	0.743231	0.796061	0.68975	0.89748	0.764681	0.692017	0.73426	0.330266	0.614051	0.635932	0.698777
	0.03	0.863293	0.672433	0.710308	0.721037	0.80038	0.809433	0.789207	0.691368	0.757182	0.681639	0.634332	0.719388	0.547955	0.752715	0.61749	0.612819	0.628709	0.214693	0.499123	0.480501	0.580851
	0.04	0.771588	0.567065	0.632872	0.687038	0.732844	0.718133	0.754944	0.625079	0.686195	0.579811	0.545471	0.653525	0.449308	0.602825	0.536317	0.490344	0.548056	0.205515	0.405145	0.387856	0.491288
	0.05	0.730955	0.553961	0.526114	0.648619	0.679562	0.648888	0.643679	0.545566	0.622168	0.56049	0.520169	0.618618	0.436129	0.55118	0.475712	0.43257	0.499875	0.157216	0.381467	0.362272	0.454154
	0.06	0.71859	0.483504	0.481679	0.627308	0.628946	0.656468	0.639993	0.52175	0.59478	0.507996	0.487377	0.565825	0.404844	0.500564	0.442289	0.413825	0.478512	0.142654	0.319755	0.30786	0.415591
	0.07	0.706677	0.485242	0.488032	0.566145	0.597779	0.64047	0.510497	0.477563	0.559051	0.499005	0.473208	0.540229	0.34645	0.452132	0.389453	0.369276	0.450672	0.147318	0.328039	0.289952	0.389612
	0.08	0.697966	0.447599	0.506668	0.570122	0.576091	0.577395	0.474028	0.434183	0.535506	0.459999	0.432219	0.542482	0.325622	0.390808	0.405246	0.355525	0.412133	0.129879	0.29616	0.304854	0.36863
	0.09	0.60963	0.389704	0.432854	0.619571	0.53555	0.516744	0.425571	0.389139	0.489845	0.436911	0.442036	0.517207	0.330537	0.416735	0.34639	0.306942	0.398283	0.139216	0.282912	0.277012	0.354016
	0.1	0.702584	0.3795	0.426441	0.507118	0.527808	0.478401	0.408753	0.378491	0.476137	0.442622	0.435458	0.528986	0.31389	0.411769	0.310976	0.313697	0.386145	0.126558	0.286273	0.256848	0.346657
	0.11	0.606532	0.380896	0.405185	0.55669	0.51312	0.498436	0.371879	0.311267	0.455501	0.440678	0.434648	0.476514	0.292804	0.402239	0.302074	0.295495	0.351038	0.154304	0.262244	0.270442	0.334771
	0.12	0.595282	0.376026	0.399531	0.556185	0.489957	0.464784	0.347133	0.352532	0.447679	0.410421	0.375745	0.49836	0.26363	0.374987	0.274845	0.26326	0.347814	0.153421	0.28864	0.248779	0.318173
	0.13	0.578736	0.371203	0.381275	0.603979	0.503074	0.458856	0.386755	0.378907	0.457848	0.42804	0.44325	0.537766	0.241992	0.398147	0.29177	0.288986	0.350943	0.131997	0.29237	0.30247	0.337066
	0.14	0.582564	0.389623	0.371163	0.530707	0.495278	0.45751	0.366455	0.310401	0.437963	0.425611	0.435154	0.504142	0.258794	0.36157	0.343025	0.287151	0.3572	0.149851	0.297003	0.28472	0.336747
	0.15	0.558867	0.3328	0.371106	0.536749	0.495234	0.396227	0.364603	0.323813	0.422425	0.432294	0.435052	0.509176	0.259807	0.333449	0.329354	0.263964	0.359421	0.14262	0.313075	0.296536	0.334068
	0.16	0.54612	0.329473	0.343911	0.558365	0.485679	0.43222	0.337138	0.363331	0.42453	0.440435	0.439303	0.56422	0.267113	0.318886	0.294261	0.255777	0.356226	0.145595	0.306454	0.296563	0.334985
	0.17	0.562908	0.325313	0.35026	0.522131	0.454199	0.386812	0.362775	0.344345	0.413593	0.461214	0.434344	0.516243	0.22638	0.299462	0.308501	0.264369	0.371754	0.148436	0.284698	0.295735	0.328285
	0.18	0.546668	0.321768	0.408558	0.564639	0.435351	0.364525	0.349139	0.344212	0.416857	0.435332	0.459342	0.516243	0.269708	0.348219	0.284964	0.260746	0.357865	0.14632	0.301712	0.275491	0.332358
	0.19	0.565709	0.338305	0.365439	0.571202	0.468336	0.380918	0.340414	0.330317	0.42008	0.440314	0.432826	0.553509	0.257865	0.307075	0.301549	0.258105	0.367162	0.156533	0.323614	0.292775	0.335575
	0.2	0.454817	0.3419	0.367369	0.57387	0.48638	0.388024	0.345467	0.318657	0.409561	0.470813	0.428272	0.526202	0.254454	0.279644	0.309075	0.256956	0.363016	0.154228	0.296257	0.299752	0.330788
	0.21	0.551568	0.299446	0.365462	0.484204	0.469575	0.434427	0.348374	0.313931	0.408373	0.448212	0.446489	0.494612	0.224455	0.317825	0.331873	0.252139	0.362917	0.138112	0.292466	0.284503	0.326691
	0.22	0.518985	0.325362	0.354439	0.50918	0.438902	0.433876	0.334246	0.325496	0.405061	0.451128	0.437178	0.521705	0.266069	0.333519	0.316048	0.245601	0.354162	0.14628	0.299642	0.288775	0.332737
	0.23	0.565026	0.331276	0.390691	0.526194	0.432217	0.371548	0.312138	0.308813	0.404738	0.434845	0.439506	0.500502	0.278289	0.326343	0.311415	0.265949	0.356264	0.143844	0.293585	0.266656	0.328836
	0.24	0.606301	0.328032	0.424776	0.539689	0.476397	0.407646	0.345465	0.346405	0.434339	0.445174	0.435255	0.525881	0.278753	0.304447	0.30953	0.299363	0.377572	0.145743	0.287332	0.263847	0.3339
	0.25	0.601007	0.378907	0.379049	0.506491	0.452944	0.391177	0.326841	0.355782	0.424025	0.448698	0.432219	0.52149	0.289165	0.282561	0.321714	0.303871	0.374387	0.150857	0.28702	0.284691	0.336061
	0.26	0.554618	0.31644	0.391724	0.520744	0.464303	0.373719	0.321048	0.311845	0.406805	0.464495	0.409042	0.500716	0.26925	0.306546	0.324844	0.286667	0.386266	0.143125	0.292445	0.285533	0.333539
	0.27	0.560533	0.376071	0.353552	0.513676	0.455986	0.462563	0.318227	0.298548	0.417394	0.449305	0.405196	0.514209	0.24701	0.349273	0.288056	0.255596	0.38743	0.152216	0.284159	0.286994	0.32904
	0.28	0.538521	0.318449	0.36563	0.541926	0.476358	0.422142	0.327893	0.341449	0.416546	0.448334	0.431611	0.49836	0.27935	0.299648	0.33323	0.252786	0.392526	0.160927	0.272615	0.278314	0.331609
	0.29	0.491395	0.389295	0.38764	0.54139	0.453929	0.385794	0.330842	0.318693	0.412372	0.443837	0.429385	0.5171	0.276079	0.301612	0.284865	0.287804	0.364275	0.146327	0.274613	0.282246	0.328013
	0.3	0.471776	0.354882	0.367672	0.584296	0.483577	0.424006	0.31097	0.335515	0.416587	0.447969	0.41643	0.523311	0.275602	0.303319	0.317279	0.270955	0.378016	0.143566	0.288166	0.264223	0.329894
	0.31	0.542055	0.337443	0.364171	0.518116	0.433439	0.452037	0.311489	0.323318	0.410259	0.434237	0.397808	0.510032	0.262999	0.389984	0.306114	0.294114	0.376475	0.131213	0.288766	0.28245	0.334017
	0.32	0.515682	0.375673	0.392796	0.535788	0.497251	0.416592	0.320613	0.308724	0.42039	0.435696	0.417645	0.49065	0.279422	0.296461	0.338519	0.26741	0.355934	0.12558	0.296115	0.283006	0.32604
	0.33	0.580517	0.35284	0.385613	0.56558	0.480033	0.434799	0.341775	0.323277	0.433054	0.448212	0.406613	0.515387	0.274963	0.297688	0.312404	0.300714	0.386015	0.133463	0.28719	0.276275	0.330811
	0.34	0.488001	0.336009	0.376265	0.502192	0.437518	0.473187	0.318326	0.349265	0.410095	0.435575	0.43151	0.504571	0.275869	0.301698	0.343587	0.264958	0.361941	0.149147	0.287625	0.279587	0.330552
	0.35	0.565295	0.344278	0.366216	0.51083	0.471813	0.450855	0.346543	0.366146	0.427747	0.434845	0.410459	0.514316	0.28065	0.30403	0.303916	0.27897	0.36038	0.137648	0.291861	0.28555	0.327511
	0.36	0.543305	0.374996	0.360042	0.549475	0.460706	0.411432	0.319494	0.335686	0.419392	0.445903	0.426855	0.513459	0.275694	0.320123	0.309741	0.27344	0.366254	0.142451	0.274945	0.268162	0.328821
	0.37	0.502271	0.351882	0.377986	0.528961	0.46028	0.440504	0.334431	0.32276	0.414884	0.431321	0.397504	0.499109	0.270269	0.336347	0.313121	0.276538	0.361291	0.148546	0.287575	0.278301	0.327266
	0.38	0.60654	0.370267	0.354062	0.557375	0.482632	0.409435	0.302442	0.352302	0.429382	0.441529	0.425539	0.50607	0.280277	0.290358	0.327884	0.263931	0.360716	0.154943	0.294668	0.294629	0.330959
	0.39	0.620517	0.331826	0.353212	0.525294	0.486263	0.379816	0.279203	0.341153	0.41466	0.438126	0.399933	0.493755	0.273016	0.328391	0.324147	0.290132	0.351717	0.149836	0.287612	0.251738	0.326218
	0.4	0.588286	0.368626	0.375131	0.51297	0.476281	0.397279	0.318023	0.340285	0.42211	0.446632	0.421693	0.497717	0.248811	0.309447	0.323361	0.266138	0.369366	0.154402	0.288457	0.268927	0.326814
	0.41	0.555597	0.341899	0.381783	0.553151	0.520033	0.41946	0.367452	0.340002	0.434922	0.434602	0.390926	0.484546	0.264605	0.283294	0.35448	0.251867	0.358367	0.137272	0.269581	0.251787	0.316484
	0.42	0.520826	0.343192	0.346776	0.583682	0.44717	0.374988	0.291474	0.313397	0.402688	0.412487	0.409852	0.512602	0.245996	0.330377	0.31181	0.267168	0.362434	0.119019	0.256312	0.285635	0.319427
	0.43	0.55338	0.360399	0.399808	0.567847	0.49394	0.354517	0.333799	0.297023	0.420089	0.434359	0.420985	0.510461	0.290761	0.324518	0.311354	0.2595	0.371306	0.133257	0.274683	0.272817	0.327636
	0.44	0.588868	0.37377	0.391685	0.515558	0.453201	0.407292	0.321802	0.298565	0.418843	0.450763	0.419365	0.511639	0.264685	0.329591	0.321346	0.242976	0.368901	0.139404	0.268923	0.26106	0.325332
	0.45	0.562049	0.33343	0.361768	0.481896	0.491589	0.457678	0.329991	0.331767	0.418771	0.438613	0.423616	0.54805	0.24706	0.335203	0.310775	0.291554	0.341888	0.151198	0.275345	0.281823	0.331375
	0.46	0.577692	0.347826	0.378192	0.515204	0.483015	0.413106	0.330948	0.359027	0.425626	0.427676	0.394164	0.520099	0.275178	0.364904	0.304612	0.284676	0.364085	0.146025	0.260069	0.26149	0.327543
	0.47	0.620667	0.336094	0.348697	0.600183	0.448462	0.472404	0.32387	0.289811	0.430024	0.453437	0.394164	0.490436	0.257376	0.341564	0.324544	0.262018	0.350969	0.140234	0.281768	0.281608	0.325283
	0.48	0.55514	0.343025	0.360746	0.529386	0.494397	0.417416	0.345677	0.32327	0.421132	0.459634	0.405905	0.472874	0.255154	0.279999	0.300206	0.273873	0.35039	0.147118	0.277051	0.273871	0.317825
	0.49	0.560836	0.31867	0.375793	0.551677	0.483839	0.358307	0.349038	0.312508	0.413833	0.447726	0.418758	0.52877	0.279848	0.362461	0.323069	0.278507	0.367471	0.15103	0.284917	0.2545	0.336096
	0.5	0.59217	0.351804	0.390049	0.535651	0.444671	0.43818	0.329567	0.371201	0.431662	0.421965	0.391027	0.490543	0.266843	0.31705	0.337134	0.237037	0.348932	0.139537	0.274203	0.265758	0.317275
	0.51	0.539374	0.330149	0.358578	0.591058	0.475713	0.360704	0.29686	0.343601	0.412005	0.435453	0.408941	0.484225	0.258981	0.376487	0.300451	0.271949	0.362179	0.143332	0.273974	0.287259	0.327566
	0.52	0.62903	0.308695	0.382905	0.507679	0.464033	0.460647	0.34149	0.308004	0.42531	0.43764	0.414609	0.475444	0.300933	0.329741	0.304274	0.256599	0.346205	0.13517	0.257443	0.257258	0.319574
	0.53	0.536657	0.335557	0.378313	0.583744	0.430505	0.503848	0.36807	0.32299	0.43246	0.412851	0.371898	0.457132	0.267235	0.370147	0.30525	0.294577	0.364998	0.144287	0.278615	0.276885	0.32217
	0.54	0.585029	0.335637	0.338686	0.586828	0.472274	0.459765	0.315055	0.33013	0.427926	0.436182	0.41471	0.519135	0.258885	0.342628	0.308364	0.253727	0.350512	0.148728	0.268292	0.251196	0.322942
	0.55	0.621034	0.324792	0.396076	0.484457	0.474534	0.421612	0.326582	0.342406	0.423937	0.451979	0.407625	0.517314	0.2513	0.323843	0.313919	0.294563	0.365783	0.143282	0.268982	0.253158	0.326523
	0.56	0.581012	0.329457	0.378238	0.553232	0.488827	0.434697	0.395751	0.332718	0.436742	0.438369	0.403779	0.487651	0.277742	0.329653	0.308458	0.274398	0.373359	0.130875	0.267075	0.258188	0.322686
	0.57	0.642814	0.369447	0.38004	0.566307	0.487801	0.40456	0.302307	0.32748	0.435094	0.417105	0.414912	0.493541	0.26004	0.329981	0.288407	0.231407	0.360907	0.14787	0.277328	0.27703	0.318048
	0.58	0.610767	0.31663	0.354015	0.54514	0.471933	0.407389	0.353646	0.349871	0.426174	0.42476	0.408435	0.498574	0.271488	0.331412	0.317981	0.314724	0.349133	0.114201	0.263657	0.268739	0.323919
	0.59	0.571993	0.359727	0.364107	0.551227	0.47312	0.438802	0.344999	0.324772	0.428593	0.447239	0.422402	0.530702	0.29201	0.329333	0.324258	0.268443	0.357172	0.127384	0.279815	0.26342	0.331107
	0.6	0.61597	0.369298	0.369858	0.555116	0.447427	0.460152	0.321827	0.296934	0.429573	0.435939	0.386472	0.527381	0.279347	0.322643	0.324264	0.295651	0.354206	0.125518	0.265	0.263884	0.325482
	0.61	0.600072	0.359891	0.38898	0.506684	0.453348	0.470782	0.34034	0.327299	0.430924	0.448698	0.398921	0.477264	0.275029	0.354361	0.28966	0.281653	0.35865	0.146334	0.259872	0.271839	0.323844
	0.62	0.538461	0.357574	0.409933	0.573307	0.470985	0.405036	0.31979	0.32518	0.425033	0.426582	0.393759	0.52481	0.299524	0.315899	0.302423	0.285221	0.366294	0.139694	0.28577	0.287764	0.329795
	0.63	0.584211	0.320252	0.388909	0.562218	0.477817	0.444413	0.346365	0.32278	0.430871	0.429013	0.380299	0.486902	0.267388	0.37769	0.321626	0.279736	0.341021	0.137652	0.276244	0.291335	0.326264
	0.64	0.586523	0.359573	0.334352	0.535853	0.4928	0.342056	0.332525	0.36116	0.418105	0.428405	0.394468	0.487009	0.249823	0.342575	0.357598	0.26184	0.356483	0.134387	0.259225	0.284774	0.323326
	0.65	0.597126	0.345064	0.390846	0.566565	0.483456	0.428391	0.372078	0.33209	0.439452	0.405925	0.392242	0.463236	0.263468	0.276333	0.305857	0.265824	0.345501	0.178827	0.275803	0.270591	0.313055
	0.66	0.551665	0.354283	0.412245	0.56429	0.459708	0.391141	0.353158	0.369342	0.431979	0.440799	0.439303	0.456383	0.276179	0.345096	0.315304	0.296467	0.360795	0.139852	0.250976	0.273107	0.326751
	0.67	0.597762	0.352472	0.35646	0.554476	0.485474	0.468204	0.349086	0.37879	0.442841	0.418076	0.370887	0.488187	0.29494	0.318038	0.275587	0.227409	0.352666	0.145199	0.268978	0.28915	0.313556
	0.68	0.564114	0.346548	0.36917	0.565096	0.499915	0.373251	0.361287	0.299567	0.422368	0.429134	0.382323	0.480156	0.270544	0.313032	0.334176	0.305308	0.361075	0.126339	0.239486	0.270578	0.319286
	0.69	0.565922	0.366931	0.338568	0.558976	0.455677	0.417958	0.346618	0.305607	0.419532	0.407383	0.397504	0.498467	0.271707	0.342428	0.315124	0.267419	0.361061	0.135441	0.238901	0.24905	0.316771
	0.7	0.591511	0.341729	0.368274	0.524932	0.487509	0.409628	0.339683	0.357954	0.427652	0.440192	0.409953	0.464735	0.239199	0.320884	0.324563	0.269414	0.343246	0.150624	0.269908	0.2496	0.316574
	0.71	0.612424	0.346062	0.380257	0.570062	0.488246	0.410368	0.372079	0.337428	0.439616	0.442865	0.391128	0.48551	0.250344	0.312736	0.294582	0.280837	0.35077	0.140745	0.277131	0.270832	0.317953
	0.72	0.542014	0.348784	0.356256	0.54669	0.496301	0.439416	0.368699	0.333877	0.429005	0.447847	0.398212	0.506177	0.295137	0.332598	0.309915	0.258579	0.353143	0.119429	0.289238	0.25822	0.324409
	0.73	0.563678	0.382355	0.379441	0.546301	0.471537	0.448062	0.344235	0.339429	0.43438	0.424152	0.398921	0.465056	0.243853	0.359886	0.282192	0.246695	0.348995	0.132409	0.27531	0.269112	0.313326
	0.74	0.576943	0.358664	0.362635	0.53379	0.442864	0.454033	0.293763	0.330358	0.419131	0.433752	0.4055	0.48808	0.235983	0.373092	0.333823	0.24653	0.350699	0.157801	0.265211	0.270673	0.32374
	0.75	0.627475	0.335181	0.381172	0.556656	0.490633	0.479833	0.325499	0.349957	0.443301	0.411029	0.39295	0.505642	0.250972	0.346024	0.288671	0.240684	0.346185	0.138286	0.257616	0.267867	0.313266
	0.76	0.599032	0.377997	0.378629	0.492899	0.458984	0.406309	0.345893	0.339015	0.424845	0.43035	0.410762	0.476836	0.284733	0.346799	0.286014	0.286736	0.333811	0.127816	0.285069	0.271377	0.321846
	0.77	0.491051	0.341533	0.368964	0.55271	0.492477	0.428082	0.375444	0.345597	0.424482	0.43679	0.412584	0.4627	0.286794	0.36218	0.284574	0.261784	0.344263	0.13547	0.271767	0.270673	0.320871
	0.78	0.601654	0.317572	0.376622	0.558749	0.449611	0.388388	0.327343	0.322843	0.417848	0.419049	0.381311	0.527486	0.240773	0.326066	0.335474	0.277064	0.351215	0.131157	0.233383	0.260786	0.316706
	0.79	0.503235	0.376402	0.365152	0.536861	0.465868	0.375427	0.32054	0.320328	0.407977	0.434481	0.400136	0.483582	0.30661	0.297676	0.323718	0.267876	0.350428	0.135727	0.249333	0.281475	0.321004
	0.8	0.599252	0.350479	0.377119	0.599047	0.472069	0.447472	0.316444	0.309194	0.433885	0.41589	0.369368	0.510889	0.25662	0.316052	0.297089	0.276186	0.353544	0.141171	0.267455	0.265331	0.315418
	0.81	0.627288	0.370939	0.387392	0.509416	0.473576	0.423762	0.328507	0.319204	0.430011	0.415525	0.424021	0.497504	0.291463	0.310421	0.309222	0.290041	0.354543	0.134425	0.243244	0.253592	0.320364
	0.82	0.618013	0.369788	0.36539	0.563772	0.448243	0.410659	0.343574	0.315697	0.429392	0.417955	0.398516	0.461308	0.274678	0.330634	0.31993	0.261037	0.354035	0.1402	0.27003	0.267132	0.317769
	0.83	0.601597	0.36115	0.373738	0.557977	0.504399	0.366112	0.405102	0.318648	0.43609	0.42318	0.3804	0.481869	0.23303	0.331826	0.349175	0.27082	0.336315	0.138803	0.229951	0.252886	0.31166
	0.84	0.580021	0.374059	0.394495	0.574191	0.502126	0.462336	0.363234	0.34532	0.449473	0.432536	0.375542	0.509818	0.307563	0.358248	0.315294	0.275326	0.343881	0.147435	0.255735	0.26963	0.326455
	0.85	0.631194	0.359646	0.378478	0.537419	0.493433	0.424154	0.311917	0.305934	0.430272	0.430106	0.368559	0.494184	0.263166	0.32391	0.315317	0.269867	0.343466	0.14526	0.250932	0.256478	0.314659
	0.86	0.606756	0.302407	0.358719	0.534089	0.478142	0.431421	0.37328	0.366197	0.431376	0.422087	0.395683	0.47705	0.26688	0.321168	0.300979	0.263576	0.342521	0.140616	0.266507	0.223288	0.310941
	0.87	0.59971	0.340299	0.327964	0.580372	0.467361	0.394145	0.338091	0.350484	0.424803	0.398756	0.395075	0.459166	0.280406	0.306034	0.31841	0.248047	0.333535	0.146652	0.271939	0.258958	0.310634
	0.88	0.621715	0.362394	0.364353	0.588738	0.480862	0.397942	0.386213	0.294203	0.437053	0.410056	0.400034	0.487759	0.314458	0.338611	0.349527	0.270647	0.326628	0.144675	0.270309	0.255161	0.324351
	0.89	0.584706	0.328186	0.369292	0.549284	0.471295	0.453605	0.307053	0.345482	0.426113	0.425732	0.388092	0.492577	0.272631	0.341648	0.317523	0.260485	0.343733	0.118182	0.270789	0.271187	0.318416
	0.9	0.601249	0.35698	0.352756	0.517595	0.477138	0.418076	0.342758	0.369143	0.429462	0.418684	0.386472	0.493434	0.297619	0.34629	0.346291	0.295229	0.340527	0.124563	0.250619	0.262727	0.32386
	0.91	0.608477	0.330087	0.392087	0.515387	0.472456	0.461048	0.334227	0.335092	0.431108	0.398877	0.387586	0.466341	0.253717	0.342075	0.324111	0.254988	0.344527	0.139244	0.266713	0.252992	0.311925
	0.92	0.585943	0.366158	0.372534	0.520166	0.459063	0.396734	0.377795	0.332794	0.426398	0.415282	0.384145	0.468911	0.262027	0.312717	0.299451	0.28094	0.335662	0.140597	0.256628	0.272752	0.311737
	0.93	0.569307	0.311355	0.338523	0.531335	0.45484	0.447654	0.348653	0.337831	0.417437	0.404346	0.364207	0.485831	0.253473	0.304105	0.319412	0.282965	0.354401	0.135691	0.245389	0.258971	0.30989
	0.94	0.574761	0.33533	0.375831	0.550662	0.479268	0.415365	0.324165	0.301387	0.419596	0.399607	0.399022	0.496647	0.287836	0.360704	0.290957	0.307368	0.3438	0.143484	0.256409	0.258128	0.322178
	0.95	0.564515	0.354923	0.351585	0.55292	0.462978	0.389651	0.382771	0.304978	0.42054	0.436911	0.384145	0.45906	0.287495	0.344532	0.309284	0.267108	0.33377	0.102195	0.285855	0.261386	0.315613
	0.96	0.606741	0.365557	0.371947	0.509609	0.415607	0.383186	0.318793	0.342111	0.414194	0.421479	0.37878	0.472124	0.235533	0.293765	0.337363	0.285743	0.330457	0.138704	0.258813	0.264168	0.31063
	0.97	0.544164	0.378256	0.348279	0.562735	0.465472	0.417588	0.356047	0.276487	0.418629	0.416983	0.38546	0.486152	0.252259	0.336634	0.325743	0.259307	0.33621	0.142083	0.253902	0.235536	0.311843
	0.98	0.590792	0.342058	0.361277	0.548384	0.505596	0.411345	0.301826	0.304175	0.420682	0.429134	0.414103	0.478549	0.242564	0.344661	0.32355	0.262131	0.342204	0.126301	0.249252	0.274604	0.317005
	0.99	0.649111	0.319969	0.426676	0.558282	0.481146	0.377287	0.342757	0.338259	0.436686	0.418319	0.396087	0.44064	0.268675	0.376531	0.307739	0.267443	0.352141	0.138802	0.261861	0.246074	0.315847
	1	0.553143	0.329465	0.384205	0.500613	0.465769	0.413629	0.346517	0.335759	0.416137	0.433995	0.38708	0.448886	0.287603	0.347917	0.26965	0.269233	0.344668	0.136162	0.249506	0.257266	0.311997
	1.05	0.615241	0.376058	0.450329	0.532741	0.496195	0.460633	0.380425	0.402896	0.464315	0.531206	0.510352	0.590237	0.353174	0.382903	0.403513	0.325236	0.551663	0.20415	0.368	0.368995	0.417221
	1.1	0.614433	0.468037	0.458656	0.592015	0.511191	0.570908	0.465827	0.533398	0.526808	0.572156	0.580185	0.619902	0.359713	0.428388	0.425243	0.317101	0.639575	0.253131	0.444577	0.41656	0.459685
	1.5	0.756917	0.537821	0.613209	0.720761	0.666854	0.689605	0.57738	0.662319	0.653108	0.746406	0.696371	0.728704	0.487389	0.507587	0.596076	0.494193	0.776002	0.472671	0.610315	0.604709	0.610948
	2	0.842448	0.719618	0.779967	0.827291	0.768974	0.795908	0.808569	0.791284	0.791757	0.830736	0.800651	0.791076	0.675899	0.66212	0.765334	0.683523	0.829779	0.732904	0.689281	0.732502	0.744891
	3	0.916698	0.802078	0.853676	0.915458	0.846856	0.889193	0.870949	0.83386	0.866096	0.878246	0.836986	0.836695	0.856614	0.915108	0.848484	0.681719	0.907702	0.807547	0.770165	0.759895	0.827196
	6	0.947096	0.906594	0.923707	0.945743	0.964847	0.930589	0.989631	0.922734	0.941368	0.951638	0.923318	0.886809	0.903791	0.9185	0.952945	0.883187	0.974979	0.893462	0.906138	0.886267	0.916458
	11	1.01696	0.962882	1.00847	0.990672	0.984868	1.01457	0.997645	0.987481	0.995443	0.984933	0.9804	0.949455	1.01047	1.00341	0.999197	0.961422	0.987895	0.975144	0.96693	0.98619	0.982313
	21	1.01676	0.95621	1.01442	1.02639	1.03428	1.02428	1.00947	0.938887	1.00259	0.996846	1.00377	0.973656	0.985285	1.12932	1.0541	1.00258	0.96089	1.01008	0.993159	1.00244	1.01019
	31	1.01243	0.952496	1.01632	1.01709	0.987161	1.03749	1.01851	0.919754	0.995154	0.999881	0.99801	0.979972	0.993986	1.06575	1.02304	0.976616	0.916634	1.00934	0.979948	1.01336	0.996049
		Raw EPSC amplitudes - conditioning train and recovery pulses used to generate normalised data - 100Hz stimulation (nA)
	Time (s)	WT (n=8)								Average	Kv3.3 KO (n=11)											Average
	0.01	-14.9258	-11.7889	-14.6603	-13.2215	-11.4279	-12.36	-14.6758	-14.8814	-13.4927	-12.5573	-15.0766	-18.9988	-15.0706	-25.0425	-27.684	-19.1989	-17.7681	-17.2223	-22.4287	-16.7121	-18.8873
	0.02	-14.0057	-9.96398	-11.8298	-11.6208	-10.3182	-10.8476	-13.5406	-12.054	-11.7726	-9.90537	-11.2054	-15.1242	-13.4867	-17.2742	-21.1669	-13.2739	-13.034	-5.68417	-13.7727	-10.6122	-13.14
	0.03	-12.8781	-7.90252	-10.4214	-9.50749	-9.24768	-9.88079	-11.5661	-10.2015	-10.2007	-8.55954	-9.56357	-13.6675	-11.468	-13.6259	-17.0913	-11.7526	-11.1654	-3.68465	-11.1958	-8.02189	-10.8906
	0.04	-11.5018	-6.7047	-9.2724	-9.10924	-8.2052	-9.05193	-11.0747	-9.1914	-9.26392	-7.28086	-8.22385	-12.4162	-9.01894	-11.2577	-14.8468	-9.43628	-9.72518	-3.53329	-9.0779	-6.47526	-9.20839
	0.05	-10.8899	-6.52465	-7.70075	-8.52025	-7.40076	-8.37811	-9.45731	-8.01648	-8.36103	-7.03824	-7.84238	-11.753	-8.22548	-10.861	-13.1469	-8.27356	-8.88155	-2.69955	-8.56154	-6.05167	-8.48499
	0.06	-10.7159	-5.69305	-7.05835	-8.31883	-7.51184	-7.76775	-9.37491	-7.5404	-7.99763	-6.37906	-7.34799	-10.75	-7.53731	-10.1728	-12.2451	-7.89209	-8.49589	-2.43709	-7.16994	-5.13615	-7.77849
	0.07	-10.5405	-5.71593	-7.14838	-7.42772	-7.33118	-7.38079	-7.50571	-7.01092	-7.50764	-6.26615	-7.13437	-10.2637	-6.86287	-8.64234	-10.7788	-7.02539	-7.99111	-2.54452	-7.35426	-4.83097	-7.24495
	0.08	-10.4428	-5.27496	-7.41693	-7.49333	-6.58899	-7.11956	-6.94876	-6.46466	-7.21875	-5.77634	-6.51639	-10.3065	-5.8741	-8.09303	-11.2152	-6.81635	-7.31069	-2.25033	-6.63283	-5.09586	-6.89887
	0.09	-9.10767	-4.58678	-6.34119	-8.19219	-5.90418	-6.60198	-6.25296	-5.69867	-6.5857	-5.48642	-6.6644	-9.82631	-6.26167	-8.23646	-9.57179	-5.8642	-7.0557	-2.40292	-6.3484	-4.63322	-6.57741
	0.1	-10.4733	-4.44793	-6.24506	-6.68919	-5.45252	-6.50799	-6.00119	-5.67273	-6.43624	-5.55814	-6.56522	-10.0501	-6.17928	-7.83515	-8.62727	-5.96338	-6.83981	-2.17342	-6.42287	-4.29386	-6.40986
	0.11	-9.05731	-4.4754	-5.93378	-7.36211	-5.6698	-6.34319	-5.45951	-4.56036	-6.10768	-5.53373	-6.55301	-9.0532	-6.0801	-7.33314	-8.35261	-5.6872	-6.23647	-2.65682	-5.8882	-4.51725	-6.17198
	0.12	-8.88336	-4.43267	-5.84528	-7.33617	-5.30725	-6.06121	-5.0994	-5.11273	-6.00976	-5.15378	-5.66495	-9.46824	-5.59487	-6.59767	-7.62019	-5.06922	-6.15011	-2.63363	-6.46681	-4.15348	-5.87027
	0.13	-8.65143	-4.37316	-5.58283	-7.9221	-5.23523	-6.21746	-5.66702	-5.55066	-6.14999	-5.37503	-6.68271	-10.2169	-6.03127	-6.04988	-8.09169	-5.54376	-6.21861	-2.26742	-6.56081	-5.05558	-6.19033
	0.14	-8.68957	-4.58831	-5.4455	-6.98369	-5.20716	-6.12469	-5.3649	-4.5741	-5.87224	-5.34452	-6.56064	-9.5781	-5.41176	-6.49238	-9.5016	-5.52698	-6.32463	-2.59457	-6.65602	-4.74552	-6.24879
	0.15	-8.33099	-3.91692	-5.4455	-7.05541	-4.52967	-6.11858	-5.34506	-4.75873	-5.68761	-5.42844	-6.55911	-9.67373	-5.0074	-6.54884	-9.11555	-5.0387	-6.36509	-2.45785	-7.01735	-4.94816	-6.19638
	0.16	-8.1723	-3.88641	-5.0152	-7.36668	-4.94593	-5.99407	-4.95597	-5.34619	-5.71034	-5.53067	-6.6232	-10.7195	-4.7831	-6.69532	-8.14814	-4.88764	-6.29366	-2.50057	-6.8672	-4.96403	-6.183
	0.17	-8.40271	-3.833	-5.11438	-6.86009	-4.43445	-5.60833	-5.3237	-4.97235	-5.56863	-5.7916	-6.54843	-9.808	-4.53133	-5.65467	-8.54182	-5.05701	-6.58572	-2.55306	-6.37404	-4.93351	-6.03447
	0.18	-8.14941	-3.78265	-5.97498	-7.40483	-4.16345	-5.37395	-5.12381	-4.9281	-5.61265	-5.46659	-6.92532	-9.808	-5.19966	-6.77772	-7.90095	-4.97614	-6.34	-2.51522	-6.7671	-4.60026	-6.11609
	0.19	-8.44849	-3.98559	-5.34784	-7.53148	-4.33679	-5.77068	-4.99869	-4.8396	-5.6574	-5.52915	-6.52554	-10.516	-4.61067	-6.42219	-8.35109	-4.96393	-6.50118	-2.69344	-7.25294	-4.89445	-6.20551
	0.2	-6.78833	-4.02221	-5.37836	-7.56505	-4.41614	-6.00506	-5.05667	-4.72516	-5.49462	-5.91214	-6.45688	-9.99721	-4.15749	-6.33522	-8.55555	-4.93036	-6.42251	-2.64461	-6.64259	-5.00065	-6.09593
	0.21	-8.23334	-3.51562	-5.35242	-6.38097	-4.95325	-5.7951	-5.1055	-4.5039	-5.48001	-5.62833	-6.73154	-9.39703	-4.78615	-5.59974	-9.1949	-4.83576	-6.43155	-2.37972	-6.56569	-4.75651	-6.0279
	0.22	-7.76031	-3.82537	-5.18	-6.70598	-4.95447	-5.41424	-4.90256	-4.70227	-5.43065	-5.66495	-6.59116	-9.91176	-5.01503	-6.61293	-8.76307	-4.69385	-6.29682	-2.49691	-6.70973	-4.81998	-6.14329
	0.23	-8.4317	-3.90472	-5.71558	-6.94554	-4.25745	-5.35076	-4.57602	-4.61987	-5.4752	-5.46048	-6.62625	-9.50893	-4.89906	-6.93794	-8.60896	-5.11652	-6.28145	-2.48226	-6.58644	-4.46232	-6.08824
	0.24	-9.0451	-3.86962	-6.23133	-7.14085	-4.65784	-5.88299	-5.06888	-5.13257	-5.87865	-5.59018	-6.56217	-9.99111	-4.56032	-6.93489	-8.57234	-5.72077	-6.6818	-2.51156	-6.44118	-4.40495	-6.17921
	0.25	-8.98407	-4.46777	-5.54621	-6.73192	-4.47718	-5.59002	-4.7988	-5.276	-5.734	-5.63443	-6.51639	-9.90769	-4.26277	-7.19886	-8.90345	-5.83979	-6.63817	-2.5909	-6.43141	-4.76017	-6.244
	0.26	-8.24402	-3.72771	-5.73694	-6.84026	-4.25012	-5.75726	-4.70572	-4.60004	-5.48276	-5.8328	-6.16696	-9.513	-4.58016	-6.77314	-9.00111	-5.48273	-6.838	-2.46151	-6.55958	-4.77726	-6.18057
	0.27	-8.37677	-4.43267	-5.17694	-6.75786	-5.27063	-5.62298	-4.65995	-4.34827	-5.58076	-5.64206	-6.10898	-9.76935	-5.31716	-6.19483	-7.95741	-4.86627	-6.8848	-2.62386	-6.36793	-4.79923	-6.04835
	0.28	-8.05939	-3.7384	-5.33869	-7.1378	-4.80677	-5.89275	-4.7927	-5.01202	-5.59731	-5.62986	-6.50723	-9.46824	-4.50539	-6.98219	-9.22389	-4.82508	-6.95871	-2.78011	-6.11403	-4.65885	-6.15033
	0.29	-7.35748	-4.58373	-5.67743	-7.16985	-4.41858	-5.60345	-4.85526	-4.716	-5.54772	-5.5734	-6.47366	-9.82428	-4.51149	-6.88301	-7.89943	-5.52851	-6.44195	-2.50667	-6.15431	-4.71012	-6.04608
	0.3	-7.05841	-4.17938	-5.38446	-7.73137	-4.85071	-5.9782	-4.56076	-4.87164	-5.57687	-5.62528	-6.27835	-9.94228	-4.56185	-6.88606	-8.76918	-5.19281	-6.69378	-2.46517	-6.47169	-4.42082	-6.11884
	0.31	-8.09296	-3.9688	-5.3219	-6.80058	-5.16199	-5.36297	-4.56839	-4.7038	-5.49767	-5.45285	-5.99759	-9.69	-5.86647	-6.61293	-8.48689	-5.65515	-6.6515	-2.26742	-6.47902	-4.71622	-6.17055
	0.32	-7.67029	-4.42504	-5.77356	-7.04472	-4.74939	-6.13934	-4.70725	-4.48559	-5.6244	-5.47116	-6.29666	-9.32176	-4.47487	-6.98677	-9.38563	-5.12262	-6.31672	-2.1661	-6.63893	-4.73209	-6.08303
	0.33	-8.656	-4.15343	-5.64692	-7.45061	-4.94715	-5.92083	-5.01242	-4.716	-5.81292	-5.62833	-6.13034	-9.79173	-4.47029	-6.90284	-8.67305	-5.80011	-6.86174	-2.29183	-6.43629	-4.60514	-6.1447
	0.34	-7.33307	-3.96117	-5.51569	-6.63884	-5.41345	-5.40569	-4.66757	-5.03949	-5.49687	-5.46964	-6.50571	-9.58624	-4.5771	-6.90895	-9.50007	-5.04175	-6.41934	-2.55184	-6.45338	-4.67472	-6.15352
	0.35	-8.40729	-4.06646	-5.38294	-6.76244	-5.16077	-5.81951	-5.07804	-5.32483	-5.75028	-5.46048	-6.18832	-9.77138	-4.58321	-7.03102	-8.43959	-5.32404	-6.38612	-2.38705	-6.53761	-4.77116	-6.08
	0.36	-8.125	-4.42046	-5.27918	-7.20647	-4.6908	-5.6889	-4.69199	-4.91894	-5.62772	-5.59934	-6.43552	-9.75511	-4.79836	-6.90132	-8.57997	-5.26148	-6.49982	-2.45296	-6.17384	-4.47575	-6.08486
	0.37	-7.47345	-4.14123	-5.54773	-6.97301	-5.02405	-5.68035	-4.89493	-4.73279	-5.55844	-5.41623	-5.99301	-9.48248	-5.00588	-6.76246	-8.67	-5.31488	-6.39606	-2.5555	-6.44728	-4.64665	-6.06277
	0.38	-9.02679	-4.35485	-5.18305	-7.33006	-4.68836	-5.9782	-4.44785	-5.08679	-5.76199	-5.54441	-6.41568	-9.61473	-4.32991	-6.93794	-9.07588	-5.08753	-6.39742	-2.66292	-6.60719	-4.91886	-6.14477
	0.39	-9.24347	-3.90014	-5.17084	-6.88603	-4.33924	-6.01849	-4.09079	-4.99371	-5.58034	-5.50168	-6.02963	-9.38076	-4.91127	-6.8296	-8.96449	-5.55902	-6.22064	-2.57748	-6.44118	-4.19743	-6.05574
	0.4	-8.77502	-4.34112	-5.48517	-6.7487	-4.52844	-5.88177	-4.67978	-5.02118	-5.68265	-5.60849	-6.3577	-9.45603	-4.66103	-6.22535	-8.96602	-5.0799	-6.54074	-2.6617	-6.46681	-4.48795	-6.04652
	0.41	-8.28674	-4.03899	-5.58893	-7.25987	-4.79212	-6.42254	-5.38931	-4.95557	-5.84176	-5.45743	-5.89383	-9.20579	-4.22768	-6.63124	-9.81288	-4.81592	-6.35582	-2.36385	-6.04079	-4.20475	-5.91
	0.42	-7.77557	-4.04968	-5.1037	-7.72069	-4.28186	-5.53509	-4.27542	-4.61529	-5.41966	-5.17972	-6.17917	-9.73883	-4.9128	-6.1338	-8.62117	-5.11499	-6.42816	-2.05135	-5.74293	-4.77604	-5.89809
	0.43	-8.28674	-4.24651	-5.84375	-7.52385	-4.04871	-6.1137	-4.8812	-4.43371	-5.67227	-5.45438	-6.34702	-9.69814	-4.85939	-7.26448	-8.61354	-4.94562	-6.58889	-2.29671	-6.16408	-4.56364	-6.07235
	0.44	-8.79181	-4.3991	-5.73542	-6.76854	-4.66516	-5.57781	-4.71793	-4.39252	-5.63104	-5.66037	-6.3226	-9.72052	-4.96926	-6.59309	-8.87752	-4.68012	-6.52876	-2.39681	-6.03346	-4.36832	-6.01371
	0.45	-8.40118	-3.93523	-5.29139	-6.36571	-5.22303	-6.08929	-4.85068	-4.91589	-5.63405	-5.50779	-6.38669	-10.4123	-4.99977	-6.17195	-8.60896	-5.58039	-6.05381	-2.61043	-6.17262	-4.70524	-6.11
	0.46	-8.63312	-4.10613	-5.5401	-6.77464	-4.69812	-5.96111	-4.85526	-5.2348	-5.72541	-5.37046	-5.94266	-9.88125	-5.50179	-6.87995	-8.44417	-5.43543	-6.45484	-2.51156	-5.83205	-4.36344	-6.05615
	0.47	-9.2633	-3.96117	-5.10675	-7.85191	-5.37561	-5.52898	-4.75608	-4.18652	-5.75379	-5.69394	-5.94266	-9.31769	-5.06233	-6.45118	-9.00111	-5.01734	-6.20618	-2.39315	-6.31666	-4.70158	-6.00944
	0.48	-8.302	-4.0451	-5.29902	-7.00505	-4.76282	-6.09905	-5.07956	-4.76483	-5.66968	-5.77176	-6.11966	-8.98403	-4.21395	-6.36573	-8.34041	-5.263	-6.19058	-2.51766	-6.20802	-4.56608	-5.86735
	0.49	-8.38592	-3.75976	-5.4867	-7.25835	-4.09265	-5.98553	-5.11466	-4.60156	-5.58564	-5.62223	-6.31345	-10.046	-5.42244	-7.00202	-8.96754	-5.33014	-6.52039	-2.59457	-6.38136	-4.24747	-6.22251
	0.5	-8.82996	-4.15038	-5.71711	-7.06914	-4.98133	-5.4948	-4.83237	-5.34924	-5.80304	-5.29874	-5.89536	-9.31972	-4.77089	-6.6999	-9.3246	-4.54889	-6.18854	-2.41146	-6.14943	-4.43302	-5.91278
	0.51	-8.07007	-3.88641	-5.25324	-7.81377	-4.15125	-5.87078	-4.35629	-4.97693	-5.54734	-5.46811	-6.16544	-9.19969	-5.59029	-6.46797	-8.34803	-5.22791	-6.41595	-2.46761	-6.14577	-4.80045	-6.02702
	0.52	-9.37622	-3.63769	-5.6225	-6.67241	-5.27063	-5.7365	-5.00632	-4.52069	-5.73037	-5.49558	-6.25089	-9.03286	-4.99672	-7.53303	-8.43043	-4.90442	-6.14469	-2.32235	-5.77345	-4.2841	-5.92441
	0.53	-8.01514	-3.95507	-5.55231	-7.68102	-5.75037	-5.31536	-5.39847	-4.74652	-5.80178	-5.1843	-5.60696	-8.68496	-5.55824	-6.64192	-8.45637	-5.61853	-6.45167	-2.47249	-6.25197	-4.62833	-5.95961
	0.54	-8.74298	-3.95507	-4.95722	-7.70238	-5.24134	-5.8305	-4.62027	-4.80145	-5.7314	-5.47727	-6.25241	-9.86294	-5.09895	-6.47102	-8.52351	-4.88611	-6.22449	-2.56527	-6.01637	-4.18888	-5.96066
	0.55	-9.25568	-3.81774	-5.80256	-6.39623	-4.81531	-5.85979	-4.79575	-5.03796	-5.72263	-5.67563	-6.1456	-9.82835	-4.90517	-6.23451	-8.67457	-5.62006	-6.46456	-2.45296	-6.02858	-4.22672	-6.02334
	0.56	-8.65448	-3.89404	-5.54773	-7.27513	-4.96057	-6.04168	-5.79367	-4.88843	-5.88197	-5.50473	-6.08762	-9.26479	-4.99062	-6.9181	-8.54335	-5.29199	-6.61579	-2.25155	-5.98952	-4.30973	-5.97889
	0.57	-9.59137	-4.3457	-5.55994	-7.43077	-4.61389	-6.02337	-4.43564	-4.81976	-5.85255	-5.23771	-6.25546	-9.37669	-4.99977	-6.47865	-7.96657	-4.43445	-6.41008	-2.55062	-6.21168	-4.62345	-5.86774
	0.58	-9.1336	-3.73382	-5.18	-7.12254	-4.63831	-5.83294	-5.18332	-5.09289	-5.73968	-5.33384	-6.15781	-9.47231	-4.94484	-6.7884	-8.80885	-6.08087	-6.18425	-1.96712	-5.90529	-4.49039	-6.01218
	0.59	-8.51562	-4.24194	-5.35242	-7.24461	-4.98377	-5.85369	-5.05515	-4.77399	-5.75265	-5.61612	-6.36838	-10.0827	-4.96315	-7.30415	-8.97212	-5.14246	-6.32327	-2.19418	-6.27272	-4.38419	-6.14759
	0.6	-9.19311	-4.34264	-5.4043	-7.30107	-5.26941	-5.51189	-4.71945	-4.40167	-5.76794	-5.47422	-5.82669	-10.0196	-4.88533	-6.97303	-8.9767	-5.66126	-6.26224	-2.16	-5.94069	-4.4025	-6.05293
	0.61	-8.9505	-4.23888	-5.69574	-6.6953	-5.37073	-5.6181	-4.98801	-4.78161	-5.79236	-5.63443	-6.01437	-9.06744	-5.32936	-6.87995	-8.01997	-5.42169	-6.35515	-2.53231	-5.81496	-4.54655	-5.96511
	0.62	-8.04871	-4.20379	-6.00855	-7.54521	-4.63831	-5.81341	-4.69962	-4.77093	-5.71607	-5.35672	-5.93655	-9.97076	-4.78615	-7.47657	-8.36177	-5.44001	-6.48264	-2.40169	-6.39967	-4.81632	-6.1299
	0.63	-8.7323	-3.76281	-5.70948	-7.38957	-5.06433	-5.91106	-5.08261	-4.72363	-5.79697	-5.38724	-5.73361	-9.25055	-5.65437	-6.6999	-8.90345	-5.3805	-6.04613	-2.35775	-6.19215	-4.86881	-6.04313
	0.64	-8.75976	-4.23583	-4.90076	-7.07982	-3.87171	-6.09295	-4.87662	-5.30957	-5.64088	-5.37961	-5.94724	-9.25258	-5.16304	-6.20704	-9.90596	-4.99597	-6.3027	-2.3077	-5.80885	-4.75407	-6.00225
	0.65	-8.91846	-4.06036	-5.72168	-7.4796	-4.87635	-5.99407	-5.44882	-4.85486	-5.91927	-5.09732	-5.91367	-8.80092	-4.16817	-6.58699	-8.46553	-5.06616	-6.11372	-3.08407	-6.19337	-4.51237	-5.81839
	0.66	-8.26233	-4.15343	-6.03754	-7.37126	-4.46741	-5.67913	-5.18027	-5.32635	-5.80971	-5.53525	-6.6232	-8.67072	-5.20577	-6.86622	-8.72645	-5.67652	-6.39357	-2.42	-5.61842	-4.5612	-6.02703
	0.67	-8.90472	-4.15801	-5.21662	-7.26903	-5.33167	-5.99651	-5.14365	-5.53998	-5.94502	-5.24991	-5.59171	-9.27496	-4.75868	-7.34992	-7.64155	-4.35358	-6.25704	-2.5079	-6.02492	-4.82243	-5.80296
	0.68	-8.43933	-4.09393	-5.41956	-7.46434	-4.24402	-6.17229	-5.30387	-4.41998	-5.69466	-5.38877	-5.76413	-9.12238	-4.748	-6.74568	-9.25441	-5.85047	-6.39584	-2.17586	-5.35963	-4.51359	-5.93807
	0.69	-8.45611	-4.32739	-4.94959	-7.36516	-4.74451	-5.62542	-5.08109	-4.44592	-5.6244	-5.11563	-5.99301	-9.47028	-5.22713	-6.79298	-8.72188	-5.15314	-6.40104	-2.33456	-5.36085	-4.16325	-5.88489
	0.7	-8.83606	-4.02831	-5.40125	-6.88603	-4.67249	-6.0136	-4.98038	-5.18902	-5.75089	-5.52762	-6.1807	-8.82941	-4.77699	-5.99189	-8.98433	-5.18518	-6.08863	-2.58846	-6.04811	-4.17423	-5.85232
	0.71	-9.11987	-4.08477	-5.57062	-7.46739	-4.67981	-6.02337	-5.46256	-4.99066	-5.92488	-5.56119	-5.89688	-9.2241	-4.63661	-6.24061	-8.15272	-5.34693	-6.21296	-2.41268	-6.20924	-4.52213	-5.856
	0.72	-8.10516	-4.10003	-5.21967	-7.21104	-5.00818	-6.12713	-5.41678	-4.83807	-5.75326	-5.62375	-6.00369	-9.61676	-4.96315	-7.3896	-8.58149	-4.97766	-6.27264	-2.07088	-6.48146	-4.30851	-6.02633
	0.73	-8.40729	-4.50591	-5.54926	-7.18358	-5.12171	-5.81219	-5.04904	-4.96167	-5.82383	-5.32621	-6.01437	-8.83551	-5.42854	-6.12159	-7.80482	-4.70148	-6.17317	-2.26864	-6.16652	-4.4965	-5.75794
	0.74	-8.62091	-4.21905	-5.29902	-7.00658	-5.16687	-5.46185	-4.31052	-4.90979	-5.62432	-5.44675	-6.11356	-9.27293	-5.54604	-5.88203	-9.23457	-4.73047	-6.21703	-2.70809	-5.94557	-4.51725	-5.96494
	0.75	-9.36401	-3.95049	-5.57978	-7.30412	-5.50623	-6.06731	-4.78049	-5.12036	-5.9591	-5.16141	-5.92435	-9.60659	-5.17983	-6.24214	-8.00776	-4.62976	-6.13203	-2.38583	-5.77711	-4.47453	-5.77467
	0.76	-8.93829	-4.45708	-5.54926	-6.51067	-4.63343	-5.67547	-5.06735	-4.95862	-5.72377	-5.40403	-6.1929	-9.05931	-5.21492	-7.1302	-7.92994	-5.48426	-5.89399	-2.1954	-6.38258	-4.5319	-5.94722
	0.77	-7.33917	-4.00848	-5.40125	-7.2263	-4.88367	-6.09661	-5.49765	-5.09289	-5.69325	-5.4849	-6.22037	-8.79075	-5.49263	-7.17292	-7.86738	-5.03717	-6.12841	-2.33456	-6.09328	-4.53068	-5.923
	0.78	-8.97797	-3.75823	-5.51111	-7.31938	-4.45154	-5.55706	-4.80185	-4.7923	-5.64618	-5.26212	-5.74887	-10.0216	-4.87007	-5.998	-9.28798	-5.28437	-6.21228	-2.25765	-5.23024	-4.35978	-5.86663
	0.79	-7.51465	-4.43725	-5.357	-7.0432	-4.29773	-5.75726	-4.69657	-4.68548	-5.47364	-5.45591	-6.03269	-9.18748	-4.43215	-7.67188	-8.96602	-5.12567	-6.21476	-2.33211	-5.58913	-4.69669	-5.97314
	0.8	-8.94897	-4.13818	-5.51569	-7.87022	-5.11072	-5.8305	-4.63248	-4.59241	-5.8299	-5.22245	-5.56882	-9.70628	-4.70833	-6.41609	-8.22139	-5.30878	-6.24506	-2.43465	-5.99562	-4.42326	-5.84098
	0.81	-9.35028	-4.38232	-5.67438	-6.71666	-4.87635	-5.83904	-4.82779	-4.71905	-5.79823	-5.21787	-6.39279	-9.45197	-4.58168	-7.27363	-8.55555	-5.54529	-6.28032	-2.31869	-5.46461	-4.23283	-5.93775
	0.82	-9.21753	-4.35332	-5.3631	-7.45976	-4.67615	-5.53875	-5.03379	-4.65649	-5.78736	-5.24839	-6.00827	-8.7643	-4.98909	-6.8708	-8.86683	-5.02954	-6.27693	-2.41756	-6.05543	-4.47208	-5.90902
	0.83	-8.96576	-4.25109	-5.48517	-7.30717	-4.16467	-6.22478	-5.92795	-4.65649	-5.87289	-5.314	-5.73514	-9.15493	-4.92195	-5.81336	-9.68013	-5.1745	-5.95571	-2.37362	-5.15089	-4.22916	-5.77304
	0.84	-8.64075	-4.40826	-5.77356	-7.60167	-5.28162	-6.20159	-5.31455	-5.06848	-6.03631	-5.43149	-5.6619	-9.68593	-5.38277	-7.66731	-8.74019	-5.30268	-6.08682	-2.53963	-5.72829	-4.49528	-6.06566
	0.85	-9.40369	-4.23125	-5.54621	-7.0966	-4.86292	-6.09783	-4.57602	-4.47796	-5.78656	-5.40097	-5.55661	-9.3889	-4.93111	-6.60072	-8.70814	-5.14093	-6.07846	-2.52376	-5.62453	-4.27555	-5.83906
	0.86	-9.06952	-3.56597	-5.26087	-7.02184	-4.90442	-5.91961	-5.47476	-5.3233	-5.81754	-5.30027	-5.96555	-9.06338	-4.80599	-6.67091	-8.32362	-5.04175	-6.09066	-2.42611	-5.96998	-3.72623	-5.76222
	0.87	-8.97797	-4.00085	-4.79853	-7.65202	-4.50281	-5.77068	-4.96207	-5.03796	-5.71286	-5.0073	-5.95639	-8.72361	-4.62593	-7.03102	-8.81495	-4.73047	-5.89331	-2.52621	-6.09572	-4.33048	-5.79413
	0.88	-9.26941	-4.27551	-5.32801	-7.80766	-4.5614	-5.94646	-5.67618	-4.27045	-5.89189	-5.1492	-6.03116	-9.26683	-5.06081	-7.83363	-9.68013	-5.17908	-5.78096	-2.48592	-6.06154	-4.26212	-6.07194
	0.89	-8.71399	-3.86657	-5.42566	-7.24767	-5.19251	-5.81951	-4.4982	-5.05627	-5.72755	-5.34604	-5.85111	-9.35838	-5.19814	-6.83723	-8.79512	-4.96546	-6.09608	-2.03915	-6.07374	-4.52457	-5.91682
	0.9	-8.96576	-4.21294	-5.18	-6.825	-4.76038	-5.87933	-5.02616	-5.25159	-5.76265	-5.25754	-5.82669	-9.37465	-5.25307	-7.43995	-9.59468	-5.63227	-6.02601	-2.12948	-5.62575	-4.38541	-6.04959
	0.91	-9.08935	-3.88641	-5.74915	-6.77007	-5.24744	-5.83172	-4.91629	-4.96319	-5.8067	-5.00882	-5.84348	-8.85992	-5.17983	-6.38557	-8.97975	-4.88153	-6.11824	-2.39925	-5.97975	-4.22794	-5.80583
	0.92	-8.74298	-4.3106	-5.45771	-6.83873	-4.53821	-5.65838	-5.54495	-4.87012	-5.74521	-5.21482	-5.7916	-8.90875	-4.69307	-6.51679	-8.27937	-5.3866	-5.96113	-2.41878	-5.74904	-4.55875	-5.77079
	0.93	-8.50647	-3.66973	-4.9679	-6.99742	-5.10584	-5.62054	-5.11771	-4.85943	-5.60563	-5.07749	-5.491	-9.2302	-4.58473	-6.33979	-8.82564	-5.41559	-6.28416	-2.31747	-5.50612	-4.3317	-5.76399
	0.94	-8.58276	-3.94592	-5.4928	-7.24919	-4.74939	-5.9074	-4.76218	-4.46576	-5.64443	-5.01798	-6.0159	-9.43569	-5.40566	-7.1775	-8.05201	-5.90387	-6.09541	-2.4847	-5.75026	-4.31706	-5.96873
	0.95	-8.42712	-4.18243	-5.14032	-7.27666	-4.46497	-5.7243	-5.61209	-4.47186	-5.66247	-5.48642	-5.7916	-8.72158	-5.19203	-7.18818	-8.5525	-5.11957	-5.9166	-1.75472	-6.407	-4.35734	-5.8625
	0.96	-9.05121	-4.30144	-5.46228	-6.68309	-4.36975	-5.14202	-4.66757	-5.02881	-5.58827	-5.29264	-5.71072	-8.96979	-4.35127	-5.89576	-9.33375	-5.48883	-5.87026	-2.3785	-5.80275	-4.40739	-5.77288
	0.97	-8.12958	-4.46014	-5.0976	-7.356	-4.75427	-5.75726	-5.22605	-4.13159	-5.61406	-5.23618	-5.81143	-9.23631	-5.06496	-6.30928	-9.02705	-4.94409	-5.94033	-2.45052	-5.70143	-3.9362	-5.78707
	0.98	-8.83148	-4.02679	-5.28223	-7.21715	-4.69202	-6.26019	-4.41275	-4.48102	-5.65045	-5.38877	-6.24326	-9.09186	-5.12337	-6.07276	-8.94618	-5.01276	-6.06376	-2.17831	-5.58668	-4.5734	-5.84374
	0.99	-9.68597	-3.77349	-6.25422	-7.34685	-4.30261	-5.94646	-5.03073	-5.01965	-5.92	-5.25296	-5.97165	-8.37164	-5.68947	-6.73652	-8.51436	-5.0799	-6.23353	-2.40047	-5.86989	-4.1132	-5.83942
	1	-8.24707	-3.89098	-5.6225	-6.60832	-4.70301	-5.76458	-5.08567	-4.88537	-5.60094	-5.4498	-5.83585	-8.5283	-5.20424	-7.18513	-7.47371	-5.1745	-6.11575	-2.34798	-5.60133	-4.2902	-5.74607
	1.05	-9.18396	-4.42962	-6.59906	-6.97148	-5.24622	-6.143	-5.57852	-5.91839	-6.25878	-6.67051	-7.69437	-11.2138	-5.77645	-8.81477	-11.1648	-6.21668	-9.7678	-3.49422	-8.24293	-6.15543	-7.74652
	1.1	-9.19159	-5.50994	-6.7074	-7.80919	-6.50354	-6.31268	-6.80228	-7.89288	-7.09119	-7.18473	-8.74722	-11.7774	-6.44478	-9.02534	-11.7843	-6.07782	-11.3486	-4.36703	-9.97023	-6.95011	-8.51614
	1.5	-11.2958	-6.34002	-8.96875	-9.43578	-7.87561	-8.2243	-8.45481	-9.79718	-8.79903	-9.37284	-10.4989	-13.8445	-7.68685	-12.2388	-16.5161	-9.47138	-13.764	-8.11947	-13.6824	-10.1007	-11.3905
	2	-12.5653	-8.46252	-11.4239	-10.9708	-9.08045	-9.4986	-11.8667	-11.6816	-10.6937	-10.4318	-12.0711	-15.0295	-9.97895	-16.9202	-21.173	-13.1259	-14.7182	-12.6019	-15.4658	-12.2382	-13.9777
	3	-13.6868	-9.44823	-12.492	-12.0527	-10.1498	-10.4495	-12.7761	-12.3744	-11.6787	-11.0284	-12.6189	-15.8962	-13.8013	-21.4887	-23.5031	-13.106	-16.118	-13.8995	-17.2688	-12.6862	-15.5832
	6	-14.1354	-10.6842	-13.5311	-12.4631	-10.6283	-11.9168	-14.5095	-13.6577	-12.6908	-11.95	-13.9205	-16.8483	-13.7919	-22.5858	-26.3656	-16.9345	-17.3407	-15.3741	-20.3218	-14.8008	-17.294
	11	-15.17	-11.3342	-14.7625	-13.043	-11.5866	-12.1707	-14.6285	-14.6846	-13.4225	-12.3681	-14.7811	-18.0385	-15.0752	-25.2836	-27.6504	-18.4146	-17.595	-16.7913	-21.6817	-16.472	-18.5592
	21	-15.1639	-11.2625	-14.8709	-13.5602	-11.6964	-12.775	-14.8162	-13.9293	-13.5093	-12.5177	-15.1335	-18.4983	-16.8833	-24.6503	-29.1671	-19.2156	-17.1291	-17.3663	-22.2725	-16.7393	-19.0521
	31	-15.1044	-11.2137	-14.8831	-13.4031	-11.8453	-12.1903	-14.9322	-13.6302	-13.4003	-12.5558	-15.0466	-18.6183	-15.9068	-24.8594	-28.3065	-18.6404	-16.3173	-17.3736	-21.9795	-16.9236	-18.7753
