# Supplementary material for: Kv3.3 subunits control presynaptic action potential waveform and neurotransmitter release at a central excitatory synapse
Source: eLife. 2022 May 5;11:e75219. doi: 10.7554/eLife.75219 (PMC9110028; doi:10.7554/eLife.75219)
Supplement: Figure 7—source data 1. [file elife-75219-fig7-data1.xlsx]

## Sheet: Figure 7
Figure 7A		Firing success at 600 Hz (%)				Figure 7C		Phase I duration (ms)															Figure 7D		Phase duration at 600 Hz (ms)											Figure 7F		Plateau amplitude (mV)
Is firing in the MNTB neuron affected by the lack of Kv3 subunits in the synaptic terminal?		WT	Kv3.3KO	Kv3.1KO		What is the firing pattern in the 3 genotypes?	Frequency(Hz)	WT															What is the duration of the 3 phases at 600 Hz?	Phase	WT											Is the amplitude of the plateau observed in the AP train of the Kv3.1KO animals statistically significant from the other genotypes?	Frequency (Hz)	WT
		40.2083	13.1944	32.1528			100	800	800	800	800	800	800	800	800	800	800	800	800					1	34.6667	27.8333	36.3333	53	39.6667	50.6667	33.6667	24	10.3333	33			100	1	-7.33333	0	-4	-6	4.33333			0	-2	0
		50	28.6806	55.7639			200	800	800	800	800	800	800	800	800	800	800	800						2	369	637.833	506.667	462	760.333	148	715.667	173.667	605.333	382			200	0	-10	2	1.33333		4.33333			4	2.33333	-7.5
		52.5694	47.9167	32.3611			300	800	800	800	405.667	572.667	78	800										3	368.333	134.333	257	285	0	601.333	50.6667	602.333	184.333	385			300	0	-8							7.66667
		60.4861	35.2083	32.5			400	511.5	143.333	322.667	313.667	438	218	100	165	49	170	27		542.667	518.667			Phase	Kv3.3KO												400	1			14		17.3333			10.3333	9
		59.1667	25.9028	23.4722			600	34.6667	27.8333	36.3333	53	39.6667	50.6667	33.6667	24	10.3333								1	28.3333	24	37	15.6667	15	27.5							600				17		20.6667			16.6667
			27.7778	41.5278			Frequency(Hz)	Kv3.3KO																2	727.667	776	763	784.333	785	772.5							Frequency (Hz)	Kv3.3KO
			29.9306				100	800	800	800	800	800	800	800	800	800	800	800	800	800				3	44	0	0	0	0	0							100	2	0	-2	-1	0	-2	-3	-3		0	-2	-1
							200	800	800	800	800	800	800	800	800	800	800	800						Phase	Kv3.1KO												200	6	-2	-1	-1	-2	0		-4		-3	-2	0
	Mean	52.4861	29.8016	36.2963			300	800	800	800	221.333	731	800	800	800									1	15.3333	42.0467	25.3333	37	9								300			1	-2	4	5.5				0	2	0
	SD	8.14803	10.4384	11.1165			400	225.713	74	644.333	36	112.667	60.6667	196.333										2	650.667	757.953	198	763	488.333								400			6.66667	-1	12	10				5		3.33333
							600	28.3333	24	37	15.6667	15	27.5											3	134	0	576.667	0	302.667								600			15	6.66667	16.3333	10				13.6667		12
	p value vs WT		0.0044	0.046			Frequency(Hz)	Kv3.1KO																Normalised (%)													Frequency (Hz)	Kv3.1KO
							100	800	800	800	800	800	800	800	800									Phase	WT												100	5	2	2				3.66667	2
							200	800	800	800	800	800	800	800										1	4.33333	3.47917	4.54167	6.625	4.95833	6.33333	4.20833	3	1.29167	4.125			200	8	8	6	3	12	16	14	6.66667
							300	800	800	800	800	55.76	800	98.6667	252.667	94								2	46.125	79.7292	63.3333	57.75	95.0417	18.5	89.4583	21.7083	75.6667	47.75			300		12	4		18	18	25.3333	15.3333
							400	385	800	800	15.5	71.6667	58.3333	48										3	46.0417	16.7917	32.125	35.625	0	75.1667	6.33333	75.2917	23.0417	48.125			400			9.66667	11.6667	24		29	18
							600	15.3333	42.0467	25.3333	37	9												Phase	Kv3.3KO												600			16.5333	15	23		35.3333
							Normalised (%)																	1	3.54167	3	4.625	1.95833	1.875	3.4375
							Frequency(Hz)	WT																2	90.9583	97	95.375	98.0417	98.125	96.5625
							100	100	100	100	100	100	100	100	100	100	100	100	100					3	5.5	0	0	0	0	0
							200	100	100	100	100	100	100	100	100	100	100	100						Phase	Kv3.1KO
							300	100	100	100	50.7083	71.5833	9.75	100										1	1.91667	5.25583	3.16667	4.625	1.125
							400	63.9375	17.9167	40.3333	39.2083	54.75	27.25	12.5	20.625	6.125	21.25	3.375		67.8333	64.8333			2	81.3333	94.7442	24.75	95.375	61.0417
							600	4.33333	3.47917	4.54167	6.625	4.95833	6.33333	4.20833	3	1.29167								3	16.75	0	72.0833	0	37.8333
							Frequency(Hz)	Kv3.3KO
							100	100	100	100	100	100	100	100	100	100	100	100	100	100
							200	100	100	100	100	100	100	100	100	100	100	100
							300	100	100	100	27.6667	91.375	100	100	100
							400	28.2142	9.25	80.5417	4.5	14.0833	7.58333	24.5417
							600	3.54167	3	4.625	1.95833	1.875	3.4375
							Frequency(Hz)	Kv3.1KO
							100	100	100	100	100	100	100	100	100
							200	100	100	100	100	100	100	100
							300	100	100	100	100	6.97	100	12.3333	31.5833	11.75
							400	48.125	100	100	1.9375	8.95833	7.29167	6
							600	1.91667	5.25583	3.16667	4.625	1.125
[truncated: 19 more columns]
