# Supplementary material for: Kv3.3 subunits control presynaptic action potential waveform and neurotransmitter release at a central excitatory synapse
Source: eLife. 2022 May 5;11:e75219. doi: 10.7554/eLife.75219 (PMC9110028; doi:10.7554/eLife.75219)
Supplement: Figure 8—source data 1. [file elife-75219-fig8-data1.xlsx]

## Sheet: Figure 8
Figure 8
How does the lack of Kv3.3 affect responses to sound?
		WT (n=25)										Kv3.3KO (n=19)
		not all measures were taken from all neurons										not all measures were taken from all neurons
		preAP HW (ms)	synaptic delay (ms)	postAP HW (ms)	FSL (ms)	Jitter (ms)	peak rate (Hz)	Spont. Rate (Hz)	SNR			preAP HW (ms)	synaptic delay (ms)	postAP HW (ms)	FSL (ms)	Jitter (ms)	peak rate (Hz)	Spont. Rate (Hz)	SNR
		0.127	0.345	0.229	2.343	0.049	180	1	2.36			0.134	0.384	0.379	2.478	0.212	120	1	1.99
		0.148	0.371	0.255	2.6	0.068	180	1	2.42			0.153	0.401	0.4	2.497	0.234	160	3.9	1.46
		0.148	0.393	0.274	2.698	0.074	200	1	2.66			0.153	0.438	0.474	3.125	0.497	160	11.4	2.06
		0.153	0.408	0.289	2.953	0.078	200	1.8	4.35			0.168	0.459	0.492	3.558	0.568	180	13.4	2.36
		0.157	0.409	0.289	2.98	0.082	200	2.8	4.39			0.19	0.474	0.634	3.607	0.604	180	19.3	2.6
		0.159	0.415	0.311	3.01	0.092	200	4	4.52			0.19	0.518	0.635	3.703	0.675	200	24	1.69
		0.166	0.43	0.311	3.014	0.103	260	6	5.59			0.25	0.563	0.642	3.962	0.695	220	27	2.93
		0.166	0.43	0.317	3.039	0.108	300	6	9			0.25	0.584	0.77	4.028	0.714	240	30	4.22
		0.167	0.43	0.319	3.15	0.115	300	6	9.23			0.262	0.591	0.795	4.058	0.777	240	39.6	2.37
		0.17	0.432	0.326	3.255	0.141	340	6.67	10.17			0.284	0.62	0.802	4.059	1.057	240	40	4.52
		0.17	0.45	0.389	3.282	0.158	340	10	16.84			0.328	0.788	0.839	4.774	1.141	240	43.96	3.05
		0.177	0.46	0.393	3.349	0.162	340	13	21.27			0.375	0.829	1	5.488	1.164	260	44	3.92
		0.178	0.47	0.412	3.442	0.177	360	20	24.13			0.416	0.918	1.006	5.667	1.458	260	52	3.41
		0.18	0.471	0.424	3.545	0.195	360	22	28.67						6.467	1.489	260	58	9
		0.18	0.492	0.451	3.694	0.31	380	30	77.8						6.656	1.548	280	62.6	10.21
		0.193	0.494	0.458	3.734	0.359	400	34	91.47						8.916	1.554	280	83.75
		0.197	0.498	0.48	3.83	0.369	420	38	92.67						9.066	1.762	320	99
		0.197	0.504	0.499	3.858	0.387	440	41	110						11.635	2.785	340	118.3
		0.198	0.533	0.502	4.199	0.5	440	43.33										140
		0.215	0.545	0.512	4.219	0.51	520	50
					4.259	0.579	520	62
					4.418	0.676	720	72
					4.58	0.757		79
					4.684	0.758		116
					4.968	0.873
