# Supplementary material for: Kv3.3 subunits control presynaptic action potential waveform and neurotransmitter release at a central excitatory synapse
Source: eLife. 2022 May 5;11:e75219. doi: 10.7554/eLife.75219 (PMC9110028; doi:10.7554/eLife.75219)
Supplement: Supplementary file 1. — Data are presented in the same order as figures appear in the article. Details are provided about the number of animals, number of cells, statistical test used and calculated p values. [file elife-75219-supp1.xlsx]

## Sheet: Summary statistics
Statistical summary table
	Figure number	Description	Number of cells	Number of animals	Statistical test (red=significant)	Comparison and P value (** indicates significant comparisons)	Average +/- SD	Median and quartiles	Comments
Presynaptic	1A	Presynaptic IV +/- TEA	WT - 7 TEA - 6	WT - 4 TEA - 5	Two-tailed unpaired t-test. t=2.375, dF = 11, P=0.0392.	**WT vs 1mM TEA P=0.0392	WT 9.37± 2.61 nA. 1mM TEA 6.68 ± 0.94 nA		Mice age range: P10-P12
	1E-I	Presynaptic AP parameters - WT, 1mM TEA, Kv3.3 KO and Kv3.1 KO	WT- 9 TEA - 7 Kv3.3KO - 6 KV3.1KO - 5	WT - 6 TEA - 5 Kv3.3KO - 3 KV3.1KO - 3	One way ANOVAs with Tukey's post hoc for multiple comparisons.
					ANOVA Half-width F(3,24)=26.86. P=<0.0001	Multiple comparisons **WT vs 1 mM TEA P=<0.0001 : **WT vs Kv3.3KO P=0.0001 : WT vs Kv3.1KO P=0.5316 : 1mM TEA vs Kv3.3KO P=0.0751 : **1mM TEA vs Kv3.1KO P=<0.0001 **Kv3.3 KO vs Kv3.1KO P=0.0178	WT 0.28 ± 0.017 ms. 1mM TEA 0.51 ± 0.10 ms. Kv3.3KO 0.43 ± 0.032 ms Kv3.1KO 0.32 ± 0.023 ms
					Amplitude F(3,24)=5.563 P=0.0048	**WT vs 1 mM TEA P=0.0458: WT vs Kv3.3 KO P=0.9935 : WT vs Kv3.1 KO P=0.3354 : 1mM TEA vs Kv3.3 KO P=0.1423 : **1mM TEA vs Kv3.1 KO P=0.0030 : Kv3.3 KO vs Kv3.1 KO P=0.3068	WT 39.86 ± 4.81 mV. 1mM TEA 47.13±6.95 mV. Kv3.3 KO 40.58 ± 3.66 mV. Kv3.1 KO 34.90 ± 5.03 mV
					Rise slope F(3,24)=0.7903 P=0.5112	ns	WT 226 ± 35.16 mV/ms. 1mM TEA 235.30 ± 59.91. mV/ms Kv3.3 KO 198.70 ± 40.96 mV/ms. Kv3.1 KO 220.40 ± 41.15 mV/ms
					Decay slope F(3,24)=8.29 P=0.0006	**WT vs 1 mM TEA P=0.0016: **WT vs Kv3.3KO P=0.0042 : **WT vs Kv3.1KO P=0.0195 : 1mM TEA vs Kv3.3KO P=0.9975 : 1mM TEA vs Kv3.1KO P=0.9373 : Kv3.3KO vs Kv3.1KO P=0.9801	WT 99.30 ± 19.61 mV/ms 1mM TEA 60.00 ± 23.38 mV/ms. Kv3.3 KO 62.00 ± 12.55 mV.ms. Kv3.1 KO 66.40 ± 15.92 mV.ms
					Membrane resistance F(3,24)=0.7031 P=0.5595	ns	WT 229.6 ± 47.74. MΩ 1mM TEA 198 ± 62.40. MΩ Kv3.3 KO 222.7 ± 39.33 MΩ Kv3.1 KO 203 ± 42.56 MΩ
	Text only				AP threshold F(3,24)=0.1007 P=0.9588	ns	WT -45.92 ± 2.75 mV 1mM TEA 45.16 ± 3.45 mV Kv3.3 KO -46.05 ± 2.43 mV Kv3.1 KO -45.67 ± 2.16 mV
Cochlear nucleus mRNA sequencing	Text + Figure 1-figure supplement 1	mRNA levels	9 samples	27			Kcnc1 (Kv3.1) 54.7±20.8 FPKM; Kcnc2 (Kv3.2) 12.5±20 FPKM; Kcnc3 (Kv3.3) 89.5±21.8 FPKM; Kcnc4 (Kv3.4) 17.0±3.9. FPKM.
		% contribution to cochlear nucleus Kv3 mRNA	9 samples	27			Kcnc1 (Kv3.1) 30.3±9.1%; Kcnc2 (Kv3.2) 7.7±2.8%; Kcnc3 (Kv3.3) 52.0±6.0%; Kcnc4 (Kv3.4)and 10.0±1.6%
Cochlear nucleus staining	Figure 1-figure supplement 2		WT - 3 Kv3.3 KO - 2 KV3.1 KO - 2						The same observations were made in 3 animals for WT and 2 animals for each of the KOs.
Spiral ganglion cells staining	Figure 1-figure supplement 3		WT - 3 Kv3.3 KO - 2 KV3.1 KO - 2						The same observations were made in 3 animals for WT and 2 animals for each of the KOs.
AP width	Figure 1-figure supplement 4B	Presynaptic AP 50% width	WT- 9 TEA - 7 Kv3.3 KO - 6 KV3.1 KO - 5	WT - 6 TEA - 5 Kv3.3 KO - 3 KV3.1 KO - 3	ANOVA 50% AP width F(3,24)=26.86. P=<0.0001	Multiple comparisons **WT vs 1 mM TEA P=<0.0001 : **WT vs Kv3.3 KO P=0.0001 : WT vs Kv3.1 KO P=0.5316 : 1mM TEA vs Kv3.3 KO P=0.0751 : **1mM TEA vs Kv3.1 KO P=<0.0001 **Kv3.3 KO vs Kv3.1 KO P=0.0178	WT 0.28 ± 0.017 ms. 1mM TEA 0.51 ± 0.10 ms. Kv3.3 KO 0.43 ± 0.032 ms Kv3.1 KO 0.32 ± 0.023 ms		Mice age range P10-P12
	Figure 1-figure supplement 4C	Presynaptic AP 25% width			ANOVA 25% AP width F(3,24)=23.13. P=<0.0001	Multiple comparisons **WT vs 1 mM TEA P=<0.0001 : **WT vs Kv3.3 KO P=0.0317 : WT vs Kv3.1 KO P=0.8076	WT 0.39 ± 0.02 ms. 1mM TEA 0.83 ± 0.20 ms. Kv3.3 KO 0.57 ± 0.09 ms Kv3.1 KO 0.45 ± 0.04ms
	Figure 1-figure supplement 4D	Presynaptic AP 75% width			ANOVA 75% AP width F(3,24)= 52.94. P=<0.0001	Multiple comparisons **WT vs 1 mM TEA P=<0.0001 : **WT vs Kv3.3 KO P=0.0127 : WT vs Kv3.1 KO P=0.6080	WT 0.18 ± 0.01 ms. 1mM TEA 0.53 ± 0.11 ms. Kv3.3 KO 0.26 ± 0.04 ms Kv3.1 KO 0.20 ± 0.01ms
Expansion microscopy	2		WT - 3 Kv3.3KO - 3 KV3.1KO - 3						The same observations were made in 3 animals per genotype. Mice aged P28-P30
Single EPSC	3B-E	Single EPSC	WT - 21 Kv3.3KO - 21 KV3.1KO - 17	WT - 11 Kv3.3KO - 10 KV3.1KO - 8	One way ANOVAs with Tukey's posthoc for multiple comparisons.				Mice age range: P21-P25
					Amplitude F(2,56)=14.16 P=<0.0001	**WT vs Kv3.3KO P=<0.0001 : WT vs Kv3.1KO P=0.7795 : **Kv3.3KO vs Kv3.1KO P=0.0005	WT -13.08 ± 1.52 nA Kv3.3KO -17.93 ± 4.63 nA Kv3.1KO -13.78 ± 2.30 nA
					Rise time (10-90%) F(2,56)=1.701 P=0.1918	ns	WT 0.17 ± 0.010 ms Kv3.3KO 0.18 ± 0.039 ms. Kv3.1KO 0.17 ± 0.013 ms
					Decay tau. F(2,56)=7.008 P=0.0019	**WT vs Kv3.3KO P=0.0012. : WT vs Kv3.1KO P=0.1635 : Kv3.3KO vs Kv3.1KO P=0.2172	WT 0.17 ± 0.04 ms Kv3.3KO 0.23 ± 0.06 ms Kv3.1KO 0.20 ± 0.06 ms
					Charge (Area) F(2,56)=15.78 P=<0.0001	**WT vs Kv3.3KO P=<0.0001 : WT vs Kv3.1KO P=0.4686 : **Kv3.3KO vs Kv3.1KO P=0.0007	WT 5.53 ± 1.44 nA.ms Kv3.3KO 10.45 ± 4.43 nA.ms. Kv3.1KO 6.67 ± 1.87 nA.ms
	3F-H	EPSC +/- TEA	WT - 8 Kv3.3KO - 6 Kv3.1KO - 4	WT - 7 Kv3.3KO - 3 KV3.1KO - 3	Kruksal-Wallis ANOVA and Dunn's post hoc for multiple comparisons. Kruksal-Wallis statistic=11.17 Groups= 3 Values = 18. P=0.0005. (WT has non-gaussian distribution)	**WT vs Kv3.3KO P=0.0031 : WT vs Kv3.1KO P=>0.9999 : Kv3.3 KO vs Kv3.1 KO P=0.1000	Before and after TEA WT 12.30 ± 2.74 nA WT + 1mM TEA 18.69 ± 3.34 nA. Kv3.3KO 17.94 ± 5.28 nA Kv3.3KO + 1mM TEA 20.43 ± 6.31 nA. Kv3.1KO 14.16 ± 3.01 nA Kv3.1KO + 1mM TEA 19.32 ± 4.76 nA % increase in EPSC amplitude with TEA WT 160 ± 33 %. Kv3.3KO 114 ± 6 % Kv3.1KO 136 ± 11. %.
mEPSCs	Figure 3-figure supplement 1	mEPSC amplitude histograms	CBA WT - 900 events (9 neurons) Kv3.3 KO - 800 events (8 neurons). Kv3.1 KO 800 events (8 neurons) First 100 events were taken from each neuron to prevent skewing of data in CBA WT with two neurons that had many more events.	Control - 4 Kv3.3 KO - 4 Kv3.1 KO - 4			CBA WT 125.73 ± 41.58 pA Kv3.3 KO 99.26 ± 29.95 pA Kv3.1 KO 113.45 ± 45.45 pA		Mice age range P21-P25
		mEPSC average amplitude	CBA WT - 9. Kv3.3 KO. - 8 Kv3.1 KO. - 8	Control - 4 Kv3.3 KO - 4 Kv3.1 KO - 4	One-way ANOVA & Tukey's post hoc F(2,22)=4.282 P=0.0269	**CBA WT vs Kv3.3 KO P=0.0206 : CBA WT vs Kv3.1 KO P=0.4331 : Kv3.3 KO vs Kv3.1 KO P=0.2591	CBA WT -123.10 ± 21.17 pA Kv3.3 KO -96.05 ± 10 pA Kv3.1 KO -111.50 ± 22.95 pA
		mEPSC average frequency (per 1s during 30s recording period)	CBA WT - 9. Kv3.3 KO. - 8 Kv3.1 KO. - 8	Control - 4 Kv3.3 KO - 4 Kv3.1 KO - 4	Kruksal-Wallis ANOVA K-S statistic = 1.242 Groups = 3. Values = 25 P=0.5375 (CBA WT not normally distributed)	ns	CBA WT 14.73 ± 7.42 events/sec Kv3.3 KO 12.49 ± 5.18 events/sec Kv3.1 KO 10.49 ± 3.48 events/sec
		mEPSC Rise time (10-90%)	CBA WT - 9. Kv3.3 KO. - 8 Kv3.1 KO. - 8	Control - 4 Kv3.3 KO - 4 Kv3.1 KO - 4	One-way ANOVA F(2,22)=1.31 P=0.2899	ns	CBA WT 0.11 ± 0.01 ms Kv3.3 KO 0.12 ± 0.02 ms Kv3.1 KO 0.11 ± 0.02 ms
		mEPSC decay tau	CBA WT - 9. Kv3.3 KO. - 8 Kv3.1 KO. - 8	Control - 4 Kv3.3 KO - 4 Kv3.1 KO - 4	One-way ANOVA F(2,22)=0.4612 P=0.6365	ns	CBA WT 0.24 ± 0.03 ms Kv3.3 KO 0.27 ± 0.05 ms Kv3.1 KO 0.26 ± 0.09 ms
High frequency stimulation	4D	PPR EPSC2/EPSC1 -100Hz	WT - 21 Kv3.3KO - 21 KV3.1KO - 17	WT - 11. Kv3.3KO - 10 KV3.1KO - 8	One-way ANOVA & Tukey's post hoc F(2,56)=44.39 P=<0.0001	**WT vs Kv3.3KO P=<0.0001 : WT vs Kv3.1KO P=>0.6729 : **Kv3.3KO vs Kv3.1KO P=<0.0001	WT 0.90 ± 0.04 Kv3.3KO 0.75 ± 0.08 Kv3.1 KO 0.92 ± 0.06		Mice age range: P21-P25
		PPR EPSC80/EPSC1 -100Hz	WT - 21 Kv3.3KO - 21 KV3.1KO - 17	WT - 11 Kv3.3KO - 10 KV3.1KO - 8	Kruksal-Wallis ANOVA and Dunn's post hoc for multiple comparisons. Kruksal-Wallis statistic=21.26 Groups= 3 Values = 59. P=0.0005. (WT has non-gaussian distribution)	**WT vs Kv3.3KO P=0.0055 : WT vs Kv3.1KO P=0.3862. : **Kv3.3KO vs Kv3.1KO P=<0.0001	WT 0.45 ± 0.13 Kv3.3KO 0.32 ± 0.08. Kv3.1KO 0.55 ± 0.19
		PPR -EPSC2/EPSC1 -200Hz	WT- 10 Kv3.3KO - 9 KV3.1KO - 5	WT - 6 Kv3.3KO - 4. Kv3.1KO - 3	One-way ANOVA & Tukey's post hoc F(2,21)=26.3 P=<0.0001	**WT vs Kv3.3KO P=<0.0001 : WT vs Kv3.1KO P=>0.6257 : **Kv3.3KO vs Kv3.1KO P=<0.0001	WT 0.90 ± 0.03 Kv3.3KO 0.71 ± 0.10 Kv3.1KO 0.93 ± 0.05
		PPR -EPSC80/EPSC1 -200Hz	WT - 10 Kv3.3KO - 9 KV3.1KO - 5	WT- 6 Kv3.3KO - 4. Kv3.1KO - 3	Kruksal-Wallis ANOVA and Dunn's post hoc for multiple comparisons. Kruksal-Wallis statistic=15.39 Groups= 3 Values = 24. P=0.0005. (Kv3.3KO has non-gaussian distribution)	**WT vs Kv3.3KO P=0.0148 : WT vs Kv3.1KO P=0.4897. : **Kv3.3KO vs Kv3.1KO P=0.0007	WT 0.34 ± 0.10. Kv3.3KO 0.22 ± 0.03 Kv3.1KO 0.56 ± 0.20
	Text (400 Hz)	PPR -EPSC2/EPSC1 -400Hz	WT - 8 Kv3.3KO - 9 KV3.1KO - 6		One-way ANOVA & Tukey's post hoc	**WT vs Kv3.3KO P=0.0005 : WT vs Kv3.1KO P=0.98 : **Kv3.3KO vs Kv3.1KO P=0.0017	WT 0.91 ± 0.06 Kv3.3KO 0.68 ± 0.1 Kv3.1KO 0.90 ± 0.14
		PPR -EPSC80/EPSC1 -400Hz	WT - 8 Kv3.3KO - 9 KV3.1KO - 6		One-way ANOVA & Tukey's post hoc	**WT vs Kv3.3KO P=0.0003 : WT vs Kv3.1KO P=0.13 : Kv3.3KO vs Kv3.1KO P=0.078	WT 0.25 ± 0.09 Kv3.3KO 0.1± 0.02 Kv3.1KO 0.18 ± 0.04
		PPR -EPSC2/EPSC1 -600Hz	WT - 10 Kv3.3KO - 8 KV3.1KO - 5	WT- 6 Kv3.3KO - 4 Kv3.1KO - 3	One-way ANOVA & Tukey's post hoc F(2,20)=9.07 P=0.0016	**WT vs Kv3.3KO P=0.0186 : WT vs Kv3.1KO P=0.2534 : **Kv3.3KO vs Kv3.1KO P=0.0017	WT 0.81 ± 0.08 Kv3.3KO 0.66 ± 0.14 Kv3.1KO 0.90 ± 0.07
		PPR -EPSC80/EPSC1 -600Hz	WT - 10 Kv3.3KO - 8 KV3.1KO - 5	WT - 6 Kv3.3KO - 4 Kv3.1KO - 3	One-way ANOVA & Tukey's post hoc F(2,20)=6.04 P=0.009	**WT vs Kv3.3KO P=0.0182 : WT vs Kv3.1KO P=0.8963 : **Kv3.3KO vs Kv3.1KO P=0.0215	WT 0.15 ± 0.04 Kv3.3KO 0.09 ± 0.01 Kv3.1KO 0.16 ± 0.07
	4E	100 Hz train	WT - 21 Kv3.3KO - 21 Kv3.1KO - 17	WT - 11 Kv3.3KO - 10 Kv3.1KO - 8	One-way ANOVA & Tukey's post hoc
					Decay tau F(2,56)=46.71 P=<0.0001	**WT vs Kv3.3KO P=<0.0001 : WT vs Kv3.1KO P=0.2305 : **Kv3.3KO vs Kv3.1KO P=<0.0001	WT 40.76 ± 7.39 ms. Kv3.3 KO 23.96 ± 5.39 ms Kv3.1 KO 44.63 ± 8.65 ms
					Amplitude at steady state F(2,56)=16.21 P=<0.0001	**WT vs Kv3.3KO P=0.0123 : **WT vs Kv3.1KO P=0.0183 : **Kv3.3KO vs Kv3.1KO P=<0.0001	WT 0.44 ± 0.11. Kv3.3KO 0.32 ± 0.08 Kv3.1KO 0.55 ± 0.18
	4F	200Hz train	WT - 10 Kv3.3KO - 9 KV3.1KO - 5	WT - 6 Kv3.3KO - 4. Kv3.1KO - 3	One-way ANOVA & Tukey's post hoc
					Decay tau F(2,21)=27.87 P=<0.0001	**WT vs Kv3.3KO P=<0.0001 : **WT vs Kv3.1KO P=0.0384 : **Kv3.3KO vs Kv3.1KO P=<0.0001	WT 25.40 ± 5.70 ms Kv3.3KO 12.94 ± 4.38 ms Kv3.1KO 32.75 ± 4.86 ms
					Amplitude at steady state F(2,21)=11.61 P=0.0004	**WT vs Kv3.3KO P=0.0279 : WT vs Kv3.1KO P=0.0535 : **Kv3.3KO vs Kv3.1KO P=0.0003	WT 0.34 ± 0.10 Kv3.3KO 0.22 ± 0.03 Kv3.1KO 0.47 ± 0.14
	Text only	400Hz train
			WT - 7 Kv3.3KO - 6 KV3.1KO - 4		Decay tau		WT 6.99±4.85 ms Kv3.3KO 3.16±1.38 ms Kv3.1KO 4.8±1.97
			WT - 6 Kv3.3KO - 7 KV3.1KO - 3		Amplitude at steady state: one-way ANOVA, Tukey's post hoc	**Kv3.3KO vs WT P=0.025 Kv3.1KO vs WT P=0.06	WT 0.26±0.12 Kv3.3KO 0.12±0.037 Kv3.1KO 0.12±0.042
	4G	600Hz train	WT - 10 Kv3.3KO - 8 KV3.1KO - 5	WT - 6 Kv3.3KO - 4 Kv3.1KO - 3
					Decay tau F(2,20)=8.267 P=0.0024	WT vs Kv3.3KO P=0.1655 : **WT vs Kv3.1KO P=0.0443 : **Kv3.3KO vs Kv3.1KO P=0.0017	WT 11.1 ± 2.07 ms Kv3.3KO 5.67 ± 0.95 ms Kv3.1KO 19.64 ± 13.04
					Amplitude at steady state F(2,20)=11.48 P=0.0005	**WT vs Kv3.3KO P=0.0009 : WT vs Kv3.1KO P=0.9828 : **Kv3.3KO vs Kv3.1KO P=0.0031	WT 0.11 ± 0.03 Kv3.3KO 0.065 ± 0.009 Kv3.1KO 0.11 ± 0.02
Recovery curves	5D	Recovery	WT - 11 Kv3.3KO - 10. Kv3.1KO - 9	WT - 6. Kv3.3KO - 4. Kv3.1KO - 4					Mice age range: P21-P25
	5E	% tau fast	WT - 11 Kv3.3KO - 10. Kv3.1KO - 9	WT - 6. Kv3.3KO - 4. Kv3.1KO - 4	% tau fast one-way ANOVA. F(2,26)=1.392 P=0.2665	ns	WT 60.11±12.83. Kv3.3KO 49.94 ± 13.38. Kv3.1KO 57.37 ± 17.08
	5F	Tfast	WT - 11 Kv3.3KO - 10. Kv3.1KO - 9	WT - 6. Kv3.3KO - 4. Kv3.1KO - 4	Kruksall Wallis & Dunns multiple comparison Kruksal-Wallis statistic=7.514 Groups=3 Values=30 P=0.0233 (Kv3.3KO has non-gaussian distribution)	**WT vs Kv3.3KO P=0.0250. : WT vs Kv3.1KO P=>0.9999. : Kv3.3KO vs Kv3.1KO P=0.1495	WT 0.46 ± 0.15 s Kv3.3KO 0.22 ± 0.20 s Kv3.1KO 0.41 ± 0.21 s
	5G	Slow	WT - 11 Kv3.3KO - 10. Kv3.1KO - 9	WT - 6. Kv3.3KO - 4. Kv3.1KO - 4	Kruksall Wallis & Dunns multiple comparison Kruksal-Wallis statistic=0.6823 Groups=3 Values=30 P=0.7110 (Kv3.3KO has non-gaussian distribution)	ns	WT 4.68 ± 3.41 s Kv3.3KO 3.29 ±1.67 s Kv3.1KO 4.29 ± 2.53 s
High frequency stimulation: AP trains.	7A	WT at 100 Hz	20	13			100±0		Mice age range: P20-P27
		WT at 200 Hz	15	11			100 ± 0
		WT at 300 Hz	10	9			93.82 ± 12.54
		WT at 400 Hz	11	9			79.60 ± 19.54
		WT at 600 Hz	5	4			52.46527778±9.408379039
		Kv3.3KO at 100 Hz	9	5	N/A identical values		100 ± 0
		Kv3.3KO at 200 Hz	9	5	One-way ANOVA: Tukey's multiple comparison test	Kv3.3KO vs WT P=0.2729	98.57638889 ± 4.270833333
		Kv3.3KO at 300 Hz	7	4	One-way ANOVA: Tukey's multiple comparison test	Kv3.3KO vs WT P=0.7726	89.13258249 ± 18.8191301
		Kv3.3KO at 400 Hz	7	4	One-way ANOVA: Tukey's multiple comparison test	Kv3.3KO vs WT P=0.4336	69.16666714 ± 20.59428839
		Kv3.3KO at 600 Hz	7	4	One-way ANOVA: Tukey's multiple comparison test	** Kv3.3KO vs WT P=0.0044	29.80158762 ± 10.43835918
		Kv3.1KO at 100 Hz	9	6	N/A identical values		100 ± 0
		Kv3.1KO at 200 Hz	9	6	One-way ANOVA: Tukey's multiple comparison test	Kv3.1KO vs WT P=0.9943	99.90740741 ± 0.277777777
		Kv3.1KO at 300 Hz	8	6	One-way ANOVA: Tukey's multiple comparison test	Kv3.1KO vs WT P=0.5523	86.6701243 ± 17.48639644
		Kv3.1KO at 400 Hz	7	5	One-way ANOVA: Tukey's multiple comparison test	Kv3.1KO vs WT P=0.5030	70.33482095 ± 21.32204318
		Kv3.1KO at 600 Hz	6	5	One-way ANOVA: Tukey's multiple comparison test	**Kv3.1KO vs WT P=0.046	36.29629667 ± 11.11646304
Phase I duration (% of an 800ms train)	7C	WT at 100Hz	12	8	Two-way ANOVA: Tukey's multiple comparison test	N/A identical values	100 ± 0		Mice age range: P20-P27
		Kv3.3KO at 100 Hz	13	6		N/A identical values	100 ± 0
		Kv3.1KO at 100 Hz	8	5		N/A identical values	100 ± 0
		WT at 200 Hz	11	9		N/A identical values	100 ± 0
		Kv3.3KO at 200 Hz	11	6		N/A identical values	100 ± 0
		Kv3.1KO at 200 Hz	7	5		N/A identical values	100 ± 0
		WT at 300 Hz	7	5			76.01 ± 35
		Kv3.3KO at 300 Hz	8	5		vs WT 300 Hz P=0.99	89.88 ± 25.32
		Kv3.1KO at 300 Hz	9	7		vs WT 300 Hz P=0.99	62.15±44.52
		WT at 400 Hz	13	9			33.84 ± 22.93
		Kv3.3KO at 400 Hz	7	6		vs WT 400 Hz P=0.99	24.1 ± 26.39
		Kv3.1KO at 400 Hz	7	6		vs WT 400 Hz P>0.99	38.9 ± 44.25
		WT at 600 Hz	10	7			4.31 ± 1.63
		Kv3.3KO at 600 Hz	6	4		vs WT 600 Hz P>0.99	3.07 ± 1.04
		Kv3.1KO at 600 Hz	5	4		vs WT 600 Hz P>0.99	3.22 ± 1.74
Phases duration at 600 Hz (in % of an 800ms train)	7D	Duration of phase I at 600 Hz	WT=10 : Kv3.3KO = 6 : Kv3.1KO = 5	WT=7: Kv3.3KO=4: Kv3.1KO=4			WT = 4.3 ± 1.54 : Kv3.3KO = 3.07 2 ± 1.04 : Kv3.1KO = 3.2 2 ± 1.75		Mice age range: P20-P27
		Duration of phase II at 600 Hz	WT=10 : Kv3.3KO = 6 : Kv3.1KO = 5	WT=7: Kv3.3KO=4: Kv3.1KO=4	Two-way ANOVA: Tukey's multiple comparison test	** WT CBA vs Kv3.3KO P=0.0135	WT = 59.5 ± 26.4 : Kv3.3KO = 96 ± 2.67 : Kv3.1KO = 71.45 ± 29.6
		Duration of Phase III at 600 Hz	WT=10 : Kv3.3KO = 6 : Kv3.1KO = 5	WT=7: Kv3.3KO=4: Kv3.1KO=4	Two-way ANOVA: Tukey's multiple comparison test	** WT CBA vs Kv3.3KO P=0.0213	WT = 35.85 ± 25.94 : Kv3.3KO = 0.917 ± 2.245 : Kv3.1KO = 25.33 ± 30.4
Plateau amplitude (mV)	7F	WT at 100Hz	13	8			-0.41 ± 3.52		Mice age range: P20-P27
		Kv3.3KO at 100 Hz	11	6	Two-way ANOVA: Tukey's multiple comparison test	vs WT 100 Hz P>0.99	-1.09 ± 1.51
		Kv3.1KO at 100 Hz	5	3	Two-way ANOVA: Tukey's multiple comparison test	vs WT 100 Hz P=0.99	2.93 ± 1.36
		WT at 200 Hz	10	7	Two-way ANOVA: Tukey's multiple comparison test	vs WT 100 Hz P>0.99	-0.85 ± 4.8
		Kv3.3KO at 200 Hz	10	6	Two-way ANOVA: Tukey's multiple comparison test	vs WT 100 Hz P>0.99	-0.9 ± 2.72
		Kv3.1KO at 200 Hz	8	6	Two-way ANOVA: Tukey's multiple comparison test	**vs WT 100 Hz: P=0.002	9.208 ± 4.39
		WT at 300 Hz	7	6	Two-way ANOVA: Tukey's multiple comparison test	vs WT 100 Hz P=0.88	3.67 ± 6.92
		Kv3.3KO at 300 Hz	7	5	Two-way ANOVA: Tukey's multiple comparison test	vs WT 100 Hz P>0.99	1.5 ± 2.56
		Kv3.1KO at 300 Hz	6	5	Two-way ANOVA: Tukey's multiple comparison test	** vs WT 100 Hz: P< 0.0001	15.44 ± 7.12
		WT at 400 Hz	8	6	Two-way ANOVA: Tukey's multiple comparison test	** vs WT 100 Hz: P< 0.0001	11.08 ± 6.23
		Kv3.3KO at 400 Hz	6	5	Two-way ANOVA: Tukey's multiple comparison test	vs WT 100 Hz =0.31	6 ± 4.7
		Kv3.1KO at 400 Hz	5	4	Two-way ANOVA: Tukey's multiple comparison test	** vs WT 100 Hz: P< 0.0001	18.47 ± 8.15
		WT at 600 Hz	5	4	Two-way ANOVA: Tukey's multiple comparison test	** vs WT 100 Hz: P< 0.0001	18.07 ± 3.87
		Kv3.3KO at 600 Hz	6	5	Two-way ANOVA: Tukey's multiple comparison test	** vs WT 100 Hz: P< 0.0001	12.28 ± 3.54
		Kv3.1KO at 600 Hz	4	3	Two-way ANOVA: Tukey's multiple comparison test	** vs WT 100 Hz: P< 0.0001	22.47 ± 9.2
Time of half decay (ms): measured at the end of a 300 Hz AP train)	7H	WT	7	6			2.79 ± 1.73		Mice age range: P20-P27
		Kv3.3KO	6	5	One-way ANOVA: Tukey's post hoc	vs WT P=0.95	1.89 ± 0.92
		Kv3.1KO	8	6	One-way ANOVA: Tukey's post hoc	**vs WT P=0.0005; **vs KV3.3KO P=0.0004	15.96 ± 8.587
Membrane time constant	7I	WT at 300 Hz	8	6			2.74± 1.265		Mice age range: P20-P27
		Kv3.3KO at 300 Hz	8	5	One-way ANOVA: Tukey's post hoc	vs WT P=0.77	3.1± 0.87
		Kv3.1KO at 300 Hz	6	4	One-way ANOVA: Tukey's post hoc	vs WT P=0.35; vs Kv3.3KO P=0.72	3.54± 0.9
ABR	Text	Click	N/A	CBA WT - 5. Kv3.3 KO - 6	unpaired t-test with Holm-Šídák’s test for multiple comparisons	CBA vs Kv3.3 KO t=1.319 P=0.77	WT= 31±2dB SPL: Kv3.3KO= 37±9dB SPL		Mice age: 6 months
in vivo							mean ± SD (data not normally distributed; consider median and quartiles in next column)	median and quartiles	Mice age range: 6-8 months
	8B	presynaptic halfwidth	WT - 20 Kv3.3KO - 13	WT - 5 Kv3.3KO - 6	Mann-Whitney Rank Sum Test. P=0.036.	**WT vs Kv3.3KO P=0.036	WT 0.172± 0.021ms Kv3.3KO 0.243 ± 0.09 ms	WT 0.17± 0.157/0.190 ms Kv3.3KO 0.25 ± 0.161/0.306 ms
	8C	synaptic delay	WT - 20 Kv3.3KO - 13	WT - 5 Kv3.3KO - 6	Mann-Whitney Rank Sum Test. P=0.013.	**WT vs Kv3.3KO P=0.013	WT 0.449 ± 0.053 ms Kv3.3KO 0.582 ± 0.169 ms	WT 0.441 ± 0.411/0.493 ms Kv3.3KO 0.563± 0.448/0.704 ms
	8D	postsynaptic halfwidth	WT - 20 Kv3.3KO - 13	WT - 5 Kv3.3KO - 6	Mann-Whitney Rank Sum Test. P= <0.001.	***WT vs Kv3.3KO P= <0.001	WT 0.372± 0.091ms Kv3.3KO 0.682 ± 0.209 ms	WT 0.357 ± 0.294/0.456 ms Kv3.3KO 0.642± 0.483/0.820 ms
	8H	peak firing rate	WT - 22 Kv3.3KO - 18	WT - 5 Kv3.3KO - 6	Mann-Whitney Rank Sum Test. P=0.003.	**WT vs Kv3.3KO P=0.003	WT 345± 134 Hz Kv3.3KO 232 ± 57 Hz	WT 350 ± 200/425 Hz Kv3.3KO 240 ± 180/280 Hz
	8J	fist spike latency	WT - 25 Kv3.3KO - 18	WT - 5 Kv3.3KO - 6	Mann-Whitney Rank Sum Test. P=0.015.	**WT vs Kv3.3KO P=0.015	WT 3.564± 0.698 ms Kv3.3KO 5.208 ± 2.501 ms	WT 3.442 ± 3.012/4.209 ms Kv3.3KO 4.059 ± 3.595/6.514 ms
	8K	jitter	WT - 25 Kv3.3KO - 18	WT - 5 Kv3.3KO - 6	Mann-Whitney Rank Sum Test. P= <0.001.	***WT vs Kv3.3KO P= <0.001	WT 0.307± 0.256 ms Kv3.3KO 1.052 ± 0.640 ms	WT 0.177 ± 0.097/0.505 ms Kv3.3KO 0.917 ± 0.595/1.504 ms
	8L	spontaneous firing rate	WT - 24 Kv3.3KO - 19	WT - 5 Kv3.3KO - 6	Mann-Whitney Rank Sum Test. P=0.044.	**WT vs Kv3.3KO P=0.044	WT 27.775± 30.292 Hz Kv3.3KO 47.958 ± 38.468 Hz	WT 16.5 ± 4.5/42.75 Hz Kv3.3KO 40.0 ± 19.3/62.6 Hz
	8M	signal-noise-ratio	WT - 18 Kv3.3KO - 14	WT - 5 Kv3.3KO - 6	Mann-Whitney Rank Sum Test. P= <0.001.	***WT vs Kv3.3KO P= <0.001	WT 28.752 ± 36.557 Kv3.3KO 3.720 ± 2.564	WT 9.701 ± 4.378/40.950 Kv3.3KO 2.769 ± 2.040/3.994
